# Supplementary material for: Multiple Occurrences of a 168-Nucleotide Deletion in SARS-CoV-2 ORF8, Unnoticed by Standard Amplicon Sequencing and Variant Calling Pipelines
Source: Viruses. 2021 Sep 18;13(9):1870. doi: 10.3390/v13091870 (PMC8518987; doi:10.3390/v13091870)
Supplement: Supplementary file 1 [file viruses-13-01870-s001.zip]

Archive with 8 entries (8 files):
- Brandt_et_al._Supplementary_Text_Viruses.pdf
- Brandt_et_al._Viruses_Supplementary_Figure_S1_rev1.tiff
- Brandt_et_al._Viruses_Supplementary_Figure_S2_rev1.tiff
- Brandt_et_al._Viruses_Supplementary_Figure_S3_rev1.tiff
- Brandt_et_al._Viruses_Supplementary_Figure_S4_rev1.tiff
- Brandt_et_al._Viruses_Supplementary_Table_S1.xlsx
- Brandt_et_al._Viruses_Supplementary_Table_S2.xlsx
- Brandt_et_al._Viruses_Supplementary_Table_S3.xlsx
