# Supplementary material for: Multiple Occurrences of a 168-Nucleotide Deletion in SARS-CoV-2 ORF8, Unnoticed by Standard Amplicon Sequencing and Variant Calling Pipelines
Source: Viruses. 2021 Sep 18;13(9):1870. doi: 10.3390/v13091870 (PMC8518987; doi:10.3390/v13091870)
Supplement: Supplementary file 1 [file viruses-13-01870-s001.zip › Brandt_et_al._Viruses_Supplementary_Table_S1.xlsx]

## Sheet: Nanopore
sample_id	isolate	pass reads	pass bases	pass reads mapping MN908947.3	pass reads mapping GRCh38	pass reads mapping both	pass reads mapping MN908947.3 only	reads upload	bases upload	reads analyzed	bases analyzed
NW-UBI-221	hCoV-19/Germany/NW-UBI-221/2021	7575	4408074	5816	484	8	5808	5808	3853784	5917	3870179
NW-UBI-222	hCoV-19/Germany/NW-UBI-222/2021	26613	28849885	22601	3259	93	22508	22508	27057232	24961	27498318
NW-UBI-223	hCoV-19/Germany/NW-UBI-223/2021	13216	8044323	11459	78	21	11438	11438	7427303	10754	7199727
NW-UBI-224	hCoV-19/Germany/NW-UBI-224/2021	159539	136436076	78960	69537	195	78765	78765	95846417	153726	133477045
NW-UBI-225	hCoV-19/Germany/NW-UBI-225/2021	22545	24929517	20425	1196	75	20350	20350	23957848	21081	23754517
NW-UBI-226	hCoV-19/Germany/NW-UBI-226/2021	19229	21801115	17594	1049	62	17532	17532	20970330	17866	20429348
NW-UBI-227	hCoV-19/Germany/NW-UBI-227/2021	11836	7362919	9947	86	8	9939	9939	6601718	9535	6385049
NW-UBI-228	hCoV-19/Germany/NW-UBI-228/2021	8452	5098749	7311	59	12	7299	7299	4764780	6998	4685184
NW-UBI-230	hCoV-19/Germany/NW-UBI-230/2021	26105	29837823	24785	804	58	24727	24727	29151647	24813	28521320
NW-UBI-231	hCoV-19/Germany/NW-UBI-231/2021	260751	320583883	257337	1913	635	256702	256702	318169983	239055	279198144
NW-UBI-232	hCoV-19/Germany/NW-UBI-232/2021	133262	145012531	110510	7051	117	110393	110393	132916826	128734	141871173
NW-UBI-233	hCoV-19/Germany/NW-UBI-233/2021	51808	40405044	20192	29883	427	19765	19765	23658447	47111	37452617
NW-UBI-234	hCoV-19/Germany/NW-UBI-234/2021	26402	28645793	22355	3658	92	22263	22263	26542443	24968	27497068
NW-UBI-235	hCoV-19/Germany/NW-UBI-235/2021	20005	23370862	19329	545	59	19270	19270	22973186	19072	22304812
NW-UBI-236	hCoV-19/Germany/NW-UBI-236/2021	43762	52017451	43101	548	101	43000	43000	51546588	41870	49794319
NW-UBI-237	hCoV-19/Germany/NW-UBI-237/2021	39411	33875905	20568	7245	136	20432	20432	24215033	36347	31855387
NW-UBI-238	hCoV-19/Germany/NW-UBI-238/2021	21950	23972946	19783	1729	49	19734	19734	22968412	20762	22971572
NW-UBI-239	hCoV-19/Germany/NW-UBI-239/2021	124649	76078668	102936	14992	55	102881	102881	69185763	109806	72704629
NW-UBI-240	hCoV-19/Germany/NW-UBI-240/2021	41316	20491949	29953	2003	23	29930	29930	17963013	28500	17950867
NW-UBI-241	hCoV-19/Germany/NW-UBI-241/2021	173780	178919110	133242	26679	207	133035	133035	162691470	162947	173024279
NW-UBI-242	hCoV-19/Germany/NW-UBI-242/2021	66909	39342100	13472	46124	65	13407	13407	16332325	59281	37207343
NW-UBI-243	hCoV-19/Germany/NW-UBI-243/2021	298244	296627676	270592	9788	55	270537	270537	288390456	273633	289125988
NW-UBI-244	hCoV-19/Germany/NW-UBI-244/2021	58128	30689307	42222	5353	19	42203	42203	26445386	44205	27763786
NW-UBI-245	hCoV-19/Germany/NW-UBI-245/2021	66321	37845801	56298	1468	16	56282	56282	35561599	53120	35094213
NW-UBI-246	hCoV-19/Germany/NW-UBI-246/2021	57557	33086691	49979	787	11	49968	49968	31397746	46386	30739613
NW-UBI-247	hCoV-19/Germany/NW-UBI-247/2021	150252	98425991	102818	20341	125	102693	102693	81935712	122896	90652434
NW-UBI-248	hCoV-19/Germany/NW-UBI-248/2021	25516	14092302	20490	830	8	20482	20482	12945567	19579	12862332
NW-UBI-249	hCoV-19/Germany/NW-UBI-249/2021	142909	115173906	100966	25009	66	100900	100900	99452815	122917	110298933
NW-UBI-250	hCoV-19/Germany/NW-UBI-250/2021	69603	36519207	51071	3403	17	51054	51054	32068105	50757	32634400
NW-UBI-251	hCoV-19/Germany/NW-UBI-251/2021	47712	27850671	41809	919	14	41795	41795	26471021	39482	26110761
NW-UBI-252	hCoV-19/Germany/NW-UBI-252/2021	29290	23148212	13767	10651	13	13754	13754	16583542	26033	22205653
NW-UBI-253	hCoV-19/Germany/NW-UBI-253/2021	81391	95510103	78440	1046	8	78432	78432	94441330	79928	94628077
NW-UBI-254	hCoV-19/Germany/NW-UBI-254/2021	76833	62369911	73045	510	2	73043	73043	61499818	67875	58876284
NW-UBI-255	hCoV-19/Germany/NW-UBI-255/2021	44625	41804639	40018	1370	2	40016	40016	40613202	38623	38934743
NW-UBI-256	hCoV-19/Germany/NW-UBI-256/2021	259974	271759852	216436	26198	171	216265	216265	257056339	240029	261407264
NW-UBI-257	hCoV-19/Germany/NW-UBI-257/2021	55985	62613787	51775	2287	8	51767	51767	61137428	54265	61848028
NW-UBI-258	hCoV-19/Germany/NW-UBI-258/2021	89228	101254173	86400	1420	4	86396	86396	100358651	87016	99960135
NW-UBI-259	hCoV-19/Germany/NW-UBI-259/2021	253158	281667467	223171	21813	191	222980	222980	270370522	244248	275827340
NW-UBI-260	hCoV-19/Germany/NW-UBI-260/2021	108438	122811528	98695	6490	32	98663	98663	119744065	104185	121140360
NW-UBI-261	hCoV-19/Germany/NW-UBI-261/2021	136228	83873260	125069	1414	39	125030	125030	80965610	116133	78970791
NW-UBI-262	hCoV-19/Germany/NW-UBI-262/2021	205458	121910314	177177	8614	76	177101	177101	113740839	170022	112999293
NW-UBI-263	hCoV-19/Germany/NW-UBI-263/2021	80547	78755287	58517	16366	48	58469	58469	69886644	76808	77199926
NW-UBI-264	hCoV-19/Germany/NW-UBI-264/2021	73481	74346908	58409	8799	15	58394	58394	68820667	70340	73131727

## Sheet: Illumina
sample_id	isolate	paired reads	total bases	paired reads with >=1 alignment to MN908947.3	paired reads with >=1 alignment to GRCh38	paired reads with >=1 alignment to both	paired reads with >=1 alignment to MN908947.3 only	paired reads upload	bases upload
NW-UBI-221	hCoV-19/Germany/NW-UBI-221/2021	333292	50411781	177016	411	0	177016	177016	13382795
NW-UBI-223	hCoV-19/Germany/NW-UBI-223/2021	282134	42684291	118640	4	0	118640	118640	8970183
NW-UBI-227	hCoV-19/Germany/NW-UBI-227/2021	357118	54020374	175491	149	0	175491	175491	13267571
NW-UBI-228	hCoV-19/Germany/NW-UBI-228/2021	305308	46176685	138432	16	0	138432	138432	10466605
NW-UBI-229	hCoV-19/Germany/NW-UBI-229/2021	302404	45744854	119730	20	0	119730	119730	9051877
