# Supplementary material for: Multiple Occurrences of a 168-Nucleotide Deletion in SARS-CoV-2 ORF8, Unnoticed by Standard Amplicon Sequencing and Variant Calling Pipelines
Source: Viruses. 2021 Sep 18;13(9):1870. doi: 10.3390/v13091870 (PMC8518987; doi:10.3390/v13091870)
Supplement: Supplementary file 1 [file viruses-13-01870-s001.zip › Brandt_et_al._Viruses_Supplementary_Table_S2.xlsx]

## Sheet: description
Description of Supplementary Table S2 (Brandt et al., Eurosurveillance)
Sheet1	Mutation and QC data from Nextclade. All 44 sequenced outbreak samples have been subjected to Nextclade. Sheet 1 further contains sequence IDs used in Figure 1 and Figure 4 of the paper. GISAID accessions were also added.
Sheet2	SARS-CoV-2 genomes used for the phylogenetic analysis shown in Figure 3 of the paper.
Sheet3	SARS-CoV-2 genomes where corresponding raw data from ENA show at least one read confirming the ∆168 deletion.

## Sheet: Sheet1
id	pseudonym	accession	clade	qc.overallScore	qc.overallStatus	totalGaps	totalInsertions	totalMissing	totalMutations	totalNonACGTNs	totalPcrPrimerChanges	substitutions	deletions	insertions	missing	nonACGTNs	pcrPrimerChanges	aaSubstitutions	totalAminoacidSubstitutions	aaDeletions	totalAminoacidDeletions	alignmentEnd	alignmentScore	alignmentStart	qc.missingData.missingDataThreshold	qc.missingData.score	qc.missingData.status	qc.missingData.totalMissing	qc.mixedSites.mixedSitesThreshold	qc.mixedSites.score	qc.mixedSites.status	qc.mixedSites.totalMixedSites	qc.privateMutations.cutoff	qc.privateMutations.excess	qc.privateMutations.status	qc.privateMutations.total	qc.snpClusters.clusteredSNPs	qc.snpClusters.score	qc.snpClusters.status	qc.snpClusters.totalSNPs	errors	qc.seqName	nearestTreeNodeId
hCoV-19/Germany/NW-UBI-221/2021	D4	EPI_ISL_2466357	20B	2777777777777770	good	168	0	189	21	0	3	C241T,G1820A,T2959C,C3037T,C3373A,G3431T,C6883T,G8861A,C11956T,C12249T,C14408T,C14599T,G20134T,G21724A,A23403G,T25577C,C25626T,C27002T,G28881A,G28882A,G28883C	28003-28171		1-55,29769-29904		ChinaCDC_N_F:G28881A;G28882A;G28883C	N:R203K,N:G204R,ORF1a:G519S,ORF1a:D1036E,ORF1a:V1056L,ORF1a:V2866M,ORF1a:A3995V,ORF1b:P314L,ORF1b:V2223L,ORF3a:I62T,ORF8:C37S,S:D614G	12	ORF8:P38-,ORF8:I39-,ORF8:H40-,ORF8:F41-,ORF8:Y42-,ORF8:S43-,ORF8:K44-,ORF8:W45-,ORF8:Y46-,ORF8:I47-,ORF8:R48-,ORF8:V49-,ORF8:G50-,ORF8:A51-,ORF8:R52-,ORF8:K53-,ORF8:S54-,ORF8:A55-,ORF8:P56-,ORF8:L57-,ORF8:I58-,ORF8:E59-,ORF8:L60-,ORF8:C61-,ORF8:V62-,ORF8:D63-,ORF8:E64-,ORF8:A65-,ORF8:G66-,ORF8:S67-,ORF8:K68-,ORF8:S69-,ORF8:P70-,ORF8:I71-,ORF8:Q72-,ORF8:Y73-,ORF8:I74-,ORF8:D75-,ORF8:I76-,ORF8:G77-…	56	29902	89117	0	3000	0	good	189	10	0	good	0	24	4	good	12		0	good	0		B0125_60710487	1788
hCoV-19/Germany/NW-UBI-222/2021	U7	EPI_ISL_2466358	20B	2777777777777770	good	168	0	189	21	0	3	C241T,G1820A,T2959C,C3037T,C3373A,G3431T,C6883T,G8861A,C11956T,C12249T,C14408T,C14599T,G20134T,G21724A,A23403G,T25577C,C25626T,C27002T,G28881A,G28882A,G28883C	28003-28171		1-55,29769-29904		ChinaCDC_N_F:G28881A;G28882A;G28883C	N:R203K,N:G204R,ORF1a:G519S,ORF1a:D1036E,ORF1a:V1056L,ORF1a:V2866M,ORF1a:A3995V,ORF1b:P314L,ORF1b:V2223L,ORF3a:I62T,ORF8:C37S,S:D614G	12	ORF8:P38-,ORF8:I39-,ORF8:H40-,ORF8:F41-,ORF8:Y42-,ORF8:S43-,ORF8:K44-,ORF8:W45-,ORF8:Y46-,ORF8:I47-,ORF8:R48-,ORF8:V49-,ORF8:G50-,ORF8:A51-,ORF8:R52-,ORF8:K53-,ORF8:S54-,ORF8:A55-,ORF8:P56-,ORF8:L57-,ORF8:I58-,ORF8:E59-,ORF8:L60-,ORF8:C61-,ORF8:V62-,ORF8:D63-,ORF8:E64-,ORF8:A65-,ORF8:G66-,ORF8:S67-,ORF8:K68-,ORF8:S69-,ORF8:P70-,ORF8:I71-,ORF8:Q72-,ORF8:Y73-,ORF8:I74-,ORF8:D75-,ORF8:I76-,ORF8:G77-…	56	29902	89117	0	3000	0	good	189	10	0	good	0	24	4	good	12		0	good	0		B0127_60708579	1788
hCoV-19/Germany/NW-UBI-223/2021	D3	EPI_ISL_2466359	20B	15625	good	168	0	189	20	0	3	C241T,G1820A,T2959C,C3037T,C3373A,G3431T,C6883T,G8861A,C12249T,C14408T,C14599T,G20134T,G21724A,A23403G,T25577C,C25626T,C27002T,G28881A,G28882A,G28883C	28003-28171		1-55,29769-29904		ChinaCDC_N_F:G28881A;G28882A;G28883C	N:R203K,N:G204R,ORF1a:G519S,ORF1a:D1036E,ORF1a:V1056L,ORF1a:V2866M,ORF1a:A3995V,ORF1b:P314L,ORF1b:V2223L,ORF3a:I62T,ORF8:C37S,S:D614G	12	ORF8:P38-,ORF8:I39-,ORF8:H40-,ORF8:F41-,ORF8:Y42-,ORF8:S43-,ORF8:K44-,ORF8:W45-,ORF8:Y46-,ORF8:I47-,ORF8:R48-,ORF8:V49-,ORF8:G50-,ORF8:A51-,ORF8:R52-,ORF8:K53-,ORF8:S54-,ORF8:A55-,ORF8:P56-,ORF8:L57-,ORF8:I58-,ORF8:E59-,ORF8:L60-,ORF8:C61-,ORF8:V62-,ORF8:D63-,ORF8:E64-,ORF8:A65-,ORF8:G66-,ORF8:S67-,ORF8:K68-,ORF8:S69-,ORF8:P70-,ORF8:I71-,ORF8:Q72-,ORF8:Y73-,ORF8:I74-,ORF8:D75-,ORF8:I76-,ORF8:G77-…	56	29902	89121	0	3000	0	good	189	10	0	good	0	24	3	good	11		0	good	0		B0130_60708603	1788
hCoV-19/Germany/NW-UBI-224/2021	U6	EPI_ISL_2466360	20B	2777777777777770	good	168	0	189	21	0	3	C241T,G1820A,T2959C,C3037T,C3373A,G3431T,C6883T,G8861A,C12249T,C13551T,C14408T,C14599T,G20134T,G21724A,A23403G,T25577C,C25626T,C27002T,G28881A,G28882A,G28883C	28003-28171		1-55,29769-29904		ChinaCDC_N_F:G28881A;G28882A;G28883C	N:R203K,N:G204R,ORF1a:G519S,ORF1a:D1036E,ORF1a:V1056L,ORF1a:V2866M,ORF1a:A3995V,ORF1b:P314L,ORF1b:V2223L,ORF3a:I62T,ORF8:C37S,S:D614G	12	ORF8:P38-,ORF8:I39-,ORF8:H40-,ORF8:F41-,ORF8:Y42-,ORF8:S43-,ORF8:K44-,ORF8:W45-,ORF8:Y46-,ORF8:I47-,ORF8:R48-,ORF8:V49-,ORF8:G50-,ORF8:A51-,ORF8:R52-,ORF8:K53-,ORF8:S54-,ORF8:A55-,ORF8:P56-,ORF8:L57-,ORF8:I58-,ORF8:E59-,ORF8:L60-,ORF8:C61-,ORF8:V62-,ORF8:D63-,ORF8:E64-,ORF8:A65-,ORF8:G66-,ORF8:S67-,ORF8:K68-,ORF8:S69-,ORF8:P70-,ORF8:I71-,ORF8:Q72-,ORF8:Y73-,ORF8:I74-,ORF8:D75-,ORF8:I76-,ORF8:G77-…	56	29902	89117	0	3000	0	good	189	10	0	good	0	24	4	good	12		0	good	0		B0132_60707611	1788
hCoV-19/Germany/NW-UBI-225/2021	U2	EPI_ISL_2466361	20B	15625	good	168	0	189	20	0	3	C241T,G1820A,T2959C,C3037T,C3373A,G3431T,C6883T,G8861A,C12249T,C14408T,C14599T,G20134T,G21724A,A23403G,T25577C,C25626T,C27002T,G28881A,G28882A,G28883C	28003-28171		1-55,29769-29904		ChinaCDC_N_F:G28881A;G28882A;G28883C	N:R203K,N:G204R,ORF1a:G519S,ORF1a:D1036E,ORF1a:V1056L,ORF1a:V2866M,ORF1a:A3995V,ORF1b:P314L,ORF1b:V2223L,ORF3a:I62T,ORF8:C37S,S:D614G	12	ORF8:P38-,ORF8:I39-,ORF8:H40-,ORF8:F41-,ORF8:Y42-,ORF8:S43-,ORF8:K44-,ORF8:W45-,ORF8:Y46-,ORF8:I47-,ORF8:R48-,ORF8:V49-,ORF8:G50-,ORF8:A51-,ORF8:R52-,ORF8:K53-,ORF8:S54-,ORF8:A55-,ORF8:P56-,ORF8:L57-,ORF8:I58-,ORF8:E59-,ORF8:L60-,ORF8:C61-,ORF8:V62-,ORF8:D63-,ORF8:E64-,ORF8:A65-,ORF8:G66-,ORF8:S67-,ORF8:K68-,ORF8:S69-,ORF8:P70-,ORF8:I71-,ORF8:Q72-,ORF8:Y73-,ORF8:I74-,ORF8:D75-,ORF8:I76-,ORF8:G77-…	56	29902	89121	0	3000	0	good	189	10	0	good	0	24	3	good	11		0	good	0		B0134_60707903	1788
hCoV-19/Germany/NW-UBI-226/2021	U3	EPI_ISL_2466362	20B	15625	good	168	0	189	20	0	3	C241T,G1820A,T2959C,C3037T,C3373A,G3431T,C6883T,G8861A,C12249T,C14408T,C14599T,G20134T,G21724A,A23403G,T25577C,C25626T,C27002T,G28881A,G28882A,G28883C	28003-28171		1-55,29769-29904		ChinaCDC_N_F:G28881A;G28882A;G28883C	N:R203K,N:G204R,ORF1a:G519S,ORF1a:D1036E,ORF1a:V1056L,ORF1a:V2866M,ORF1a:A3995V,ORF1b:P314L,ORF1b:V2223L,ORF3a:I62T,ORF8:C37S,S:D614G	12	ORF8:P38-,ORF8:I39-,ORF8:H40-,ORF8:F41-,ORF8:Y42-,ORF8:S43-,ORF8:K44-,ORF8:W45-,ORF8:Y46-,ORF8:I47-,ORF8:R48-,ORF8:V49-,ORF8:G50-,ORF8:A51-,ORF8:R52-,ORF8:K53-,ORF8:S54-,ORF8:A55-,ORF8:P56-,ORF8:L57-,ORF8:I58-,ORF8:E59-,ORF8:L60-,ORF8:C61-,ORF8:V62-,ORF8:D63-,ORF8:E64-,ORF8:A65-,ORF8:G66-,ORF8:S67-,ORF8:K68-,ORF8:S69-,ORF8:P70-,ORF8:I71-,ORF8:Q72-,ORF8:Y73-,ORF8:I74-,ORF8:D75-,ORF8:I76-,ORF8:G77-…	56	29902	89121	0	3000	0	good	189	10	0	good	0	24	3	good	11		0	good	0		B0135_60707887	1788
hCoV-19/Germany/NW-UBI-227/2021	U1	EPI_ISL_2466363	20B	15625	good	168	0	189	20	0	3	C241T,G1820A,T2959C,C3037T,C3373A,G3431T,C6883T,G8861A,C12249T,C14408T,C14599T,G20134T,G21724A,A23403G,T25577C,C25626T,C27002T,G28881A,G28882A,G28883C	28003-28171		1-55,29769-29904		ChinaCDC_N_F:G28881A;G28882A;G28883C	N:R203K,N:G204R,ORF1a:G519S,ORF1a:D1036E,ORF1a:V1056L,ORF1a:V2866M,ORF1a:A3995V,ORF1b:P314L,ORF1b:V2223L,ORF3a:I62T,ORF8:C37S,S:D614G	12	ORF8:P38-,ORF8:I39-,ORF8:H40-,ORF8:F41-,ORF8:Y42-,ORF8:S43-,ORF8:K44-,ORF8:W45-,ORF8:Y46-,ORF8:I47-,ORF8:R48-,ORF8:V49-,ORF8:G50-,ORF8:A51-,ORF8:R52-,ORF8:K53-,ORF8:S54-,ORF8:A55-,ORF8:P56-,ORF8:L57-,ORF8:I58-,ORF8:E59-,ORF8:L60-,ORF8:C61-,ORF8:V62-,ORF8:D63-,ORF8:E64-,ORF8:A65-,ORF8:G66-,ORF8:S67-,ORF8:K68-,ORF8:S69-,ORF8:P70-,ORF8:I71-,ORF8:Q72-,ORF8:Y73-,ORF8:I74-,ORF8:D75-,ORF8:I76-,ORF8:G77-…	56	29902	89121	0	3000	0	good	189	10	0	good	0	24	3	good	11		0	good	0		B0137_60707507	1788
hCoV-19/Germany/NW-UBI-228/2021	D1	EPI_ISL_2466364	20B	15625	good	168	0	295	20	0	3	C241T,G1820A,T2959C,C3037T,C3373A,G3431T,C6883T,G8861A,C12249T,C14408T,C14599T,G20134T,G21724A,A23403G,T25577C,C25626T,C27002T,G28881A,G28882A,G28883C	28003-28171		1-55,21457-21563,29769-29904		ChinaCDC_N_F:G28881A;G28882A;G28883C	N:R203K,N:G204R,ORF1a:G519S,ORF1a:D1036E,ORF1a:V1056L,ORF1a:V2866M,ORF1a:A3995V,ORF1b:P314L,ORF1b:V2223L,ORF3a:I62T,ORF8:C37S,S:D614G	12	ORF8:P38-,ORF8:I39-,ORF8:H40-,ORF8:F41-,ORF8:Y42-,ORF8:S43-,ORF8:K44-,ORF8:W45-,ORF8:Y46-,ORF8:I47-,ORF8:R48-,ORF8:V49-,ORF8:G50-,ORF8:A51-,ORF8:R52-,ORF8:K53-,ORF8:S54-,ORF8:A55-,ORF8:P56-,ORF8:L57-,ORF8:I58-,ORF8:E59-,ORF8:L60-,ORF8:C61-,ORF8:V62-,ORF8:D63-,ORF8:E64-,ORF8:A65-,ORF8:G66-,ORF8:S67-,ORF8:K68-,ORF8:S69-,ORF8:P70-,ORF8:I71-,ORF8:Q72-,ORF8:Y73-,ORF8:I74-,ORF8:D75-,ORF8:I76-,ORF8:G77-…	56	29902	89121	0	3000	0	good	295	10	0	good	0	24	3	good	11		0	good	0		B0139_60705832	1788
hCoV-19/Germany/NW-UBI-229/2021	D2	EPI_ISL_2466365	20B	55625	good	168	0	288	20	2	3	C241T,G1820A,T2959C,C3037T,C3373A,G3431T,C6883T,G8861A,C12249T,C14408T,C14599T,G20134T,G21724A,A23403G,T25577C,C25626T,C27002T,G28881A,G28882A,G28883C	28003-28171		1-28,21457-21659,27857-27880,29868-29904	Y:26228,M:28254	ChinaCDC_N_F:G28881A;G28882A;G28883C	N:R203K,N:G204R,ORF1a:G519S,ORF1a:D1036E,ORF1a:V1056L,ORF1a:V2866M,ORF1a:A3995V,ORF1b:P314L,ORF1b:V2223L,ORF3a:I62T,ORF8:C37S,S:D614G	12	ORF8:P38-,ORF8:I39-,ORF8:H40-,ORF8:F41-,ORF8:Y42-,ORF8:S43-,ORF8:K44-,ORF8:W45-,ORF8:Y46-,ORF8:I47-,ORF8:R48-,ORF8:V49-,ORF8:G50-,ORF8:A51-,ORF8:R52-,ORF8:K53-,ORF8:S54-,ORF8:A55-,ORF8:P56-,ORF8:L57-,ORF8:I58-,ORF8:E59-,ORF8:L60-,ORF8:C61-,ORF8:V62-,ORF8:D63-,ORF8:E64-,ORF8:A65-,ORF8:G66-,ORF8:S67-,ORF8:K68-,ORF8:S69-,ORF8:P70-,ORF8:I71-,ORF8:Q72-,ORF8:Y73-,ORF8:I74-,ORF8:D75-,ORF8:I76-,ORF8:G77-…	56	29902	89121	0	3000	0	good	288	10	20	good	2	24	3	good	11		0	good	0		B0141_60707522	1788
hCoV-19/Germany/NW-UBI-230/2021	U4	EPI_ISL_2466366	20B	2777777777777770	good	168	0	189	21	0	3	C241T,G1820A,T2959C,C3037T,C3373A,G3431T,C6883T,G8861A,C11956T,C12249T,C14408T,C14599T,G20134T,G21724A,A23403G,T25577C,C25626T,C27002T,G28881A,G28882A,G28883C	28003-28171		1-55,29769-29904		ChinaCDC_N_F:G28881A;G28882A;G28883C	N:R203K,N:G204R,ORF1a:G519S,ORF1a:D1036E,ORF1a:V1056L,ORF1a:V2866M,ORF1a:A3995V,ORF1b:P314L,ORF1b:V2223L,ORF3a:I62T,ORF8:C37S,S:D614G	12	ORF8:P38-,ORF8:I39-,ORF8:H40-,ORF8:F41-,ORF8:Y42-,ORF8:S43-,ORF8:K44-,ORF8:W45-,ORF8:Y46-,ORF8:I47-,ORF8:R48-,ORF8:V49-,ORF8:G50-,ORF8:A51-,ORF8:R52-,ORF8:K53-,ORF8:S54-,ORF8:A55-,ORF8:P56-,ORF8:L57-,ORF8:I58-,ORF8:E59-,ORF8:L60-,ORF8:C61-,ORF8:V62-,ORF8:D63-,ORF8:E64-,ORF8:A65-,ORF8:G66-,ORF8:S67-,ORF8:K68-,ORF8:S69-,ORF8:P70-,ORF8:I71-,ORF8:Q72-,ORF8:Y73-,ORF8:I74-,ORF8:D75-,ORF8:I76-,ORF8:G77-…	56	29902	89117	0	3000	0	good	189	10	0	good	0	24	4	good	12		0	good	0		B0143_60705819	1788
hCoV-19/Germany/NW-UBI-231/2021	U5	EPI_ISL_2466367	20B	2777777777777770	good	168	0	189	21	0	3	C241T,G1820A,T2959C,C3037T,C3373A,G3431T,C6883T,G8861A,C11956T,C12249T,C14408T,C14599T,G20134T,G21724A,A23403G,T25577C,C25626T,C27002T,G28881A,G28882A,G28883C	28003-28171		1-55,29769-29904		ChinaCDC_N_F:G28881A;G28882A;G28883C	N:R203K,N:G204R,ORF1a:G519S,ORF1a:D1036E,ORF1a:V1056L,ORF1a:V2866M,ORF1a:A3995V,ORF1b:P314L,ORF1b:V2223L,ORF3a:I62T,ORF8:C37S,S:D614G	12	ORF8:P38-,ORF8:I39-,ORF8:H40-,ORF8:F41-,ORF8:Y42-,ORF8:S43-,ORF8:K44-,ORF8:W45-,ORF8:Y46-,ORF8:I47-,ORF8:R48-,ORF8:V49-,ORF8:G50-,ORF8:A51-,ORF8:R52-,ORF8:K53-,ORF8:S54-,ORF8:A55-,ORF8:P56-,ORF8:L57-,ORF8:I58-,ORF8:E59-,ORF8:L60-,ORF8:C61-,ORF8:V62-,ORF8:D63-,ORF8:E64-,ORF8:A65-,ORF8:G66-,ORF8:S67-,ORF8:K68-,ORF8:S69-,ORF8:P70-,ORF8:I71-,ORF8:Q72-,ORF8:Y73-,ORF8:I74-,ORF8:D75-,ORF8:I76-,ORF8:G77-…	56	29902	89117	0	3000	0	good	189	10	0	good	0	24	4	good	12		0	good	0		B0144_60707199	1788
hCoV-19/Germany/NW-UBI-232/2021	N5	EPI_ISL_2466368	20B	2777777777777770	good	168	0	189	21	0	3	C241T,G1820A,T2959C,C3037T,C3373A,G3431T,C6883T,G7393A,G8861A,C12249T,C14408T,C14599T,G20134T,G21724A,A23403G,T25577C,C25626T,C27002T,G28881A,G28882A,G28883C	28003-28171		1-55,29769-29904		ChinaCDC_N_F:G28881A;G28882A;G28883C	N:R203K,N:G204R,ORF1a:G519S,ORF1a:D1036E,ORF1a:V1056L,ORF1a:V2866M,ORF1a:A3995V,ORF1b:P314L,ORF1b:V2223L,ORF3a:I62T,ORF8:C37S,S:D614G	12	ORF8:P38-,ORF8:I39-,ORF8:H40-,ORF8:F41-,ORF8:Y42-,ORF8:S43-,ORF8:K44-,ORF8:W45-,ORF8:Y46-,ORF8:I47-,ORF8:R48-,ORF8:V49-,ORF8:G50-,ORF8:A51-,ORF8:R52-,ORF8:K53-,ORF8:S54-,ORF8:A55-,ORF8:P56-,ORF8:L57-,ORF8:I58-,ORF8:E59-,ORF8:L60-,ORF8:C61-,ORF8:V62-,ORF8:D63-,ORF8:E64-,ORF8:A65-,ORF8:G66-,ORF8:S67-,ORF8:K68-,ORF8:S69-,ORF8:P70-,ORF8:I71-,ORF8:Q72-,ORF8:Y73-,ORF8:I74-,ORF8:D75-,ORF8:I76-,ORF8:G77-…	56	29902	89117	0	3000	0	good	189	10	0	good	0	24	4	good	12		0	good	0		B0152_60699075	1788
hCoV-19/Germany/NW-UBI-233/2021	N3	EPI_ISL_2466369	20B	15625	good	168	0	189	20	0	3	C241T,G1820A,T2959C,C3037T,C3373A,G3431T,C6883T,G8861A,C12249T,C14408T,C14599T,G20134T,G21724A,A23403G,T25577C,C25626T,C27002T,G28881A,G28882A,G28883C	28003-28171		1-55,29769-29904		ChinaCDC_N_F:G28881A;G28882A;G28883C	N:R203K,N:G204R,ORF1a:G519S,ORF1a:D1036E,ORF1a:V1056L,ORF1a:V2866M,ORF1a:A3995V,ORF1b:P314L,ORF1b:V2223L,ORF3a:I62T,ORF8:C37S,S:D614G	12	ORF8:P38-,ORF8:I39-,ORF8:H40-,ORF8:F41-,ORF8:Y42-,ORF8:S43-,ORF8:K44-,ORF8:W45-,ORF8:Y46-,ORF8:I47-,ORF8:R48-,ORF8:V49-,ORF8:G50-,ORF8:A51-,ORF8:R52-,ORF8:K53-,ORF8:S54-,ORF8:A55-,ORF8:P56-,ORF8:L57-,ORF8:I58-,ORF8:E59-,ORF8:L60-,ORF8:C61-,ORF8:V62-,ORF8:D63-,ORF8:E64-,ORF8:A65-,ORF8:G66-,ORF8:S67-,ORF8:K68-,ORF8:S69-,ORF8:P70-,ORF8:I71-,ORF8:Q72-,ORF8:Y73-,ORF8:I74-,ORF8:D75-,ORF8:I76-,ORF8:G77-…	56	29902	89121	0	3000	0	good	189	10	0	good	0	24	3	good	11		0	good	0		B0160_60696625	1788
hCoV-19/Germany/NW-UBI-234/2021	N4	EPI_ISL_2466370	20B	15625	good	168	0	189	20	0	3	C241T,G1820A,T2959C,C3037T,C3373A,G3431T,C6883T,G8861A,C12249T,C14408T,C14599T,G20134T,G21724A,A23403G,T25577C,C25626T,C27002T,G28881A,G28882A,G28883C	28003-28171		1-55,29769-29904		ChinaCDC_N_F:G28881A;G28882A;G28883C	N:R203K,N:G204R,ORF1a:G519S,ORF1a:D1036E,ORF1a:V1056L,ORF1a:V2866M,ORF1a:A3995V,ORF1b:P314L,ORF1b:V2223L,ORF3a:I62T,ORF8:C37S,S:D614G	12	ORF8:P38-,ORF8:I39-,ORF8:H40-,ORF8:F41-,ORF8:Y42-,ORF8:S43-,ORF8:K44-,ORF8:W45-,ORF8:Y46-,ORF8:I47-,ORF8:R48-,ORF8:V49-,ORF8:G50-,ORF8:A51-,ORF8:R52-,ORF8:K53-,ORF8:S54-,ORF8:A55-,ORF8:P56-,ORF8:L57-,ORF8:I58-,ORF8:E59-,ORF8:L60-,ORF8:C61-,ORF8:V62-,ORF8:D63-,ORF8:E64-,ORF8:A65-,ORF8:G66-,ORF8:S67-,ORF8:K68-,ORF8:S69-,ORF8:P70-,ORF8:I71-,ORF8:Q72-,ORF8:Y73-,ORF8:I74-,ORF8:D75-,ORF8:I76-,ORF8:G77-…	56	29902	89121	0	3000	0	good	189	10	0	good	0	24	3	good	11		0	good	0		B0161_60696624	1788
hCoV-19/Germany/NW-UBI-235/2021	N2	EPI_ISL_2466371	20B	15625	good	168	0	189	20	0	3	C241T,G1820A,T2959C,C3037T,C3373A,G3431T,C6883T,G8861A,C12249T,C14408T,C14599T,G20134T,G21724A,A23403G,T25577C,C25626T,C27002T,G28881A,G28882A,G28883C	28003-28171		1-55,29769-29904		ChinaCDC_N_F:G28881A;G28882A;G28883C	N:R203K,N:G204R,ORF1a:G519S,ORF1a:D1036E,ORF1a:V1056L,ORF1a:V2866M,ORF1a:A3995V,ORF1b:P314L,ORF1b:V2223L,ORF3a:I62T,ORF8:C37S,S:D614G	12	ORF8:P38-,ORF8:I39-,ORF8:H40-,ORF8:F41-,ORF8:Y42-,ORF8:S43-,ORF8:K44-,ORF8:W45-,ORF8:Y46-,ORF8:I47-,ORF8:R48-,ORF8:V49-,ORF8:G50-,ORF8:A51-,ORF8:R52-,ORF8:K53-,ORF8:S54-,ORF8:A55-,ORF8:P56-,ORF8:L57-,ORF8:I58-,ORF8:E59-,ORF8:L60-,ORF8:C61-,ORF8:V62-,ORF8:D63-,ORF8:E64-,ORF8:A65-,ORF8:G66-,ORF8:S67-,ORF8:K68-,ORF8:S69-,ORF8:P70-,ORF8:I71-,ORF8:Q72-,ORF8:Y73-,ORF8:I74-,ORF8:D75-,ORF8:I76-,ORF8:G77-…	56	29902	89121	0	3000	0	good	189	10	0	good	0	24	3	good	11		0	good	0		B0168_60695690	1788
hCoV-19/Germany/NW-UBI-236/2021	N1	EPI_ISL_2466372	20B	15625	good	168	0	189	20	0	3	C241T,G1820A,T2959C,C3037T,C3373A,G3431T,C6883T,G8861A,C12249T,C14408T,C14599T,G20134T,G21724A,A23403G,T25577C,C25626T,C27002T,G28881A,G28882A,G28883C	28003-28171		1-55,29769-29904		ChinaCDC_N_F:G28881A;G28882A;G28883C	N:R203K,N:G204R,ORF1a:G519S,ORF1a:D1036E,ORF1a:V1056L,ORF1a:V2866M,ORF1a:A3995V,ORF1b:P314L,ORF1b:V2223L,ORF3a:I62T,ORF8:C37S,S:D614G	12	ORF8:P38-,ORF8:I39-,ORF8:H40-,ORF8:F41-,ORF8:Y42-,ORF8:S43-,ORF8:K44-,ORF8:W45-,ORF8:Y46-,ORF8:I47-,ORF8:R48-,ORF8:V49-,ORF8:G50-,ORF8:A51-,ORF8:R52-,ORF8:K53-,ORF8:S54-,ORF8:A55-,ORF8:P56-,ORF8:L57-,ORF8:I58-,ORF8:E59-,ORF8:L60-,ORF8:C61-,ORF8:V62-,ORF8:D63-,ORF8:E64-,ORF8:A65-,ORF8:G66-,ORF8:S67-,ORF8:K68-,ORF8:S69-,ORF8:P70-,ORF8:I71-,ORF8:Q72-,ORF8:Y73-,ORF8:I74-,ORF8:D75-,ORF8:I76-,ORF8:G77-…	56	29902	89121	0	3000	0	good	189	10	0	good	0	24	3	good	11		0	good	0		B0178_60692600	1788
hCoV-19/Germany/NW-UBI-237/2021	U8	EPI_ISL_2466373	20B	2777777777777770	good	168	0	189	21	0	3	C241T,G1820A,T2959C,C3037T,C3373A,G3431T,C6883T,G8861A,C11956T,C12249T,C14408T,C14599T,G20134T,G21724A,A23403G,T25577C,C25626T,C27002T,G28881A,G28882A,G28883C	28003-28171		1-55,29769-29904		ChinaCDC_N_F:G28881A;G28882A;G28883C	N:R203K,N:G204R,ORF1a:G519S,ORF1a:D1036E,ORF1a:V1056L,ORF1a:V2866M,ORF1a:A3995V,ORF1b:P314L,ORF1b:V2223L,ORF3a:I62T,ORF8:C37S,S:D614G	12	ORF8:P38-,ORF8:I39-,ORF8:H40-,ORF8:F41-,ORF8:Y42-,ORF8:S43-,ORF8:K44-,ORF8:W45-,ORF8:Y46-,ORF8:I47-,ORF8:R48-,ORF8:V49-,ORF8:G50-,ORF8:A51-,ORF8:R52-,ORF8:K53-,ORF8:S54-,ORF8:A55-,ORF8:P56-,ORF8:L57-,ORF8:I58-,ORF8:E59-,ORF8:L60-,ORF8:C61-,ORF8:V62-,ORF8:D63-,ORF8:E64-,ORF8:A65-,ORF8:G66-,ORF8:S67-,ORF8:K68-,ORF8:S69-,ORF8:P70-,ORF8:I71-,ORF8:Q72-,ORF8:Y73-,ORF8:I74-,ORF8:D75-,ORF8:I76-,ORF8:G77-…	56	29902	89117	0	3000	0	good	189	10	0	good	0	24	4	good	12		0	good	0		B0184_60712235	1788
hCoV-19/Germany/NW-UBI-238/2021	U9	EPI_ISL_2466374	20B	2777777777777770	good	168	0	189	21	0	3	C241T,G1820A,T2959C,C3037T,C3373A,G3431T,C6883T,G8861A,C11956T,C12249T,C14408T,C14599T,G20134T,G21724A,A23403G,T25577C,C25626T,C27002T,G28881A,G28882A,G28883C	28003-28171		1-55,29769-29904		ChinaCDC_N_F:G28881A;G28882A;G28883C	N:R203K,N:G204R,ORF1a:G519S,ORF1a:D1036E,ORF1a:V1056L,ORF1a:V2866M,ORF1a:A3995V,ORF1b:P314L,ORF1b:V2223L,ORF3a:I62T,ORF8:C37S,S:D614G	12	ORF8:P38-,ORF8:I39-,ORF8:H40-,ORF8:F41-,ORF8:Y42-,ORF8:S43-,ORF8:K44-,ORF8:W45-,ORF8:Y46-,ORF8:I47-,ORF8:R48-,ORF8:V49-,ORF8:G50-,ORF8:A51-,ORF8:R52-,ORF8:K53-,ORF8:S54-,ORF8:A55-,ORF8:P56-,ORF8:L57-,ORF8:I58-,ORF8:E59-,ORF8:L60-,ORF8:C61-,ORF8:V62-,ORF8:D63-,ORF8:E64-,ORF8:A65-,ORF8:G66-,ORF8:S67-,ORF8:K68-,ORF8:S69-,ORF8:P70-,ORF8:I71-,ORF8:Q72-,ORF8:Y73-,ORF8:I74-,ORF8:D75-,ORF8:I76-,ORF8:G77-…	56	29902	89117	0	3000	0	good	189	10	0	good	0	24	4	good	12		0	good	0		B0186_60712738	1788
hCoV-19/Germany/NW-UBI-239/2021	D5	EPI_ISL_2466375	20B	15625	good	168	0	189	20	0	3	C241T,G1820A,T2959C,C3037T,C3373A,G3431T,C6883T,G8861A,C12249T,C14408T,C14599T,G20134T,G21724A,A23403G,T25577C,C25626T,C27002T,G28881A,G28882A,G28883C	28003-28171		1-55,29769-29904		ChinaCDC_N_F:G28881A;G28882A;G28883C	N:R203K,N:G204R,ORF1a:G519S,ORF1a:D1036E,ORF1a:V1056L,ORF1a:V2866M,ORF1a:A3995V,ORF1b:P314L,ORF1b:V2223L,ORF3a:I62T,ORF8:C37S,S:D614G	12	ORF8:P38-,ORF8:I39-,ORF8:H40-,ORF8:F41-,ORF8:Y42-,ORF8:S43-,ORF8:K44-,ORF8:W45-,ORF8:Y46-,ORF8:I47-,ORF8:R48-,ORF8:V49-,ORF8:G50-,ORF8:A51-,ORF8:R52-,ORF8:K53-,ORF8:S54-,ORF8:A55-,ORF8:P56-,ORF8:L57-,ORF8:I58-,ORF8:E59-,ORF8:L60-,ORF8:C61-,ORF8:V62-,ORF8:D63-,ORF8:E64-,ORF8:A65-,ORF8:G66-,ORF8:S67-,ORF8:K68-,ORF8:S69-,ORF8:P70-,ORF8:I71-,ORF8:Q72-,ORF8:Y73-,ORF8:I74-,ORF8:D75-,ORF8:I76-,ORF8:G77-…	56	29902	89121	0	3000	0	good	189	10	0	good	0	24	3	good	11		0	good	0		B0198_52425424	1788
hCoV-19/Germany/NW-UBI-240/2021	M1	EPI_ISL_2466376	20B	15625	good	168	0	189	20	0	3	C241T,G1820A,T2959C,C3037T,C3373A,G3431T,C6883T,G8861A,C12249T,C14408T,C14599T,G20134T,G21724A,A23403G,T25577C,C25626T,C27002T,G28881A,G28882A,G28883C	28003-28171		1-55,29769-29904		ChinaCDC_N_F:G28881A;G28882A;G28883C	N:R203K,N:G204R,ORF1a:G519S,ORF1a:D1036E,ORF1a:V1056L,ORF1a:V2866M,ORF1a:A3995V,ORF1b:P314L,ORF1b:V2223L,ORF3a:I62T,ORF8:C37S,S:D614G	12	ORF8:P38-,ORF8:I39-,ORF8:H40-,ORF8:F41-,ORF8:Y42-,ORF8:S43-,ORF8:K44-,ORF8:W45-,ORF8:Y46-,ORF8:I47-,ORF8:R48-,ORF8:V49-,ORF8:G50-,ORF8:A51-,ORF8:R52-,ORF8:K53-,ORF8:S54-,ORF8:A55-,ORF8:P56-,ORF8:L57-,ORF8:I58-,ORF8:E59-,ORF8:L60-,ORF8:C61-,ORF8:V62-,ORF8:D63-,ORF8:E64-,ORF8:A65-,ORF8:G66-,ORF8:S67-,ORF8:K68-,ORF8:S69-,ORF8:P70-,ORF8:I71-,ORF8:Q72-,ORF8:Y73-,ORF8:I74-,ORF8:D75-,ORF8:I76-,ORF8:G77-…	56	29902	89121	0	3000	0	good	189	10	0	good	0	24	3	good	11		0	good	0		B0213_60716213	1788
hCoV-19/Germany/NW-UBI-241/2021	M2	EPI_ISL_2466377	20B	2777777777777770	good	168	0	189	21	0	3	C241T,G1820A,T2959C,C3037T,C3373A,G3431T,C6883T,G8861A,C10156T,C12249T,C14408T,C14599T,G20134T,G21724A,A23403G,T25577C,C25626T,C27002T,G28881A,G28882A,G28883C	28003-28171		1-55,29769-29904		ChinaCDC_N_F:G28881A;G28882A;G28883C	N:R203K,N:G204R,ORF1a:G519S,ORF1a:D1036E,ORF1a:V1056L,ORF1a:V2866M,ORF1a:A3995V,ORF1b:P314L,ORF1b:V2223L,ORF3a:I62T,ORF8:C37S,S:D614G	12	ORF8:P38-,ORF8:I39-,ORF8:H40-,ORF8:F41-,ORF8:Y42-,ORF8:S43-,ORF8:K44-,ORF8:W45-,ORF8:Y46-,ORF8:I47-,ORF8:R48-,ORF8:V49-,ORF8:G50-,ORF8:A51-,ORF8:R52-,ORF8:K53-,ORF8:S54-,ORF8:A55-,ORF8:P56-,ORF8:L57-,ORF8:I58-,ORF8:E59-,ORF8:L60-,ORF8:C61-,ORF8:V62-,ORF8:D63-,ORF8:E64-,ORF8:A65-,ORF8:G66-,ORF8:S67-,ORF8:K68-,ORF8:S69-,ORF8:P70-,ORF8:I71-,ORF8:Q72-,ORF8:Y73-,ORF8:I74-,ORF8:D75-,ORF8:I76-,ORF8:G77-…	56	29902	89117	0	3000	0	good	189	10	0	good	0	24	4	good	12		0	good	0		B0221_60720374	1788
hCoV-19/Germany/NW-UBI-242/2021	M3	EPI_ISL_2466661	20B	2777777777777770	good	169	0	190	20	0	3	C241T,G1820A,T2959C,C3037T,C3373A,G3431T,C6883T,G8861A,C10156T,C14408T,C14599T,G20134T,G21724A,A23403G,T25577C,C25626T,C27002T,G28881A,G28882A,G28883C	17140,28003-28171		1-55,12249,29769-29904		ChinaCDC_N_F:G28881A;G28882A;G28883C	N:R203K,N:G204R,ORF1a:G519S,ORF1a:D1036E,ORF1a:V1056L,ORF1a:V2866M,ORF1b:P314L,ORF1b:A1225X,ORF1b:V2223L,ORF3a:I62T,ORF8:C37S,S:D614G	12	ORF8:P38-,ORF8:I39-,ORF8:H40-,ORF8:F41-,ORF8:Y42-,ORF8:S43-,ORF8:K44-,ORF8:W45-,ORF8:Y46-,ORF8:I47-,ORF8:R48-,ORF8:V49-,ORF8:G50-,ORF8:A51-,ORF8:R52-,ORF8:K53-,ORF8:S54-,ORF8:A55-,ORF8:P56-,ORF8:L57-,ORF8:I58-,ORF8:E59-,ORF8:L60-,ORF8:C61-,ORF8:V62-,ORF8:D63-,ORF8:E64-,ORF8:A65-,ORF8:G66-,ORF8:S67-,ORF8:K68-,ORF8:S69-,ORF8:P70-,ORF8:I71-,ORF8:Q72-,ORF8:Y73-,ORF8:I74-,ORF8:D75-,ORF8:I76-,ORF8:G77-…	56	29902	89114	0	3000	0	good	190	10	0	good	0	24	4	good	12		0	good	0		B0228_60723595 (29.734 bp)	1788
hCoV-19/Germany/NW-UBI-243/2021	M4	EPI_ISL_2466378	20B	2777777777777770	good	168	0	189	21	0	3	C241T,G1820A,T2959C,C3037T,C3373A,G3431T,C6883T,G8861A,C10156T,C12249T,C14408T,C14599T,G20134T,G21724A,A23403G,T25577C,C25626T,C27002T,G28881A,G28882A,G28883C	28003-28171		1-55,29769-29904		ChinaCDC_N_F:G28881A;G28882A;G28883C	N:R203K,N:G204R,ORF1a:G519S,ORF1a:D1036E,ORF1a:V1056L,ORF1a:V2866M,ORF1a:A3995V,ORF1b:P314L,ORF1b:V2223L,ORF3a:I62T,ORF8:C37S,S:D614G	12	ORF8:P38-,ORF8:I39-,ORF8:H40-,ORF8:F41-,ORF8:Y42-,ORF8:S43-,ORF8:K44-,ORF8:W45-,ORF8:Y46-,ORF8:I47-,ORF8:R48-,ORF8:V49-,ORF8:G50-,ORF8:A51-,ORF8:R52-,ORF8:K53-,ORF8:S54-,ORF8:A55-,ORF8:P56-,ORF8:L57-,ORF8:I58-,ORF8:E59-,ORF8:L60-,ORF8:C61-,ORF8:V62-,ORF8:D63-,ORF8:E64-,ORF8:A65-,ORF8:G66-,ORF8:S67-,ORF8:K68-,ORF8:S69-,ORF8:P70-,ORF8:I71-,ORF8:Q72-,ORF8:Y73-,ORF8:I74-,ORF8:D75-,ORF8:I76-,ORF8:G77-…	56	29902	89117	0	3000	0	good	189	10	0	good	0	24	4	good	12		0	good	0		B0231_60723902	1788
hCoV-19/Germany/NW-UBI-244/2021	M5	EPI_ISL_2466379	20B	15625	good	168	0	189	20	0	3	C241T,G1820A,T2959C,C3037T,C3373A,G3431T,C6883T,G8861A,C12249T,C14408T,C14599T,G20134T,G21724A,A23403G,T25577C,C25626T,C27002T,G28881A,G28882A,G28883C	28003-28171		1-55,29769-29904		ChinaCDC_N_F:G28881A;G28882A;G28883C	N:R203K,N:G204R,ORF1a:G519S,ORF1a:D1036E,ORF1a:V1056L,ORF1a:V2866M,ORF1a:A3995V,ORF1b:P314L,ORF1b:V2223L,ORF3a:I62T,ORF8:C37S,S:D614G	12	ORF8:P38-,ORF8:I39-,ORF8:H40-,ORF8:F41-,ORF8:Y42-,ORF8:S43-,ORF8:K44-,ORF8:W45-,ORF8:Y46-,ORF8:I47-,ORF8:R48-,ORF8:V49-,ORF8:G50-,ORF8:A51-,ORF8:R52-,ORF8:K53-,ORF8:S54-,ORF8:A55-,ORF8:P56-,ORF8:L57-,ORF8:I58-,ORF8:E59-,ORF8:L60-,ORF8:C61-,ORF8:V62-,ORF8:D63-,ORF8:E64-,ORF8:A65-,ORF8:G66-,ORF8:S67-,ORF8:K68-,ORF8:S69-,ORF8:P70-,ORF8:I71-,ORF8:Q72-,ORF8:Y73-,ORF8:I74-,ORF8:D75-,ORF8:I76-,ORF8:G77-…	56	29902	89121	0	3000	0	good	189	10	0	good	0	24	3	good	11		0	good	0		B0236_60724829	1788
hCoV-19/Germany/NW-UBI-245/2021	M6	EPI_ISL_2466380	20B	2777777777777770	good	168	0	189	21	0	3	C241T,G1820A,T2959C,C3037T,C3373A,G3431T,C6883T,G8861A,C10156T,C12249T,C14408T,C14599T,G20134T,G21724A,A23403G,T25577C,C25626T,C27002T,G28881A,G28882A,G28883C	28003-28171		1-55,29769-29904		ChinaCDC_N_F:G28881A;G28882A;G28883C	N:R203K,N:G204R,ORF1a:G519S,ORF1a:D1036E,ORF1a:V1056L,ORF1a:V2866M,ORF1a:A3995V,ORF1b:P314L,ORF1b:V2223L,ORF3a:I62T,ORF8:C37S,S:D614G	12	ORF8:P38-,ORF8:I39-,ORF8:H40-,ORF8:F41-,ORF8:Y42-,ORF8:S43-,ORF8:K44-,ORF8:W45-,ORF8:Y46-,ORF8:I47-,ORF8:R48-,ORF8:V49-,ORF8:G50-,ORF8:A51-,ORF8:R52-,ORF8:K53-,ORF8:S54-,ORF8:A55-,ORF8:P56-,ORF8:L57-,ORF8:I58-,ORF8:E59-,ORF8:L60-,ORF8:C61-,ORF8:V62-,ORF8:D63-,ORF8:E64-,ORF8:A65-,ORF8:G66-,ORF8:S67-,ORF8:K68-,ORF8:S69-,ORF8:P70-,ORF8:I71-,ORF8:Q72-,ORF8:Y73-,ORF8:I74-,ORF8:D75-,ORF8:I76-,ORF8:G77-…	56	29902	89117	0	3000	0	good	189	10	0	good	0	24	4	good	12		0	good	0		B0237_60724960	1788
hCoV-19/Germany/NW-UBI-246/2021	M7	EPI_ISL_2466381	20B	2777777777777770	good	168	0	189	21	0	3	C241T,G1820A,T2959C,C3037T,C3373A,G3431T,C6883T,G8861A,C10156T,C12249T,C14408T,C14599T,G20134T,G21724A,A23403G,T25577C,C25626T,C27002T,G28881A,G28882A,G28883C	28003-28171		1-55,29769-29904		ChinaCDC_N_F:G28881A;G28882A;G28883C	N:R203K,N:G204R,ORF1a:G519S,ORF1a:D1036E,ORF1a:V1056L,ORF1a:V2866M,ORF1a:A3995V,ORF1b:P314L,ORF1b:V2223L,ORF3a:I62T,ORF8:C37S,S:D614G	12	ORF8:P38-,ORF8:I39-,ORF8:H40-,ORF8:F41-,ORF8:Y42-,ORF8:S43-,ORF8:K44-,ORF8:W45-,ORF8:Y46-,ORF8:I47-,ORF8:R48-,ORF8:V49-,ORF8:G50-,ORF8:A51-,ORF8:R52-,ORF8:K53-,ORF8:S54-,ORF8:A55-,ORF8:P56-,ORF8:L57-,ORF8:I58-,ORF8:E59-,ORF8:L60-,ORF8:C61-,ORF8:V62-,ORF8:D63-,ORF8:E64-,ORF8:A65-,ORF8:G66-,ORF8:S67-,ORF8:K68-,ORF8:S69-,ORF8:P70-,ORF8:I71-,ORF8:Q72-,ORF8:Y73-,ORF8:I74-,ORF8:D75-,ORF8:I76-,ORF8:G77-…	56	29902	89117	0	3000	0	good	189	10	0	good	0	24	4	good	12		0	good	0		B0242_60726182	1788
hCoV-19/Germany/NW-UBI-247/2021	M8	EPI_ISL_2466382	20B	2777777777777770	good	168	0	189	21	0	3	C241T,G1820A,T2959C,C3037T,C3373A,G3431T,C6883T,G8861A,C10156T,C12249T,C14408T,C14599T,G20134T,G21724A,A23403G,T25577C,C25626T,C27002T,G28881A,G28882A,G28883C	28003-28171		1-55,29769-29904		ChinaCDC_N_F:G28881A;G28882A;G28883C	N:R203K,N:G204R,ORF1a:G519S,ORF1a:D1036E,ORF1a:V1056L,ORF1a:V2866M,ORF1a:A3995V,ORF1b:P314L,ORF1b:V2223L,ORF3a:I62T,ORF8:C37S,S:D614G	12	ORF8:P38-,ORF8:I39-,ORF8:H40-,ORF8:F41-,ORF8:Y42-,ORF8:S43-,ORF8:K44-,ORF8:W45-,ORF8:Y46-,ORF8:I47-,ORF8:R48-,ORF8:V49-,ORF8:G50-,ORF8:A51-,ORF8:R52-,ORF8:K53-,ORF8:S54-,ORF8:A55-,ORF8:P56-,ORF8:L57-,ORF8:I58-,ORF8:E59-,ORF8:L60-,ORF8:C61-,ORF8:V62-,ORF8:D63-,ORF8:E64-,ORF8:A65-,ORF8:G66-,ORF8:S67-,ORF8:K68-,ORF8:S69-,ORF8:P70-,ORF8:I71-,ORF8:Q72-,ORF8:Y73-,ORF8:I74-,ORF8:D75-,ORF8:I76-,ORF8:G77-…	56	29902	89117	0	3000	0	good	189	10	0	good	0	24	4	good	12		0	good	0		B0243_60726189	1788
hCoV-19/Germany/NW-UBI-248/2021	M9	EPI_ISL_2466383	20B	2777777777777770	good	168	0	189	21	0	3	C241T,G1820A,T2959C,C3037T,C3373A,G3431T,C6883T,G8861A,C10156T,C12249T,C14408T,C14599T,G20134T,G21724A,A23403G,T25577C,C25626T,C27002T,G28881A,G28882A,G28883C	28003-28171		1-55,29769-29904		ChinaCDC_N_F:G28881A;G28882A;G28883C	N:R203K,N:G204R,ORF1a:G519S,ORF1a:D1036E,ORF1a:V1056L,ORF1a:V2866M,ORF1a:A3995V,ORF1b:P314L,ORF1b:V2223L,ORF3a:I62T,ORF8:C37S,S:D614G	12	ORF8:P38-,ORF8:I39-,ORF8:H40-,ORF8:F41-,ORF8:Y42-,ORF8:S43-,ORF8:K44-,ORF8:W45-,ORF8:Y46-,ORF8:I47-,ORF8:R48-,ORF8:V49-,ORF8:G50-,ORF8:A51-,ORF8:R52-,ORF8:K53-,ORF8:S54-,ORF8:A55-,ORF8:P56-,ORF8:L57-,ORF8:I58-,ORF8:E59-,ORF8:L60-,ORF8:C61-,ORF8:V62-,ORF8:D63-,ORF8:E64-,ORF8:A65-,ORF8:G66-,ORF8:S67-,ORF8:K68-,ORF8:S69-,ORF8:P70-,ORF8:I71-,ORF8:Q72-,ORF8:Y73-,ORF8:I74-,ORF8:D75-,ORF8:I76-,ORF8:G77-…	56	29902	89117	0	3000	0	good	189	10	0	good	0	24	4	good	12		0	good	0		B0249_60728361	1788
hCoV-19/Germany/NW-UBI-249/2021	M11	EPI_ISL_2466384	20B	2777777777777770	good	168	0	189	21	0	3	C241T,G1820A,T2959C,C3037T,C3373A,G3431T,C6883T,G8861A,C10156T,C12249T,C14408T,C14599T,G20134T,G21724A,A23403G,T25577C,C25626T,C27002T,G28881A,G28882A,G28883C	28003-28171		1-55,29769-29904		ChinaCDC_N_F:G28881A;G28882A;G28883C	N:R203K,N:G204R,ORF1a:G519S,ORF1a:D1036E,ORF1a:V1056L,ORF1a:V2866M,ORF1a:A3995V,ORF1b:P314L,ORF1b:V2223L,ORF3a:I62T,ORF8:C37S,S:D614G	12	ORF8:P38-,ORF8:I39-,ORF8:H40-,ORF8:F41-,ORF8:Y42-,ORF8:S43-,ORF8:K44-,ORF8:W45-,ORF8:Y46-,ORF8:I47-,ORF8:R48-,ORF8:V49-,ORF8:G50-,ORF8:A51-,ORF8:R52-,ORF8:K53-,ORF8:S54-,ORF8:A55-,ORF8:P56-,ORF8:L57-,ORF8:I58-,ORF8:E59-,ORF8:L60-,ORF8:C61-,ORF8:V62-,ORF8:D63-,ORF8:E64-,ORF8:A65-,ORF8:G66-,ORF8:S67-,ORF8:K68-,ORF8:S69-,ORF8:P70-,ORF8:I71-,ORF8:Q72-,ORF8:Y73-,ORF8:I74-,ORF8:D75-,ORF8:I76-,ORF8:G77-…	56	29902	89117	0	3000	0	good	189	10	0	good	0	24	4	good	12		0	good	0		B0260_60730076	1788
hCoV-19/Germany/NW-UBI-250/2021	M12	EPI_ISL_2466385	20B	2777777777777770	good	168	0	189	21	0	3	C241T,G1820A,T2959C,C3037T,C3373A,G3431T,C6883T,G8861A,C10156T,C12249T,C14408T,C14599T,G20134T,G21724A,A23403G,T25577C,C25626T,C27002T,G28881A,G28882A,G28883C	28003-28171		1-55,29769-29904		ChinaCDC_N_F:G28881A;G28882A;G28883C	N:R203K,N:G204R,ORF1a:G519S,ORF1a:D1036E,ORF1a:V1056L,ORF1a:V2866M,ORF1a:A3995V,ORF1b:P314L,ORF1b:V2223L,ORF3a:I62T,ORF8:C37S,S:D614G	12	ORF8:P38-,ORF8:I39-,ORF8:H40-,ORF8:F41-,ORF8:Y42-,ORF8:S43-,ORF8:K44-,ORF8:W45-,ORF8:Y46-,ORF8:I47-,ORF8:R48-,ORF8:V49-,ORF8:G50-,ORF8:A51-,ORF8:R52-,ORF8:K53-,ORF8:S54-,ORF8:A55-,ORF8:P56-,ORF8:L57-,ORF8:I58-,ORF8:E59-,ORF8:L60-,ORF8:C61-,ORF8:V62-,ORF8:D63-,ORF8:E64-,ORF8:A65-,ORF8:G66-,ORF8:S67-,ORF8:K68-,ORF8:S69-,ORF8:P70-,ORF8:I71-,ORF8:Q72-,ORF8:Y73-,ORF8:I74-,ORF8:D75-,ORF8:I76-,ORF8:G77-…	56	29902	89117	0	3000	0	good	189	10	0	good	0	24	4	good	12		0	good	0		B0262_60730074	1788
hCoV-19/Germany/NW-UBI-251/2021	M10	EPI_ISL_2466386	20B	2777777777777770	good	168	0	189	21	0	3	C241T,G1820A,T2959C,C3037T,C3373A,G3431T,C6883T,G8861A,C10156T,C12249T,C14408T,C14599T,G20134T,G21724A,A23403G,T25577C,C25626T,C27002T,G28881A,G28882A,G28883C	28003-28171		1-55,29769-29904		ChinaCDC_N_F:G28881A;G28882A;G28883C	N:R203K,N:G204R,ORF1a:G519S,ORF1a:D1036E,ORF1a:V1056L,ORF1a:V2866M,ORF1a:A3995V,ORF1b:P314L,ORF1b:V2223L,ORF3a:I62T,ORF8:C37S,S:D614G	12	ORF8:P38-,ORF8:I39-,ORF8:H40-,ORF8:F41-,ORF8:Y42-,ORF8:S43-,ORF8:K44-,ORF8:W45-,ORF8:Y46-,ORF8:I47-,ORF8:R48-,ORF8:V49-,ORF8:G50-,ORF8:A51-,ORF8:R52-,ORF8:K53-,ORF8:S54-,ORF8:A55-,ORF8:P56-,ORF8:L57-,ORF8:I58-,ORF8:E59-,ORF8:L60-,ORF8:C61-,ORF8:V62-,ORF8:D63-,ORF8:E64-,ORF8:A65-,ORF8:G66-,ORF8:S67-,ORF8:K68-,ORF8:S69-,ORF8:P70-,ORF8:I71-,ORF8:Q72-,ORF8:Y73-,ORF8:I74-,ORF8:D75-,ORF8:I76-,ORF8:G77-…	56	29902	89117	0	3000	0	good	189	10	0	good	0	24	4	good	12		0	good	0		B0263_60730828	1788
hCoV-19/Germany/NW-UBI-252/2021	M13	EPI_ISL_2466387	20B	4340277777777770	good	168	0	189	22	0	3	C241T,G1820A,T2959C,C3037T,C3373A,G3431T,C6883T,G8861A,C10156T,C12249T,C14408T,C14599T,C17894T,G20134T,G21724A,A23403G,T25577C,C25626T,C27002T,G28881A,G28882A,G28883C	28003-28171		1-55,29769-29904		ChinaCDC_N_F:G28881A;G28882A;G28883C	N:R203K,N:G204R,ORF1a:G519S,ORF1a:D1036E,ORF1a:V1056L,ORF1a:V2866M,ORF1a:A3995V,ORF1b:P314L,ORF1b:A1476V,ORF1b:V2223L,ORF3a:I62T,ORF8:C37S,S:D614G	13	ORF8:P38-,ORF8:I39-,ORF8:H40-,ORF8:F41-,ORF8:Y42-,ORF8:S43-,ORF8:K44-,ORF8:W45-,ORF8:Y46-,ORF8:I47-,ORF8:R48-,ORF8:V49-,ORF8:G50-,ORF8:A51-,ORF8:R52-,ORF8:K53-,ORF8:S54-,ORF8:A55-,ORF8:P56-,ORF8:L57-,ORF8:I58-,ORF8:E59-,ORF8:L60-,ORF8:C61-,ORF8:V62-,ORF8:D63-,ORF8:E64-,ORF8:A65-,ORF8:G66-,ORF8:S67-,ORF8:K68-,ORF8:S69-,ORF8:P70-,ORF8:I71-,ORF8:Q72-,ORF8:Y73-,ORF8:I74-,ORF8:D75-,ORF8:I76-,ORF8:G77-…	56	29902	89113	0	3000	0	good	189	10	0	good	0	24	5	good	13		0	good	0		B0267_60732374	1788
hCoV-19/Germany/NW-UBI-253/2021	G3	EPI_ISL_2466388	20B	4340277777777770	good	168	0	189	22	0	3	C241T,G1820A,T2959C,C3037T,C3373A,G3431T,C6883T,G8861A,C10156T,C12249T,G13966A,C14408T,C14599T,G20134T,G21724A,A23403G,T25577C,C25626T,C27002T,G28881A,G28882A,G28883C	28003-28171		1-55,29769-29904		ChinaCDC_N_F:G28881A;G28882A;G28883C	N:R203K,N:G204R,ORF1a:G519S,ORF1a:D1036E,ORF1a:V1056L,ORF1a:V2866M,ORF1a:A3995V,ORF1b:A167T,ORF1b:P314L,ORF1b:V2223L,ORF3a:I62T,ORF8:C37S,S:D614G	13	ORF8:P38-,ORF8:I39-,ORF8:H40-,ORF8:F41-,ORF8:Y42-,ORF8:S43-,ORF8:K44-,ORF8:W45-,ORF8:Y46-,ORF8:I47-,ORF8:R48-,ORF8:V49-,ORF8:G50-,ORF8:A51-,ORF8:R52-,ORF8:K53-,ORF8:S54-,ORF8:A55-,ORF8:P56-,ORF8:L57-,ORF8:I58-,ORF8:E59-,ORF8:L60-,ORF8:C61-,ORF8:V62-,ORF8:D63-,ORF8:E64-,ORF8:A65-,ORF8:G66-,ORF8:S67-,ORF8:K68-,ORF8:S69-,ORF8:P70-,ORF8:I71-,ORF8:Q72-,ORF8:Y73-,ORF8:I74-,ORF8:D75-,ORF8:I76-,ORF8:G77-…	56	29902	89113	0	3000	0	good	189	10	0	good	0	24	5	good	13		0	good	0		B0269_60732539	1788
hCoV-19/Germany/NW-UBI-254/2021	G1	EPI_ISL_2466389	20B	4340277777777770	good	168	0	189	22	0	3	C241T,G1820A,T2959C,C3037T,C3373A,G3431T,C6883T,G8861A,C10156T,C12249T,G13966A,C14408T,C14599T,G20134T,G21724A,A23403G,T25577C,C25626T,C27002T,G28881A,G28882A,G28883C	28003-28171		1-55,29769-29904		ChinaCDC_N_F:G28881A;G28882A;G28883C	N:R203K,N:G204R,ORF1a:G519S,ORF1a:D1036E,ORF1a:V1056L,ORF1a:V2866M,ORF1a:A3995V,ORF1b:A167T,ORF1b:P314L,ORF1b:V2223L,ORF3a:I62T,ORF8:C37S,S:D614G	13	ORF8:P38-,ORF8:I39-,ORF8:H40-,ORF8:F41-,ORF8:Y42-,ORF8:S43-,ORF8:K44-,ORF8:W45-,ORF8:Y46-,ORF8:I47-,ORF8:R48-,ORF8:V49-,ORF8:G50-,ORF8:A51-,ORF8:R52-,ORF8:K53-,ORF8:S54-,ORF8:A55-,ORF8:P56-,ORF8:L57-,ORF8:I58-,ORF8:E59-,ORF8:L60-,ORF8:C61-,ORF8:V62-,ORF8:D63-,ORF8:E64-,ORF8:A65-,ORF8:G66-,ORF8:S67-,ORF8:K68-,ORF8:S69-,ORF8:P70-,ORF8:I71-,ORF8:Q72-,ORF8:Y73-,ORF8:I74-,ORF8:D75-,ORF8:I76-,ORF8:G77-…	56	29902	89113	0	3000	0	good	189	10	0	good	0	24	5	good	13		0	good	0		B0270_60733669	1788
hCoV-19/Germany/NW-UBI-255/2021	G4	EPI_ISL_2466390	20B	4340277777777770	good	168	0	189	22	0	3	C241T,G1820A,T2959C,C3037T,C3373A,G3431T,C6883T,G8861A,C10156T,C12249T,G13966A,C14408T,C14599T,G20134T,G21724A,A23403G,T25577C,C25626T,C27002T,G28881A,G28882A,G28883C	28003-28171		1-55,29769-29904		ChinaCDC_N_F:G28881A;G28882A;G28883C	N:R203K,N:G204R,ORF1a:G519S,ORF1a:D1036E,ORF1a:V1056L,ORF1a:V2866M,ORF1a:A3995V,ORF1b:A167T,ORF1b:P314L,ORF1b:V2223L,ORF3a:I62T,ORF8:C37S,S:D614G	13	ORF8:P38-,ORF8:I39-,ORF8:H40-,ORF8:F41-,ORF8:Y42-,ORF8:S43-,ORF8:K44-,ORF8:W45-,ORF8:Y46-,ORF8:I47-,ORF8:R48-,ORF8:V49-,ORF8:G50-,ORF8:A51-,ORF8:R52-,ORF8:K53-,ORF8:S54-,ORF8:A55-,ORF8:P56-,ORF8:L57-,ORF8:I58-,ORF8:E59-,ORF8:L60-,ORF8:C61-,ORF8:V62-,ORF8:D63-,ORF8:E64-,ORF8:A65-,ORF8:G66-,ORF8:S67-,ORF8:K68-,ORF8:S69-,ORF8:P70-,ORF8:I71-,ORF8:Q72-,ORF8:Y73-,ORF8:I74-,ORF8:D75-,ORF8:I76-,ORF8:G77-…	56	29902	89113	0	3000	0	good	189	10	0	good	0	24	5	good	13		0	good	0		B0271_60733284	1788
hCoV-19/Germany/NW-UBI-256/2021	M15	EPI_ISL_2466391	20B	4340277777777770	good	168	0	189	22	0	3	C241T,G1820A,T2959C,C3037T,C3373A,G3431T,C6883T,G8861A,C10156T,C12249T,G13966A,C14408T,C14599T,G20134T,G21724A,A23403G,T25577C,C25626T,C27002T,G28881A,G28882A,G28883C	28003-28171		1-55,29769-29904		ChinaCDC_N_F:G28881A;G28882A;G28883C	N:R203K,N:G204R,ORF1a:G519S,ORF1a:D1036E,ORF1a:V1056L,ORF1a:V2866M,ORF1a:A3995V,ORF1b:A167T,ORF1b:P314L,ORF1b:V2223L,ORF3a:I62T,ORF8:C37S,S:D614G	13	ORF8:P38-,ORF8:I39-,ORF8:H40-,ORF8:F41-,ORF8:Y42-,ORF8:S43-,ORF8:K44-,ORF8:W45-,ORF8:Y46-,ORF8:I47-,ORF8:R48-,ORF8:V49-,ORF8:G50-,ORF8:A51-,ORF8:R52-,ORF8:K53-,ORF8:S54-,ORF8:A55-,ORF8:P56-,ORF8:L57-,ORF8:I58-,ORF8:E59-,ORF8:L60-,ORF8:C61-,ORF8:V62-,ORF8:D63-,ORF8:E64-,ORF8:A65-,ORF8:G66-,ORF8:S67-,ORF8:K68-,ORF8:S69-,ORF8:P70-,ORF8:I71-,ORF8:Q72-,ORF8:Y73-,ORF8:I74-,ORF8:D75-,ORF8:I76-,ORF8:G77-…	56	29902	89113	0	3000	0	good	189	10	0	good	0	24	5	good	13		0	good	0		B0272_60734106	1788
hCoV-19/Germany/NW-UBI-257/2021	M14	EPI_ISL_2466392	20B	2777777777777770	good	168	0	189	21	0	3	C241T,G1820A,T2959C,C3037T,C3373A,G3431T,C6883T,G8861A,C10156T,C12249T,C14408T,C14599T,G20134T,G21724A,A23403G,T25577C,C25626T,C27002T,G28881A,G28882A,G28883C	28003-28171		1-55,29769-29904		ChinaCDC_N_F:G28881A;G28882A;G28883C	N:R203K,N:G204R,ORF1a:G519S,ORF1a:D1036E,ORF1a:V1056L,ORF1a:V2866M,ORF1a:A3995V,ORF1b:P314L,ORF1b:V2223L,ORF3a:I62T,ORF8:C37S,S:D614G	12	ORF8:P38-,ORF8:I39-,ORF8:H40-,ORF8:F41-,ORF8:Y42-,ORF8:S43-,ORF8:K44-,ORF8:W45-,ORF8:Y46-,ORF8:I47-,ORF8:R48-,ORF8:V49-,ORF8:G50-,ORF8:A51-,ORF8:R52-,ORF8:K53-,ORF8:S54-,ORF8:A55-,ORF8:P56-,ORF8:L57-,ORF8:I58-,ORF8:E59-,ORF8:L60-,ORF8:C61-,ORF8:V62-,ORF8:D63-,ORF8:E64-,ORF8:A65-,ORF8:G66-,ORF8:S67-,ORF8:K68-,ORF8:S69-,ORF8:P70-,ORF8:I71-,ORF8:Q72-,ORF8:Y73-,ORF8:I74-,ORF8:D75-,ORF8:I76-,ORF8:G77-…	56	29902	89117	0	3000	0	good	189	10	0	good	0	24	4	good	12		0	good	0		B0273_52436282	1788
hCoV-19/Germany/NW-UBI-258/2021	D6	EPI_ISL_2466393	20B	4340277777777770	good	168	0	189	22	0	3	C241T,G1820A,T2959C,C3037T,C3373A,G3431T,C6883T,G8861A,C10156T,C12249T,C14408T,C14599T,G20134T,A21366G,G21724A,A23403G,T25577C,C25626T,C27002T,G28881A,G28882A,G28883C	28003-28171		1-55,29769-29904		ChinaCDC_N_F:G28881A;G28882A;G28883C	N:R203K,N:G204R,ORF1a:G519S,ORF1a:D1036E,ORF1a:V1056L,ORF1a:V2866M,ORF1a:A3995V,ORF1b:P314L,ORF1b:V2223L,ORF3a:I62T,ORF8:C37S,S:D614G	12	ORF8:P38-,ORF8:I39-,ORF8:H40-,ORF8:F41-,ORF8:Y42-,ORF8:S43-,ORF8:K44-,ORF8:W45-,ORF8:Y46-,ORF8:I47-,ORF8:R48-,ORF8:V49-,ORF8:G50-,ORF8:A51-,ORF8:R52-,ORF8:K53-,ORF8:S54-,ORF8:A55-,ORF8:P56-,ORF8:L57-,ORF8:I58-,ORF8:E59-,ORF8:L60-,ORF8:C61-,ORF8:V62-,ORF8:D63-,ORF8:E64-,ORF8:A65-,ORF8:G66-,ORF8:S67-,ORF8:K68-,ORF8:S69-,ORF8:P70-,ORF8:I71-,ORF8:Q72-,ORF8:Y73-,ORF8:I74-,ORF8:D75-,ORF8:I76-,ORF8:G77-…	56	29902	89113	0	3000	0	good	189	10	0	good	0	24	5	good	13		0	good	0		B0274_60733864	1788
hCoV-19/Germany/NW-UBI-259/2021	G5	EPI_ISL_2466394	20B	4340277777777770	good	168	0	189	22	0	3	C241T,G1820A,T2959C,C3037T,C3373A,G3431T,C6883T,G8861A,C10156T,C12249T,G13966A,C14408T,C14599T,G20134T,G21724A,A23403G,T25577C,C25626T,C27002T,G28881A,G28882A,G28883C	28003-28171		1-55,29769-29904		ChinaCDC_N_F:G28881A;G28882A;G28883C	N:R203K,N:G204R,ORF1a:G519S,ORF1a:D1036E,ORF1a:V1056L,ORF1a:V2866M,ORF1a:A3995V,ORF1b:A167T,ORF1b:P314L,ORF1b:V2223L,ORF3a:I62T,ORF8:C37S,S:D614G	13	ORF8:P38-,ORF8:I39-,ORF8:H40-,ORF8:F41-,ORF8:Y42-,ORF8:S43-,ORF8:K44-,ORF8:W45-,ORF8:Y46-,ORF8:I47-,ORF8:R48-,ORF8:V49-,ORF8:G50-,ORF8:A51-,ORF8:R52-,ORF8:K53-,ORF8:S54-,ORF8:A55-,ORF8:P56-,ORF8:L57-,ORF8:I58-,ORF8:E59-,ORF8:L60-,ORF8:C61-,ORF8:V62-,ORF8:D63-,ORF8:E64-,ORF8:A65-,ORF8:G66-,ORF8:S67-,ORF8:K68-,ORF8:S69-,ORF8:P70-,ORF8:I71-,ORF8:Q72-,ORF8:Y73-,ORF8:I74-,ORF8:D75-,ORF8:I76-,ORF8:G77-…	56	29902	89113	0	3000	0	good	189	10	0	good	0	24	5	good	13		0	good	0		B0275_60733278	1788
hCoV-19/Germany/NW-UBI-260/2021	G6	EPI_ISL_2466395	20B	45809	good	168	0	189	23	0	3	C241T,C1385T,G1820A,T2959C,C3037T,C3373A,G3431T,C6883T,G8861A,C10156T,C12249T,G13966A,C14408T,C14599T,G20134T,G21724A,A23403G,T25577C,C25626T,C27002T,G28881A,G28882A,G28883C	28003-28171		1-55,29769-29904		ChinaCDC_N_F:G28881A;G28882A;G28883C	N:R203K,N:G204R,ORF1a:H374Y,ORF1a:G519S,ORF1a:D1036E,ORF1a:V1056L,ORF1a:V2866M,ORF1a:A3995V,ORF1b:A167T,ORF1b:P314L,ORF1b:V2223L,ORF3a:I62T,ORF8:C37S,S:D614G	14	ORF8:P38-,ORF8:I39-,ORF8:H40-,ORF8:F41-,ORF8:Y42-,ORF8:S43-,ORF8:K44-,ORF8:W45-,ORF8:Y46-,ORF8:I47-,ORF8:R48-,ORF8:V49-,ORF8:G50-,ORF8:A51-,ORF8:R52-,ORF8:K53-,ORF8:S54-,ORF8:A55-,ORF8:P56-,ORF8:L57-,ORF8:I58-,ORF8:E59-,ORF8:L60-,ORF8:C61-,ORF8:V62-,ORF8:D63-,ORF8:E64-,ORF8:A65-,ORF8:G66-,ORF8:S67-,ORF8:K68-,ORF8:S69-,ORF8:P70-,ORF8:I71-,ORF8:Q72-,ORF8:Y73-,ORF8:I74-,ORF8:D75-,ORF8:I76-,ORF8:G77-…	56	29902	89109	0	3000	0	good	189	10	0	good	0	24	6	good	14		0	good	0		B0277_60735467	1788
hCoV-19/Germany/NW-UBI-261/2021	G7	EPI_ISL_2466396	20B	45809	good	168	0	189	23	0	3	C241T,C1385T,G1820A,T2959C,C3037T,C3373A,G3431T,C6883T,G8861A,C10156T,C12249T,G13966A,C14408T,C14599T,G20134T,G21724A,A23403G,T25577C,C25626T,C27002T,G28881A,G28882A,G28883C	28003-28171		1-55,29769-29904		ChinaCDC_N_F:G28881A;G28882A;G28883C	N:R203K,N:G204R,ORF1a:H374Y,ORF1a:G519S,ORF1a:D1036E,ORF1a:V1056L,ORF1a:V2866M,ORF1a:A3995V,ORF1b:A167T,ORF1b:P314L,ORF1b:V2223L,ORF3a:I62T,ORF8:C37S,S:D614G	14	ORF8:P38-,ORF8:I39-,ORF8:H40-,ORF8:F41-,ORF8:Y42-,ORF8:S43-,ORF8:K44-,ORF8:W45-,ORF8:Y46-,ORF8:I47-,ORF8:R48-,ORF8:V49-,ORF8:G50-,ORF8:A51-,ORF8:R52-,ORF8:K53-,ORF8:S54-,ORF8:A55-,ORF8:P56-,ORF8:L57-,ORF8:I58-,ORF8:E59-,ORF8:L60-,ORF8:C61-,ORF8:V62-,ORF8:D63-,ORF8:E64-,ORF8:A65-,ORF8:G66-,ORF8:S67-,ORF8:K68-,ORF8:S69-,ORF8:P70-,ORF8:I71-,ORF8:Q72-,ORF8:Y73-,ORF8:I74-,ORF8:D75-,ORF8:I76-,ORF8:G77-…	56	29902	89109	0	3000	0	good	189	10	0	good	0	24	6	good	14		0	good	0		B0278_60736718	1788
hCoV-19/Germany/NW-UBI-262/2021	G8	EPI_ISL_2466397	20B	45809	good	168	0	189	23	0	3	C241T,C1385T,G1820A,T2959C,C3037T,C3373A,G3431T,C6883T,G8861A,C10156T,C12249T,G13966A,C14408T,C14599T,G20134T,G21724A,A23403G,T25577C,C25626T,C27002T,G28881A,G28882A,G28883C	28003-28171		1-55,29769-29904		ChinaCDC_N_F:G28881A;G28882A;G28883C	N:R203K,N:G204R,ORF1a:H374Y,ORF1a:G519S,ORF1a:D1036E,ORF1a:V1056L,ORF1a:V2866M,ORF1a:A3995V,ORF1b:A167T,ORF1b:P314L,ORF1b:V2223L,ORF3a:I62T,ORF8:C37S,S:D614G	14	ORF8:P38-,ORF8:I39-,ORF8:H40-,ORF8:F41-,ORF8:Y42-,ORF8:S43-,ORF8:K44-,ORF8:W45-,ORF8:Y46-,ORF8:I47-,ORF8:R48-,ORF8:V49-,ORF8:G50-,ORF8:A51-,ORF8:R52-,ORF8:K53-,ORF8:S54-,ORF8:A55-,ORF8:P56-,ORF8:L57-,ORF8:I58-,ORF8:E59-,ORF8:L60-,ORF8:C61-,ORF8:V62-,ORF8:D63-,ORF8:E64-,ORF8:A65-,ORF8:G66-,ORF8:S67-,ORF8:K68-,ORF8:S69-,ORF8:P70-,ORF8:I71-,ORF8:Q72-,ORF8:Y73-,ORF8:I74-,ORF8:D75-,ORF8:I76-,ORF8:G77-…	56	29902	89109	0	3000	0	good	189	10	0	good	0	24	6	good	14		0	good	0		B0280_60739333	1788
hCoV-19/Germany/NW-UBI-263/2021	G2	EPI_ISL_2466398	20B	4340277777777770	good	168	0	189	22	0	3	C241T,G1820A,T2959C,C3037T,C3373A,G3431T,C6883T,G8861A,C10156T,C12249T,G13966A,C14408T,C14599T,G20134T,G21724A,A23403G,T25577C,C25626T,C27002T,G28881A,G28882A,G28883C	28003-28171		1-55,29769-29904		ChinaCDC_N_F:G28881A;G28882A;G28883C	N:R203K,N:G204R,ORF1a:G519S,ORF1a:D1036E,ORF1a:V1056L,ORF1a:V2866M,ORF1a:A3995V,ORF1b:A167T,ORF1b:P314L,ORF1b:V2223L,ORF3a:I62T,ORF8:C37S,S:D614G	13	ORF8:P38-,ORF8:I39-,ORF8:H40-,ORF8:F41-,ORF8:Y42-,ORF8:S43-,ORF8:K44-,ORF8:W45-,ORF8:Y46-,ORF8:I47-,ORF8:R48-,ORF8:V49-,ORF8:G50-,ORF8:A51-,ORF8:R52-,ORF8:K53-,ORF8:S54-,ORF8:A55-,ORF8:P56-,ORF8:L57-,ORF8:I58-,ORF8:E59-,ORF8:L60-,ORF8:C61-,ORF8:V62-,ORF8:D63-,ORF8:E64-,ORF8:A65-,ORF8:G66-,ORF8:S67-,ORF8:K68-,ORF8:S69-,ORF8:P70-,ORF8:I71-,ORF8:Q72-,ORF8:Y73-,ORF8:I74-,ORF8:D75-,ORF8:I76-,ORF8:G77-…	56	29902	89113	0	3000	0	good	189	10	0	good	0	24	5	good	13		0	good	0		B0281_60737180	1788
hCoV-19/Germany/NW-UBI-264/2021	M16	EPI_ISL_2466399	20B	45809	good	168	0	189	23	0	4	C241T,G1820A,T2959C,C3037T,C3373A,G3431T,C6883T,G8861A,C10156T,C12249T,G13966A,G14122A,C14408T,C14599T,G20134T,G21724A,A23403G,T25577C,C25626T,C27002T,G28881A,G28882A,G28883C	28003-28171		1-55,29769-29904		ChinaCDC_N_F:G28881A;G28882A;G28883C,Pasteur_IP4_P:G14122A	N:R203K,N:G204R,ORF1a:G519S,ORF1a:D1036E,ORF1a:V1056L,ORF1a:V2866M,ORF1a:A3995V,ORF1b:A167T,ORF1b:G219S,ORF1b:P314L,ORF1b:V2223L,ORF3a:I62T,ORF8:C37S,S:D614G	14	ORF8:P38-,ORF8:I39-,ORF8:H40-,ORF8:F41-,ORF8:Y42-,ORF8:S43-,ORF8:K44-,ORF8:W45-,ORF8:Y46-,ORF8:I47-,ORF8:R48-,ORF8:V49-,ORF8:G50-,ORF8:A51-,ORF8:R52-,ORF8:K53-,ORF8:S54-,ORF8:A55-,ORF8:P56-,ORF8:L57-,ORF8:I58-,ORF8:E59-,ORF8:L60-,ORF8:C61-,ORF8:V62-,ORF8:D63-,ORF8:E64-,ORF8:A65-,ORF8:G66-,ORF8:S67-,ORF8:K68-,ORF8:S69-,ORF8:P70-,ORF8:I71-,ORF8:Q72-,ORF8:Y73-,ORF8:I74-,ORF8:D75-,ORF8:I76-,ORF8:G77-…	56	29902	89109	0	3000	0	good	189	10	0	good	0	24	6	good	14		0	good	0		B0284_60743051	1788

## Sheet: Sheet2
Preliminary genomes with correctly called ∆168 variant	Genomes with eight common SNVs (G1820A, C3037T, C3373A, C6883T, C14408T, G21724A, A23403G, G28883C)	Genomes where the ∆168 deletion is covered by Ns	"Escapees" from hospital outbreak
CzechRepublic/IAB20_016_036/2020	Austria/CeMM2643/2020	England/ALDP-B74181/2020	Germany/NW-RKI-I-013019/2021
Germany/SH-ChVir21116/2020	Denmark/DCGC-10031/2020	Germany/BW-RKI-I-039521/2021	Germany/NW-RKI-I-019280/2021
Germany/BE-ChVir-W1718-6763/2020	Denmark/DCGC-10267/2020	Germany/BY-RKI-I-026329/2021	Germany/NW-RKI-I-026594/2021
Germany/BE-ChVir-W1684-5684/2020	Denmark/DCGC-10279/2020	Germany/BY-RKI-I-027475/2021	Germany/NW-RKI-I-029752/2021
Netherlands/GE-EMC-435/2020	Denmark/DCGC-10431/2020	Germany/BY-RKI-I-035232/2021	Germany/NW-RKI-I-034291/2021
England/MILK-B3C237/2020	Denmark/DCGC-10437/2020	Germany/HB-RKI-I-012332/2021	Germany/NW-RKI-I-036765/2021
England/MILK-B3CCA2/2020	Denmark/DCGC-10458/2020	Germany/HB-RKI-I-015015/2021	Germany/NW-RKI-I-019218/2021
Italy/VEN-IZSVe-13202/2020	Denmark/DCGC-11068/2020	Germany/HH-RKI-I-011807/2021
Italy/VEN-IZSVe-12666/2020	Denmark/DCGC-11722/2020	Germany/RP-RKI-I-040479/2021
	Denmark/DCGC-11763/2020	Israel/CVL-1056/2021
	Denmark/DCGC-12200/2020	Israel/CVL-1415/2021
	Denmark/DCGC-12242/2020	Israel/CVL-2689/2021
	Denmark/DCGC-12255/2020	Germany/NW-RKI-I-040859/2021
	Denmark/DCGC-12277/2020
	Denmark/DCGC-12620/2020
	Denmark/DCGC-12622/2020
	Denmark/DCGC-12657/2020
	Denmark/DCGC-12781/2020
	Denmark/DCGC-12791/2020
	Denmark/DCGC-15794/2020
	Denmark/DCGC-15807/2020
	Denmark/DCGC-15826/2020
	Denmark/DCGC-15840/2020
	Denmark/DCGC-16207/2020
	Denmark/DCGC-16341/2020
	Denmark/DCGC-16441/2020
	Denmark/DCGC-16563/2020
	Denmark/DCGC-28152/2020
	Denmark/DCGC-29544/2021
	Denmark/DCGC-33191/2021
	Denmark/DCGC-4590/2020
	Denmark/DCGC-5973/2020
	Denmark/DCGC-6042/2020
	Denmark/DCGC-6043/2020
	Denmark/DCGC-6044/2020
	Denmark/DCGC-6045/2020
	Denmark/DCGC-6178/2020
	Denmark/DCGC-6187/2020
	Denmark/DCGC-6209/2020
	Denmark/DCGC-6211/2020
	Denmark/DCGC-6217/2020
	Denmark/DCGC-6226/2020
	Denmark/DCGC-6227/2020
	Denmark/DCGC-6233/2020
	Denmark/DCGC-6234/2020
	Denmark/DCGC-6236/2020
	Denmark/DCGC-6237/2020
	Denmark/DCGC-6239/2020
	Denmark/DCGC-6240/2020
	Denmark/DCGC-6241/2020
	Denmark/DCGC-6242/2020
	Denmark/DCGC-6243/2020
	Denmark/DCGC-6244/2020
	Denmark/DCGC-6262/2020
	Denmark/DCGC-6263/2020
	Denmark/DCGC-6264/2020
	Denmark/DCGC-6265/2020
	Denmark/DCGC-6266/2020
	Denmark/DCGC-6484/2020
	Denmark/DCGC-6552/2020
	Denmark/DCGC-6573/2020
	Denmark/DCGC-6619/2020
	Denmark/DCGC-6650/2020
	Denmark/DCGC-6652/2020
	Denmark/DCGC-6817/2020
	Denmark/DCGC-6959/2020
	Denmark/DCGC-6960/2020
	Denmark/DCGC-7071/2020
	Denmark/DCGC-7199/2020
	Denmark/DCGC-7200/2020
	Denmark/DCGC-7253/2020
	Denmark/DCGC-7254/2020
	Denmark/DCGC-7257/2020
	Denmark/DCGC-7264/2020
	Denmark/DCGC-7267/2020
	Denmark/DCGC-7297/2020
	Denmark/DCGC-7299/2020
	Denmark/DCGC-7434/2020
	Denmark/DCGC-7476/2020
	Denmark/DCGC-7545/2020
	Denmark/DCGC-7550/2020
	Denmark/DCGC-7647/2020
	Denmark/DCGC-7775/2020
	Denmark/DCGC-7777/2020
	Denmark/DCGC-7880/2020
	Denmark/DCGC-8346/2020
	Denmark/DCGC-8565/2020
	Denmark/DCGC-9275/2020
	Denmark/DCGC-9292/2020
	Denmark/DCGC-9820/2020
	England/204781351/2020
	England/204781352/2020
	England/204781353/2020
	England/204781354/2020
	England/204781357/2020
	England/204781358/2020
	England/204821174/2020
	England/204821185/2020
	England/ALDP-115CB6A/2021
	England/ALDP-981EF5/2020
	England/ALDP-B1B34A/2020
	England/ALDP-B1B4CF/2020
	England/ALDP-BBA0EC/2020
	England/ALDP-C25FC0/2020
	England/ALDP-C582CB/2020
	England/ALDP-CB4F6C/2020
	England/BHRT-24B3E17/2020
	England/BHRT-24B3F23/2020
	England/C200036985/2020
	England/CAMB-1B77F3/2020
	England/CAMB-1B8F18/2020
	England/CAMB-1B9AAD/2020
	England/CAMC-9464EB/2020
	England/CAMC-A584D6/2020
	England/CAMC-AEACD1/2020
	England/CAMC-AEACFF/2020
	England/CAMC-B08410/2020
	England/CAMC-B326AE/2020
	England/CAMC-B331D9/2020
	England/CAMC-B349EF/2020
	England/CAMC-B36710/2020
	England/CAMC-B381A7/2020
	England/CAMC-B381C5/2020
	England/CAMC-B5176A/2020
	England/CAMC-B51F44/2020
	England/CAMC-B52392/2020
	England/CAMC-B990E3/2020
	England/CAMC-BC063C/2020
	England/CAMC-BC07DF/2020
	England/CAMC-BC07EE/2020
	England/CAMC-BC0B79/2020
	England/CAMC-BC0B97/2020
	England/CAMC-BC1D27/2020
	England/CAMC-BC2FD5/2020
	England/CAMC-BFB753/2020
	England/CAMC-C45883/2020
	England/CAMC-CB79E3/2020
	England/CAMC-CF4AAB/2020
	England/KGHT-2684F1A/2020
	England/KGHT-2684FA1/2020
	England/KGHT-2684FCF/2020
	England/KGHT-26850F8/2020
	England/KGHT-2685122/2020
	England/KGHT-2685131/2020
	England/MILK-10AF05B/2021
	England/MILK-6238FA/2020
	England/MILK-819066/2020
	England/MILK-81BEA6/2020
	England/MILK-9A699F/2020
	England/MILK-9A69AE/2020
	England/MILK-9A9C2A/2020
	England/MILK-9AAE50/2020
	England/MILK-9D44E2/2020
	England/MILK-9EF851/2020
	England/MILK-A464DB/2020
	England/MILK-A46893/2020
	England/MILK-A468DF/2020
	England/MILK-A470A9/2020
	England/MILK-A47BC6/2020
	England/MILK-A47BD5/2020
	England/MILK-A47BF3/2020
	England/MILK-AB7F7A/2020
	England/MILK-AB8665/2020
	England/MILK-ABB8B7/2020
	England/MILK-ABC124/2020
	England/MILK-ABC212/2020
	England/MILK-AC7636/2020
	England/MILK-AC81E9/2020
	England/MILK-ACBFCE/2020
	England/MILK-ACEBB8/2020
	England/MILK-ACEF07/2020
	England/MILK-B02892/2020
	England/MILK-B028CF/2020
	England/MILK-B02908/2020
	England/MILK-B392FE/2020
	England/MILK-B5A831/2020
	England/MILK-B88296/2020
	England/MILK-B939C0/2020
	England/MILK-B95EB0/2020
	England/MILK-B95EED/2020
	England/MILK-BAB260/2020
	England/MILK-BAB716/2020
	England/MILK-BAB7AD/2020
	England/MILK-BFDEA7/2020
	England/MILK-C3043C/2020
	England/MILK-E7F314/2021
	England/MILK-EC1771/2021
	England/QEUH-96BA93/2020
	England/QEUH-997CD4/2020
	England/QEUH-99921C/2020
	England/QEUH-B2B71E/2020
	England/QEUH-B2F905/2020
	England/QEUH-C163D5/2020
	England/QEUH-C1642D/2020
	England/QEUH-C9332B/2020
	England/QEUH-CD0FB5/2020
	England/QEUH-D14BED/2020
	England/QEUH-D199EE/2020
	England/TFCI-2700CF0/2020
	England/TFCI-2702FE6/2020
	France/un-21012300229/2021
	Germany/HH-HPI-p2957/2020
	Germany/HH-HPI-p2994/2020
	Germany/HH-HPI-p2995/2020
	Germany/RP-RKI-I-0317/2020
	Germany/ST-MD379/2021
	Iceland/3674/2020
	Iceland/6134/2020
	Iceland/6662/2020
	Ireland/LK-NVRL-73IRL34089/2020
	Israel/CVL-1044/2021
	Israel/CVL-128-ngs/2020
	Israel/CVL-2060/2021
	Israel/CVL-2565/2021
	Israel/CVL-2566/2021
	Israel/CVL-45605/2020
	Israel/CVL-46019/2020
	mink/Denmark/mDK-465/2020
	mink/Denmark/mDK-466/2020
	mink/Denmark/mDK-467/2020
	Netherlands/GE-RIVM-10219/2021
	Netherlands/NB-RIVM-10499/2021
	Netherlands/NB-RIVM-10708/2021
	Netherlands/OV-RIVM-21508/2020
	Netherlands/UT-RIVM-10020/2021
	Netherlands/UT-RIVM-10148/2020
	Switzerland/BE-ETHZ-431062/2020
	Switzerland/BE-ETHZ-431224/2020
	Switzerland/SZ-ETHZ-430930/2020
	Switzerland/ZH-ETHZ-400334/2020
	Switzerland/ZH-ETHZ-410101/2020
	Switzerland/ZH-ETHZ-460651/2021
	Switzerland/ZH-ETHZ-461043/2021
	Switzerland/ZH-ETHZ-470048/2021
	Wales/ALDP-F4A4B4/2021
	Wales/MILK-A47C1E/2020
	Germany/TH-RKI-I-015282/2021
	Germany/BE-RKI-I-022419/2021
	England/OXON-F53360/2021

## Sheet: Sheet3
id	accession	sampling_date	runid	ATGACCCGTCTAAATTGG	deletion in GISAID
England/MILK-B3CCA2/2020	EPI_ISL_679827	2020-11-01	ERR5079713	7491	1
England/MILK-B3C237/2020	EPI_ISL_705497	2020-11-02	ERR5074386	1649	1
England/MILK-A464DB/2020	EPI_ISL_598759	2020-10-05	ERR4763424	1474	0
England/MILK-A468DF/2020	EPI_ISL_598732	2020-10-05	ERR4763607	776	0
England/CAMC-A584D6/2020	EPI_ISL_596969	2020-10-08	ERR4764268	759	0
England/CAMC-9464EB/2020	EPI_ISL_556696	2020-07-12	ERR4638487	636	0
England/ALDP-B74181/2020	EPI_ISL_664905	2020-11-12	ERR4892336	614	0
England/CAMC-B990E3/2020	EPI_ISL_673337	2020-11-12	ERR4909156	554	0
England/MILK-ABC212/2020	EPI_ISL_631176	2020-10-21	ERR4824920	530	0
England/MILK-AB8665/2020	EPI_ISL_623466	2020-10-21	ERR4825650	505	0
England/MILK-AC81E9/2020	EPI_ISL_629486	2020-10-21	ERR4827051	495	0
England/MILK-BAB260/2020	EPI_ISL_681496	2020-11-18	ERR4921484	480	0
England/QEUH-D199EE/2020	EPI_ISL_800124	2020-12-26	ERR5067033	478	0
England/MILK-BAB716/2020	EPI_ISL_783107	2020-11-18	ERR5057229	464	0
England/CAMC-BC2FD5/2020	EPI_ISL_800888	2020-11-23	ERR5065920	459	0
England/QEUH-C9332B/2020	EPI_ISL_762003	2020-12-17	ERR5040857	429	0
England/QEUH-CD0FB5/2020	EPI_ISL_782399	2020-12-24	ERR5058176	385	0
England/MILK-819066/2020	EPI_ISL_557258	2020-07-17	ERR4637577	382	0
England/CAMC-BC0B97/2020	EPI_ISL_704700	2020-11-22	ERR4988736	379	0
England/ALDP-B1B4CF/2020	EPI_ISL_645808	2020-11-01	ERR4862114	370	0
England/MILK-A46893/2020	EPI_ISL_598615	2020-10-05	ERR4763610	358	0
England/MILK-B95EB0/2020	EPI_ISL_674900	2020-11-14	ERR4908100	353	0
England/CAMC-BFB753/2020	EPI_ISL_709072	2020-12-05	ERR5007292	350	0
England/MILK-ABB8B7/2020	EPI_ISL_631145	2020-10-21	ERR4824853	345	0
England/QEUH-C163D5/2020	EPI_ISL_709301	2020-12-04	ERR5007701	339	0
England/CAMC-AEACD1/2020	EPI_ISL_633373	2020-10-25	ERR4835116	330	0
England/MILK-C3043C/2020	EPI_ISL_782852	2020-12-07	ERR5057879	326	0
England/CAMC-BC07DF/2020	EPI_ISL_704984	2020-11-22	ERR4988572	321	0
England/MILK-A47BD5/2020	EPI_ISL_598345	2020-10-05	ERR4763661	305	0
Wales/MILK-A47C1E/2020	EPI_ISL_609266	2020-10-05	ERR4786809	304	0
England/CAMC-CB79E3/2020	EPI_ISL_777723	2020-12-19	ERR5054356	295	0
England/BHRT-24B3E17/2020	EPI_ISL_541773	2020-07-04	ERR4616063	289	0
England/CAMC-B51F44/2020	EPI_ISL_657720	2020-11-08	ERR4876240	284	0
England/ALDP-C25FC0/2020	EPI_ISL_782791	2020-12-06	ERR5057731	281	0
England/MILK-ACEF07/2020	EPI_ISL_629554	2020-10-22	ERR4827092	263	0
England/CAMC-B08410/2020	EPI_ISL_643710	2020-10-29	ERR4848346	255	0
England/MILK-B392FE/2020	EPI_ISL_658920	2020-11-01	ERR4874901	244	0
England/MILK-AB7F7A/2020	EPI_ISL_623571	2020-10-21	ERR4825129	235	0
England/ALDP-BBA0EC/2020	EPI_ISL_701882	2020-11-20	ERR4990387	226	0
England/MILK-BAB7AD/2020	EPI_ISL_681459	2020-11-18	ERR4921646	220	0
England/MILK-ABC124/2020	EPI_ISL_631264	2020-10-22	ERR4825066	219	0
England/CAMC-C45883/2020	EPI_ISL_719377	2020-12-10	ERR5027737	208	0
England/CAMC-B349EF/2020	EPI_ISL_659614	2020-11-05	ERR4874264	203	0
England/CAMC-B381C5/2020	EPI_ISL_658959	2020-11-05	ERR4874970	198	0
England/QEUH-D14BED/2020	EPI_ISL_799391	2020-12-27	ERR5174744	190	0
England/MILK-B5A831/2020	EPI_ISL_658223	2020-11-06	ERR4876747	185	0
England/ALDP-981EF5/2020	EPI_ISL_552719	2020-08-10	ERR4642986	182	0
England/MILK-A470A9/2020	EPI_ISL_598495	2020-10-06	ERR4763696	182	0
England/CAMC-BC07EE/2020	EPI_ISL_704917	2020-11-22	ERR4988591	173	0
England/CAMC-AEACFF/2020	EPI_ISL_633215	2020-10-25	ERR4834859	171	0
England/MILK-9A69AE/2020	EPI_ISL_550234	2020-09-01	ERR4647100	171	0
England/MILK-ACEBB8/2020	EPI_ISL_629545	2020-10-21	ERR4827281	166	0
England/QEUH-B2F905/2020	EPI_ISL_660017	2020-11-02	ERR4873837	166	0
England/MILK-A47BF3/2020	EPI_ISL_598367	2020-10-05	ERR4763659	158	0
England/CAMC-B331D9/2020	EPI_ISL_659140	2020-11-05	ERR4874557	157	0
England/QEUH-B2B71E/2020	EPI_ISL_646458	2020-11-02	ERR4860794	153	0
England/MILK-B028CF/2020	EPI_ISL_642802	2020-10-24	ERR4848898	152	0
England/MILK-81BEA6/2020	EPI_ISL_557167	2020-07-18	ERR4637584	145	0
England/MILK-B02892/2020	EPI_ISL_643029	2020-10-24	ERR4848900	144	0
England/ALDP-C582CB/2020	EPI_ISL_736103	2020-12-13	ERR5039149	138	0
Wales/ALDP-F4A4B4/2021	EPI_ISL_858085	2021-01-03	ERR5184313	133	0
England/QEUH-C1642D/2020	EPI_ISL_709556	2020-12-04	ERR5007703	127	0
England/MILK-EC1771/2021	EPI_ISL_835902	2021-01-03	ERR5182172	114	0
England/MILK-B95EED/2020	EPI_ISL_674903	2020-11-14	ERR4908097	100	0
England/MILK-A47BC6/2020	EPI_ISL_598476	2020-10-05	ERR4763680	99	0
England/MILK-9AAE50/2020	EPI_ISL_551019	2020-08-26	ERR4646244	85	0
England/MILK-B02908/2020	EPI_ISL_642990	2020-10-24	ERR4848894	85	0
England/QEUH-99921C/2020	EPI_ISL_541843	2020-08-24	ERR4616011	82	0
England/MILK-B939C0/2020	EPI_ISL_676144	2020-11-13	ERR4908848	76	0
England/QEUH-96BA93/2020	EPI_ISL_531429	2020-08-14	ERR4598158	70	0
England/MILK-E7F314/2021	EPI_ISL_821410	2021-01-02	ERR5180375	67	0
England/CAMC-B381A7/2020	EPI_ISL_658919	2020-11-05	ERR4874987	60	0
England/MILK-6238FA/2020	EPI_ISL_557867	2020-07-06	ERR4636955	54	0
England/MILK-B88296/2020	EPI_ISL_674278	2020-11-13	ERR4907297	52	0
England/MILK-9A9C2A/2020	EPI_ISL_551169	2020-09-01	ERR4646140	48	0
England/MILK-81D8E2/2020	EPI_ISL_557281	2020-07-18	ERR4637549	41	0
England/MILK-9A699F/2020	EPI_ISL_581383	2020-09-01	ERR4681655	41	0
England/CAMB-1B9AAD/2020	EPI_ISL_679148	2020-11-08	ERR5073654	7	0
England/CAMC-B52392/2020	EPI_ISL_657005	2020-11-08	ERR4876871	5	0
England/MILK-9EF851/2020	EPI_ISL_594949	2020-09-23	ERR4758237	5	0
England/ALDP-B1B34A/2020	EPI_ISL_645547	2020-11-01	ERR4862116	3	0
England/CAMB-1B8F18/2020	EPI_ISL_650353	2020-11-03	ERR4868652	3	0
England/CAMC-BC1D27/2020	EPI_ISL_702489	2020-11-22	ERR5069717	3	0
England/CAMC-A65209/2020	EPI_ISL_638036	2020-10-11	ERR4838635	2	0
England/CAMC-CF4AAB/2020	EPI_ISL_781811	2020-12-21	ERR5059078	2	0
England/MILK-9D44E2/2020	EPI_ISL_601736	2020-09-19	ERR4659394	2	0
England/CAMB-1AA7A8/2020	EPI_ISL_470124	2020-04-17	ERR4437012	1	0
England/CAMB-1B77F3/2020	EPI_ISL_637399	2020-10-23	ERR4837789	1	0
England/CAMC-B34563/2020	EPI_ISL_659555	2020-11-05	ERR4874353	1	0
England/MILK-A44B7E/2020	EPI_ISL_598567	2020-10-07	ERR4763343	1	0
England/MILK-A467A5/2020	EPI_ISL_598599	2020-10-05	ERR4763530	1	0
England/MILK-ACBFCE/2020	EPI_ISL_629286	2020-10-21	ERR4826979	1	0
England/QEUH-BF0967/2020	EPI_ISL_709159	2020-12-05	ERR5007194	1	0
Ireland/KY-NVRL-81IRL22000/2020	EPI_ISL_837389	2020-12-28	ERR5104486	1	0
Ireland/LK-NVRL-73IRL34089/2020	EPI_ISL_578216	2020-09-16	ERR4686340	1	0
Latvia/098/2020	EPI_ISL_515185	2020-07-29	ERR4619711	1	0
Scotland/QEUH-E49119/2021	EPI_ISL_858432	2021-01-04	ERR5179489	1	0
