# Supplementary material for: Multiple Occurrences of a 168-Nucleotide Deletion in SARS-CoV-2 ORF8, Unnoticed by Standard Amplicon Sequencing and Variant Calling Pipelines
Source: Viruses. 2021 Sep 18;13(9):1870. doi: 10.3390/v13091870 (PMC8518987; doi:10.3390/v13091870)
Supplement: Supplementary file 1 [file viruses-13-01870-s001.zip › Brandt_et_al._Viruses_Supplementary_Table_S3.xlsx]

## Sheet: Tabelle1
strain	gisaid_epi_isl	date	originating_lab	submitting_lab	authors
Afghanistan/IMB07956/2020	EPI_ISL_1034760	2020-06-06	Bundeswehr Institute of Microbiology	Bundeswehr Institute of Microbiology	Markus Antwerpen et al
Afghanistan/IMB07958/2020	EPI_ISL_1000998	2020-06-13	Bundeswehr Institute of Microbiology	Bundeswehr Institute of Microbiology	Markus Antwerpen et al
Afghanistan/IMB07960/2020	EPI_ISL_1000999	2020-06-07	Bundeswehr Institute of Microbiology	Bundeswehr Institute of Microbiology	Markus Antwerpen et al
Afghanistan/IMB07962/2020	EPI_ISL_1001000	2020-06-02	Bundeswehr Institute of Microbiology	Bundeswehr Institute of Microbiology	Markus Antwerpen et al
Afghanistan/IMB07964/2020	EPI_ISL_1001001	2020-05-30	Bundeswehr Institute of Microbiology	Bundeswehr Institute of Microbiology	Markus Antwerpen et al
Afghanistan/IMB07966/2020	EPI_ISL_1001002	2020-05-30	Bundeswehr Institute of Microbiology	Bundeswehr Institute of Microbiology	Markus Antwerpen et al
Afghanistan/IMB07968/2020	EPI_ISL_1001003	2020-06-15	Bundeswehr Institute of Microbiology	Bundeswehr Institute of Microbiology	Markus Antwerpen et al
Afghanistan/IMB07970/2020	EPI_ISL_1001004	2020-06-13	Bundeswehr Institute of Microbiology	Bundeswehr Institute of Microbiology	Markus Antwerpen et al
Afghanistan/IMB15483/2021	EPI_ISL_1046791	2021-01-21	Bundeswehr Institute of Microbiology	Bundeswehr Institute of Microbiology	Markus Antwerpen et al
Afghanistan/IMB15484/2021	EPI_ISL_1046792	2021-01-21	Bundeswehr Institute of Microbiology	Bundeswehr Institute of Microbiology	Markus Antwerpen et al
Afghanistan/IMB15485/2021	EPI_ISL_1034755	2021-01-21	Bundeswehr Institute of Microbiology	Bundeswehr Institute of Microbiology	Markus Antwerpen et al
Afghanistan/IMB15486/2021	EPI_ISL_1046793	2021-01-21	Bundeswehr Institute of Microbiology	Bundeswehr Institute of Microbiology	Markus Antwerpen et al
Afghanistan/IMB15487/2021	EPI_ISL_1034756	2021-01-21	Bundeswehr Institute of Microbiology	Bundeswehr Institute of Microbiology	Markus Antwerpen et al
Afghanistan/IMB15488/2021	EPI_ISL_1034757	2021-01-21	Bundeswehr Institute of Microbiology	Bundeswehr Institute of Microbiology	Markus Antwerpen et al
Afghanistan/IMB15490/2021	EPI_ISL_1034758	2021-01-21	Bundeswehr Institute of Microbiology	Bundeswehr Institute of Microbiology	Markus Antwerpen et al
Afghanistan/IMB15491/2021	EPI_ISL_1034759	2021-01-21	Bundeswehr Institute of Microbiology	Bundeswehr Institute of Microbiology	Markus Antwerpen et al
Albania/Cento-30536457/2020	EPI_ISL_815257	2020-09-05	Centogene	Centogene	Peter Bauer et al
Algeria/G0638_2264/2020	EPI_ISL_418241	2020-03-02	NIC Viral Respiratory Unit - Institut Pasteur of Algeria	National Reference Center for Viruses of Respiratory Infections, Institut Pasteur, Paris	MÃ©lanie Albert et al
Algeria/G0640_2265/2020	EPI_ISL_418242	2020-03-08	NIC Viral Respiratory Unit - Institut Pasteur of Algeria	National Reference Center for Viruses of Respiratory Infections, Institut Pasteur, Paris	MÃ©lanie Albert et al
Algeria/G0860_2262/2020	EPI_ISL_420037	2020-03-02	NIC Viral Respiratory Unit - Institut Pasteur of Algeria	National Reference Center for Viruses of Respiratory Infections, Institut Pasteur, Paris	MÃ©lanie Albert et al
Algeria/G33030-8855/2020	EPI_ISL_766868	2020-06	NIC Viral Respiratory Unit - Institut Pasteur of Algeria	National Reference Center for Viruses of Respiratory Infections, Institut Pasteur, Paris	MÃ©lanie Albert et al
Algeria/G35014-8856/2020	EPI_ISL_766869	2020-06-09	NIC Viral Respiratory Unit - Institut Pasteur of Algeria	National Reference Center for Viruses of Respiratory Infections, Institut Pasteur, Paris	MÃ©lanie Albert et al
Algeria/G35081-8858/2020	EPI_ISL_766870	2020-06-15	NIC Viral Respiratory Unit - Institut Pasteur of Algeria	National Reference Center for Viruses of Respiratory Infections, Institut Pasteur, Paris	MÃ©lanie Albert et al
Algeria/G35155-8850/2020	EPI_ISL_766864	2020-07-15	NIC Viral Respiratory Unit - Institut Pasteur of Algeria	National Reference Center for Viruses of Respiratory Infections, Institut Pasteur, Paris	MÃ©lanie Albert et al
Algeria/G37138-8854/2020	EPI_ISL_766867	2020-06-18	NIC Viral Respiratory Unit - Institut Pasteur of Algeria	National Reference Center for Viruses of Respiratory Infections, Institut Pasteur, Paris	MÃ©lanie Albert et al
Algeria/G37308-8864/2020	EPI_ISL_766875	2020-06-17	NIC Viral Respiratory Unit - Institut Pasteur of Algeria	National Reference Center for Viruses of Respiratory Infections, Institut Pasteur, Paris	MÃ©lanie Albert et al
Algeria/G37318-8849/2020	EPI_ISL_766863	2020-06-15	NIC Viral Respiratory Unit - Institut Pasteur of Algeria	National Reference Center for Viruses of Respiratory Infections, Institut Pasteur, Paris	MÃ©lanie Albert et al
Algeria/G38029-8861/2020	EPI_ISL_766872	2020-06-19	NIC Viral Respiratory Unit - Institut Pasteur of Algeria	National Reference Center for Viruses of Respiratory Infections, Institut Pasteur, Paris	MÃ©lanie Albert et al
Algeria/G38218-8852/2020	EPI_ISL_766865	2020-06-19	NIC Viral Respiratory Unit - Institut Pasteur of Algeria	National Reference Center for Viruses of Respiratory Infections, Institut Pasteur, Paris	MÃ©lanie Albert et al
Algeria/G38599-8859/2020	EPI_ISL_766871	2020-06-20	NIC Viral Respiratory Unit - Institut Pasteur of Algeria	National Reference Center for Viruses of Respiratory Infections, Institut Pasteur, Paris	MÃ©lanie Albert et al
Algeria/G38882-8853/2020	EPI_ISL_766866	2020-06-20	NIC Viral Respiratory Unit - Institut Pasteur of Algeria	National Reference Center for Viruses of Respiratory Infections, Institut Pasteur, Paris	MÃ©lanie Albert et al
Algeria/G40009-8862/2020	EPI_ISL_766873	2020-06-22	NIC Viral Respiratory Unit - Institut Pasteur of Algeria	National Reference Center for Viruses of Respiratory Infections, Institut Pasteur, Paris	MÃ©lanie Albert et al
Algeria/G41498-8846/2020	EPI_ISL_766861	2020-06-29	NIC Viral Respiratory Unit - Institut Pasteur of Algeria	National Reference Center for Viruses of Respiratory Infections, Institut Pasteur, Paris	MÃ©lanie Albert et al
Algeria/G42452-8847/2020	EPI_ISL_766862	2020-06-24	NIC Viral Respiratory Unit - Institut Pasteur of Algeria	National Reference Center for Viruses of Respiratory Infections, Institut Pasteur, Paris	MÃ©lanie Albert et al
Algeria/G43521-8863/2020	EPI_ISL_766874	2020-06-21	NIC Viral Respiratory Unit - Institut Pasteur of Algeria	National Reference Center for Viruses of Respiratory Infections, Institut Pasteur, Paris	MÃ©lanie Albert et al
Andorra/202552/2020	EPI_ISL_539496	2020-03-13	Hospital Nostra Senyora de Meritxell	Instituto de Salud Carlos III	Iglesias-Caballero et al
Anhui/SZ005/2020	EPI_ISL_413485	2020-01-24	Department of microbiology laboratory,Anhui Provincial Center for Disease Control and Prevention	Department of microbiology laboratory,Anhui Provincial Center for Disease Control and Prevention	Weiwei Li et al
AntiguaandBarbuda/ATG39386/2020	EPI_ISL_756361	2020-10-29	The Caribbean Public Health Agency	Carrington Lab, Department of PreClinical Sciences, Faculty of Medical Sciences, The University of the West Indies	Nikita S. D. Sahadeo et al
Argentina/C121/2020	EPI_ISL_420600	2020-03-07	Servicio Virosis Respiratorias-Departamento VirologÃ­a-INEI	Instituto Nacional Enfermedades Infecciosas C.G.Malbran	Baumeister E. et al
Argentina/C1374/2020	EPI_ISL_420599	2020-03-18	Servicio Virosis Respiratorias-Departamento VirologÃ­a-INEI	Instituto Nacional Enfermedades Infecciosas C.G.Malbran	Baumeister E. et al
Argentina/C3013/2020	EPI_ISL_420598	2020-03-22	Servicio Virosis Respiratorias-Departamento VirologÃ­a-INEI	Instituto Nacional Enfermedades Infecciosas C.G.Malbran	Baumeister E. et al
Argentina/C97133/2020	EPI_ISL_778843	2020-11-20	Servicio Virosis Respiratorias-Departamento VirologÃ­a-INEI	Instituto Nacional Enfermedades Infecciosas C.G.Malbran	Baumeister E. et al
Argentina/Heritas-HG023/2020	EPI_ISL_615121	2020-05-26	Hospital de PediatrÃ­a "Prof. Dr. Juan P Garrahan"	HÃ©ritas	Cristian Rohr et al
Argentina/Heritas_HG001/2020	EPI_ISL_476496	2020-04-22	Hospital Garrahan	HÃ©ritas	Dalmacio Pereyra et al
Argentina/Heritas_HG006/2020	EPI_ISL_476561	2020-05-07	Hospital Garrahan	HÃ©ritas	Roberta Crespo et al
Argentina/Heritas_HG007/2020	EPI_ISL_476565	2020-05-09	Hospital de PediatrÃ­a "Prof. Dr. Juan P Garrahan"	HÃ©ritas	Andrea Mangano et al
Argentina/Heritas_HG009/2020	EPI_ISL_476568	2020-05-14	Hospital de PediatrÃ­a "Prof. Dr. Juan P Garrahan"	HÃ©ritas	Cristian Rohr et al
Argentina/Heritas_HG014/2020	EPI_ISL_476563	2020-05-16	Hospital de PediatrÃ­a "Prof. Dr. Juan P Garrahan"	HÃ©ritas	Dalmacio Pereyra et al
Argentina/Heritas_HG015/2020	EPI_ISL_476567	2020-05-18	Hospital de PediatrÃ­a "Prof. Dr. Juan P Garrahan"	HÃ©ritas	Dalmacio Pereyra et al
Argentina/Heritas_HG018/2020	EPI_ISL_476571	2020-05-19	Hospital de PediatrÃ­a "Prof. Dr. Juan P Garrahan"	HÃ©ritas	Dalmacio Pereyra et al
Argentina/Heritas_HG019/2020	EPI_ISL_476573	2020-05-22	Hospital de PediatrÃ­a "Prof. Dr. Juan P Garrahan"	HÃ©ritas	Dalmacio Pereyra et al
Argentina/INEI000452/2020	EPI_ISL_849155	2020-03-14	Servicio Virosis Respiratorias-Departamento VirologÃ­a-INEI	Instituto Nacional Enfermedades Infecciosas C.G.Malbran	Baumeister E. et al
Argentina/INEI006559/2020	EPI_ISL_849185	2020-04-13	Servicio Virosis Respiratorias-Departamento VirologÃ­a-INEI	Instituto Nacional Enfermedades Infecciosas C.G.Malbran	Baumeister E. et al
Argentina/INEI011051/2020	EPI_ISL_849188	2020-05-05	Servicio Virosis Respiratorias-Departamento VirologÃ­a-INEI	Instituto Nacional Enfermedades Infecciosas C.G.Malbran	Baumeister E. et al
Argentina/INEI011115/2020	EPI_ISL_849156	2020-05-05	Servicio Virosis Respiratorias-Departamento VirologÃ­a-INEI	Instituto Nacional Enfermedades Infecciosas C.G.Malbran	Baumeister E. et al
Argentina/INEI011213/2020	EPI_ISL_849189	2020-05-06	Servicio Virosis Respiratorias-Departamento VirologÃ­a-INEI	Instituto Nacional Enfermedades Infecciosas C.G.Malbran	Baumeister E. et al
Argentina/INEI011302/2020	EPI_ISL_849157	2020-05-07	Servicio Virosis Respiratorias-Departamento VirologÃ­a-INEI	Instituto Nacional Enfermedades Infecciosas C.G.Malbran	Baumeister E. et al
Argentina/INEI011304/2020	EPI_ISL_849158	2020-05-07	Servicio Virosis Respiratorias-Departamento VirologÃ­a-INEI	Instituto Nacional Enfermedades Infecciosas C.G.Malbran	Baumeister E. et al
Argentina/INEI011306/2020	EPI_ISL_849159	2020-05-07	Servicio Virosis Respiratorias-Departamento VirologÃ­a-INEI	Instituto Nacional Enfermedades Infecciosas C.G.Malbran	Baumeister E. et al
Argentina/INEI011343/2020	EPI_ISL_849190	2020-05-07	Servicio Virosis Respiratorias-Departamento VirologÃ­a-INEI	Instituto Nacional Enfermedades Infecciosas C.G.Malbran	Baumeister E. et al
Argentina/INEI011516/2020	EPI_ISL_849191	2020-05-08	Servicio Virosis Respiratorias-Departamento VirologÃ­a-INEI	Instituto Nacional Enfermedades Infecciosas C.G.Malbran	Baumeister E. et al
Argentina/INEI011518/2020	EPI_ISL_849160	2020-05-08	Servicio Virosis Respiratorias-Departamento VirologÃ­a-INEI	Instituto Nacional Enfermedades Infecciosas C.G.Malbran	Baumeister E. et al
Argentina/INEI011534/2020	EPI_ISL_849161	2020-05-08	Servicio Virosis Respiratorias-Departamento VirologÃ­a-INEI	Instituto Nacional Enfermedades Infecciosas C.G.Malbran	Baumeister E. et al
Argentina/INEI011535/2020	EPI_ISL_849162	2020-05-08	Servicio Virosis Respiratorias-Departamento VirologÃ­a-INEI	Instituto Nacional Enfermedades Infecciosas C.G.Malbran	Baumeister E. et al
Argentina/INEI011544/2020	EPI_ISL_849163	2020-05-08	Servicio Virosis Respiratorias-Departamento VirologÃ­a-INEI	Instituto Nacional Enfermedades Infecciosas C.G.Malbran	Baumeister E. et al
Argentina/INEI011545/2020	EPI_ISL_849164	2020-05-08	Servicio Virosis Respiratorias-Departamento VirologÃ­a-INEI	Instituto Nacional Enfermedades Infecciosas C.G.Malbran	Baumeister E. et al
Argentina/INEI011618/2020	EPI_ISL_849192	2020-05-09	Servicio Virosis Respiratorias-Departamento VirologÃ­a-INEI	Instituto Nacional Enfermedades Infecciosas C.G.Malbran	Baumeister E. et al
Argentina/INEI011714/2020	EPI_ISL_849165	2020-05-10	Servicio Virosis Respiratorias-Departamento VirologÃ­a-INEI	Instituto Nacional Enfermedades Infecciosas C.G.Malbran	Baumeister E. et al
Argentina/INEI011717/2020	EPI_ISL_849166	2020-05-10	Servicio Virosis Respiratorias-Departamento VirologÃ­a-INEI	Instituto Nacional Enfermedades Infecciosas C.G.Malbran	Baumeister E. et al
Argentina/INEI011800/2020	EPI_ISL_849151	2020-05-11	Servicio Virosis Respiratorias-Departamento VirologÃ­a-INEI	Instituto Nacional Enfermedades Infecciosas C.G.Malbran	Baumeister E. et al
Argentina/INEI011801/2020	EPI_ISL_849193	2020-05-11	Servicio Virosis Respiratorias-Departamento VirologÃ­a-INEI	Instituto Nacional Enfermedades Infecciosas C.G.Malbran	Baumeister E. et al
Argentina/INEI011808/2020	EPI_ISL_849194	2020-05-11	Servicio Virosis Respiratorias-Departamento VirologÃ­a-INEI	Instituto Nacional Enfermedades Infecciosas C.G.Malbran	Baumeister E. et al
Argentina/INEI011923/2020	EPI_ISL_849195	2020-05-12	Servicio Virosis Respiratorias-Departamento VirologÃ­a-INEI	Instituto Nacional Enfermedades Infecciosas C.G.Malbran	Baumeister E. et al
Argentina/INEI011944/2020	EPI_ISL_849167	2020-05-12	Servicio Virosis Respiratorias-Departamento VirologÃ­a-INEI	Instituto Nacional Enfermedades Infecciosas C.G.Malbran	Baumeister E. et al
Argentina/INEI012062/2020	EPI_ISL_849196	2020-05-13	Servicio Virosis Respiratorias-Departamento VirologÃ­a-INEI	Instituto Nacional Enfermedades Infecciosas C.G.Malbran	Baumeister E. et al
Argentina/INEI012181/2020	EPI_ISL_849187	2020-05-14	Servicio Virosis Respiratorias-Departamento VirologÃ­a-INEI	Instituto Nacional Enfermedades Infecciosas C.G.Malbran	Baumeister E. et al
Argentina/INEI012182/2020	EPI_ISL_849168	2020-05-14	Servicio Virosis Respiratorias-Departamento VirologÃ­a-INEI	Instituto Nacional Enfermedades Infecciosas C.G.Malbran	Baumeister E. et al
Argentina/INEI012183/2020	EPI_ISL_849169	2020-05-14	Servicio Virosis Respiratorias-Departamento VirologÃ­a-INEI	Instituto Nacional Enfermedades Infecciosas C.G.Malbran	Baumeister E. et al
Argentina/INEI012186/2020	EPI_ISL_849186	2020-05-14	Servicio Virosis Respiratorias-Departamento VirologÃ­a-INEI	Instituto Nacional Enfermedades Infecciosas C.G.Malbran	Baumeister E. et al
Argentina/INEI012203/2020	EPI_ISL_849170	2020-05-14	Servicio Virosis Respiratorias-Departamento VirologÃ­a-INEI	Instituto Nacional Enfermedades Infecciosas C.G.Malbran	Baumeister E. et al
Argentina/INEI012205/2020	EPI_ISL_849171	2020-05-14	Servicio Virosis Respiratorias-Departamento VirologÃ­a-INEI	Instituto Nacional Enfermedades Infecciosas C.G.Malbran	Baumeister E. et al
Argentina/INEI012211/2020	EPI_ISL_849152	2020-05-14	Servicio Virosis Respiratorias-Departamento VirologÃ­a-INEI	Instituto Nacional Enfermedades Infecciosas C.G.Malbran	Baumeister E. et al
Argentina/INEI012243/2020	EPI_ISL_849197	2020-05-14	Servicio Virosis Respiratorias-Departamento VirologÃ­a-INEI	Instituto Nacional Enfermedades Infecciosas C.G.Malbran	Baumeister E. et al
Argentina/INEI012369/2020	EPI_ISL_849172	2020-05-15	Servicio Virosis Respiratorias-Departamento VirologÃ­a-INEI	Instituto Nacional Enfermedades Infecciosas C.G.Malbran	Baumeister E. et al
Argentina/INEI012387/2020	EPI_ISL_849198	2020-05-15	Servicio Virosis Respiratorias-Departamento VirologÃ­a-INEI	Instituto Nacional Enfermedades Infecciosas C.G.Malbran	Baumeister E. et al
Argentina/INEI012558/2020	EPI_ISL_849173	2020-05-16	Servicio Virosis Respiratorias-Departamento VirologÃ­a-INEI	Instituto Nacional Enfermedades Infecciosas C.G.Malbran	Baumeister E. et al
Argentina/INEI012559/2020	EPI_ISL_849174	2020-05-16	Servicio Virosis Respiratorias-Departamento VirologÃ­a-INEI	Instituto Nacional Enfermedades Infecciosas C.G.Malbran	Baumeister E. et al
Argentina/INEI012658/2020	EPI_ISL_849175	2020-05-17	Servicio Virosis Respiratorias-Departamento VirologÃ­a-INEI	Instituto Nacional Enfermedades Infecciosas C.G.Malbran	Baumeister E. et al
Argentina/INEI012659/2020	EPI_ISL_849176	2020-05-17	Servicio Virosis Respiratorias-Departamento VirologÃ­a-INEI	Instituto Nacional Enfermedades Infecciosas C.G.Malbran	Baumeister E. et al
Argentina/INEI012661/2020	EPI_ISL_849148	2020-05-17	Servicio Virosis Respiratorias-Departamento VirologÃ­a-INEI	Instituto Nacional Enfermedades Infecciosas C.G.Malbran	Baumeister E. et al
Argentina/INEI012671/2020	EPI_ISL_849177	2020-05-17	Servicio Virosis Respiratorias-Departamento VirologÃ­a-INEI	Instituto Nacional Enfermedades Infecciosas C.G.Malbran	Baumeister E. et al
Argentina/INEI012797/2020	EPI_ISL_849154	2020-05-18	Servicio Virosis Respiratorias-Departamento VirologÃ­a-INEI	Instituto Nacional Enfermedades Infecciosas C.G.Malbran	Baumeister E. et al
Argentina/INEI012979/2020	EPI_ISL_849153	2020-05-19	Servicio Virosis Respiratorias-Departamento VirologÃ­a-INEI	Instituto Nacional Enfermedades Infecciosas C.G.Malbran	Baumeister E. et al
Argentina/INEI012999/2020	EPI_ISL_849199	2020-05-19	Servicio Virosis Respiratorias-Departamento VirologÃ­a-INEI	Instituto Nacional Enfermedades Infecciosas C.G.Malbran	Baumeister E. et al
Argentina/INEI013008/2020	EPI_ISL_849149	2020-05-19	Servicio Virosis Respiratorias-Departamento VirologÃ­a-INEI	Instituto Nacional Enfermedades Infecciosas C.G.Malbran	Baumeister E. et al
Argentina/INEI013032/2020	EPI_ISL_849178	2020-05-19	Servicio Virosis Respiratorias-Departamento VirologÃ­a-INEI	Instituto Nacional Enfermedades Infecciosas C.G.Malbran	Baumeister E. et al
Argentina/INEI013074/2020	EPI_ISL_849179	2020-05-19	Servicio Virosis Respiratorias-Departamento VirologÃ­a-INEI	Instituto Nacional Enfermedades Infecciosas C.G.Malbran	Baumeister E. et al
Argentina/INEI013075/2020	EPI_ISL_849180	2020-05-19	Servicio Virosis Respiratorias-Departamento VirologÃ­a-INEI	Instituto Nacional Enfermedades Infecciosas C.G.Malbran	Baumeister E. et al
Argentina/INEI013198/2020	EPI_ISL_849181	2020-05-20	Servicio Virosis Respiratorias-Departamento VirologÃ­a-INEI	Instituto Nacional Enfermedades Infecciosas C.G.Malbran	Baumeister E. et al
Argentina/INEI013230/2020	EPI_ISL_849150	2020-05-20	Servicio Virosis Respiratorias-Departamento VirologÃ­a-INEI	Instituto Nacional Enfermedades Infecciosas C.G.Malbran	Baumeister E. et al
Argentina/INEI013249/2020	EPI_ISL_849200	2020-05-20	Servicio Virosis Respiratorias-Departamento VirologÃ­a-INEI	Instituto Nacional Enfermedades Infecciosas C.G.Malbran	Baumeister E. et al
Argentina/INEI013400/2020	EPI_ISL_849201	2020-05-21	Servicio Virosis Respiratorias-Departamento VirologÃ­a-INEI	Instituto Nacional Enfermedades Infecciosas C.G.Malbran	Baumeister E. et al
Argentina/INEI013407/2020	EPI_ISL_849202	2020-05-21	Servicio Virosis Respiratorias-Departamento VirologÃ­a-INEI	Instituto Nacional Enfermedades Infecciosas C.G.Malbran	Baumeister E. et al
Argentina/INEI013421/2020	EPI_ISL_849182	2020-05-21	Servicio Virosis Respiratorias-Departamento VirologÃ­a-INEI	Instituto Nacional Enfermedades Infecciosas C.G.Malbran	Baumeister E. et al
Argentina/INEI013441/2020	EPI_ISL_849203	2020-05-21	Servicio Virosis Respiratorias-Departamento VirologÃ­a-INEI	Instituto Nacional Enfermedades Infecciosas C.G.Malbran	Baumeister E. et al
Argentina/INEI013657/2020	EPI_ISL_849204	2020-05-22	Servicio Virosis Respiratorias-Departamento VirologÃ­a-INEI	Instituto Nacional Enfermedades Infecciosas C.G.Malbran	Baumeister E. et al
Argentina/INEI013659/2020	EPI_ISL_849183	2020-05-22	Servicio Virosis Respiratorias-Departamento VirologÃ­a-INEI	Instituto Nacional Enfermedades Infecciosas C.G.Malbran	Baumeister E. et al
Argentina/INEI013809/2020	EPI_ISL_849184	2020-05-23	Servicio Virosis Respiratorias-Departamento VirologÃ­a-INEI	Instituto Nacional Enfermedades Infecciosas C.G.Malbran	Baumeister E. et al
Argentina/INEI017138/2020	EPI_ISL_849286	2020-06-08	Servicio Virosis Respiratorias-Departamento VirologÃ­a-INEI	Instituto Nacional Enfermedades Infecciosas C.G.Malbran	Baumeister E. et al
Argentina/INEI017932/2020	EPI_ISL_849318	2020-06-11	Servicio Virosis Respiratorias-Departamento VirologÃ­a-INEI	Instituto Nacional Enfermedades Infecciosas C.G.Malbran	Baumeister E. et al
Argentina/INEI017951/2020	EPI_ISL_849300	2020-06-11	Servicio Virosis Respiratorias-Departamento VirologÃ­a-INEI	Instituto Nacional Enfermedades Infecciosas C.G.Malbran	Baumeister E. et al
Argentina/INEI018119/2020	EPI_ISL_849283	2020-06-11	Servicio Virosis Respiratorias-Departamento VirologÃ­a-INEI	Instituto Nacional Enfermedades Infecciosas C.G.Malbran	Baumeister E. et al
Argentina/INEI018564/2020	EPI_ISL_849287	2020-06-14	Servicio Virosis Respiratorias-Departamento VirologÃ­a-INEI	Instituto Nacional Enfermedades Infecciosas C.G.Malbran	Baumeister E. et al
Argentina/INEI018682/2020	EPI_ISL_849301	2020-06-13	Servicio Virosis Respiratorias-Departamento VirologÃ­a-INEI	Instituto Nacional Enfermedades Infecciosas C.G.Malbran	Baumeister E. et al
Argentina/INEI018812/2020	EPI_ISL_849299	2020-06-14	Servicio Virosis Respiratorias-Departamento VirologÃ­a-INEI	Instituto Nacional Enfermedades Infecciosas C.G.Malbran	Baumeister E. et al
Argentina/INEI019026/2020	EPI_ISL_849294	2020-06-15	Servicio Virosis Respiratorias-Departamento VirologÃ­a-INEI	Instituto Nacional Enfermedades Infecciosas C.G.Malbran	Baumeister E. et al
Argentina/INEI019377/2020	EPI_ISL_849293	2020-06-17	Servicio Virosis Respiratorias-Departamento VirologÃ­a-INEI	Instituto Nacional Enfermedades Infecciosas C.G.Malbran	Baumeister E. et al
Argentina/INEI019422/2020	EPI_ISL_849307	2020-06-17	Servicio Virosis Respiratorias-Departamento VirologÃ­a-INEI	Instituto Nacional Enfermedades Infecciosas C.G.Malbran	Baumeister E. et al
Argentina/INEI019568/2020	EPI_ISL_849295	2020-06-17	Servicio Virosis Respiratorias-Departamento VirologÃ­a-INEI	Instituto Nacional Enfermedades Infecciosas C.G.Malbran	Baumeister E. et al
Argentina/INEI019764/2020	EPI_ISL_849290	2020-06-18	Servicio Virosis Respiratorias-Departamento VirologÃ­a-INEI	Instituto Nacional Enfermedades Infecciosas C.G.Malbran	Baumeister E. et al
Argentina/INEI020862/2020	EPI_ISL_849298	2020-06-10	Servicio Virosis Respiratorias-Departamento VirologÃ­a-INEI	Instituto Nacional Enfermedades Infecciosas C.G.Malbran	Baumeister E. et al
Argentina/INEI020955/2020	EPI_ISL_849319	2020-06-11	Servicio Virosis Respiratorias-Departamento VirologÃ­a-INEI	Instituto Nacional Enfermedades Infecciosas C.G.Malbran	Baumeister E. et al
Argentina/INEI021840/2020	EPI_ISL_849296	2020-06-17	Servicio Virosis Respiratorias-Departamento VirologÃ­a-INEI	Instituto Nacional Enfermedades Infecciosas C.G.Malbran	Baumeister E. et al
Argentina/INEI021845/2020	EPI_ISL_849308	2020-06-17	Servicio Virosis Respiratorias-Departamento VirologÃ­a-INEI	Instituto Nacional Enfermedades Infecciosas C.G.Malbran	Baumeister E. et al
Argentina/INEI022085/2020	EPI_ISL_849305	2020-06-18	Servicio Virosis Respiratorias-Departamento VirologÃ­a-INEI	Instituto Nacional Enfermedades Infecciosas C.G.Malbran	Baumeister E. et al
Argentina/INEI022121/2020	EPI_ISL_849309	2020-06-18	Servicio Virosis Respiratorias-Departamento VirologÃ­a-INEI	Instituto Nacional Enfermedades Infecciosas C.G.Malbran	Baumeister E. et al
Argentina/INEI022890/2020	EPI_ISL_849310	2020-06-22	Servicio Virosis Respiratorias-Departamento VirologÃ­a-INEI	Instituto Nacional Enfermedades Infecciosas C.G.Malbran	Baumeister E. et al
Argentina/INEI023371/2020	EPI_ISL_849280	2020-06-26	Servicio Virosis Respiratorias-Departamento VirologÃ­a-INEI	Instituto Nacional Enfermedades Infecciosas C.G.Malbran	Baumeister E. et al
Argentina/INEI023486/2020	EPI_ISL_849279	2020-06-27	Servicio Virosis Respiratorias-Departamento VirologÃ­a-INEI	Instituto Nacional Enfermedades Infecciosas C.G.Malbran	Baumeister E. et al
Argentina/INEI023720/2020	EPI_ISL_849285	2020-06-29	Servicio Virosis Respiratorias-Departamento VirologÃ­a-INEI	Instituto Nacional Enfermedades Infecciosas C.G.Malbran	Baumeister E. et al
Argentina/INEI024145/2020	EPI_ISL_849306	2020-07-02	Servicio Virosis Respiratorias-Departamento VirologÃ­a-INEI	Instituto Nacional Enfermedades Infecciosas C.G.Malbran	Baumeister E. et al
Argentina/INEI024405/2020	EPI_ISL_849281	2020-07-04	Servicio Virosis Respiratorias-Departamento VirologÃ­a-INEI	Instituto Nacional Enfermedades Infecciosas C.G.Malbran	Baumeister E. et al
Argentina/INEI024795/2020	EPI_ISL_849292	2020-07-07	Servicio Virosis Respiratorias-Departamento VirologÃ­a-INEI	Instituto Nacional Enfermedades Infecciosas C.G.Malbran	Baumeister E. et al
Argentina/INEI025314/2020	EPI_ISL_849289	2020-07-10	Servicio Virosis Respiratorias-Departamento VirologÃ­a-INEI	Instituto Nacional Enfermedades Infecciosas C.G.Malbran	Baumeister E. et al
Argentina/INEI030336/2020	EPI_ISL_849288	2020-06-28	Servicio Virosis Respiratorias-Departamento VirologÃ­a-INEI	Instituto Nacional Enfermedades Infecciosas C.G.Malbran	Baumeister E. et al
Argentina/INEI030427/2020	EPI_ISL_849284	2020-06-28	Servicio Virosis Respiratorias-Departamento VirologÃ­a-INEI	Instituto Nacional Enfermedades Infecciosas C.G.Malbran	Baumeister E. et al
Argentina/INEI030694/2020	EPI_ISL_849297	2020-06-29	Servicio Virosis Respiratorias-Departamento VirologÃ­a-INEI	Instituto Nacional Enfermedades Infecciosas C.G.Malbran	Baumeister E. et al
Argentina/INEI030804/2020	EPI_ISL_849282	2020-06-30	Servicio Virosis Respiratorias-Departamento VirologÃ­a-INEI	Instituto Nacional Enfermedades Infecciosas C.G.Malbran	Baumeister E. et al
Argentina/INEI031614/2020	EPI_ISL_849320	2020-07-04	Servicio Virosis Respiratorias-Departamento VirologÃ­a-INEI	Instituto Nacional Enfermedades Infecciosas C.G.Malbran	Baumeister E. et al
Argentina/INEI031617/2020	EPI_ISL_849317	2020-07-04	Servicio Virosis Respiratorias-Departamento VirologÃ­a-INEI	Instituto Nacional Enfermedades Infecciosas C.G.Malbran	Baumeister E. et al
Argentina/INEI031619/2020	EPI_ISL_849311	2020-07-04	Servicio Virosis Respiratorias-Departamento VirologÃ­a-INEI	Instituto Nacional Enfermedades Infecciosas C.G.Malbran	Baumeister E. et al
Argentina/INEI031669/2020	EPI_ISL_849312	2020-07-04	Servicio Virosis Respiratorias-Departamento VirologÃ­a-INEI	Instituto Nacional Enfermedades Infecciosas C.G.Malbran	Baumeister E. et al
Argentina/INEI031683/2020	EPI_ISL_849302	2020-07-04	Servicio Virosis Respiratorias-Departamento VirologÃ­a-INEI	Instituto Nacional Enfermedades Infecciosas C.G.Malbran	Baumeister E. et al
Argentina/INEI032121/2020	EPI_ISL_849291	2020-07-06	Servicio Virosis Respiratorias-Departamento VirologÃ­a-INEI	Instituto Nacional Enfermedades Infecciosas C.G.Malbran	Baumeister E. et al
Argentina/INEI040154/2020	EPI_ISL_849321	2020-06-19	Servicio Virosis Respiratorias-Departamento VirologÃ­a-INEI	Instituto Nacional Enfermedades Infecciosas C.G.Malbran	Baumeister E. et al
Argentina/INEI040157/2020	EPI_ISL_849313	2020-06-19	Servicio Virosis Respiratorias-Departamento VirologÃ­a-INEI	Instituto Nacional Enfermedades Infecciosas C.G.Malbran	Baumeister E. et al
Argentina/INEI041082/2020	EPI_ISL_849314	2020-06-24	Servicio Virosis Respiratorias-Departamento VirologÃ­a-INEI	Instituto Nacional Enfermedades Infecciosas C.G.Malbran	Baumeister E. et al
Argentina/INEI041319/2020	EPI_ISL_849303	2020-06-25	Servicio Virosis Respiratorias-Departamento VirologÃ­a-INEI	Instituto Nacional Enfermedades Infecciosas C.G.Malbran	Baumeister E. et al
Argentina/INEI041399/2020	EPI_ISL_849304	2020-06-25	Servicio Virosis Respiratorias-Departamento VirologÃ­a-INEI	Instituto Nacional Enfermedades Infecciosas C.G.Malbran	Baumeister E. et al
Argentina/INEI041590/2020	EPI_ISL_849315	2020-06-26	Servicio Virosis Respiratorias-Departamento VirologÃ­a-INEI	Instituto Nacional Enfermedades Infecciosas C.G.Malbran	Baumeister E. et al
Argentina/INEI041592/2020	EPI_ISL_849316	2020-06-26	Servicio Virosis Respiratorias-Departamento VirologÃ­a-INEI	Instituto Nacional Enfermedades Infecciosas C.G.Malbran	Baumeister E. et al
Argentina/INEI082860/2020	EPI_ISL_849373	2020-10-08	Servicio Virosis Respiratorias-Departamento VirologÃ­a-INEI	Instituto Nacional Enfermedades Infecciosas C.G.Malbran	Baumeister E. et al
Argentina/INEI082862/2020	EPI_ISL_849374	2020-10-08	Servicio Virosis Respiratorias-Departamento VirologÃ­a-INEI	Instituto Nacional Enfermedades Infecciosas C.G.Malbran	Baumeister E. et al
Argentina/INEI082916/2020	EPI_ISL_849375	2020-10-08	Servicio Virosis Respiratorias-Departamento VirologÃ­a-INEI	Instituto Nacional Enfermedades Infecciosas C.G.Malbran	Baumeister E. et al
Argentina/INEI092516/2020	EPI_ISL_849376	2020-10-09	Servicio Virosis Respiratorias-Departamento VirologÃ­a-INEI	Instituto Nacional Enfermedades Infecciosas C.G.Malbran	Baumeister E. et al
Argentina/INEI092571/2020	EPI_ISL_849377	2020-10-09	Servicio Virosis Respiratorias-Departamento VirologÃ­a-INEI	Instituto Nacional Enfermedades Infecciosas C.G.Malbran	Baumeister E. et al
Argentina/INEI092580/2020	EPI_ISL_849378	2020-10-09	Servicio Virosis Respiratorias-Departamento VirologÃ­a-INEI	Instituto Nacional Enfermedades Infecciosas C.G.Malbran	Baumeister E. et al
Argentina/INEI092593/2020	EPI_ISL_849379	2020-10-09	Servicio Virosis Respiratorias-Departamento VirologÃ­a-INEI	Instituto Nacional Enfermedades Infecciosas C.G.Malbran	Baumeister E. et al
Argentina/INEI092810/2020	EPI_ISL_849380	2020-10-10	Servicio Virosis Respiratorias-Departamento VirologÃ­a-INEI	Instituto Nacional Enfermedades Infecciosas C.G.Malbran	Baumeister E. et al
Argentina/INEI092813/2020	EPI_ISL_849381	2020-10-10	Servicio Virosis Respiratorias-Departamento VirologÃ­a-INEI	Instituto Nacional Enfermedades Infecciosas C.G.Malbran	Baumeister E. et al
Argentina/INEI092843/2020	EPI_ISL_849382	2020-10-09	Servicio Virosis Respiratorias-Departamento VirologÃ­a-INEI	Instituto Nacional Enfermedades Infecciosas C.G.Malbran	Baumeister E. et al
Argentina/INEI095222/2020	EPI_ISL_849350	2020-10-16	Servicio Virosis Respiratorias-Departamento VirologÃ­a-INEI	Instituto Nacional Enfermedades Infecciosas C.G.Malbran	Baumeister E. et al
Argentina/INEI095228/2020	EPI_ISL_849351	2020-10-16	Servicio Virosis Respiratorias-Departamento VirologÃ­a-INEI	Instituto Nacional Enfermedades Infecciosas C.G.Malbran	Baumeister E. et al
Argentina/INEI095276/2020	EPI_ISL_849352	2020-10-19	Servicio Virosis Respiratorias-Departamento VirologÃ­a-INEI	Instituto Nacional Enfermedades Infecciosas C.G.Malbran	Baumeister E. et al
Argentina/INEI095283/2020	EPI_ISL_849353	2020-10-15	Servicio Virosis Respiratorias-Departamento VirologÃ­a-INEI	Instituto Nacional Enfermedades Infecciosas C.G.Malbran	Baumeister E. et al
Argentina/INEI095287/2020	EPI_ISL_849354	2020-10-15	Servicio Virosis Respiratorias-Departamento VirologÃ­a-INEI	Instituto Nacional Enfermedades Infecciosas C.G.Malbran	Baumeister E. et al
Argentina/INEI095357/2020	EPI_ISL_849355	2020-10-19	Servicio Virosis Respiratorias-Departamento VirologÃ­a-INEI	Instituto Nacional Enfermedades Infecciosas C.G.Malbran	Baumeister E. et al
Argentina/INEI095413/2020	EPI_ISL_849356	2020-10-19	Servicio Virosis Respiratorias-Departamento VirologÃ­a-INEI	Instituto Nacional Enfermedades Infecciosas C.G.Malbran	Baumeister E. et al
Argentina/INEI095421/2020	EPI_ISL_849357	2020-10-16	Servicio Virosis Respiratorias-Departamento VirologÃ­a-INEI	Instituto Nacional Enfermedades Infecciosas C.G.Malbran	Baumeister E. et al
Argentina/INEI095450/2020	EPI_ISL_849358	2020-10-19	Servicio Virosis Respiratorias-Departamento VirologÃ­a-INEI	Instituto Nacional Enfermedades Infecciosas C.G.Malbran	Baumeister E. et al
Argentina/INEI095503/2020	EPI_ISL_849359	2020-10-20	Servicio Virosis Respiratorias-Departamento VirologÃ­a-INEI	Instituto Nacional Enfermedades Infecciosas C.G.Malbran	Baumeister E. et al
Argentina/INEI095573/2020	EPI_ISL_849360	2020-10-16	Servicio Virosis Respiratorias-Departamento VirologÃ­a-INEI	Instituto Nacional Enfermedades Infecciosas C.G.Malbran	Baumeister E. et al
Argentina/INEI095579/2020	EPI_ISL_849361	2020-10-16	Servicio Virosis Respiratorias-Departamento VirologÃ­a-INEI	Instituto Nacional Enfermedades Infecciosas C.G.Malbran	Baumeister E. et al
Argentina/INEI095674/2020	EPI_ISL_849362	2020-10-17	Servicio Virosis Respiratorias-Departamento VirologÃ­a-INEI	Instituto Nacional Enfermedades Infecciosas C.G.Malbran	Baumeister E. et al
Argentina/INEI095695/2020	EPI_ISL_849363	2020-10-16	Servicio Virosis Respiratorias-Departamento VirologÃ­a-INEI	Instituto Nacional Enfermedades Infecciosas C.G.Malbran	Baumeister E. et al
Argentina/INEI095845/2020	EPI_ISL_849364	2020-10-22	Servicio Virosis Respiratorias-Departamento VirologÃ­a-INEI	Instituto Nacional Enfermedades Infecciosas C.G.Malbran	Baumeister E. et al
Argentina/INEI095952/2020	EPI_ISL_849365	2020-10-21	Servicio Virosis Respiratorias-Departamento VirologÃ­a-INEI	Instituto Nacional Enfermedades Infecciosas C.G.Malbran	Baumeister E. et al
Argentina/INEI095955/2020	EPI_ISL_849366	2020-10-21	Servicio Virosis Respiratorias-Departamento VirologÃ­a-INEI	Instituto Nacional Enfermedades Infecciosas C.G.Malbran	Baumeister E. et al
Argentina/INEI095994/2020	EPI_ISL_849367	2020-10-18	Servicio Virosis Respiratorias-Departamento VirologÃ­a-INEI	Instituto Nacional Enfermedades Infecciosas C.G.Malbran	Baumeister E. et al
Argentina/INEI096021/2020	EPI_ISL_849368	2020-10-22	Servicio Virosis Respiratorias-Departamento VirologÃ­a-INEI	Instituto Nacional Enfermedades Infecciosas C.G.Malbran	Baumeister E. et al
Argentina/INEI096022/2020	EPI_ISL_849369	2020-10-22	Servicio Virosis Respiratorias-Departamento VirologÃ­a-INEI	Instituto Nacional Enfermedades Infecciosas C.G.Malbran	Baumeister E. et al
Argentina/INEI096077/2020	EPI_ISL_849370	2020-10-23	Servicio Virosis Respiratorias-Departamento VirologÃ­a-INEI	Instituto Nacional Enfermedades Infecciosas C.G.Malbran	Baumeister E. et al
Argentina/INEI096084/2020	EPI_ISL_849371	2020-10-24	Servicio Virosis Respiratorias-Departamento VirologÃ­a-INEI	Instituto Nacional Enfermedades Infecciosas C.G.Malbran	Baumeister E. et al
Argentina/INEI096204/2020	EPI_ISL_849372	2020-10-26	Servicio Virosis Respiratorias-Departamento VirologÃ­a-INEI	Instituto Nacional Enfermedades Infecciosas C.G.Malbran	Baumeister E. et al
Argentina/INEI096222/2020	EPI_ISL_856790	2020-10-27	Servicio Virosis Respiratorias-Departamento VirologÃ­a-INEI	Instituto Nacional Enfermedades Infecciosas C.G.Malbran	Baumeister E. et al
Argentina/INEI096223/2020	EPI_ISL_856791	2020-10-27	Servicio Virosis Respiratorias-Departamento VirologÃ­a-INEI	Instituto Nacional Enfermedades Infecciosas C.G.Malbran	Baumeister E. et al
Argentina/INEI096269/2020	EPI_ISL_856792	2020-10-28	Servicio Virosis Respiratorias-Departamento VirologÃ­a-INEI	Instituto Nacional Enfermedades Infecciosas C.G.Malbran	Baumeister E. et al
Argentina/INEI096300/2020	EPI_ISL_856793	2020-10-28	Servicio Virosis Respiratorias-Departamento VirologÃ­a-INEI	Instituto Nacional Enfermedades Infecciosas C.G.Malbran	Baumeister E. et al
Argentina/INEI096305/2020	EPI_ISL_856794	2020-10-31	Servicio Virosis Respiratorias-Departamento VirologÃ­a-INEI	Instituto Nacional Enfermedades Infecciosas C.G.Malbran	Baumeister E. et al
Argentina/INEI096315/2020	EPI_ISL_856795	2020-10-31	Servicio Virosis Respiratorias-Departamento VirologÃ­a-INEI	Instituto Nacional Enfermedades Infecciosas C.G.Malbran	Baumeister E. et al
Argentina/INEI096359/2020	EPI_ISL_856796	2020-10-30	Servicio Virosis Respiratorias-Departamento VirologÃ­a-INEI	Instituto Nacional Enfermedades Infecciosas C.G.Malbran	Baumeister E. et al
Argentina/INEI096369/2020	EPI_ISL_856797	2020-11-02	Servicio Virosis Respiratorias-Departamento VirologÃ­a-INEI	Instituto Nacional Enfermedades Infecciosas C.G.Malbran	Baumeister E. et al
Argentina/INEI096397/2020	EPI_ISL_856798	2020-11-02	Servicio Virosis Respiratorias-Departamento VirologÃ­a-INEI	Instituto Nacional Enfermedades Infecciosas C.G.Malbran	Baumeister E. et al
Argentina/INEI096418/2020	EPI_ISL_856799	2020-11-03	Servicio Virosis Respiratorias-Departamento VirologÃ­a-INEI	Instituto Nacional Enfermedades Infecciosas C.G.Malbran	Baumeister E. et al
Argentina/INEI096492/2020	EPI_ISL_856800	2020-11-04	Servicio Virosis Respiratorias-Departamento VirologÃ­a-INEI	Instituto Nacional Enfermedades Infecciosas C.G.Malbran	Baumeister E. et al
Argentina/INEI096522/2020	EPI_ISL_856801	2020-11-06	Servicio Virosis Respiratorias-Departamento VirologÃ­a-INEI	Instituto Nacional Enfermedades Infecciosas C.G.Malbran	Baumeister E. et al
Argentina/INEI097130/2020	EPI_ISL_856760	2020-11-18	Servicio Virosis Respiratorias-Departamento VirologÃ­a-INEI	Instituto Nacional Enfermedades Infecciosas C.G.Malbran	Baumeister E. et al
Argentina/INEI097145/2020	EPI_ISL_856761	2020-11-20	Servicio Virosis Respiratorias-Departamento VirologÃ­a-INEI	Instituto Nacional Enfermedades Infecciosas C.G.Malbran	Baumeister E. et al
Argentina/INEI097148/2020	EPI_ISL_856762	2020-11-20	Servicio Virosis Respiratorias-Departamento VirologÃ­a-INEI	Instituto Nacional Enfermedades Infecciosas C.G.Malbran	Baumeister E. et al
Argentina/INEI097176/2020	EPI_ISL_856763	2020-11-20	Servicio Virosis Respiratorias-Departamento VirologÃ­a-INEI	Instituto Nacional Enfermedades Infecciosas C.G.Malbran	Baumeister E. et al
Argentina/INEI097191/2020	EPI_ISL_856764	2020-11-25	Servicio Virosis Respiratorias-Departamento VirologÃ­a-INEI	Instituto Nacional Enfermedades Infecciosas C.G.Malbran	Baumeister E. et al
Argentina/INEI097210/2020	EPI_ISL_856765	2020-11-24	Servicio Virosis Respiratorias-Departamento VirologÃ­a-INEI	Instituto Nacional Enfermedades Infecciosas C.G.Malbran	Baumeister E. et al
Argentina/INEI097339/2020	EPI_ISL_856766	2020-11-26	Servicio Virosis Respiratorias-Departamento VirologÃ­a-INEI	Instituto Nacional Enfermedades Infecciosas C.G.Malbran	Baumeister E. et al
Argentina/INEI097370/2020	EPI_ISL_856767	2020-11-25	Servicio Virosis Respiratorias-Departamento VirologÃ­a-INEI	Instituto Nacional Enfermedades Infecciosas C.G.Malbran	Baumeister E. et al
Argentina/INEI097373/2020	EPI_ISL_856768	2020-11-25	Servicio Virosis Respiratorias-Departamento VirologÃ­a-INEI	Instituto Nacional Enfermedades Infecciosas C.G.Malbran	Baumeister E. et al
Argentina/INEI097375/2020	EPI_ISL_856769	2020-11-25	Servicio Virosis Respiratorias-Departamento VirologÃ­a-INEI	Instituto Nacional Enfermedades Infecciosas C.G.Malbran	Baumeister E. et al
Argentina/INEI097378/2020	EPI_ISL_856770	2020-11-25	Servicio Virosis Respiratorias-Departamento VirologÃ­a-INEI	Instituto Nacional Enfermedades Infecciosas C.G.Malbran	Baumeister E. et al
Argentina/INEI097387/2020	EPI_ISL_856771	2020-11-28	Servicio Virosis Respiratorias-Departamento VirologÃ­a-INEI	Instituto Nacional Enfermedades Infecciosas C.G.Malbran	Baumeister E. et al
Argentina/INEI097659/2020	EPI_ISL_856772	2020-12-01	Servicio Virosis Respiratorias-Departamento VirologÃ­a-INEI	Instituto Nacional Enfermedades Infecciosas C.G.Malbran	Baumeister E. et al
Argentina/INEI097697/2020	EPI_ISL_856773	2020-12-02	Servicio Virosis Respiratorias-Departamento VirologÃ­a-INEI	Instituto Nacional Enfermedades Infecciosas C.G.Malbran	Baumeister E. et al
Argentina/INEI097811/2020	EPI_ISL_856774	2020-12-03	Servicio Virosis Respiratorias-Departamento VirologÃ­a-INEI	Instituto Nacional Enfermedades Infecciosas C.G.Malbran	Baumeister E. et al
Argentina/INEI097815/2020	EPI_ISL_856775	2020-12-03	Servicio Virosis Respiratorias-Departamento VirologÃ­a-INEI	Instituto Nacional Enfermedades Infecciosas C.G.Malbran	Baumeister E. et al
Argentina/INEI098414/2020	EPI_ISL_856776	2020-12-09	Servicio Virosis Respiratorias-Departamento VirologÃ­a-INEI	Instituto Nacional Enfermedades Infecciosas C.G.Malbran	Baumeister E. et al
Argentina/INEI098418/2020	EPI_ISL_856777	2020-12-04	Servicio Virosis Respiratorias-Departamento VirologÃ­a-INEI	Instituto Nacional Enfermedades Infecciosas C.G.Malbran	Baumeister E. et al
Argentina/INEI098420/2020	EPI_ISL_856778	2020-12-04	Servicio Virosis Respiratorias-Departamento VirologÃ­a-INEI	Instituto Nacional Enfermedades Infecciosas C.G.Malbran	Baumeister E. et al
Argentina/INEI098437/2020	EPI_ISL_856779	2020-12-06	Servicio Virosis Respiratorias-Departamento VirologÃ­a-INEI	Instituto Nacional Enfermedades Infecciosas C.G.Malbran	Baumeister E. et al
Argentina/INEI098447/2020	EPI_ISL_856780	2020-12-09	Servicio Virosis Respiratorias-Departamento VirologÃ­a-INEI	Instituto Nacional Enfermedades Infecciosas C.G.Malbran	Baumeister E. et al
Argentina/INEI098448/2020	EPI_ISL_856781	2020-12-09	Servicio Virosis Respiratorias-Departamento VirologÃ­a-INEI	Instituto Nacional Enfermedades Infecciosas C.G.Malbran	Baumeister E. et al
Argentina/INEI098454/2020	EPI_ISL_856782	2020-12-09	Servicio Virosis Respiratorias-Departamento VirologÃ­a-INEI	Instituto Nacional Enfermedades Infecciosas C.G.Malbran	Baumeister E. et al
Argentina/INEI098490/2020	EPI_ISL_856783	2020-12-10	Servicio Virosis Respiratorias-Departamento VirologÃ­a-INEI	Instituto Nacional Enfermedades Infecciosas C.G.Malbran	Baumeister E. et al
Argentina/INEI098521/2020	EPI_ISL_856784	2020-12-11	Servicio Virosis Respiratorias-Departamento VirologÃ­a-INEI	Instituto Nacional Enfermedades Infecciosas C.G.Malbran	Baumeister E. et al
Argentina/INEI098536/2020	EPI_ISL_856785	2020-12-15	Servicio Virosis Respiratorias-Departamento VirologÃ­a-INEI	Instituto Nacional Enfermedades Infecciosas C.G.Malbran	Baumeister E. et al
Argentina/INEI098554/2020	EPI_ISL_856786	2020-12-13	Servicio Virosis Respiratorias-Departamento VirologÃ­a-INEI	Instituto Nacional Enfermedades Infecciosas C.G.Malbran	Baumeister E. et al
Argentina/INEI098558/2020	EPI_ISL_856787	2020-12-14	Servicio Virosis Respiratorias-Departamento VirologÃ­a-INEI	Instituto Nacional Enfermedades Infecciosas C.G.Malbran	Baumeister E. et al
Argentina/INEI098603/2020	EPI_ISL_856788	2020-12-16	Servicio Virosis Respiratorias-Departamento VirologÃ­a-INEI	Instituto Nacional Enfermedades Infecciosas C.G.Malbran	Baumeister E. et al
Argentina/INEI098730/2020	EPI_ISL_856789	2020-12-21	Servicio Virosis Respiratorias-Departamento VirologÃ­a-INEI	Instituto Nacional Enfermedades Infecciosas C.G.Malbran	Baumeister E. et al
Argentina/INEI098807/2020	EPI_ISL_856756	2020-12-21	Servicio Virosis Respiratorias-Departamento VirologÃ­a-INEI	Instituto Nacional Enfermedades Infecciosas C.G.Malbran	Baumeister E. et al
Argentina/INEI099212/2020	EPI_ISL_856757	2020-12-24	Servicio Virosis Respiratorias-Departamento VirologÃ­a-INEI	Instituto Nacional Enfermedades Infecciosas C.G.Malbran	Baumeister E. et al
Argentina/INEI099213/2020	EPI_ISL_856758	2020-12-24	Servicio Virosis Respiratorias-Departamento VirologÃ­a-INEI	Instituto Nacional Enfermedades Infecciosas C.G.Malbran	Baumeister E. et al
Argentina/INEI099214/2020	EPI_ISL_856759	2020-12-24	Servicio Virosis Respiratorias-Departamento VirologÃ­a-INEI	Instituto Nacional Enfermedades Infecciosas C.G.Malbran	Baumeister E. et al
Argentina/PAIS-A0001/2020	EPI_ISL_430793	2020-03-01	Laboratorio AnÃ¡lisis ClÃ­nicos, Unidad de Servicios DiagnÃ³sticos, Swiss Medical Group	Ãrea de SecuenciaciÃ³n del Laboratorio de VirologÃ­a del Hospital de NiÃ±os Dr. Ricardo Gutierrez on behalf of 'Proyecto Argentino Interinstitucional de genomica de SARS-CoV-2' (PAIS Consortium)	Nabaes Jodar et al
Argentina/PAIS-A0002/2020	EPI_ISL_430794	2020-03-24	Laboratorio AnÃ¡lisis ClÃ­nicos, Unidad de Servicios DiagnÃ³sticos, Swiss Medical Group	Ãrea de SecuenciaciÃ³n del Laboratorio de VirologÃ­a del Hospital de NiÃ±os Dr. Ricardo Gutierrez on behalf of 'Proyecto Argentino Interinstitucional de genomica de SARS-CoV-2' (PAIS Consortium)	Nabaes Jodar et al
Argentina/PAIS-A0003/2020	EPI_ISL_430795	2020-03-26	Laboratorio de VirologÃ­a del Hospital de NiÃ±os Dr. Ricardo Gutierrez	Ãrea de SecuenciaciÃ³n del Laboratorio de VirologÃ­a del Hospital de NiÃ±os Dr. Ricardo Gutierrez on behalf of 'Proyecto Argentino Interinstitucional de genomica de SARS-CoV-2' (PAIS Consortium)	Nabaes Jodar et al
Argentina/PAIS-A0004/2020	EPI_ISL_430796	2020-03-27	Departamento de BiologÃ­a y genÃ©tica molecular, IACA Laboratorios.	Ãrea de SecuenciaciÃ³n del Laboratorio de VirologÃ­a del Hospital de NiÃ±os Dr. Ricardo Gutierrez on behalf of 'Proyecto Argentino Interinstitucional de genomica de SARS-CoV-2' (PAIS Consortium)	Nabaes Jodar et al
Argentina/PAIS-A0005/2020	EPI_ISL_430797	2020-03-27	Departamento de BiologÃ­a y genÃ©tica molecular, IACA Laboratorios.	Ãrea de SecuenciaciÃ³n del Laboratorio de VirologÃ­a del Hospital de NiÃ±os Dr. Ricardo Gutierrez on behalf of 'Proyecto Argentino Interinstitucional de genomica de SARS-CoV-2' (PAIS Consortium)	Nabaes Jodar et al
Argentina/PAIS-A0006/2020	EPI_ISL_430798	2020-03-28	Departamento de BiologÃ­a y genÃ©tica molecular, IACA Laboratorios.	Ãrea de SecuenciaciÃ³n del Laboratorio de VirologÃ­a del Hospital de NiÃ±os Dr. Ricardo Gutierrez on behalf of 'Proyecto Argentino Interinstitucional de genomica de SARS-CoV-2' (PAIS Consortium)	Nabaes Jodar et al
Argentina/PAIS-A0007/2020	EPI_ISL_430799	2020-03-30	Laboratorio de VirologÃ­a del Hospital de NiÃ±os Dr. Ricardo Gutierrez	Ãrea de SecuenciaciÃ³n del Laboratorio de VirologÃ­a del Hospital de NiÃ±os Dr. Ricardo Gutierrez on behalf of 'Proyecto Argentino Interinstitucional de genomica de SARS-CoV-2' (PAIS Consortium)	Nabaes Jodar et al
Argentina/PAIS-A0008/2020	EPI_ISL_430800	2020-03-30	Laboratorio de VirologÃ­a del Hospital de NiÃ±os Dr. Ricardo Gutierrez	Ãrea de SecuenciaciÃ³n del Laboratorio de VirologÃ­a del Hospital de NiÃ±os Dr. Ricardo Gutierrez on behalf of 'Proyecto Argentino Interinstitucional de genomica de SARS-CoV-2' (PAIS Consortium)	Nabaes Jodar et al
Argentina/PAIS-A0009/2020	EPI_ISL_430801	2020-03-31	Laboratorio de VirologÃ­a del Hospital de NiÃ±os Dr. Ricardo Gutierrez	Ãrea de SecuenciaciÃ³n del Laboratorio de VirologÃ­a del Hospital de NiÃ±os Dr. Ricardo Gutierrez on behalf of 'Proyecto Argentino Interinstitucional de genomica de SARS-CoV-2' (PAIS Consortium)	Nabaes Jodar et al
Argentina/PAIS-A0010/2020	EPI_ISL_793013	2020-03-31	Laboratorio de VirologÃ­a del Hospital de NiÃ±os Dr. Ricardo Gutierrez	Ãrea de SecuenciaciÃ³n del Laboratorio de VirologÃ­a del Hospital de NiÃ±os Dr. Ricardo Gutierrez on behalf of 'Proyecto Argentino Interinstitucional de genomica de SARS-CoV-2' (PAIS Consortium)	Nabaes Jodar et al
Argentina/PAIS-A0011/2020	EPI_ISL_430802	2020-03-31	Departamento de BiologÃ­a y genÃ©tica molecular, IACA Laboratorios.	Ãrea de SecuenciaciÃ³n del Laboratorio de VirologÃ­a del Hospital de NiÃ±os Dr. Ricardo Gutierrez on behalf of 'Proyecto Argentino Interinstitucional de genomica de SARS-CoV-2' (PAIS Consortium)	Nabaes Jodar et al
Argentina/PAIS-A0012/2020	EPI_ISL_430803	2020-04-01	Laboratorio de VirologÃ­a del Hospital de NiÃ±os Dr. Ricardo Gutierrez	Ãrea de SecuenciaciÃ³n del Laboratorio de VirologÃ­a del Hospital de NiÃ±os Dr. Ricardo Gutierrez on behalf of 'Proyecto Argentino Interinstitucional de genomica de SARS-CoV-2' (PAIS Consortium)	Nabaes Jodar et al
Argentina/PAIS-A0013/2020	EPI_ISL_430804	2020-04-01	Laboratorio de VirologÃ­a del Hospital de NiÃ±os Dr. Ricardo Gutierrez	Ãrea de SecuenciaciÃ³n del Laboratorio de VirologÃ­a del Hospital de NiÃ±os Dr. Ricardo Gutierrez on behalf of 'Proyecto Argentino Interinstitucional de genomica de SARS-CoV-2' (PAIS Consortium)	Nabaes Jodar et al
Argentina/PAIS-A0014/2020	EPI_ISL_430805	2020-04-01	Departamento de BiologÃ­a y genÃ©tica molecular, IACA Laboratorios.	Ãrea de SecuenciaciÃ³n del Laboratorio de VirologÃ­a del Hospital de NiÃ±os Dr. Ricardo Gutierrez on behalf of 'Proyecto Argentino Interinstitucional de genomica de SARS-CoV-2' (PAIS Consortium)	Nabaes Jodar et al
Argentina/PAIS-A0015/2020	EPI_ISL_430806	2020-04-01	Departamento de BiologÃ­a y genÃ©tica molecular, IACA Laboratorios.	Ãrea de SecuenciaciÃ³n del Laboratorio de VirologÃ­a del Hospital de NiÃ±os Dr. Ricardo Gutierrez on behalf of 'Proyecto Argentino Interinstitucional de genomica de SARS-CoV-2' (PAIS Consortium)	Nabaes Jodar et al
Argentina/PAIS-A0016/2020	EPI_ISL_430807	2020-04-02	Laboratorio de VirologÃ­a del Hospital de NiÃ±os Dr. Ricardo Gutierrez	Ãrea de SecuenciaciÃ³n del Laboratorio de VirologÃ­a del Hospital de NiÃ±os Dr. Ricardo Gutierrez on behalf of 'Proyecto Argentino Interinstitucional de genomica de SARS-CoV-2' (PAIS Consortium)	Nabaes Jodar et al
Argentina/PAIS-A0017/2020	EPI_ISL_430808	2020-04-03	Departamento de BiologÃ­a y genÃ©tica molecular, IACA Laboratorios.	Ãrea de SecuenciaciÃ³n del Laboratorio de VirologÃ­a del Hospital de NiÃ±os Dr. Ricardo Gutierrez on behalf of 'Proyecto Argentino Interinstitucional de genomica de SARS-CoV-2' (PAIS Consortium)	Nabaes Jodar et al
Argentina/PAIS-A0018/2020	EPI_ISL_430809	2020-04-04	Laboratorio de VirologÃ­a del Hospital de NiÃ±os Dr. Ricardo Gutierrez	Ãrea de SecuenciaciÃ³n del Laboratorio de VirologÃ­a del Hospital de NiÃ±os Dr. Ricardo Gutierrez on behalf of 'Proyecto Argentino Interinstitucional de genomica de SARS-CoV-2' (PAIS Consortium)	Nabaes Jodar et al
Argentina/PAIS-A0019/2020	EPI_ISL_430810	2020-04-07	Laboratorio de VirologÃ­a del Hospital de NiÃ±os Dr. Ricardo Gutierrez	Ãrea de SecuenciaciÃ³n del Laboratorio de VirologÃ­a del Hospital de NiÃ±os Dr. Ricardo Gutierrez on behalf of 'Proyecto Argentino Interinstitucional de genomica de SARS-CoV-2' (PAIS Consortium)	Nabaes Jodar et al
Argentina/PAIS-A0020/2020	EPI_ISL_430811	2020-04-11	Laboratorio de VirologÃ­a del Hospital de NiÃ±os Dr. Ricardo Gutierrez	Ãrea de SecuenciaciÃ³n del Laboratorio de VirologÃ­a del Hospital de NiÃ±os Dr. Ricardo Gutierrez on behalf of 'Proyecto Argentino Interinstitucional de genomica de SARS-CoV-2' (PAIS Consortium)	Nabaes Jodar et al
Argentina/PAIS-A0021/2020	EPI_ISL_430812	2020-04-11	Laboratorio de VirologÃ­a del Hospital de NiÃ±os Dr. Ricardo Gutierrez	Ãrea de SecuenciaciÃ³n del Laboratorio de VirologÃ­a del Hospital de NiÃ±os Dr. Ricardo Gutierrez on behalf of 'Proyecto Argentino Interinstitucional de genomica de SARS-CoV-2' (PAIS Consortium)	Nabaes Jodar et al
Argentina/PAIS-A0022/2020	EPI_ISL_430813	2020-04-11	Laboratorio de VirologÃ­a del Hospital de NiÃ±os Dr. Ricardo Gutierrez	Ãrea de SecuenciaciÃ³n del Laboratorio de VirologÃ­a del Hospital de NiÃ±os Dr. Ricardo Gutierrez on behalf of 'Proyecto Argentino Interinstitucional de genomica de SARS-CoV-2' (PAIS Consortium)	Nabaes Jodar et al
Argentina/PAIS-A0023/2020	EPI_ISL_430814	2020-04-17	Laboratorio de VirologÃ­a del Hospital de NiÃ±os Dr. Ricardo Gutierrez	Ãrea de SecuenciaciÃ³n del Laboratorio de VirologÃ­a del Hospital de NiÃ±os Dr. Ricardo Gutierrez on behalf of 'Proyecto Argentino Interinstitucional de genomica de SARS-CoV-2' (PAIS Consortium)	Nabaes Jodar et al
Argentina/PAIS-A0024/2020	EPI_ISL_430815	2020-04-18	Laboratorio de VirologÃ­a del Hospital de NiÃ±os Dr. Ricardo Gutierrez	Ãrea de SecuenciaciÃ³n del Laboratorio de VirologÃ­a del Hospital de NiÃ±os Dr. Ricardo Gutierrez on behalf of 'Proyecto Argentino Interinstitucional de genomica de SARS-CoV-2' (PAIS Consortium)	Nabaes Jodar et al
Argentina/PAIS-A0025/2020	EPI_ISL_430816	2020-04-18	Laboratorio de VirologÃ­a del Hospital de NiÃ±os Dr. Ricardo Gutierrez	Ãrea de SecuenciaciÃ³n del Laboratorio de VirologÃ­a del Hospital de NiÃ±os Dr. Ricardo Gutierrez on behalf of 'Proyecto Argentino Interinstitucional de genomica de SARS-CoV-2' (PAIS Consortium)	Nabaes Jodar et al
Argentina/PAIS-A0026/2020	EPI_ISL_430817	2020-04-18	Laboratorio de VirologÃ­a del Hospital de NiÃ±os Dr. Ricardo Gutierrez	Ãrea de SecuenciaciÃ³n del Laboratorio de VirologÃ­a del Hospital de NiÃ±os Dr. Ricardo Gutierrez on behalf of 'Proyecto Argentino Interinstitucional de genomica de SARS-CoV-2' (PAIS Consortium)	Nabaes Jodar et al
Argentina/PAIS-A0027/2020	EPI_ISL_430818	2020-04-19	Laboratorio de VirologÃ­a del Hospital de NiÃ±os Dr. Ricardo Gutierrez	Ãrea de SecuenciaciÃ³n del Laboratorio de VirologÃ­a del Hospital de NiÃ±os Dr. Ricardo Gutierrez on behalf of 'Proyecto Argentino Interinstitucional de genomica de SARS-CoV-2' (PAIS Consortium)	Nabaes Jodar et al
Argentina/PAIS-A0028/2020	EPI_ISL_792117	2020-04-21	Laboratorio de VirologÃ­a del Hospital de NiÃ±os Dr. Ricardo Gutierrez	Ãrea de SecuenciaciÃ³n del Laboratorio de VirologÃ­a del Hospital de NiÃ±os Dr. Ricardo Gutierrez on behalf of 'Proyecto Argentino Interinstitucional de genomica de SARS-CoV-2' (PAIS Consortium)	Nabaes Jodar et al
Argentina/PAIS-A0029/2020	EPI_ISL_792118	2020-04-24	Laboratorio de VirologÃ­a del Hospital de NiÃ±os Dr. Ricardo Gutierrez	Ãrea de SecuenciaciÃ³n del Laboratorio de VirologÃ­a del Hospital de NiÃ±os Dr. Ricardo Gutierrez on behalf of 'Proyecto Argentino Interinstitucional de genomica de SARS-CoV-2' (PAIS Consortium)	Nabaes Jodar et al
Argentina/PAIS-A0030/2020	EPI_ISL_792119	2020-04-24	Laboratorio de VirologÃ­a del Hospital de NiÃ±os Dr. Ricardo Gutierrez	Ãrea de SecuenciaciÃ³n del Laboratorio de VirologÃ­a del Hospital de NiÃ±os Dr. Ricardo Gutierrez on behalf of 'Proyecto Argentino Interinstitucional de genomica de SARS-CoV-2' (PAIS Consortium)	Nabaes Jodar et al
Argentina/PAIS-A0031/2020	EPI_ISL_792120	2020-04-24	Laboratorio de VirologÃ­a del Hospital de NiÃ±os Dr. Ricardo Gutierrez	Ãrea de SecuenciaciÃ³n del Laboratorio de VirologÃ­a del Hospital de NiÃ±os Dr. Ricardo Gutierrez on behalf of 'Proyecto Argentino Interinstitucional de genomica de SARS-CoV-2' (PAIS Consortium)	Nabaes Jodar et al
Argentina/PAIS-A0032/2020	EPI_ISL_792121	2020-04-24	Laboratorio de VirologÃ­a del Hospital de NiÃ±os Dr. Ricardo Gutierrez	Ãrea de SecuenciaciÃ³n del Laboratorio de VirologÃ­a del Hospital de NiÃ±os Dr. Ricardo Gutierrez on behalf of 'Proyecto Argentino Interinstitucional de genomica de SARS-CoV-2' (PAIS Consortium)	Nabaes Jodar et al
Argentina/PAIS-A0033/2020	EPI_ISL_792122	2020-04-24	Laboratorio de VirologÃ­a del Hospital de NiÃ±os Dr. Ricardo Gutierrez	Ãrea de SecuenciaciÃ³n del Laboratorio de VirologÃ­a del Hospital de NiÃ±os Dr. Ricardo Gutierrez on behalf of 'Proyecto Argentino Interinstitucional de genomica de SARS-CoV-2' (PAIS Consortium)	Nabaes Jodar et al
Argentina/PAIS-A0034/2020	EPI_ISL_792123	2020-04-24	Laboratorio de VirologÃ­a del Hospital de NiÃ±os Dr. Ricardo Gutierrez	Ãrea de SecuenciaciÃ³n del Laboratorio de VirologÃ­a del Hospital de NiÃ±os Dr. Ricardo Gutierrez on behalf of 'Proyecto Argentino Interinstitucional de genomica de SARS-CoV-2' (PAIS Consortium)	Nabaes Jodar et al
Argentina/PAIS-A0035/2020	EPI_ISL_792124	2020-04-24	Laboratorio de VirologÃ­a del Hospital de NiÃ±os Dr. Ricardo Gutierrez	Ãrea de SecuenciaciÃ³n del Laboratorio de VirologÃ­a del Hospital de NiÃ±os Dr. Ricardo Gutierrez on behalf of 'Proyecto Argentino Interinstitucional de genomica de SARS-CoV-2' (PAIS Consortium)	Nabaes Jodar et al
Argentina/PAIS-A0036/2020	EPI_ISL_792125	2020-04-26	Laboratorio de VirologÃ­a del Hospital de NiÃ±os Dr. Ricardo Gutierrez	Ãrea de SecuenciaciÃ³n del Laboratorio de VirologÃ­a del Hospital de NiÃ±os Dr. Ricardo Gutierrez on behalf of 'Proyecto Argentino Interinstitucional de genomica de SARS-CoV-2' (PAIS Consortium)	Nabaes Jodar et al
Argentina/PAIS-A0037/2020	EPI_ISL_792126	2020-04-26	Laboratorio de VirologÃ­a del Hospital de NiÃ±os Dr. Ricardo Gutierrez	Ãrea de SecuenciaciÃ³n del Laboratorio de VirologÃ­a del Hospital de NiÃ±os Dr. Ricardo Gutierrez on behalf of 'Proyecto Argentino Interinstitucional de genomica de SARS-CoV-2' (PAIS Consortium)	Nabaes Jodar et al
Argentina/PAIS-A0038/2020	EPI_ISL_792127	2020-04-26	Laboratorio de VirologÃ­a del Hospital de NiÃ±os Dr. Ricardo Gutierrez	Ãrea de SecuenciaciÃ³n del Laboratorio de VirologÃ­a del Hospital de NiÃ±os Dr. Ricardo Gutierrez on behalf of 'Proyecto Argentino Interinstitucional de genomica de SARS-CoV-2' (PAIS Consortium)	Nabaes Jodar et al
Argentina/PAIS-A0039/2020	EPI_ISL_792128	2020-04-26	Laboratorio de VirologÃ­a del Hospital de NiÃ±os Dr. Ricardo Gutierrez	Ãrea de SecuenciaciÃ³n del Laboratorio de VirologÃ­a del Hospital de NiÃ±os Dr. Ricardo Gutierrez on behalf of 'Proyecto Argentino Interinstitucional de genomica de SARS-CoV-2' (PAIS Consortium)	Nabaes Jodar et al
Argentina/PAIS-A0040/2020	EPI_ISL_792129	2020-04-28	Laboratorio de VirologÃ­a del Hospital de NiÃ±os Dr. Ricardo Gutierrez	Ãrea de SecuenciaciÃ³n del Laboratorio de VirologÃ­a del Hospital de NiÃ±os Dr. Ricardo Gutierrez on behalf of 'Proyecto Argentino Interinstitucional de genomica de SARS-CoV-2' (PAIS Consortium)	Nabaes Jodar et al
Argentina/PAIS-A0041/2020	EPI_ISL_792130	2020-04-28	Laboratorio de VirologÃ­a del Hospital de NiÃ±os Dr. Ricardo Gutierrez	Ãrea de SecuenciaciÃ³n del Laboratorio de VirologÃ­a del Hospital de NiÃ±os Dr. Ricardo Gutierrez on behalf of 'Proyecto Argentino Interinstitucional de genomica de SARS-CoV-2' (PAIS Consortium)	Nabaes Jodar et al
Argentina/PAIS-A0042/2020	EPI_ISL_792131	2020-04-28	Laboratorio de VirologÃ­a del Hospital de NiÃ±os Dr. Ricardo Gutierrez	Ãrea de SecuenciaciÃ³n del Laboratorio de VirologÃ­a del Hospital de NiÃ±os Dr. Ricardo Gutierrez on behalf of 'Proyecto Argentino Interinstitucional de genomica de SARS-CoV-2' (PAIS Consortium)	Nabaes Jodar et al
Argentina/PAIS-A0043/2020	EPI_ISL_792132	2020-04-28	Laboratorio de VirologÃ­a del Hospital de NiÃ±os Dr. Ricardo Gutierrez	Ãrea de SecuenciaciÃ³n del Laboratorio de VirologÃ­a del Hospital de NiÃ±os Dr. Ricardo Gutierrez on behalf of 'Proyecto Argentino Interinstitucional de genomica de SARS-CoV-2' (PAIS Consortium)	Nabaes Jodar et al
Argentina/PAIS-A0044/2020	EPI_ISL_792133	2020-04-28	Laboratorio de VirologÃ­a del Hospital de NiÃ±os Dr. Ricardo Gutierrez	Ãrea de SecuenciaciÃ³n del Laboratorio de VirologÃ­a del Hospital de NiÃ±os Dr. Ricardo Gutierrez on behalf of 'Proyecto Argentino Interinstitucional de genomica de SARS-CoV-2' (PAIS Consortium)	Nabaes Jodar et al
Argentina/PAIS-A0045/2020	EPI_ISL_792134	2020-04-29	Laboratorio de VirologÃ­a del Hospital de NiÃ±os Dr. Ricardo Gutierrez	Ãrea de SecuenciaciÃ³n del Laboratorio de VirologÃ­a del Hospital de NiÃ±os Dr. Ricardo Gutierrez on behalf of 'Proyecto Argentino Interinstitucional de genomica de SARS-CoV-2' (PAIS Consortium)	Nabaes Jodar et al
Argentina/PAIS-A0046/2020	EPI_ISL_792135	2020-04-29	Laboratorio de VirologÃ­a del Hospital de NiÃ±os Dr. Ricardo Gutierrez	Ãrea de SecuenciaciÃ³n del Laboratorio de VirologÃ­a del Hospital de NiÃ±os Dr. Ricardo Gutierrez on behalf of 'Proyecto Argentino Interinstitucional de genomica de SARS-CoV-2' (PAIS Consortium)	Nabaes Jodar et al
Argentina/PAIS-A0047/2020	EPI_ISL_792136	2020-04-29	Laboratorio de VirologÃ­a del Hospital de NiÃ±os Dr. Ricardo Gutierrez	Ãrea de SecuenciaciÃ³n del Laboratorio de VirologÃ­a del Hospital de NiÃ±os Dr. Ricardo Gutierrez on behalf of 'Proyecto Argentino Interinstitucional de genomica de SARS-CoV-2' (PAIS Consortium)	Nabaes Jodar et al
Argentina/PAIS-A0048/2020	EPI_ISL_792137	2020-04-30	Laboratorio de VirologÃ­a del Hospital de NiÃ±os Dr. Ricardo Gutierrez	Ãrea de SecuenciaciÃ³n del Laboratorio de VirologÃ­a del Hospital de NiÃ±os Dr. Ricardo Gutierrez on behalf of 'Proyecto Argentino Interinstitucional de genomica de SARS-CoV-2' (PAIS Consortium)	Nabaes Jodar et al
Argentina/PAIS-A0049/2020	EPI_ISL_792138	2020-04-30	Laboratorio de VirologÃ­a del Hospital de NiÃ±os Dr. Ricardo Gutierrez	Ãrea de SecuenciaciÃ³n del Laboratorio de VirologÃ­a del Hospital de NiÃ±os Dr. Ricardo Gutierrez on behalf of 'Proyecto Argentino Interinstitucional de genomica de SARS-CoV-2' (PAIS Consortium)	Nabaes Jodar et al
Argentina/PAIS-A0050/2020	EPI_ISL_792139	2020-04-30	Laboratorio de VirologÃ­a del Hospital de NiÃ±os Dr. Ricardo Gutierrez	Ãrea de SecuenciaciÃ³n del Laboratorio de VirologÃ­a del Hospital de NiÃ±os Dr. Ricardo Gutierrez on behalf of 'Proyecto Argentino Interinstitucional de genomica de SARS-CoV-2' (PAIS Consortium)	Nabaes Jodar et al
Argentina/PAIS-A0051/2020	EPI_ISL_792140	2020-05-01	Laboratorio de VirologÃ­a del Hospital de NiÃ±os Dr. Ricardo Gutierrez	Ãrea de SecuenciaciÃ³n del Laboratorio de VirologÃ­a del Hospital de NiÃ±os Dr. Ricardo Gutierrez on behalf of 'Proyecto Argentino Interinstitucional de genomica de SARS-CoV-2' (PAIS Consortium)	Nabaes Jodar et al
Argentina/PAIS-A0052/2020	EPI_ISL_792141	2020-05-01	Laboratorio de VirologÃ­a del Hospital de NiÃ±os Dr. Ricardo Gutierrez	Ãrea de SecuenciaciÃ³n del Laboratorio de VirologÃ­a del Hospital de NiÃ±os Dr. Ricardo Gutierrez on behalf of 'Proyecto Argentino Interinstitucional de genomica de SARS-CoV-2' (PAIS Consortium)	Nabaes Jodar et al
Argentina/PAIS-A0053/2020	EPI_ISL_792142	2020-05-01	Laboratorio de VirologÃ­a del Hospital de NiÃ±os Dr. Ricardo Gutierrez	Ãrea de SecuenciaciÃ³n del Laboratorio de VirologÃ­a del Hospital de NiÃ±os Dr. Ricardo Gutierrez on behalf of 'Proyecto Argentino Interinstitucional de genomica de SARS-CoV-2' (PAIS Consortium)	Nabaes Jodar et al
Argentina/PAIS-A0054/2020	EPI_ISL_792143	2020-05-01	Laboratorio de VirologÃ­a del Hospital de NiÃ±os Dr. Ricardo Gutierrez	Ãrea de SecuenciaciÃ³n del Laboratorio de VirologÃ­a del Hospital de NiÃ±os Dr. Ricardo Gutierrez on behalf of 'Proyecto Argentino Interinstitucional de genomica de SARS-CoV-2' (PAIS Consortium)	Nabaes Jodar et al
Argentina/PAIS-A0055/2020	EPI_ISL_792144	2020-05-01	Laboratorio de VirologÃ­a del Hospital de NiÃ±os Dr. Ricardo Gutierrez	Ãrea de SecuenciaciÃ³n del Laboratorio de VirologÃ­a del Hospital de NiÃ±os Dr. Ricardo Gutierrez on behalf of 'Proyecto Argentino Interinstitucional de genomica de SARS-CoV-2' (PAIS Consortium)	Nabaes Jodar et al
Argentina/PAIS-A0056/2020	EPI_ISL_792145	2020-05-02	Laboratorio de VirologÃ­a del Hospital de NiÃ±os Dr. Ricardo Gutierrez	Ãrea de SecuenciaciÃ³n del Laboratorio de VirologÃ­a del Hospital de NiÃ±os Dr. Ricardo Gutierrez on behalf of 'Proyecto Argentino Interinstitucional de genomica de SARS-CoV-2' (PAIS Consortium)	Nabaes Jodar et al
Argentina/PAIS-A0057/2020	EPI_ISL_792146	2020-05-02	Laboratorio de VirologÃ­a del Hospital de NiÃ±os Dr. Ricardo Gutierrez	Ãrea de SecuenciaciÃ³n del Laboratorio de VirologÃ­a del Hospital de NiÃ±os Dr. Ricardo Gutierrez on behalf of 'Proyecto Argentino Interinstitucional de genomica de SARS-CoV-2' (PAIS Consortium)	Nabaes Jodar et al
Argentina/PAIS-A0058/2020	EPI_ISL_792147	2020-05-02	Laboratorio de VirologÃ­a del Hospital de NiÃ±os Dr. Ricardo Gutierrez	Ãrea de SecuenciaciÃ³n del Laboratorio de VirologÃ­a del Hospital de NiÃ±os Dr. Ricardo Gutierrez on behalf of 'Proyecto Argentino Interinstitucional de genomica de SARS-CoV-2' (PAIS Consortium)	Nabaes Jodar et al
Argentina/PAIS-A0059/2020	EPI_ISL_792148	2020-05-02	Laboratorio de VirologÃ­a del Hospital de NiÃ±os Dr. Ricardo Gutierrez	Ãrea de SecuenciaciÃ³n del Laboratorio de VirologÃ­a del Hospital de NiÃ±os Dr. Ricardo Gutierrez on behalf of 'Proyecto Argentino Interinstitucional de genomica de SARS-CoV-2' (PAIS Consortium)	Nabaes Jodar et al
Argentina/PAIS-A0060/2020	EPI_ISL_792149	2020-05-03	Laboratorio de VirologÃ­a del Hospital de NiÃ±os Dr. Ricardo Gutierrez	Ãrea de SecuenciaciÃ³n del Laboratorio de VirologÃ­a del Hospital de NiÃ±os Dr. Ricardo Gutierrez on behalf of 'Proyecto Argentino Interinstitucional de genomica de SARS-CoV-2' (PAIS Consortium)	Nabaes Jodar et al
Argentina/PAIS-A0061/2020	EPI_ISL_792150	2020-05-03	Laboratorio de VirologÃ­a del Hospital de NiÃ±os Dr. Ricardo Gutierrez	Ãrea de SecuenciaciÃ³n del Laboratorio de VirologÃ­a del Hospital de NiÃ±os Dr. Ricardo Gutierrez on behalf of 'Proyecto Argentino Interinstitucional de genomica de SARS-CoV-2' (PAIS Consortium)	Nabaes Jodar et al
Argentina/PAIS-A0062/2020	EPI_ISL_792151	2020-05-03	Laboratorio de VirologÃ­a del Hospital de NiÃ±os Dr. Ricardo Gutierrez	Ãrea de SecuenciaciÃ³n del Laboratorio de VirologÃ­a del Hospital de NiÃ±os Dr. Ricardo Gutierrez on behalf of 'Proyecto Argentino Interinstitucional de genomica de SARS-CoV-2' (PAIS Consortium)	Nabaes Jodar et al
Argentina/PAIS-A0063/2020	EPI_ISL_792152	2020-05-03	Laboratorio de VirologÃ­a del Hospital de NiÃ±os Dr. Ricardo Gutierrez	Ãrea de SecuenciaciÃ³n del Laboratorio de VirologÃ­a del Hospital de NiÃ±os Dr. Ricardo Gutierrez on behalf of 'Proyecto Argentino Interinstitucional de genomica de SARS-CoV-2' (PAIS Consortium)	Nabaes Jodar et al
Argentina/PAIS-A0064/2020	EPI_ISL_792153	2020-05-03	Laboratorio de VirologÃ­a del Hospital de NiÃ±os Dr. Ricardo Gutierrez	Ãrea de SecuenciaciÃ³n del Laboratorio de VirologÃ­a del Hospital de NiÃ±os Dr. Ricardo Gutierrez on behalf of 'Proyecto Argentino Interinstitucional de genomica de SARS-CoV-2' (PAIS Consortium)	Nabaes Jodar et al
Argentina/PAIS-A0065/2020	EPI_ISL_792154	2020-05-03	Laboratorio de VirologÃ­a del Hospital de NiÃ±os Dr. Ricardo Gutierrez	Ãrea de SecuenciaciÃ³n del Laboratorio de VirologÃ­a del Hospital de NiÃ±os Dr. Ricardo Gutierrez on behalf of 'Proyecto Argentino Interinstitucional de genomica de SARS-CoV-2' (PAIS Consortium)	Nabaes Jodar et al
Argentina/PAIS-A0066/2020	EPI_ISL_792155	2020-05-03	Laboratorio de VirologÃ­a del Hospital de NiÃ±os Dr. Ricardo Gutierrez	Ãrea de SecuenciaciÃ³n del Laboratorio de VirologÃ­a del Hospital de NiÃ±os Dr. Ricardo Gutierrez on behalf of 'Proyecto Argentino Interinstitucional de genomica de SARS-CoV-2' (PAIS Consortium)	Nabaes Jodar et al
Argentina/PAIS-A0067/2020	EPI_ISL_792156	2020-05-03	Laboratorio de VirologÃ­a del Hospital de NiÃ±os Dr. Ricardo Gutierrez	Ãrea de SecuenciaciÃ³n del Laboratorio de VirologÃ­a del Hospital de NiÃ±os Dr. Ricardo Gutierrez on behalf of 'Proyecto Argentino Interinstitucional de genomica de SARS-CoV-2' (PAIS Consortium)	Nabaes Jodar et al
Argentina/PAIS-A0068/2020	EPI_ISL_792157	2020-05-03	Laboratorio de VirologÃ­a del Hospital de NiÃ±os Dr. Ricardo Gutierrez	Ãrea de SecuenciaciÃ³n del Laboratorio de VirologÃ­a del Hospital de NiÃ±os Dr. Ricardo Gutierrez on behalf of 'Proyecto Argentino Interinstitucional de genomica de SARS-CoV-2' (PAIS Consortium)	Nabaes Jodar et al
Argentina/PAIS-A0069/2020	EPI_ISL_792158	2020-05-03	Laboratorio de VirologÃ­a del Hospital de NiÃ±os Dr. Ricardo Gutierrez	Ãrea de SecuenciaciÃ³n del Laboratorio de VirologÃ­a del Hospital de NiÃ±os Dr. Ricardo Gutierrez on behalf of 'Proyecto Argentino Interinstitucional de genomica de SARS-CoV-2' (PAIS Consortium)	Nabaes Jodar et al
Argentina/PAIS-A0070/2020	EPI_ISL_792159	2020-05-03	Laboratorio de VirologÃ­a del Hospital de NiÃ±os Dr. Ricardo Gutierrez	Ãrea de SecuenciaciÃ³n del Laboratorio de VirologÃ­a del Hospital de NiÃ±os Dr. Ricardo Gutierrez on behalf of 'Proyecto Argentino Interinstitucional de genomica de SARS-CoV-2' (PAIS Consortium)	Nabaes Jodar et al
Argentina/PAIS-A0071/2020	EPI_ISL_792160	2020-05-03	Laboratorio de VirologÃ­a del Hospital de NiÃ±os Dr. Ricardo Gutierrez	Ãrea de SecuenciaciÃ³n del Laboratorio de VirologÃ­a del Hospital de NiÃ±os Dr. Ricardo Gutierrez on behalf of 'Proyecto Argentino Interinstitucional de genomica de SARS-CoV-2' (PAIS Consortium)	Nabaes Jodar et al
Argentina/PAIS-A0072/2020	EPI_ISL_792161	2020-05-03	Laboratorio de VirologÃ­a del Hospital de NiÃ±os Dr. Ricardo Gutierrez	Ãrea de SecuenciaciÃ³n del Laboratorio de VirologÃ­a del Hospital de NiÃ±os Dr. Ricardo Gutierrez on behalf of 'Proyecto Argentino Interinstitucional de genomica de SARS-CoV-2' (PAIS Consortium)	Nabaes Jodar et al
Argentina/PAIS-A0073/2020	EPI_ISL_792162	2020-05-04	Laboratorio de VirologÃ­a del Hospital de NiÃ±os Dr. Ricardo Gutierrez	Ãrea de SecuenciaciÃ³n del Laboratorio de VirologÃ­a del Hospital de NiÃ±os Dr. Ricardo Gutierrez on behalf of 'Proyecto Argentino Interinstitucional de genomica de SARS-CoV-2' (PAIS Consortium)	Nabaes Jodar et al
Argentina/PAIS-A0074/2020	EPI_ISL_792163	2020-05-04	Laboratorio de VirologÃ­a del Hospital de NiÃ±os Dr. Ricardo Gutierrez	Ãrea de SecuenciaciÃ³n del Laboratorio de VirologÃ­a del Hospital de NiÃ±os Dr. Ricardo Gutierrez on behalf of 'Proyecto Argentino Interinstitucional de genomica de SARS-CoV-2' (PAIS Consortium)	Nabaes Jodar et al
Argentina/PAIS-A0075/2020	EPI_ISL_792164	2020-05-04	Laboratorio de VirologÃ­a del Hospital de NiÃ±os Dr. Ricardo Gutierrez	Ãrea de SecuenciaciÃ³n del Laboratorio de VirologÃ­a del Hospital de NiÃ±os Dr. Ricardo Gutierrez on behalf of 'Proyecto Argentino Interinstitucional de genomica de SARS-CoV-2' (PAIS Consortium)	Nabaes Jodar et al
Argentina/PAIS-A0076/2020	EPI_ISL_792165	2020-05-04	Laboratorio de VirologÃ­a del Hospital de NiÃ±os Dr. Ricardo Gutierrez	Ãrea de SecuenciaciÃ³n del Laboratorio de VirologÃ­a del Hospital de NiÃ±os Dr. Ricardo Gutierrez on behalf of 'Proyecto Argentino Interinstitucional de genomica de SARS-CoV-2' (PAIS Consortium)	Nabaes Jodar et al
Argentina/PAIS-A0077/2020	EPI_ISL_792166	2020-05-04	Laboratorio de VirologÃ­a del Hospital de NiÃ±os Dr. Ricardo Gutierrez	Ãrea de SecuenciaciÃ³n del Laboratorio de VirologÃ­a del Hospital de NiÃ±os Dr. Ricardo Gutierrez on behalf of 'Proyecto Argentino Interinstitucional de genomica de SARS-CoV-2' (PAIS Consortium)	Nabaes Jodar et al
Argentina/PAIS-A0078/2020	EPI_ISL_792167	2020-05-04	Laboratorio de VirologÃ­a del Hospital de NiÃ±os Dr. Ricardo Gutierrez	Ãrea de SecuenciaciÃ³n del Laboratorio de VirologÃ­a del Hospital de NiÃ±os Dr. Ricardo Gutierrez on behalf of 'Proyecto Argentino Interinstitucional de genomica de SARS-CoV-2' (PAIS Consortium)	Nabaes Jodar et al
Argentina/PAIS-A0079/2020	EPI_ISL_792168	2020-05-04	Laboratorio de VirologÃ­a del Hospital de NiÃ±os Dr. Ricardo Gutierrez	Ãrea de SecuenciaciÃ³n del Laboratorio de VirologÃ­a del Hospital de NiÃ±os Dr. Ricardo Gutierrez on behalf of 'Proyecto Argentino Interinstitucional de genomica de SARS-CoV-2' (PAIS Consortium)	Nabaes Jodar et al
Argentina/PAIS-A0080/2020	EPI_ISL_792169	2020-05-04	Laboratorio de VirologÃ­a del Hospital de NiÃ±os Dr. Ricardo Gutierrez	Ãrea de SecuenciaciÃ³n del Laboratorio de VirologÃ­a del Hospital de NiÃ±os Dr. Ricardo Gutierrez on behalf of 'Proyecto Argentino Interinstitucional de genomica de SARS-CoV-2' (PAIS Consortium)	Nabaes Jodar et al
Argentina/PAIS-A0081/2020	EPI_ISL_792170	2020-05-04	Laboratorio de VirologÃ­a del Hospital de NiÃ±os Dr. Ricardo Gutierrez	Ãrea de SecuenciaciÃ³n del Laboratorio de VirologÃ­a del Hospital de NiÃ±os Dr. Ricardo Gutierrez on behalf of 'Proyecto Argentino Interinstitucional de genomica de SARS-CoV-2' (PAIS Consortium)	Nabaes Jodar et al
Argentina/PAIS-A0082/2020	EPI_ISL_792171	2020-05-04	Laboratorio de VirologÃ­a del Hospital de NiÃ±os Dr. Ricardo Gutierrez	Ãrea de SecuenciaciÃ³n del Laboratorio de VirologÃ­a del Hospital de NiÃ±os Dr. Ricardo Gutierrez on behalf of 'Proyecto Argentino Interinstitucional de genomica de SARS-CoV-2' (PAIS Consortium)	Nabaes Jodar et al
Argentina/PAIS-A0083/2020	EPI_ISL_792172	2020-05-04	Laboratorio de VirologÃ­a del Hospital de NiÃ±os Dr. Ricardo Gutierrez	Ãrea de SecuenciaciÃ³n del Laboratorio de VirologÃ­a del Hospital de NiÃ±os Dr. Ricardo Gutierrez on behalf of 'Proyecto Argentino Interinstitucional de genomica de SARS-CoV-2' (PAIS Consortium)	Nabaes Jodar et al
Argentina/PAIS-A0084/2020	EPI_ISL_792173	2020-05-04	Laboratorio de VirologÃ­a del Hospital de NiÃ±os Dr. Ricardo Gutierrez	Ãrea de SecuenciaciÃ³n del Laboratorio de VirologÃ­a del Hospital de NiÃ±os Dr. Ricardo Gutierrez on behalf of 'Proyecto Argentino Interinstitucional de genomica de SARS-CoV-2' (PAIS Consortium)	Nabaes Jodar et al
Argentina/PAIS-A0085/2020	EPI_ISL_792174	2020-05-04	Laboratorio de VirologÃ­a del Hospital de NiÃ±os Dr. Ricardo Gutierrez	Ãrea de SecuenciaciÃ³n del Laboratorio de VirologÃ­a del Hospital de NiÃ±os Dr. Ricardo Gutierrez on behalf of 'Proyecto Argentino Interinstitucional de genomica de SARS-CoV-2' (PAIS Consortium)	Nabaes Jodar et al
Argentina/PAIS-A0086/2020	EPI_ISL_792175	2020-05-05	Laboratorio de VirologÃ­a del Hospital de NiÃ±os Dr. Ricardo Gutierrez	Ãrea de SecuenciaciÃ³n del Laboratorio de VirologÃ­a del Hospital de NiÃ±os Dr. Ricardo Gutierrez on behalf of 'Proyecto Argentino Interinstitucional de genomica de SARS-CoV-2' (PAIS Consortium)	Nabaes Jodar et al
Argentina/PAIS-A0087/2020	EPI_ISL_792176	2020-05-05	Laboratorio de VirologÃ­a del Hospital de NiÃ±os Dr. Ricardo Gutierrez	Ãrea de SecuenciaciÃ³n del Laboratorio de VirologÃ­a del Hospital de NiÃ±os Dr. Ricardo Gutierrez on behalf of 'Proyecto Argentino Interinstitucional de genomica de SARS-CoV-2' (PAIS Consortium)	Nabaes Jodar et al
Argentina/PAIS-A0088/2020	EPI_ISL_792177	2020-05-05	Laboratorio de VirologÃ­a del Hospital de NiÃ±os Dr. Ricardo Gutierrez	Ãrea de SecuenciaciÃ³n del Laboratorio de VirologÃ­a del Hospital de NiÃ±os Dr. Ricardo Gutierrez on behalf of 'Proyecto Argentino Interinstitucional de genomica de SARS-CoV-2' (PAIS Consortium)	Nabaes Jodar et al
Argentina/PAIS-A0089/2020	EPI_ISL_792178	2020-05-06	Laboratorio de VirologÃ­a del Hospital de NiÃ±os Dr. Ricardo Gutierrez	Ãrea de SecuenciaciÃ³n del Laboratorio de VirologÃ­a del Hospital de NiÃ±os Dr. Ricardo Gutierrez on behalf of 'Proyecto Argentino Interinstitucional de genomica de SARS-CoV-2' (PAIS Consortium)	Nabaes Jodar et al
Argentina/PAIS-A0090/2020	EPI_ISL_792179	2020-05-07	Laboratorio de VirologÃ­a del Hospital de NiÃ±os Dr. Ricardo Gutierrez	Ãrea de SecuenciaciÃ³n del Laboratorio de VirologÃ­a del Hospital de NiÃ±os Dr. Ricardo Gutierrez on behalf of 'Proyecto Argentino Interinstitucional de genomica de SARS-CoV-2' (PAIS Consortium)	Nabaes Jodar et al
Argentina/PAIS-A0091/2020	EPI_ISL_792180	2020-05-07	Laboratorio de VirologÃ­a del Hospital de NiÃ±os Dr. Ricardo Gutierrez	Ãrea de SecuenciaciÃ³n del Laboratorio de VirologÃ­a del Hospital de NiÃ±os Dr. Ricardo Gutierrez on behalf of 'Proyecto Argentino Interinstitucional de genomica de SARS-CoV-2' (PAIS Consortium)	Nabaes Jodar et al
Argentina/PAIS-A0092/2020	EPI_ISL_792181	2020-05-07	Laboratorio de VirologÃ­a del Hospital de NiÃ±os Dr. Ricardo Gutierrez	Ãrea de SecuenciaciÃ³n del Laboratorio de VirologÃ­a del Hospital de NiÃ±os Dr. Ricardo Gutierrez on behalf of 'Proyecto Argentino Interinstitucional de genomica de SARS-CoV-2' (PAIS Consortium)	Nabaes Jodar et al
Argentina/PAIS-A0093/2020	EPI_ISL_792182	2020-05-07	Laboratorio de VirologÃ­a del Hospital de NiÃ±os Dr. Ricardo Gutierrez	Ãrea de SecuenciaciÃ³n del Laboratorio de VirologÃ­a del Hospital de NiÃ±os Dr. Ricardo Gutierrez on behalf of 'Proyecto Argentino Interinstitucional de genomica de SARS-CoV-2' (PAIS Consortium)	Nabaes Jodar et al
Argentina/PAIS-A0094/2020	EPI_ISL_792183	2020-05-08	Laboratorio de VirologÃ­a del Hospital de NiÃ±os Dr. Ricardo Gutierrez	Ãrea de SecuenciaciÃ³n del Laboratorio de VirologÃ­a del Hospital de NiÃ±os Dr. Ricardo Gutierrez on behalf of 'Proyecto Argentino Interinstitucional de genomica de SARS-CoV-2' (PAIS Consortium)	Nabaes Jodar et al
Argentina/PAIS-A0095/2020	EPI_ISL_792184	2020-05-08	Laboratorio de VirologÃ­a del Hospital de NiÃ±os Dr. Ricardo Gutierrez	Ãrea de SecuenciaciÃ³n del Laboratorio de VirologÃ­a del Hospital de NiÃ±os Dr. Ricardo Gutierrez on behalf of 'Proyecto Argentino Interinstitucional de genomica de SARS-CoV-2' (PAIS Consortium)	Nabaes Jodar et al
Argentina/PAIS-A0096/2020	EPI_ISL_792185	2020-05-08	Laboratorio de VirologÃ­a del Hospital de NiÃ±os Dr. Ricardo Gutierrez	Ãrea de SecuenciaciÃ³n del Laboratorio de VirologÃ­a del Hospital de NiÃ±os Dr. Ricardo Gutierrez on behalf of 'Proyecto Argentino Interinstitucional de genomica de SARS-CoV-2' (PAIS Consortium)	Nabaes Jodar et al
Argentina/PAIS-A0097/2020	EPI_ISL_792186	2020-05-09	Laboratorio de VirologÃ­a del Hospital de NiÃ±os Dr. Ricardo Gutierrez	Ãrea de SecuenciaciÃ³n del Laboratorio de VirologÃ­a del Hospital de NiÃ±os Dr. Ricardo Gutierrez on behalf of 'Proyecto Argentino Interinstitucional de genomica de SARS-CoV-2' (PAIS Consortium)	Nabaes Jodar et al
Argentina/PAIS-A0098/2020	EPI_ISL_792187	2020-05-09	Laboratorio de VirologÃ­a del Hospital de NiÃ±os Dr. Ricardo Gutierrez	Ãrea de SecuenciaciÃ³n del Laboratorio de VirologÃ­a del Hospital de NiÃ±os Dr. Ricardo Gutierrez on behalf of 'Proyecto Argentino Interinstitucional de genomica de SARS-CoV-2' (PAIS Consortium)	Nabaes Jodar et al
Argentina/PAIS-A0099/2020	EPI_ISL_792188	2020-05-09	Laboratorio de VirologÃ­a del Hospital de NiÃ±os Dr. Ricardo Gutierrez	Ãrea de SecuenciaciÃ³n del Laboratorio de VirologÃ­a del Hospital de NiÃ±os Dr. Ricardo Gutierrez on behalf of 'Proyecto Argentino Interinstitucional de genomica de SARS-CoV-2' (PAIS Consortium)	Nabaes Jodar et al
Argentina/PAIS-A0100/2020	EPI_ISL_792189	2020-05-09	Laboratorio de VirologÃ­a del Hospital de NiÃ±os Dr. Ricardo Gutierrez	Ãrea de SecuenciaciÃ³n del Laboratorio de VirologÃ­a del Hospital de NiÃ±os Dr. Ricardo Gutierrez on behalf of 'Proyecto Argentino Interinstitucional de genomica de SARS-CoV-2' (PAIS Consortium)	Nabaes Jodar et al
Argentina/PAIS-A0101/2020	EPI_ISL_792190	2020-05-09	Laboratorio de VirologÃ­a del Hospital de NiÃ±os Dr. Ricardo Gutierrez	Ãrea de SecuenciaciÃ³n del Laboratorio de VirologÃ­a del Hospital de NiÃ±os Dr. Ricardo Gutierrez on behalf of 'Proyecto Argentino Interinstitucional de genomica de SARS-CoV-2' (PAIS Consortium)	Nabaes Jodar et al
Argentina/PAIS-A0102/2020	EPI_ISL_792191	2020-05-09	Laboratorio de VirologÃ­a del Hospital de NiÃ±os Dr. Ricardo Gutierrez	Ãrea de SecuenciaciÃ³n del Laboratorio de VirologÃ­a del Hospital de NiÃ±os Dr. Ricardo Gutierrez on behalf of 'Proyecto Argentino Interinstitucional de genomica de SARS-CoV-2' (PAIS Consortium)	Nabaes Jodar et al
Argentina/PAIS-A0103/2020	EPI_ISL_792192	2020-05-09	Laboratorio de VirologÃ­a del Hospital de NiÃ±os Dr. Ricardo Gutierrez	Ãrea de SecuenciaciÃ³n del Laboratorio de VirologÃ­a del Hospital de NiÃ±os Dr. Ricardo Gutierrez on behalf of 'Proyecto Argentino Interinstitucional de genomica de SARS-CoV-2' (PAIS Consortium)	Nabaes Jodar et al
Argentina/PAIS-A0104/2020	EPI_ISL_792193	2020-05-09	Laboratorio de VirologÃ­a del Hospital de NiÃ±os Dr. Ricardo Gutierrez	Ãrea de SecuenciaciÃ³n del Laboratorio de VirologÃ­a del Hospital de NiÃ±os Dr. Ricardo Gutierrez on behalf of 'Proyecto Argentino Interinstitucional de genomica de SARS-CoV-2' (PAIS Consortium)	Nabaes Jodar et al
Argentina/PAIS-A0105/2020	EPI_ISL_792194	2020-05-09	Laboratorio de VirologÃ­a del Hospital de NiÃ±os Dr. Ricardo Gutierrez	Ãrea de SecuenciaciÃ³n del Laboratorio de VirologÃ­a del Hospital de NiÃ±os Dr. Ricardo Gutierrez on behalf of 'Proyecto Argentino Interinstitucional de genomica de SARS-CoV-2' (PAIS Consortium)	Nabaes Jodar et al
Argentina/PAIS-A0106/2020	EPI_ISL_792195	2020-05-09	Laboratorio de VirologÃ­a del Hospital de NiÃ±os Dr. Ricardo Gutierrez	Ãrea de SecuenciaciÃ³n del Laboratorio de VirologÃ­a del Hospital de NiÃ±os Dr. Ricardo Gutierrez on behalf of 'Proyecto Argentino Interinstitucional de genomica de SARS-CoV-2' (PAIS Consortium)	Nabaes Jodar et al
Argentina/PAIS-A0107/2020	EPI_ISL_792196	2020-05-10	Laboratorio de VirologÃ­a del Hospital de NiÃ±os Dr. Ricardo Gutierrez	Ãrea de SecuenciaciÃ³n del Laboratorio de VirologÃ­a del Hospital de NiÃ±os Dr. Ricardo Gutierrez on behalf of 'Proyecto Argentino Interinstitucional de genomica de SARS-CoV-2' (PAIS Consortium)	Nabaes Jodar et al
Argentina/PAIS-A0108/2020	EPI_ISL_792197	2020-05-10	Laboratorio de VirologÃ­a del Hospital de NiÃ±os Dr. Ricardo Gutierrez	Ãrea de SecuenciaciÃ³n del Laboratorio de VirologÃ­a del Hospital de NiÃ±os Dr. Ricardo Gutierrez on behalf of 'Proyecto Argentino Interinstitucional de genomica de SARS-CoV-2' (PAIS Consortium)	Nabaes Jodar et al
Argentina/PAIS-A0109/2020	EPI_ISL_792198	2020-05-10	Laboratorio de VirologÃ­a del Hospital de NiÃ±os Dr. Ricardo Gutierrez	Ãrea de SecuenciaciÃ³n del Laboratorio de VirologÃ­a del Hospital de NiÃ±os Dr. Ricardo Gutierrez on behalf of 'Proyecto Argentino Interinstitucional de genomica de SARS-CoV-2' (PAIS Consortium)	Nabaes Jodar et al
Argentina/PAIS-A0110/2020	EPI_ISL_792199	2020-05-10	Laboratorio de VirologÃ­a del Hospital de NiÃ±os Dr. Ricardo Gutierrez	Ãrea de SecuenciaciÃ³n del Laboratorio de VirologÃ­a del Hospital de NiÃ±os Dr. Ricardo Gutierrez on behalf of 'Proyecto Argentino Interinstitucional de genomica de SARS-CoV-2' (PAIS Consortium)	Nabaes Jodar et al
Argentina/PAIS-A0111/2020	EPI_ISL_792200	2020-05-10	Laboratorio de VirologÃ­a del Hospital de NiÃ±os Dr. Ricardo Gutierrez	Ãrea de SecuenciaciÃ³n del Laboratorio de VirologÃ­a del Hospital de NiÃ±os Dr. Ricardo Gutierrez on behalf of 'Proyecto Argentino Interinstitucional de genomica de SARS-CoV-2' (PAIS Consortium)	Nabaes Jodar et al
Argentina/PAIS-A0112/2020	EPI_ISL_792201	2020-05-10	Laboratorio de VirologÃ­a del Hospital de NiÃ±os Dr. Ricardo Gutierrez	Ãrea de SecuenciaciÃ³n del Laboratorio de VirologÃ­a del Hospital de NiÃ±os Dr. Ricardo Gutierrez on behalf of 'Proyecto Argentino Interinstitucional de genomica de SARS-CoV-2' (PAIS Consortium)	Nabaes Jodar et al
Argentina/PAIS-A0113/2020	EPI_ISL_792202	2020-05-10	Laboratorio de VirologÃ­a del Hospital de NiÃ±os Dr. Ricardo Gutierrez	Ãrea de SecuenciaciÃ³n del Laboratorio de VirologÃ­a del Hospital de NiÃ±os Dr. Ricardo Gutierrez on behalf of 'Proyecto Argentino Interinstitucional de genomica de SARS-CoV-2' (PAIS Consortium)	Nabaes Jodar et al
Argentina/PAIS-A0114/2020	EPI_ISL_792203	2020-05-11	Laboratorio de VirologÃ­a del Hospital de NiÃ±os Dr. Ricardo Gutierrez	Ãrea de SecuenciaciÃ³n del Laboratorio de VirologÃ­a del Hospital de NiÃ±os Dr. Ricardo Gutierrez on behalf of 'Proyecto Argentino Interinstitucional de genomica de SARS-CoV-2' (PAIS Consortium)	Nabaes Jodar et al
Argentina/PAIS-A0115/2020	EPI_ISL_792204	2020-05-11	Laboratorio de VirologÃ­a del Hospital de NiÃ±os Dr. Ricardo Gutierrez	Ãrea de SecuenciaciÃ³n del Laboratorio de VirologÃ­a del Hospital de NiÃ±os Dr. Ricardo Gutierrez on behalf of 'Proyecto Argentino Interinstitucional de genomica de SARS-CoV-2' (PAIS Consortium)	Nabaes Jodar et al
Argentina/PAIS-A0116/2020	EPI_ISL_792205	2020-05-11	Laboratorio de VirologÃ­a del Hospital de NiÃ±os Dr. Ricardo Gutierrez	Ãrea de SecuenciaciÃ³n del Laboratorio de VirologÃ­a del Hospital de NiÃ±os Dr. Ricardo Gutierrez on behalf of 'Proyecto Argentino Interinstitucional de genomica de SARS-CoV-2' (PAIS Consortium)	Nabaes Jodar et al
Argentina/PAIS-A0117/2020	EPI_ISL_792206	2020-05-11	Laboratorio de VirologÃ­a del Hospital de NiÃ±os Dr. Ricardo Gutierrez	Ãrea de SecuenciaciÃ³n del Laboratorio de VirologÃ­a del Hospital de NiÃ±os Dr. Ricardo Gutierrez on behalf of 'Proyecto Argentino Interinstitucional de genomica de SARS-CoV-2' (PAIS Consortium)	Nabaes Jodar et al
Argentina/PAIS-A0118/2020	EPI_ISL_792207	2020-05-11	Laboratorio de VirologÃ­a del Hospital de NiÃ±os Dr. Ricardo Gutierrez	Ãrea de SecuenciaciÃ³n del Laboratorio de VirologÃ­a del Hospital de NiÃ±os Dr. Ricardo Gutierrez on behalf of 'Proyecto Argentino Interinstitucional de genomica de SARS-CoV-2' (PAIS Consortium)	Nabaes Jodar et al
Argentina/PAIS-A0119/2020	EPI_ISL_792208	2020-05-12	Laboratorio de VirologÃ­a del Hospital de NiÃ±os Dr. Ricardo Gutierrez	Ãrea de SecuenciaciÃ³n del Laboratorio de VirologÃ­a del Hospital de NiÃ±os Dr. Ricardo Gutierrez on behalf of 'Proyecto Argentino Interinstitucional de genomica de SARS-CoV-2' (PAIS Consortium)	Nabaes Jodar et al
Argentina/PAIS-A0120/2020	EPI_ISL_792209	2020-05-12	Laboratorio de VirologÃ­a del Hospital de NiÃ±os Dr. Ricardo Gutierrez	Ãrea de SecuenciaciÃ³n del Laboratorio de VirologÃ­a del Hospital de NiÃ±os Dr. Ricardo Gutierrez on behalf of 'Proyecto Argentino Interinstitucional de genomica de SARS-CoV-2' (PAIS Consortium)	Nabaes Jodar et al
Argentina/PAIS-A0121/2020	EPI_ISL_792210	2020-05-12	Laboratorio de VirologÃ­a del Hospital de NiÃ±os Dr. Ricardo Gutierrez	Ãrea de SecuenciaciÃ³n del Laboratorio de VirologÃ­a del Hospital de NiÃ±os Dr. Ricardo Gutierrez on behalf of 'Proyecto Argentino Interinstitucional de genomica de SARS-CoV-2' (PAIS Consortium)	Nabaes Jodar et al
Argentina/PAIS-A0122/2020	EPI_ISL_792211	2020-05-12	Laboratorio de VirologÃ­a del Hospital de NiÃ±os Dr. Ricardo Gutierrez	Ãrea de SecuenciaciÃ³n del Laboratorio de VirologÃ­a del Hospital de NiÃ±os Dr. Ricardo Gutierrez on behalf of 'Proyecto Argentino Interinstitucional de genomica de SARS-CoV-2' (PAIS Consortium)	Nabaes Jodar et al
Argentina/PAIS-A0123/2020	EPI_ISL_792212	2020-05-12	Laboratorio de VirologÃ­a del Hospital de NiÃ±os Dr. Ricardo Gutierrez	Ãrea de SecuenciaciÃ³n del Laboratorio de VirologÃ­a del Hospital de NiÃ±os Dr. Ricardo Gutierrez on behalf of 'Proyecto Argentino Interinstitucional de genomica de SARS-CoV-2' (PAIS Consortium)	Nabaes Jodar et al
Argentina/PAIS-A0124/2020	EPI_ISL_792213	2020-05-12	Laboratorio de VirologÃ­a del Hospital de NiÃ±os Dr. Ricardo Gutierrez	Ãrea de SecuenciaciÃ³n del Laboratorio de VirologÃ­a del Hospital de NiÃ±os Dr. Ricardo Gutierrez on behalf of 'Proyecto Argentino Interinstitucional de genomica de SARS-CoV-2' (PAIS Consortium)	Nabaes Jodar et al
Argentina/PAIS-A0125/2020	EPI_ISL_792214	2020-05-12	Laboratorio de VirologÃ­a del Hospital de NiÃ±os Dr. Ricardo Gutierrez	Ãrea de SecuenciaciÃ³n del Laboratorio de VirologÃ­a del Hospital de NiÃ±os Dr. Ricardo Gutierrez on behalf of 'Proyecto Argentino Interinstitucional de genomica de SARS-CoV-2' (PAIS Consortium)	Nabaes Jodar et al
Argentina/PAIS-A0126/2020	EPI_ISL_792215	2020-05-13	Laboratorio de VirologÃ­a del Hospital de NiÃ±os Dr. Ricardo Gutierrez	Ãrea de SecuenciaciÃ³n del Laboratorio de VirologÃ­a del Hospital de NiÃ±os Dr. Ricardo Gutierrez on behalf of 'Proyecto Argentino Interinstitucional de genomica de SARS-CoV-2' (PAIS Consortium)	Nabaes Jodar et al
Argentina/PAIS-A0127/2020	EPI_ISL_792216	2020-05-13	Laboratorio de VirologÃ­a del Hospital de NiÃ±os Dr. Ricardo Gutierrez	Ãrea de SecuenciaciÃ³n del Laboratorio de VirologÃ­a del Hospital de NiÃ±os Dr. Ricardo Gutierrez on behalf of 'Proyecto Argentino Interinstitucional de genomica de SARS-CoV-2' (PAIS Consortium)	Nabaes Jodar et al
Argentina/PAIS-A0128/2020	EPI_ISL_792217	2020-05-13	Laboratorio de VirologÃ­a del Hospital de NiÃ±os Dr. Ricardo Gutierrez	Ãrea de SecuenciaciÃ³n del Laboratorio de VirologÃ­a del Hospital de NiÃ±os Dr. Ricardo Gutierrez on behalf of 'Proyecto Argentino Interinstitucional de genomica de SARS-CoV-2' (PAIS Consortium)	Nabaes Jodar et al
Argentina/PAIS-A0129/2020	EPI_ISL_792218	2020-05-13	Laboratorio de VirologÃ­a del Hospital de NiÃ±os Dr. Ricardo Gutierrez	Ãrea de SecuenciaciÃ³n del Laboratorio de VirologÃ­a del Hospital de NiÃ±os Dr. Ricardo Gutierrez on behalf of 'Proyecto Argentino Interinstitucional de genomica de SARS-CoV-2' (PAIS Consortium)	Nabaes Jodar et al
Argentina/PAIS-A0130/2020	EPI_ISL_792219	2020-05-13	Laboratorio de VirologÃ­a del Hospital de NiÃ±os Dr. Ricardo Gutierrez	Ãrea de SecuenciaciÃ³n del Laboratorio de VirologÃ­a del Hospital de NiÃ±os Dr. Ricardo Gutierrez on behalf of 'Proyecto Argentino Interinstitucional de genomica de SARS-CoV-2' (PAIS Consortium)	Nabaes Jodar et al
Argentina/PAIS-A0131/2020	EPI_ISL_792220	2020-05-13	Laboratorio de VirologÃ­a del Hospital de NiÃ±os Dr. Ricardo Gutierrez	Ãrea de SecuenciaciÃ³n del Laboratorio de VirologÃ­a del Hospital de NiÃ±os Dr. Ricardo Gutierrez on behalf of 'Proyecto Argentino Interinstitucional de genomica de SARS-CoV-2' (PAIS Consortium)	Nabaes Jodar et al
Argentina/PAIS-A0132/2020	EPI_ISL_792221	2020-05-13	Laboratorio de VirologÃ­a del Hospital de NiÃ±os Dr. Ricardo Gutierrez	Ãrea de SecuenciaciÃ³n del Laboratorio de VirologÃ­a del Hospital de NiÃ±os Dr. Ricardo Gutierrez on behalf of 'Proyecto Argentino Interinstitucional de genomica de SARS-CoV-2' (PAIS Consortium)	Nabaes Jodar et al
Argentina/PAIS-A0133/2020	EPI_ISL_792222	2020-05-13	Laboratorio de VirologÃ­a del Hospital de NiÃ±os Dr. Ricardo Gutierrez	Ãrea de SecuenciaciÃ³n del Laboratorio de VirologÃ­a del Hospital de NiÃ±os Dr. Ricardo Gutierrez on behalf of 'Proyecto Argentino Interinstitucional de genomica de SARS-CoV-2' (PAIS Consortium)	Nabaes Jodar et al
Argentina/PAIS-A0134/2020	EPI_ISL_792223	2020-05-13	Laboratorio de VirologÃ­a del Hospital de NiÃ±os Dr. Ricardo Gutierrez	Ãrea de SecuenciaciÃ³n del Laboratorio de VirologÃ­a del Hospital de NiÃ±os Dr. Ricardo Gutierrez on behalf of 'Proyecto Argentino Interinstitucional de genomica de SARS-CoV-2' (PAIS Consortium)	Nabaes Jodar et al
Argentina/PAIS-A0135/2020	EPI_ISL_792224	2020-05-14	Laboratorio de VirologÃ­a del Hospital de NiÃ±os Dr. Ricardo Gutierrez	Ãrea de SecuenciaciÃ³n del Laboratorio de VirologÃ­a del Hospital de NiÃ±os Dr. Ricardo Gutierrez on behalf of 'Proyecto Argentino Interinstitucional de genomica de SARS-CoV-2' (PAIS Consortium)	Nabaes Jodar et al
Argentina/PAIS-A0136/2020	EPI_ISL_792225	2020-05-14	Laboratorio de VirologÃ­a del Hospital de NiÃ±os Dr. Ricardo Gutierrez	Ãrea de SecuenciaciÃ³n del Laboratorio de VirologÃ­a del Hospital de NiÃ±os Dr. Ricardo Gutierrez on behalf of 'Proyecto Argentino Interinstitucional de genomica de SARS-CoV-2' (PAIS Consortium)	Nabaes Jodar et al
Argentina/PAIS-A0137/2020	EPI_ISL_792226	2020-05-14	Laboratorio de VirologÃ­a del Hospital de NiÃ±os Dr. Ricardo Gutierrez	Ãrea de SecuenciaciÃ³n del Laboratorio de VirologÃ­a del Hospital de NiÃ±os Dr. Ricardo Gutierrez on behalf of 'Proyecto Argentino Interinstitucional de genomica de SARS-CoV-2' (PAIS Consortium)	Nabaes Jodar et al
Argentina/PAIS-A0138/2020	EPI_ISL_792227	2020-05-15	Laboratorio de VirologÃ­a del Hospital de NiÃ±os Dr. Ricardo Gutierrez	Ãrea de SecuenciaciÃ³n del Laboratorio de VirologÃ­a del Hospital de NiÃ±os Dr. Ricardo Gutierrez on behalf of 'Proyecto Argentino Interinstitucional de genomica de SARS-CoV-2' (PAIS Consortium)	Nabaes Jodar et al
Argentina/PAIS-A0139/2020	EPI_ISL_792228	2020-05-15	Laboratorio de VirologÃ­a del Hospital de NiÃ±os Dr. Ricardo Gutierrez	Ãrea de SecuenciaciÃ³n del Laboratorio de VirologÃ­a del Hospital de NiÃ±os Dr. Ricardo Gutierrez on behalf of 'Proyecto Argentino Interinstitucional de genomica de SARS-CoV-2' (PAIS Consortium)	Nabaes Jodar et al
Argentina/PAIS-A0140/2020	EPI_ISL_792229	2020-05-15	Laboratorio de VirologÃ­a del Hospital de NiÃ±os Dr. Ricardo Gutierrez	Ãrea de SecuenciaciÃ³n del Laboratorio de VirologÃ­a del Hospital de NiÃ±os Dr. Ricardo Gutierrez on behalf of 'Proyecto Argentino Interinstitucional de genomica de SARS-CoV-2' (PAIS Consortium)	Nabaes Jodar et al
Argentina/PAIS-A0141/2020	EPI_ISL_792230	2020-05-15	Laboratorio de VirologÃ­a del Hospital de NiÃ±os Dr. Ricardo Gutierrez	Ãrea de SecuenciaciÃ³n del Laboratorio de VirologÃ­a del Hospital de NiÃ±os Dr. Ricardo Gutierrez on behalf of 'Proyecto Argentino Interinstitucional de genomica de SARS-CoV-2' (PAIS Consortium)	Nabaes Jodar et al
Argentina/PAIS-A0142/2020	EPI_ISL_792231	2020-05-15	Laboratorio de VirologÃ­a del Hospital de NiÃ±os Dr. Ricardo Gutierrez	Ãrea de SecuenciaciÃ³n del Laboratorio de VirologÃ­a del Hospital de NiÃ±os Dr. Ricardo Gutierrez on behalf of 'Proyecto Argentino Interinstitucional de genomica de SARS-CoV-2' (PAIS Consortium)	Nabaes Jodar et al
Argentina/PAIS-A0143/2020	EPI_ISL_792232	2020-05-15	Laboratorio de VirologÃ­a del Hospital de NiÃ±os Dr. Ricardo Gutierrez	Ãrea de SecuenciaciÃ³n del Laboratorio de VirologÃ­a del Hospital de NiÃ±os Dr. Ricardo Gutierrez on behalf of 'Proyecto Argentino Interinstitucional de genomica de SARS-CoV-2' (PAIS Consortium)	Nabaes Jodar et al
Argentina/PAIS-A0144/2020	EPI_ISL_792233	2020-05-15	Laboratorio de VirologÃ­a del Hospital de NiÃ±os Dr. Ricardo Gutierrez	Ãrea de SecuenciaciÃ³n del Laboratorio de VirologÃ­a del Hospital de NiÃ±os Dr. Ricardo Gutierrez on behalf of 'Proyecto Argentino Interinstitucional de genomica de SARS-CoV-2' (PAIS Consortium)	Nabaes Jodar et al
Argentina/PAIS-A0145/2020	EPI_ISL_792234	2020-05-15	Laboratorio de VirologÃ­a del Hospital de NiÃ±os Dr. Ricardo Gutierrez	Ãrea de SecuenciaciÃ³n del Laboratorio de VirologÃ­a del Hospital de NiÃ±os Dr. Ricardo Gutierrez on behalf of 'Proyecto Argentino Interinstitucional de genomica de SARS-CoV-2' (PAIS Consortium)	Nabaes Jodar et al
Argentina/PAIS-A0146/2020	EPI_ISL_792235	2020-05-15	Laboratorio de VirologÃ­a del Hospital de NiÃ±os Dr. Ricardo Gutierrez	Ãrea de SecuenciaciÃ³n del Laboratorio de VirologÃ­a del Hospital de NiÃ±os Dr. Ricardo Gutierrez on behalf of 'Proyecto Argentino Interinstitucional de genomica de SARS-CoV-2' (PAIS Consortium)	Nabaes Jodar et al
Argentina/PAIS-A0147/2020	EPI_ISL_792236	2020-05-15	Laboratorio de VirologÃ­a del Hospital de NiÃ±os Dr. Ricardo Gutierrez	Ãrea de SecuenciaciÃ³n del Laboratorio de VirologÃ­a del Hospital de NiÃ±os Dr. Ricardo Gutierrez on behalf of 'Proyecto Argentino Interinstitucional de genomica de SARS-CoV-2' (PAIS Consortium)	Nabaes Jodar et al
Argentina/PAIS-A0148/2020	EPI_ISL_792237	2020-05-15	Laboratorio de VirologÃ­a del Hospital de NiÃ±os Dr. Ricardo Gutierrez	Ãrea de SecuenciaciÃ³n del Laboratorio de VirologÃ­a del Hospital de NiÃ±os Dr. Ricardo Gutierrez on behalf of 'Proyecto Argentino Interinstitucional de genomica de SARS-CoV-2' (PAIS Consortium)	Nabaes Jodar et al
Argentina/PAIS-A0149/2020	EPI_ISL_792238	2020-05-16	Laboratorio de VirologÃ­a del Hospital de NiÃ±os Dr. Ricardo Gutierrez	Ãrea de SecuenciaciÃ³n del Laboratorio de VirologÃ­a del Hospital de NiÃ±os Dr. Ricardo Gutierrez on behalf of 'Proyecto Argentino Interinstitucional de genomica de SARS-CoV-2' (PAIS Consortium)	Nabaes Jodar et al
Argentina/PAIS-A0150/2020	EPI_ISL_792239	2020-05-16	Laboratorio de VirologÃ­a del Hospital de NiÃ±os Dr. Ricardo Gutierrez	Ãrea de SecuenciaciÃ³n del Laboratorio de VirologÃ­a del Hospital de NiÃ±os Dr. Ricardo Gutierrez on behalf of 'Proyecto Argentino Interinstitucional de genomica de SARS-CoV-2' (PAIS Consortium)	Nabaes Jodar et al
Argentina/PAIS-A0151/2020	EPI_ISL_792240	2020-05-16	Laboratorio de VirologÃ­a del Hospital de NiÃ±os Dr. Ricardo Gutierrez	Ãrea de SecuenciaciÃ³n del Laboratorio de VirologÃ­a del Hospital de NiÃ±os Dr. Ricardo Gutierrez on behalf of 'Proyecto Argentino Interinstitucional de genomica de SARS-CoV-2' (PAIS Consortium)	Nabaes Jodar et al
Argentina/PAIS-A0152/2020	EPI_ISL_792241	2020-05-16	Laboratorio de VirologÃ­a del Hospital de NiÃ±os Dr. Ricardo Gutierrez	Ãrea de SecuenciaciÃ³n del Laboratorio de VirologÃ­a del Hospital de NiÃ±os Dr. Ricardo Gutierrez on behalf of 'Proyecto Argentino Interinstitucional de genomica de SARS-CoV-2' (PAIS Consortium)	Nabaes Jodar et al
Argentina/PAIS-A0153/2020	EPI_ISL_792242	2020-05-16	Laboratorio de VirologÃ­a del Hospital de NiÃ±os Dr. Ricardo Gutierrez	Ãrea de SecuenciaciÃ³n del Laboratorio de VirologÃ­a del Hospital de NiÃ±os Dr. Ricardo Gutierrez on behalf of 'Proyecto Argentino Interinstitucional de genomica de SARS-CoV-2' (PAIS Consortium)	Nabaes Jodar et al
Argentina/PAIS-A0154/2020	EPI_ISL_792243	2020-05-16	Laboratorio de VirologÃ­a del Hospital de NiÃ±os Dr. Ricardo Gutierrez	Ãrea de SecuenciaciÃ³n del Laboratorio de VirologÃ­a del Hospital de NiÃ±os Dr. Ricardo Gutierrez on behalf of 'Proyecto Argentino Interinstitucional de genomica de SARS-CoV-2' (PAIS Consortium)	Nabaes Jodar et al
Argentina/PAIS-A0155/2020	EPI_ISL_792244	2020-05-17	Laboratorio de VirologÃ­a del Hospital de NiÃ±os Dr. Ricardo Gutierrez	Ãrea de SecuenciaciÃ³n del Laboratorio de VirologÃ­a del Hospital de NiÃ±os Dr. Ricardo Gutierrez on behalf of 'Proyecto Argentino Interinstitucional de genomica de SARS-CoV-2' (PAIS Consortium)	Nabaes Jodar et al
Argentina/PAIS-A0156/2020	EPI_ISL_792245	2020-05-17	Laboratorio de VirologÃ­a del Hospital de NiÃ±os Dr. Ricardo Gutierrez	Ãrea de SecuenciaciÃ³n del Laboratorio de VirologÃ­a del Hospital de NiÃ±os Dr. Ricardo Gutierrez on behalf of 'Proyecto Argentino Interinstitucional de genomica de SARS-CoV-2' (PAIS Consortium)	Nabaes Jodar et al
Argentina/PAIS-A0157/2020	EPI_ISL_792246	2020-05-17	Laboratorio de VirologÃ­a del Hospital de NiÃ±os Dr. Ricardo Gutierrez	Ãrea de SecuenciaciÃ³n del Laboratorio de VirologÃ­a del Hospital de NiÃ±os Dr. Ricardo Gutierrez on behalf of 'Proyecto Argentino Interinstitucional de genomica de SARS-CoV-2' (PAIS Consortium)	Nabaes Jodar et al
Argentina/PAIS-A0158/2020	EPI_ISL_792247	2020-05-17	Laboratorio de VirologÃ­a del Hospital de NiÃ±os Dr. Ricardo Gutierrez	Ãrea de SecuenciaciÃ³n del Laboratorio de VirologÃ­a del Hospital de NiÃ±os Dr. Ricardo Gutierrez on behalf of 'Proyecto Argentino Interinstitucional de genomica de SARS-CoV-2' (PAIS Consortium)	Nabaes Jodar et al
Argentina/PAIS-A0159/2020	EPI_ISL_792248	2020-05-18	Laboratorio de VirologÃ­a del Hospital de NiÃ±os Dr. Ricardo Gutierrez	Ãrea de SecuenciaciÃ³n del Laboratorio de VirologÃ­a del Hospital de NiÃ±os Dr. Ricardo Gutierrez on behalf of 'Proyecto Argentino Interinstitucional de genomica de SARS-CoV-2' (PAIS Consortium)	Nabaes Jodar et al
Argentina/PAIS-A0160/2020	EPI_ISL_792249	2020-05-18	Laboratorio de VirologÃ­a del Hospital de NiÃ±os Dr. Ricardo Gutierrez	Ãrea de SecuenciaciÃ³n del Laboratorio de VirologÃ­a del Hospital de NiÃ±os Dr. Ricardo Gutierrez on behalf of 'Proyecto Argentino Interinstitucional de genomica de SARS-CoV-2' (PAIS Consortium)	Nabaes Jodar et al
Argentina/PAIS-A0161/2020	EPI_ISL_792250	2020-05-18	Laboratorio de VirologÃ­a del Hospital de NiÃ±os Dr. Ricardo Gutierrez	Ãrea de SecuenciaciÃ³n del Laboratorio de VirologÃ­a del Hospital de NiÃ±os Dr. Ricardo Gutierrez on behalf of 'Proyecto Argentino Interinstitucional de genomica de SARS-CoV-2' (PAIS Consortium)	Nabaes Jodar et al
Argentina/PAIS-A0162/2020	EPI_ISL_792251	2020-05-18	Laboratorio de VirologÃ­a del Hospital de NiÃ±os Dr. Ricardo Gutierrez	Ãrea de SecuenciaciÃ³n del Laboratorio de VirologÃ­a del Hospital de NiÃ±os Dr. Ricardo Gutierrez on behalf of 'Proyecto Argentino Interinstitucional de genomica de SARS-CoV-2' (PAIS Consortium)	Nabaes Jodar et al
Argentina/PAIS-A0163/2020	EPI_ISL_792252	2020-05-18	Laboratorio de VirologÃ­a del Hospital de NiÃ±os Dr. Ricardo Gutierrez	Ãrea de SecuenciaciÃ³n del Laboratorio de VirologÃ­a del Hospital de NiÃ±os Dr. Ricardo Gutierrez on behalf of 'Proyecto Argentino Interinstitucional de genomica de SARS-CoV-2' (PAIS Consortium)	Nabaes Jodar et al
Argentina/PAIS-A0164/2020	EPI_ISL_792253	2020-05-19	Laboratorio de VirologÃ­a del Hospital de NiÃ±os Dr. Ricardo Gutierrez	Ãrea de SecuenciaciÃ³n del Laboratorio de VirologÃ­a del Hospital de NiÃ±os Dr. Ricardo Gutierrez on behalf of 'Proyecto Argentino Interinstitucional de genomica de SARS-CoV-2' (PAIS Consortium)	Nabaes Jodar et al
Argentina/PAIS-A0165/2020	EPI_ISL_792254	2020-05-19	Laboratorio de VirologÃ­a del Hospital de NiÃ±os Dr. Ricardo Gutierrez	Ãrea de SecuenciaciÃ³n del Laboratorio de VirologÃ­a del Hospital de NiÃ±os Dr. Ricardo Gutierrez on behalf of 'Proyecto Argentino Interinstitucional de genomica de SARS-CoV-2' (PAIS Consortium)	Nabaes Jodar et al
Argentina/PAIS-A0166/2020	EPI_ISL_792255	2020-05-19	Laboratorio de VirologÃ­a del Hospital de NiÃ±os Dr. Ricardo Gutierrez	Ãrea de SecuenciaciÃ³n del Laboratorio de VirologÃ­a del Hospital de NiÃ±os Dr. Ricardo Gutierrez on behalf of 'Proyecto Argentino Interinstitucional de genomica de SARS-CoV-2' (PAIS Consortium)	Nabaes Jodar et al
Argentina/PAIS-A0167/2020	EPI_ISL_792256	2020-05-19	Laboratorio de VirologÃ­a del Hospital de NiÃ±os Dr. Ricardo Gutierrez	Ãrea de SecuenciaciÃ³n del Laboratorio de VirologÃ­a del Hospital de NiÃ±os Dr. Ricardo Gutierrez on behalf of 'Proyecto Argentino Interinstitucional de genomica de SARS-CoV-2' (PAIS Consortium)	Nabaes Jodar et al
Argentina/PAIS-A0168/2020	EPI_ISL_792257	2020-05-19	Laboratorio de VirologÃ­a del Hospital de NiÃ±os Dr. Ricardo Gutierrez	Ãrea de SecuenciaciÃ³n del Laboratorio de VirologÃ­a del Hospital de NiÃ±os Dr. Ricardo Gutierrez on behalf of 'Proyecto Argentino Interinstitucional de genomica de SARS-CoV-2' (PAIS Consortium)	Nabaes Jodar et al
Argentina/PAIS-A0169/2020	EPI_ISL_792258	2020-05-19	Laboratorio de VirologÃ­a del Hospital de NiÃ±os Dr. Ricardo Gutierrez	Ãrea de SecuenciaciÃ³n del Laboratorio de VirologÃ­a del Hospital de NiÃ±os Dr. Ricardo Gutierrez on behalf of 'Proyecto Argentino Interinstitucional de genomica de SARS-CoV-2' (PAIS Consortium)	Nabaes Jodar et al
Argentina/PAIS-A0170/2020	EPI_ISL_792259	2020-05-19	Laboratorio de VirologÃ­a del Hospital de NiÃ±os Dr. Ricardo Gutierrez	Ãrea de SecuenciaciÃ³n del Laboratorio de VirologÃ­a del Hospital de NiÃ±os Dr. Ricardo Gutierrez on behalf of 'Proyecto Argentino Interinstitucional de genomica de SARS-CoV-2' (PAIS Consortium)	Nabaes Jodar et al
Argentina/PAIS-A0171/2020	EPI_ISL_792260	2020-05-19	Laboratorio de VirologÃ­a del Hospital de NiÃ±os Dr. Ricardo Gutierrez	Ãrea de SecuenciaciÃ³n del Laboratorio de VirologÃ­a del Hospital de NiÃ±os Dr. Ricardo Gutierrez on behalf of 'Proyecto Argentino Interinstitucional de genomica de SARS-CoV-2' (PAIS Consortium)	Nabaes Jodar et al
Argentina/PAIS-A0172/2020	EPI_ISL_792261	2020-05-19	Laboratorio de VirologÃ­a del Hospital de NiÃ±os Dr. Ricardo Gutierrez	Ãrea de SecuenciaciÃ³n del Laboratorio de VirologÃ­a del Hospital de NiÃ±os Dr. Ricardo Gutierrez on behalf of 'Proyecto Argentino Interinstitucional de genomica de SARS-CoV-2' (PAIS Consortium)	Nabaes Jodar et al
Argentina/PAIS-A0173/2020	EPI_ISL_792262	2020-05-19	Laboratorio de VirologÃ­a del Hospital de NiÃ±os Dr. Ricardo Gutierrez	Ãrea de SecuenciaciÃ³n del Laboratorio de VirologÃ­a del Hospital de NiÃ±os Dr. Ricardo Gutierrez on behalf of 'Proyecto Argentino Interinstitucional de genomica de SARS-CoV-2' (PAIS Consortium)	Nabaes Jodar et al
Argentina/PAIS-A0174/2020	EPI_ISL_792263	2020-05-19	Laboratorio de VirologÃ­a del Hospital de NiÃ±os Dr. Ricardo Gutierrez	Ãrea de SecuenciaciÃ³n del Laboratorio de VirologÃ­a del Hospital de NiÃ±os Dr. Ricardo Gutierrez on behalf of 'Proyecto Argentino Interinstitucional de genomica de SARS-CoV-2' (PAIS Consortium)	Nabaes Jodar et al
Argentina/PAIS-A0175/2020	EPI_ISL_792264	2020-05-19	Laboratorio de VirologÃ­a del Hospital de NiÃ±os Dr. Ricardo Gutierrez	Ãrea de SecuenciaciÃ³n del Laboratorio de VirologÃ­a del Hospital de NiÃ±os Dr. Ricardo Gutierrez on behalf of 'Proyecto Argentino Interinstitucional de genomica de SARS-CoV-2' (PAIS Consortium)	Nabaes Jodar et al
Argentina/PAIS-A0176/2020	EPI_ISL_792265	2020-05-19	Laboratorio de VirologÃ­a del Hospital de NiÃ±os Dr. Ricardo Gutierrez	Ãrea de SecuenciaciÃ³n del Laboratorio de VirologÃ­a del Hospital de NiÃ±os Dr. Ricardo Gutierrez on behalf of 'Proyecto Argentino Interinstitucional de genomica de SARS-CoV-2' (PAIS Consortium)	Nabaes Jodar et al
Argentina/PAIS-A0177/2020	EPI_ISL_792266	2020-05-19	Laboratorio de VirologÃ­a del Hospital de NiÃ±os Dr. Ricardo Gutierrez	Ãrea de SecuenciaciÃ³n del Laboratorio de VirologÃ­a del Hospital de NiÃ±os Dr. Ricardo Gutierrez on behalf of 'Proyecto Argentino Interinstitucional de genomica de SARS-CoV-2' (PAIS Consortium)	Nabaes Jodar et al
Argentina/PAIS-A0178/2020	EPI_ISL_792267	2020-05-19	Laboratorio de VirologÃ­a del Hospital de NiÃ±os Dr. Ricardo Gutierrez	Ãrea de SecuenciaciÃ³n del Laboratorio de VirologÃ­a del Hospital de NiÃ±os Dr. Ricardo Gutierrez on behalf of 'Proyecto Argentino Interinstitucional de genomica de SARS-CoV-2' (PAIS Consortium)	Nabaes Jodar et al
Argentina/PAIS-A0179/2020	EPI_ISL_792268	2020-05-19	Laboratorio de VirologÃ­a del Hospital de NiÃ±os Dr. Ricardo Gutierrez	Ãrea de SecuenciaciÃ³n del Laboratorio de VirologÃ­a del Hospital de NiÃ±os Dr. Ricardo Gutierrez on behalf of 'Proyecto Argentino Interinstitucional de genomica de SARS-CoV-2' (PAIS Consortium)	Nabaes Jodar et al
Argentina/PAIS-A0180/2020	EPI_ISL_792269	2020-05-20	Laboratorio de VirologÃ­a del Hospital de NiÃ±os Dr. Ricardo Gutierrez	Ãrea de SecuenciaciÃ³n del Laboratorio de VirologÃ­a del Hospital de NiÃ±os Dr. Ricardo Gutierrez on behalf of 'Proyecto Argentino Interinstitucional de genomica de SARS-CoV-2' (PAIS Consortium)	Nabaes Jodar et al
Argentina/PAIS-A0181/2020	EPI_ISL_792270	2020-05-20	Laboratorio de VirologÃ­a del Hospital de NiÃ±os Dr. Ricardo Gutierrez	Ãrea de SecuenciaciÃ³n del Laboratorio de VirologÃ­a del Hospital de NiÃ±os Dr. Ricardo Gutierrez on behalf of 'Proyecto Argentino Interinstitucional de genomica de SARS-CoV-2' (PAIS Consortium)	Nabaes Jodar et al
Argentina/PAIS-A0182/2020	EPI_ISL_792271	2020-05-20	Laboratorio de VirologÃ­a del Hospital de NiÃ±os Dr. Ricardo Gutierrez	Ãrea de SecuenciaciÃ³n del Laboratorio de VirologÃ­a del Hospital de NiÃ±os Dr. Ricardo Gutierrez on behalf of 'Proyecto Argentino Interinstitucional de genomica de SARS-CoV-2' (PAIS Consortium)	Nabaes Jodar et al
Argentina/PAIS-A0183/2020	EPI_ISL_792272	2020-05-20	Laboratorio de VirologÃ­a del Hospital de NiÃ±os Dr. Ricardo Gutierrez	Ãrea de SecuenciaciÃ³n del Laboratorio de VirologÃ­a del Hospital de NiÃ±os Dr. Ricardo Gutierrez on behalf of 'Proyecto Argentino Interinstitucional de genomica de SARS-CoV-2' (PAIS Consortium)	Nabaes Jodar et al
Argentina/PAIS-A0184/2020	EPI_ISL_792273	2020-05-20	Laboratorio de VirologÃ­a del Hospital de NiÃ±os Dr. Ricardo Gutierrez	Ãrea de SecuenciaciÃ³n del Laboratorio de VirologÃ­a del Hospital de NiÃ±os Dr. Ricardo Gutierrez on behalf of 'Proyecto Argentino Interinstitucional de genomica de SARS-CoV-2' (PAIS Consortium)	Nabaes Jodar et al
Argentina/PAIS-A0185/2020	EPI_ISL_792274	2020-05-20	Laboratorio de VirologÃ­a del Hospital de NiÃ±os Dr. Ricardo Gutierrez	Ãrea de SecuenciaciÃ³n del Laboratorio de VirologÃ­a del Hospital de NiÃ±os Dr. Ricardo Gutierrez on behalf of 'Proyecto Argentino Interinstitucional de genomica de SARS-CoV-2' (PAIS Consortium)	Nabaes Jodar et al
Argentina/PAIS-A0186/2020	EPI_ISL_792275	2020-05-20	Laboratorio de VirologÃ­a del Hospital de NiÃ±os Dr. Ricardo Gutierrez	Ãrea de SecuenciaciÃ³n del Laboratorio de VirologÃ­a del Hospital de NiÃ±os Dr. Ricardo Gutierrez on behalf of 'Proyecto Argentino Interinstitucional de genomica de SARS-CoV-2' (PAIS Consortium)	Nabaes Jodar et al
Argentina/PAIS-A0187/2020	EPI_ISL_792276	2020-05-20	Laboratorio de VirologÃ­a del Hospital de NiÃ±os Dr. Ricardo Gutierrez	Ãrea de SecuenciaciÃ³n del Laboratorio de VirologÃ­a del Hospital de NiÃ±os Dr. Ricardo Gutierrez on behalf of 'Proyecto Argentino Interinstitucional de genomica de SARS-CoV-2' (PAIS Consortium)	Nabaes Jodar et al
Argentina/PAIS-A0188/2020	EPI_ISL_792277	2020-05-20	Laboratorio de VirologÃ­a del Hospital de NiÃ±os Dr. Ricardo Gutierrez	Ãrea de SecuenciaciÃ³n del Laboratorio de VirologÃ­a del Hospital de NiÃ±os Dr. Ricardo Gutierrez on behalf of 'Proyecto Argentino Interinstitucional de genomica de SARS-CoV-2' (PAIS Consortium)	Nabaes Jodar et al
Argentina/PAIS-A0189/2020	EPI_ISL_792278	2020-05-20	Laboratorio de VirologÃ­a del Hospital de NiÃ±os Dr. Ricardo Gutierrez	Ãrea de SecuenciaciÃ³n del Laboratorio de VirologÃ­a del Hospital de NiÃ±os Dr. Ricardo Gutierrez on behalf of 'Proyecto Argentino Interinstitucional de genomica de SARS-CoV-2' (PAIS Consortium)	Nabaes Jodar et al
Argentina/PAIS-A0190/2020	EPI_ISL_792279	2020-05-20	Laboratorio de VirologÃ­a del Hospital de NiÃ±os Dr. Ricardo Gutierrez	Ãrea de SecuenciaciÃ³n del Laboratorio de VirologÃ­a del Hospital de NiÃ±os Dr. Ricardo Gutierrez on behalf of 'Proyecto Argentino Interinstitucional de genomica de SARS-CoV-2' (PAIS Consortium)	Nabaes Jodar et al
Argentina/PAIS-A0191/2020	EPI_ISL_792280	2020-05-20	Laboratorio de VirologÃ­a del Hospital de NiÃ±os Dr. Ricardo Gutierrez	Ãrea de SecuenciaciÃ³n del Laboratorio de VirologÃ­a del Hospital de NiÃ±os Dr. Ricardo Gutierrez on behalf of 'Proyecto Argentino Interinstitucional de genomica de SARS-CoV-2' (PAIS Consortium)	Nabaes Jodar et al
Argentina/PAIS-A0192/2020	EPI_ISL_792281	2020-05-20	Laboratorio de VirologÃ­a del Hospital de NiÃ±os Dr. Ricardo Gutierrez	Ãrea de SecuenciaciÃ³n del Laboratorio de VirologÃ­a del Hospital de NiÃ±os Dr. Ricardo Gutierrez on behalf of 'Proyecto Argentino Interinstitucional de genomica de SARS-CoV-2' (PAIS Consortium)	Nabaes Jodar et al
Argentina/PAIS-A0193/2020	EPI_ISL_792282	2020-05-20	Laboratorio de VirologÃ­a del Hospital de NiÃ±os Dr. Ricardo Gutierrez	Ãrea de SecuenciaciÃ³n del Laboratorio de VirologÃ­a del Hospital de NiÃ±os Dr. Ricardo Gutierrez on behalf of 'Proyecto Argentino Interinstitucional de genomica de SARS-CoV-2' (PAIS Consortium)	Nabaes Jodar et al
Argentina/PAIS-A0194/2020	EPI_ISL_792283	2020-05-21	Laboratorio de VirologÃ­a del Hospital de NiÃ±os Dr. Ricardo Gutierrez	Ãrea de SecuenciaciÃ³n del Laboratorio de VirologÃ­a del Hospital de NiÃ±os Dr. Ricardo Gutierrez on behalf of 'Proyecto Argentino Interinstitucional de genomica de SARS-CoV-2' (PAIS Consortium)	Nabaes Jodar et al
Argentina/PAIS-A0195/2020	EPI_ISL_792284	2020-05-21	Laboratorio de VirologÃ­a del Hospital de NiÃ±os Dr. Ricardo Gutierrez	Ãrea de SecuenciaciÃ³n del Laboratorio de VirologÃ­a del Hospital de NiÃ±os Dr. Ricardo Gutierrez on behalf of 'Proyecto Argentino Interinstitucional de genomica de SARS-CoV-2' (PAIS Consortium)	Nabaes Jodar et al
Argentina/PAIS-A0196/2020	EPI_ISL_792285	2020-05-21	Laboratorio de VirologÃ­a del Hospital de NiÃ±os Dr. Ricardo Gutierrez	Ãrea de SecuenciaciÃ³n del Laboratorio de VirologÃ­a del Hospital de NiÃ±os Dr. Ricardo Gutierrez on behalf of 'Proyecto Argentino Interinstitucional de genomica de SARS-CoV-2' (PAIS Consortium)	Nabaes Jodar et al
Argentina/PAIS-A0197/2020	EPI_ISL_792286	2020-05-01	Laboratorio de VirologÃ­a del Hospital de NiÃ±os Dr. Ricardo Gutierrez	Ãrea de SecuenciaciÃ³n del Laboratorio de VirologÃ­a del Hospital de NiÃ±os Dr. Ricardo Gutierrez on behalf of 'Proyecto Argentino Interinstitucional de genomica de SARS-CoV-2' (PAIS Consortium)	Nabaes Jodar et al
Argentina/PAIS-A0199/2020	EPI_ISL_792287	2020-05-07	Laboratorio de VirologÃ­a del Hospital de NiÃ±os Dr. Ricardo Gutierrez	Ãrea de SecuenciaciÃ³n del Laboratorio de VirologÃ­a del Hospital de NiÃ±os Dr. Ricardo Gutierrez on behalf of 'Proyecto Argentino Interinstitucional de genomica de SARS-CoV-2' (PAIS Consortium)	Nabaes Jodar et al
Argentina/PAIS-A0200/2020	EPI_ISL_792288	2020-05-07	Laboratorio de VirologÃ­a del Hospital de NiÃ±os Dr. Ricardo Gutierrez	Ãrea de SecuenciaciÃ³n del Laboratorio de VirologÃ­a del Hospital de NiÃ±os Dr. Ricardo Gutierrez on behalf of 'Proyecto Argentino Interinstitucional de genomica de SARS-CoV-2' (PAIS Consortium)	Nabaes Jodar et al
Argentina/PAIS-A0203/2020	EPI_ISL_792289	2020-05-08	Laboratorio de VirologÃ­a del Hospital de NiÃ±os Dr. Ricardo Gutierrez	Ãrea de SecuenciaciÃ³n del Laboratorio de VirologÃ­a del Hospital de NiÃ±os Dr. Ricardo Gutierrez on behalf of 'Proyecto Argentino Interinstitucional de genomica de SARS-CoV-2' (PAIS Consortium)	Nabaes Jodar et al
Argentina/PAIS-A0204/2020	EPI_ISL_792290	2020-05-10	Laboratorio de VirologÃ­a del Hospital de NiÃ±os Dr. Ricardo Gutierrez	Ãrea de SecuenciaciÃ³n del Laboratorio de VirologÃ­a del Hospital de NiÃ±os Dr. Ricardo Gutierrez on behalf of 'Proyecto Argentino Interinstitucional de genomica de SARS-CoV-2' (PAIS Consortium)	Nabaes Jodar et al
Argentina/PAIS-A0205/2020	EPI_ISL_792291	2020-04-21	Laboratorio de genÃ©tica y biologÃ­a molecular del Hospital de trauma y emergencia Dr Federico Abete	Ãrea de SecuenciaciÃ³n del Laboratorio de VirologÃ­a del Hospital de NiÃ±os Dr. Ricardo Gutierrez on behalf of 'Proyecto Argentino Interinstitucional de genomica de SARS-CoV-2' (PAIS Consortium)	Nabaes Jodar et al
Argentina/PAIS-A0207/2020	EPI_ISL_792292	2020-04-28	Laboratorio de genÃ©tica y biologÃ­a molecular del Hospital de trauma y emergencia Dr Federico Abete	Ãrea de SecuenciaciÃ³n del Laboratorio de VirologÃ­a del Hospital de NiÃ±os Dr. Ricardo Gutierrez on behalf of 'Proyecto Argentino Interinstitucional de genomica de SARS-CoV-2' (PAIS Consortium)	Nabaes Jodar et al
Argentina/PAIS-A0208/2020	EPI_ISL_792293	2020-04-22	Laboratorio de genÃ©tica y biologÃ­a molecular del Hospital de trauma y emergencia Dr Federico Abete	Ãrea de SecuenciaciÃ³n del Laboratorio de VirologÃ­a del Hospital de NiÃ±os Dr. Ricardo Gutierrez on behalf of 'Proyecto Argentino Interinstitucional de genomica de SARS-CoV-2' (PAIS Consortium)	Nabaes Jodar et al
Argentina/PAIS-A0209/2020	EPI_ISL_792294	2020-04-22	Laboratorio de genÃ©tica y biologÃ­a molecular del Hospital de trauma y emergencia Dr Federico Abete	Ãrea de SecuenciaciÃ³n del Laboratorio de VirologÃ­a del Hospital de NiÃ±os Dr. Ricardo Gutierrez on behalf of 'Proyecto Argentino Interinstitucional de genomica de SARS-CoV-2' (PAIS Consortium)	Nabaes Jodar et al
Argentina/PAIS-A0210/2020	EPI_ISL_792295	2020-04-25	Laboratorio de genÃ©tica y biologÃ­a molecular del Hospital de trauma y emergencia Dr Federico Abete	Ãrea de SecuenciaciÃ³n del Laboratorio de VirologÃ­a del Hospital de NiÃ±os Dr. Ricardo Gutierrez on behalf of 'Proyecto Argentino Interinstitucional de genomica de SARS-CoV-2' (PAIS Consortium)	Nabaes Jodar et al
Argentina/PAIS-A0212/2020	EPI_ISL_792296	2020-04-28	Laboratorio de genÃ©tica y biologÃ­a molecular del Hospital de trauma y emergencia Dr Federico Abete	Ãrea de SecuenciaciÃ³n del Laboratorio de VirologÃ­a del Hospital de NiÃ±os Dr. Ricardo Gutierrez on behalf of 'Proyecto Argentino Interinstitucional de genomica de SARS-CoV-2' (PAIS Consortium)	Nabaes Jodar et al
Argentina/PAIS-A0214/2020	EPI_ISL_792297	2020-04-28	Laboratorio de genÃ©tica y biologÃ­a molecular del Hospital de trauma y emergencia Dr Federico Abete	Ãrea de SecuenciaciÃ³n del Laboratorio de VirologÃ­a del Hospital de NiÃ±os Dr. Ricardo Gutierrez on behalf of 'Proyecto Argentino Interinstitucional de genomica de SARS-CoV-2' (PAIS Consortium)	Nabaes Jodar et al
Argentina/PAIS-A0215/2020	EPI_ISL_792298	2020-04-25	Laboratorio de genÃ©tica y biologÃ­a molecular del Hospital de trauma y emergencia Dr Federico Abete	Ãrea de SecuenciaciÃ³n del Laboratorio de VirologÃ­a del Hospital de NiÃ±os Dr. Ricardo Gutierrez on behalf of 'Proyecto Argentino Interinstitucional de genomica de SARS-CoV-2' (PAIS Consortium)	Nabaes Jodar et al
Argentina/PAIS-A0216/2020	EPI_ISL_792299	2020-05-19	Laboratorio del Hospital AlemÃ¡n	Ãrea de SecuenciaciÃ³n del Laboratorio de VirologÃ­a del Hospital de NiÃ±os Dr. Ricardo Gutierrez on behalf of 'Proyecto Argentino Interinstitucional de genomica de SARS-CoV-2' (PAIS Consortium)	Nabaes Jodar et al
Argentina/PAIS-A0217/2020	EPI_ISL_792300	2020-05-27	Laboratorio del Hospital AlemÃ¡n	Ãrea de SecuenciaciÃ³n del Laboratorio de VirologÃ­a del Hospital de NiÃ±os Dr. Ricardo Gutierrez on behalf of 'Proyecto Argentino Interinstitucional de genomica de SARS-CoV-2' (PAIS Consortium)	Nabaes Jodar et al
Argentina/PAIS-A0219/2020	EPI_ISL_792301	2020-04-28	Departamento de BiologÃ­a y genÃ©tica molecular, IACA Laboratorios.	Ãrea de SecuenciaciÃ³n del Laboratorio de VirologÃ­a del Hospital de NiÃ±os Dr. Ricardo Gutierrez on behalf of 'Proyecto Argentino Interinstitucional de genomica de SARS-CoV-2' (PAIS Consortium)	Nabaes Jodar et al
Argentina/PAIS-A0221/2020	EPI_ISL_792302	2020-03-25	Unidad de VirologÃ­a, Centro de EducaciÃ³n MÃ©dica en Investigaciones ClÃ­nicas CEMIC	Ãrea de SecuenciaciÃ³n del Laboratorio de VirologÃ­a del Hospital de NiÃ±os Dr. Ricardo Gutierrez on behalf of 'Proyecto Argentino Interinstitucional de genomica de SARS-CoV-2' (PAIS Consortium)	Nabaes Jodar et al
Argentina/PAIS-A0222/2020	EPI_ISL_792303	2020-03-28	Unidad de VirologÃ­a, Centro de EducaciÃ³n MÃ©dica en Investigaciones ClÃ­nicas CEMIC	Ãrea de SecuenciaciÃ³n del Laboratorio de VirologÃ­a del Hospital de NiÃ±os Dr. Ricardo Gutierrez on behalf of 'Proyecto Argentino Interinstitucional de genomica de SARS-CoV-2' (PAIS Consortium)	Nabaes Jodar et al
Argentina/PAIS-A0223/2020	EPI_ISL_792304	2020-03-23	Unidad de VirologÃ­a, Centro de EducaciÃ³n MÃ©dica en Investigaciones ClÃ­nicas CEMIC	Ãrea de SecuenciaciÃ³n del Laboratorio de VirologÃ­a del Hospital de NiÃ±os Dr. Ricardo Gutierrez on behalf of 'Proyecto Argentino Interinstitucional de genomica de SARS-CoV-2' (PAIS Consortium)	Nabaes Jodar et al
Argentina/PAIS-A0224/2020	EPI_ISL_792305	2020-05-26	Unidad de VirologÃ­a, Centro de EducaciÃ³n MÃ©dica en Investigaciones ClÃ­nicas CEMIC	Ãrea de SecuenciaciÃ³n del Laboratorio de VirologÃ­a del Hospital de NiÃ±os Dr. Ricardo Gutierrez on behalf of 'Proyecto Argentino Interinstitucional de genomica de SARS-CoV-2' (PAIS Consortium)	Nabaes Jodar et al
Argentina/PAIS-A0225/2020	EPI_ISL_792306	2020-04-24	Laboratorio del Hospital El Cruce Dr. NÃ©stor C. Kirchner	Ãrea de SecuenciaciÃ³n del Laboratorio de VirologÃ­a del Hospital de NiÃ±os Dr. Ricardo Gutierrez on behalf of 'Proyecto Argentino Interinstitucional de genomica de SARS-CoV-2' (PAIS Consortium)	Nabaes Jodar et al
Argentina/PAIS-A0226/2020	EPI_ISL_792307	2020-05-18	Laboratorio del Hospital El Cruce Dr. NÃ©stor C. Kirchner	Ãrea de SecuenciaciÃ³n del Laboratorio de VirologÃ­a del Hospital de NiÃ±os Dr. Ricardo Gutierrez on behalf of 'Proyecto Argentino Interinstitucional de genomica de SARS-CoV-2' (PAIS Consortium)	Nabaes Jodar et al
Argentina/PAIS-A0227/2020	EPI_ISL_792308	2020-05-18	Laboratorio del Hospital El Cruce Dr. NÃ©stor C. Kirchner	Ãrea de SecuenciaciÃ³n del Laboratorio de VirologÃ­a del Hospital de NiÃ±os Dr. Ricardo Gutierrez on behalf of 'Proyecto Argentino Interinstitucional de genomica de SARS-CoV-2' (PAIS Consortium)	Nabaes Jodar et al
Argentina/PAIS-A0228/2020	EPI_ISL_792309	2020-05-20	Laboratorio del Hospital El Cruce Dr. NÃ©stor C. Kirchner	Ãrea de SecuenciaciÃ³n del Laboratorio de VirologÃ­a del Hospital de NiÃ±os Dr. Ricardo Gutierrez on behalf of 'Proyecto Argentino Interinstitucional de genomica de SARS-CoV-2' (PAIS Consortium)	Nabaes Jodar et al
Argentina/PAIS-A0229/2020	EPI_ISL_792310	2020-05-20	Laboratorio del Hospital El Cruce Dr. NÃ©stor C. Kirchner	Ãrea de SecuenciaciÃ³n del Laboratorio de VirologÃ­a del Hospital de NiÃ±os Dr. Ricardo Gutierrez on behalf of 'Proyecto Argentino Interinstitucional de genomica de SARS-CoV-2' (PAIS Consortium)	Nabaes Jodar et al
Argentina/PAIS-A0230/2020	EPI_ISL_792311	2020-05-21	Laboratorio del Hospital El Cruce Dr. NÃ©stor C. Kirchner	Ãrea de SecuenciaciÃ³n del Laboratorio de VirologÃ­a del Hospital de NiÃ±os Dr. Ricardo Gutierrez on behalf of 'Proyecto Argentino Interinstitucional de genomica de SARS-CoV-2' (PAIS Consortium)	Nabaes Jodar et al
Argentina/PAIS-A0231/2020	EPI_ISL_792312	2020-04-27	Laboratorio del Hospital El Cruce Dr. NÃ©stor C. Kirchner	Ãrea de SecuenciaciÃ³n del Laboratorio de VirologÃ­a del Hospital de NiÃ±os Dr. Ricardo Gutierrez on behalf of 'Proyecto Argentino Interinstitucional de genomica de SARS-CoV-2' (PAIS Consortium)	Nabaes Jodar et al
Argentina/PAIS-A0232/2020	EPI_ISL_792313	2020-04-27	Laboratorio del Hospital El Cruce Dr. NÃ©stor C. Kirchner	Ãrea de SecuenciaciÃ³n del Laboratorio de VirologÃ­a del Hospital de NiÃ±os Dr. Ricardo Gutierrez on behalf of 'Proyecto Argentino Interinstitucional de genomica de SARS-CoV-2' (PAIS Consortium)	Nabaes Jodar et al
Argentina/PAIS-A0233/2020	EPI_ISL_792314	2020-04-30	Laboratorio del Hospital El Cruce Dr. NÃ©stor C. Kirchner	Ãrea de SecuenciaciÃ³n del Laboratorio de VirologÃ­a del Hospital de NiÃ±os Dr. Ricardo Gutierrez on behalf of 'Proyecto Argentino Interinstitucional de genomica de SARS-CoV-2' (PAIS Consortium)	Nabaes Jodar et al
Argentina/PAIS-A0234/2020	EPI_ISL_792315	2020-04-26	Laboratorio del Hospital El Cruce Dr. NÃ©stor C. Kirchner	Ãrea de SecuenciaciÃ³n del Laboratorio de VirologÃ­a del Hospital de NiÃ±os Dr. Ricardo Gutierrez on behalf of 'Proyecto Argentino Interinstitucional de genomica de SARS-CoV-2' (PAIS Consortium)	Nabaes Jodar et al
Argentina/PAIS-A0235/2020	EPI_ISL_792316	2020-05-07	Laboratorio del Hospital El Cruce Dr. NÃ©stor C. Kirchner	Ãrea de SecuenciaciÃ³n del Laboratorio de VirologÃ­a del Hospital de NiÃ±os Dr. Ricardo Gutierrez on behalf of 'Proyecto Argentino Interinstitucional de genomica de SARS-CoV-2' (PAIS Consortium)	Nabaes Jodar et al
Argentina/PAIS-A0236/2020	EPI_ISL_792317	2020-05-13	Laboratorio del Hospital El Cruce Dr. NÃ©stor C. Kirchner	Ãrea de SecuenciaciÃ³n del Laboratorio de VirologÃ­a del Hospital de NiÃ±os Dr. Ricardo Gutierrez on behalf of 'Proyecto Argentino Interinstitucional de genomica de SARS-CoV-2' (PAIS Consortium)	Nabaes Jodar et al
Argentina/PAIS-A0237/2020	EPI_ISL_792318	2020-05-16	Laboratorio del Hospital El Cruce Dr. NÃ©stor C. Kirchner	Ãrea de SecuenciaciÃ³n del Laboratorio de VirologÃ­a del Hospital de NiÃ±os Dr. Ricardo Gutierrez on behalf of 'Proyecto Argentino Interinstitucional de genomica de SARS-CoV-2' (PAIS Consortium)	Nabaes Jodar et al
Argentina/PAIS-A0238/2020	EPI_ISL_792319	2020-05-16	Laboratorio del Hospital El Cruce Dr. NÃ©stor C. Kirchner	Ãrea de SecuenciaciÃ³n del Laboratorio de VirologÃ­a del Hospital de NiÃ±os Dr. Ricardo Gutierrez on behalf of 'Proyecto Argentino Interinstitucional de genomica de SARS-CoV-2' (PAIS Consortium)	Nabaes Jodar et al
Argentina/PAIS-A0239/2020	EPI_ISL_792320	2020-04-13	Instituto de Investigaciones BiomÃ©dicas en Retrovirus y SIDA	Ãrea de SecuenciaciÃ³n del Laboratorio de VirologÃ­a del Hospital de NiÃ±os Dr. Ricardo Gutierrez on behalf of 'Proyecto Argentino Interinstitucional de genomica de SARS-CoV-2' (PAIS Consortium)	Nabaes Jodar et al
Argentina/PAIS-A0241/2020	EPI_ISL_792321	2020-05-11	Instituto de Investigaciones BiomÃ©dicas en Retrovirus y SIDA	Ãrea de SecuenciaciÃ³n del Laboratorio de VirologÃ­a del Hospital de NiÃ±os Dr. Ricardo Gutierrez on behalf of 'Proyecto Argentino Interinstitucional de genomica de SARS-CoV-2' (PAIS Consortium)	Nabaes Jodar et al
Argentina/PAIS-A0242/2020	EPI_ISL_792322	2020-05-12	Instituto de Investigaciones BiomÃ©dicas en Retrovirus y SIDA	Ãrea de SecuenciaciÃ³n del Laboratorio de VirologÃ­a del Hospital de NiÃ±os Dr. Ricardo Gutierrez on behalf of 'Proyecto Argentino Interinstitucional de genomica de SARS-CoV-2' (PAIS Consortium)	Nabaes Jodar et al
Argentina/PAIS-A0243/2020	EPI_ISL_792323	2020-05-14	Instituto de Investigaciones BiomÃ©dicas en Retrovirus y SIDA	Ãrea de SecuenciaciÃ³n del Laboratorio de VirologÃ­a del Hospital de NiÃ±os Dr. Ricardo Gutierrez on behalf of 'Proyecto Argentino Interinstitucional de genomica de SARS-CoV-2' (PAIS Consortium)	Nabaes Jodar et al
Argentina/PAIS-A0244/2020	EPI_ISL_792324	2020-04-25	Instituto de Investigaciones BiomÃ©dicas en Retrovirus y SIDA	Ãrea de SecuenciaciÃ³n del Laboratorio de VirologÃ­a del Hospital de NiÃ±os Dr. Ricardo Gutierrez on behalf of 'Proyecto Argentino Interinstitucional de genomica de SARS-CoV-2' (PAIS Consortium)	Nabaes Jodar et al
Argentina/PAIS-A0245/2020	EPI_ISL_792325	2020-04-25	Instituto de Investigaciones BiomÃ©dicas en Retrovirus y SIDA	Ãrea de SecuenciaciÃ³n del Laboratorio de VirologÃ­a del Hospital de NiÃ±os Dr. Ricardo Gutierrez on behalf of 'Proyecto Argentino Interinstitucional de genomica de SARS-CoV-2' (PAIS Consortium)	Nabaes Jodar et al
Argentina/PAIS-A0246/2020	EPI_ISL_792326	2020-04-13	Instituto de Investigaciones BiomÃ©dicas en Retrovirus y SIDA	Ãrea de SecuenciaciÃ³n del Laboratorio de VirologÃ­a del Hospital de NiÃ±os Dr. Ricardo Gutierrez on behalf of 'Proyecto Argentino Interinstitucional de genomica de SARS-CoV-2' (PAIS Consortium)	Nabaes Jodar et al
Argentina/PAIS-A0247/2020	EPI_ISL_792327	2020-04-13	Instituto de Investigaciones BiomÃ©dicas en Retrovirus y SIDA	Ãrea de SecuenciaciÃ³n del Laboratorio de VirologÃ­a del Hospital de NiÃ±os Dr. Ricardo Gutierrez on behalf of 'Proyecto Argentino Interinstitucional de genomica de SARS-CoV-2' (PAIS Consortium)	Nabaes Jodar et al
Argentina/PAIS-A0248/2020	EPI_ISL_792328	2020-04-13	Instituto de Investigaciones BiomÃ©dicas en Retrovirus y SIDA	Ãrea de SecuenciaciÃ³n del Laboratorio de VirologÃ­a del Hospital de NiÃ±os Dr. Ricardo Gutierrez on behalf of 'Proyecto Argentino Interinstitucional de genomica de SARS-CoV-2' (PAIS Consortium)	Nabaes Jodar et al
Argentina/PAIS-A0249/2020	EPI_ISL_792329	2020-04-15	Instituto de Investigaciones BiomÃ©dicas en Retrovirus y SIDA	Ãrea de SecuenciaciÃ³n del Laboratorio de VirologÃ­a del Hospital de NiÃ±os Dr. Ricardo Gutierrez on behalf of 'Proyecto Argentino Interinstitucional de genomica de SARS-CoV-2' (PAIS Consortium)	Nabaes Jodar et al
Argentina/PAIS-A0250/2020	EPI_ISL_792330	2020-04-20	Instituto de Investigaciones BiomÃ©dicas en Retrovirus y SIDA	Ãrea de SecuenciaciÃ³n del Laboratorio de VirologÃ­a del Hospital de NiÃ±os Dr. Ricardo Gutierrez on behalf of 'Proyecto Argentino Interinstitucional de genomica de SARS-CoV-2' (PAIS Consortium)	Nabaes Jodar et al
Argentina/PAIS-A0251/2020	EPI_ISL_792331	2020-04-23	Instituto de Investigaciones BiomÃ©dicas en Retrovirus y SIDA	Ãrea de SecuenciaciÃ³n del Laboratorio de VirologÃ­a del Hospital de NiÃ±os Dr. Ricardo Gutierrez on behalf of 'Proyecto Argentino Interinstitucional de genomica de SARS-CoV-2' (PAIS Consortium)	Nabaes Jodar et al
Argentina/PAIS-A0252/2020	EPI_ISL_792332	2020-05-01	Instituto de Investigaciones BiomÃ©dicas en Retrovirus y SIDA	Ãrea de SecuenciaciÃ³n del Laboratorio de VirologÃ­a del Hospital de NiÃ±os Dr. Ricardo Gutierrez on behalf of 'Proyecto Argentino Interinstitucional de genomica de SARS-CoV-2' (PAIS Consortium)	Nabaes Jodar et al
Argentina/PAIS-A0253/2020	EPI_ISL_792333	2020-04-13	Laboratorio del Hospital Interzonal General de Agudos Evita	Ãrea de SecuenciaciÃ³n del Laboratorio de VirologÃ­a del Hospital de NiÃ±os Dr. Ricardo Gutierrez on behalf of 'Proyecto Argentino Interinstitucional de genomica de SARS-CoV-2' (PAIS Consortium)	Nabaes Jodar et al
Argentina/PAIS-A0254/2020	EPI_ISL_792334	2020-04-24	Laboratorio del Hospital Interzonal General de Agudos Evita	Ãrea de SecuenciaciÃ³n del Laboratorio de VirologÃ­a del Hospital de NiÃ±os Dr. Ricardo Gutierrez on behalf of 'Proyecto Argentino Interinstitucional de genomica de SARS-CoV-2' (PAIS Consortium)	Nabaes Jodar et al
Argentina/PAIS-A0255/2020	EPI_ISL_792335	2020-04-25	Laboratorio del Hospital Interzonal General de Agudos Evita	Ãrea de SecuenciaciÃ³n del Laboratorio de VirologÃ­a del Hospital de NiÃ±os Dr. Ricardo Gutierrez on behalf of 'Proyecto Argentino Interinstitucional de genomica de SARS-CoV-2' (PAIS Consortium)	Nabaes Jodar et al
Argentina/PAIS-A0256/2020	EPI_ISL_792336	2020-04-27	Laboratorio del Hospital Interzonal General de Agudos Evita	Ãrea de SecuenciaciÃ³n del Laboratorio de VirologÃ­a del Hospital de NiÃ±os Dr. Ricardo Gutierrez on behalf of 'Proyecto Argentino Interinstitucional de genomica de SARS-CoV-2' (PAIS Consortium)	Nabaes Jodar et al
Argentina/PAIS-A0257/2020	EPI_ISL_792337	2020-04-27	Laboratorio del Hospital Interzonal General de Agudos Evita	Ãrea de SecuenciaciÃ³n del Laboratorio de VirologÃ­a del Hospital de NiÃ±os Dr. Ricardo Gutierrez on behalf of 'Proyecto Argentino Interinstitucional de genomica de SARS-CoV-2' (PAIS Consortium)	Nabaes Jodar et al
Argentina/PAIS-A0258/2020	EPI_ISL_792338	2020-04-27	Laboratorio del Hospital Interzonal General de Agudos Evita	Ãrea de SecuenciaciÃ³n del Laboratorio de VirologÃ­a del Hospital de NiÃ±os Dr. Ricardo Gutierrez on behalf of 'Proyecto Argentino Interinstitucional de genomica de SARS-CoV-2' (PAIS Consortium)	Nabaes Jodar et al
Argentina/PAIS-A0259/2020	EPI_ISL_792339	2020-04-28	Laboratorio del Hospital Interzonal General de Agudos Evita	Ãrea de SecuenciaciÃ³n del Laboratorio de VirologÃ­a del Hospital de NiÃ±os Dr. Ricardo Gutierrez on behalf of 'Proyecto Argentino Interinstitucional de genomica de SARS-CoV-2' (PAIS Consortium)	Nabaes Jodar et al
Argentina/PAIS-A0260/2020	EPI_ISL_792340	2020-04-28	Laboratorio del Hospital Interzonal General de Agudos Evita	Ãrea de SecuenciaciÃ³n del Laboratorio de VirologÃ­a del Hospital de NiÃ±os Dr. Ricardo Gutierrez on behalf of 'Proyecto Argentino Interinstitucional de genomica de SARS-CoV-2' (PAIS Consortium)	Nabaes Jodar et al
Argentina/PAIS-A0262/2020	EPI_ISL_792341	2020-05-01	Laboratorio del Hospital Interzonal General de Agudos Evita	Ãrea de SecuenciaciÃ³n del Laboratorio de VirologÃ­a del Hospital de NiÃ±os Dr. Ricardo Gutierrez on behalf of 'Proyecto Argentino Interinstitucional de genomica de SARS-CoV-2' (PAIS Consortium)	Nabaes Jodar et al
Argentina/PAIS-A0263/2020	EPI_ISL_792342	2020-05-02	Laboratorio del Hospital Interzonal General de Agudos Evita	Ãrea de SecuenciaciÃ³n del Laboratorio de VirologÃ­a del Hospital de NiÃ±os Dr. Ricardo Gutierrez on behalf of 'Proyecto Argentino Interinstitucional de genomica de SARS-CoV-2' (PAIS Consortium)	Nabaes Jodar et al
Argentina/PAIS-A0264/2020	EPI_ISL_792343	2020-04-16	Laboratorio del Hospital Interzonal General de Agudos Evita	Ãrea de SecuenciaciÃ³n del Laboratorio de VirologÃ­a del Hospital de NiÃ±os Dr. Ricardo Gutierrez on behalf of 'Proyecto Argentino Interinstitucional de genomica de SARS-CoV-2' (PAIS Consortium)	Nabaes Jodar et al
Argentina/PAIS-A0265/2020	EPI_ISL_792344	2020-05-06	Laboratorio del Hospital Interzonal General de Agudos Evita	Ãrea de SecuenciaciÃ³n del Laboratorio de VirologÃ­a del Hospital de NiÃ±os Dr. Ricardo Gutierrez on behalf of 'Proyecto Argentino Interinstitucional de genomica de SARS-CoV-2' (PAIS Consortium)	Nabaes Jodar et al
Argentina/PAIS-A0266/2020	EPI_ISL_792345	2020-04-17	Laboratorio del Hospital Interzonal General de Agudos Evita	Ãrea de SecuenciaciÃ³n del Laboratorio de VirologÃ­a del Hospital de NiÃ±os Dr. Ricardo Gutierrez on behalf of 'Proyecto Argentino Interinstitucional de genomica de SARS-CoV-2' (PAIS Consortium)	Nabaes Jodar et al
Argentina/PAIS-A0268/2020	EPI_ISL_792346	2020-04-18	Laboratorio del Hospital Interzonal General de Agudos Evita	Ãrea de SecuenciaciÃ³n del Laboratorio de VirologÃ­a del Hospital de NiÃ±os Dr. Ricardo Gutierrez on behalf of 'Proyecto Argentino Interinstitucional de genomica de SARS-CoV-2' (PAIS Consortium)	Nabaes Jodar et al
Argentina/PAIS-A0269/2020	EPI_ISL_792347	2020-04-20	Laboratorio del Hospital Interzonal General de Agudos Evita	Ãrea de SecuenciaciÃ³n del Laboratorio de VirologÃ­a del Hospital de NiÃ±os Dr. Ricardo Gutierrez on behalf of 'Proyecto Argentino Interinstitucional de genomica de SARS-CoV-2' (PAIS Consortium)	Nabaes Jodar et al
Argentina/PAIS-A0270/2020	EPI_ISL_792348	2020-04-18	Laboratorio del Hospital Interzonal General de Agudos Evita	Ãrea de SecuenciaciÃ³n del Laboratorio de VirologÃ­a del Hospital de NiÃ±os Dr. Ricardo Gutierrez on behalf of 'Proyecto Argentino Interinstitucional de genomica de SARS-CoV-2' (PAIS Consortium)	Nabaes Jodar et al
Argentina/PAIS-A0271/2020	EPI_ISL_792349	2020-04-21	Laboratorio del Hospital Interzonal General de Agudos Evita	Ãrea de SecuenciaciÃ³n del Laboratorio de VirologÃ­a del Hospital de NiÃ±os Dr. Ricardo Gutierrez on behalf of 'Proyecto Argentino Interinstitucional de genomica de SARS-CoV-2' (PAIS Consortium)	Nabaes Jodar et al
Argentina/PAIS-A0272/2020	EPI_ISL_792350	2020-04-22	Laboratorio del Hospital Interzonal General de Agudos Evita	Ãrea de SecuenciaciÃ³n del Laboratorio de VirologÃ­a del Hospital de NiÃ±os Dr. Ricardo Gutierrez on behalf of 'Proyecto Argentino Interinstitucional de genomica de SARS-CoV-2' (PAIS Consortium)	Nabaes Jodar et al
Argentina/PAIS-A0273/2020	EPI_ISL_792351	2020-05-26	Instituto Nacional de EpidemiologÃ­a Dr. Jara	Ãrea de SecuenciaciÃ³n del Laboratorio de VirologÃ­a del Hospital de NiÃ±os Dr. Ricardo Gutierrez on behalf of 'Proyecto Argentino Interinstitucional de genomica de SARS-CoV-2' (PAIS Consortium)	Nabaes Jodar et al
Argentina/PAIS-A0274/2020	EPI_ISL_792352	2020-05-28	Instituto Nacional de EpidemiologÃ­a Dr. Jara	Ãrea de SecuenciaciÃ³n del Laboratorio de VirologÃ­a del Hospital de NiÃ±os Dr. Ricardo Gutierrez on behalf of 'Proyecto Argentino Interinstitucional de genomica de SARS-CoV-2' (PAIS Consortium)	Nabaes Jodar et al
Argentina/PAIS-A0276/2020	EPI_ISL_792353	2020-05-29	Instituto Nacional de EpidemiologÃ­a Dr. Jara	Ãrea de SecuenciaciÃ³n del Laboratorio de VirologÃ­a del Hospital de NiÃ±os Dr. Ricardo Gutierrez on behalf of 'Proyecto Argentino Interinstitucional de genomica de SARS-CoV-2' (PAIS Consortium)	Nabaes Jodar et al
Argentina/PAIS-A0278/2020	EPI_ISL_792354	2020-06-07	Laboratorio de BiologÃ­a Molecular. Hospital Dr. HÃ©ctor Cura	Ãrea de SecuenciaciÃ³n del Laboratorio de VirologÃ­a del Hospital de NiÃ±os Dr. Ricardo Gutierrez on behalf of 'Proyecto Argentino Interinstitucional de genomica de SARS-CoV-2' (PAIS Consortium)	Nabaes Jodar et al
Argentina/PAIS-A0280/2020	EPI_ISL_792355	2020-06-12	Laboratorio de BiologÃ­a Molecular. Hospital Dr. HÃ©ctor Cura	Ãrea de SecuenciaciÃ³n del Laboratorio de VirologÃ­a del Hospital de NiÃ±os Dr. Ricardo Gutierrez on behalf of 'Proyecto Argentino Interinstitucional de genomica de SARS-CoV-2' (PAIS Consortium)	Nabaes Jodar et al
Argentina/PAIS-A0281/2020	EPI_ISL_792356	2020-06-10	Laboratorio de BiologÃ­a Molecular. Hospital Dr. HÃ©ctor Cura	Ãrea de SecuenciaciÃ³n del Laboratorio de VirologÃ­a del Hospital de NiÃ±os Dr. Ricardo Gutierrez on behalf of 'Proyecto Argentino Interinstitucional de genomica de SARS-CoV-2' (PAIS Consortium)	Nabaes Jodar et al
Argentina/PAIS-A0282/2020	EPI_ISL_792357	2020-06-02	Laboratorio de BiologÃ­a Molecular. Hospital Dr. HÃ©ctor Cura	Ãrea de SecuenciaciÃ³n del Laboratorio de VirologÃ­a del Hospital de NiÃ±os Dr. Ricardo Gutierrez on behalf of 'Proyecto Argentino Interinstitucional de genomica de SARS-CoV-2' (PAIS Consortium)	Nabaes Jodar et al
Argentina/PAIS-A0283/2020	EPI_ISL_792358	2020-03-28	Laboratorio de Virologia - HIEAyC San Juan de Dios	Ãrea de SecuenciaciÃ³n del Laboratorio de VirologÃ­a del Hospital de NiÃ±os Dr. Ricardo Gutierrez on behalf of 'Proyecto Argentino Interinstitucional de genomica de SARS-CoV-2' (PAIS Consortium)	Nabaes Jodar et al
Argentina/PAIS-A0284/2020	EPI_ISL_792359	2020-05-22	Laboratorio de Virologia - HIEAyC San Juan de Dios	Ãrea de SecuenciaciÃ³n del Laboratorio de VirologÃ­a del Hospital de NiÃ±os Dr. Ricardo Gutierrez on behalf of 'Proyecto Argentino Interinstitucional de genomica de SARS-CoV-2' (PAIS Consortium)	Nabaes Jodar et al
Argentina/PAIS-A0286/2020	EPI_ISL_792360	2020-05-26	Laboratorio de Virologia - HIEAyC San Juan de Dios	Ãrea de SecuenciaciÃ³n del Laboratorio de VirologÃ­a del Hospital de NiÃ±os Dr. Ricardo Gutierrez on behalf of 'Proyecto Argentino Interinstitucional de genomica de SARS-CoV-2' (PAIS Consortium)	Nabaes Jodar et al
Argentina/PAIS-A0287/2020	EPI_ISL_792361	2020-05-27	Laboratorio de Virologia - HIEAyC San Juan de Dios	Ãrea de SecuenciaciÃ³n del Laboratorio de VirologÃ­a del Hospital de NiÃ±os Dr. Ricardo Gutierrez on behalf of 'Proyecto Argentino Interinstitucional de genomica de SARS-CoV-2' (PAIS Consortium)	Nabaes Jodar et al
Argentina/PAIS-A0288/2020	EPI_ISL_792362	2020-05-29	Laboratorio de Virologia - HIEAyC San Juan de Dios	Ãrea de SecuenciaciÃ³n del Laboratorio de VirologÃ­a del Hospital de NiÃ±os Dr. Ricardo Gutierrez on behalf of 'Proyecto Argentino Interinstitucional de genomica de SARS-CoV-2' (PAIS Consortium)	Nabaes Jodar et al
Argentina/PAIS-A0289/2020	EPI_ISL_792363	2020-05-29	Laboratorio de Virologia - HIEAyC San Juan de Dios	Ãrea de SecuenciaciÃ³n del Laboratorio de VirologÃ­a del Hospital de NiÃ±os Dr. Ricardo Gutierrez on behalf of 'Proyecto Argentino Interinstitucional de genomica de SARS-CoV-2' (PAIS Consortium)	Nabaes Jodar et al
Argentina/PAIS-A0290/2020	EPI_ISL_792364	2020-03-31	Laboratorio de Virologia - HIEAyC San Juan de Dios	Ãrea de SecuenciaciÃ³n del Laboratorio de VirologÃ­a del Hospital de NiÃ±os Dr. Ricardo Gutierrez on behalf of 'Proyecto Argentino Interinstitucional de genomica de SARS-CoV-2' (PAIS Consortium)	Nabaes Jodar et al
Argentina/PAIS-A0291/2020	EPI_ISL_792365	2020-04-09	Laboratorio de Virologia - HIEAyC San Juan de Dios	Ãrea de SecuenciaciÃ³n del Laboratorio de VirologÃ­a del Hospital de NiÃ±os Dr. Ricardo Gutierrez on behalf of 'Proyecto Argentino Interinstitucional de genomica de SARS-CoV-2' (PAIS Consortium)	Nabaes Jodar et al
Argentina/PAIS-A0292/2020	EPI_ISL_792366	2020-04-12	Laboratorio de Virologia - HIEAyC San Juan de Dios	Ãrea de SecuenciaciÃ³n del Laboratorio de VirologÃ­a del Hospital de NiÃ±os Dr. Ricardo Gutierrez on behalf of 'Proyecto Argentino Interinstitucional de genomica de SARS-CoV-2' (PAIS Consortium)	Nabaes Jodar et al
Argentina/PAIS-A0293/2020	EPI_ISL_792367	2020-04-27	Laboratorio de Virologia - HIEAyC San Juan de Dios	Ãrea de SecuenciaciÃ³n del Laboratorio de VirologÃ­a del Hospital de NiÃ±os Dr. Ricardo Gutierrez on behalf of 'Proyecto Argentino Interinstitucional de genomica de SARS-CoV-2' (PAIS Consortium)	Nabaes Jodar et al
Argentina/PAIS-A0294/2020	EPI_ISL_792368	2020-04-24	Laboratorio de Virologia - HIEAyC San Juan de Dios	Ãrea de SecuenciaciÃ³n del Laboratorio de VirologÃ­a del Hospital de NiÃ±os Dr. Ricardo Gutierrez on behalf of 'Proyecto Argentino Interinstitucional de genomica de SARS-CoV-2' (PAIS Consortium)	Nabaes Jodar et al
Argentina/PAIS-A0295/2020	EPI_ISL_792369	2020-05-02	Laboratorio de Virologia - HIEAyC San Juan de Dios	Ãrea de SecuenciaciÃ³n del Laboratorio de VirologÃ­a del Hospital de NiÃ±os Dr. Ricardo Gutierrez on behalf of 'Proyecto Argentino Interinstitucional de genomica de SARS-CoV-2' (PAIS Consortium)	Nabaes Jodar et al
Argentina/PAIS-A0296/2020	EPI_ISL_792370	2020-05-19	Laboratorio de Virologia - HIEAyC San Juan de Dios	Ãrea de SecuenciaciÃ³n del Laboratorio de VirologÃ­a del Hospital de NiÃ±os Dr. Ricardo Gutierrez on behalf of 'Proyecto Argentino Interinstitucional de genomica de SARS-CoV-2' (PAIS Consortium)	Nabaes Jodar et al
Argentina/PAIS-A0297/2020	EPI_ISL_792371	2020-05-29	Laboratorio del Hospital Interzonal General de Agudos Eva PerÃ³n	Ãrea de SecuenciaciÃ³n del Laboratorio de VirologÃ­a del Hospital de NiÃ±os Dr. Ricardo Gutierrez on behalf of 'Proyecto Argentino Interinstitucional de genomica de SARS-CoV-2' (PAIS Consortium)	Nabaes Jodar et al
Argentina/PAIS-A0298/2020	EPI_ISL_792372	2020-05-29	Laboratorio del Hospital Interzonal General de Agudos Eva PerÃ³n	Ãrea de SecuenciaciÃ³n del Laboratorio de VirologÃ­a del Hospital de NiÃ±os Dr. Ricardo Gutierrez on behalf of 'Proyecto Argentino Interinstitucional de genomica de SARS-CoV-2' (PAIS Consortium)	Nabaes Jodar et al
Argentina/PAIS-A0300/2020	EPI_ISL_792373	2020-06-02	Laboratorio del Hospital Interzonal General de Agudos Eva PerÃ³n	Ãrea de SecuenciaciÃ³n del Laboratorio de VirologÃ­a del Hospital de NiÃ±os Dr. Ricardo Gutierrez on behalf of 'Proyecto Argentino Interinstitucional de genomica de SARS-CoV-2' (PAIS Consortium)	Nabaes Jodar et al
Argentina/PAIS-A0302/2020	EPI_ISL_792374	2020-05-22	Laboratorio del Hospital Interzonal General de Agudos Eva PerÃ³n	Ãrea de SecuenciaciÃ³n del Laboratorio de VirologÃ­a del Hospital de NiÃ±os Dr. Ricardo Gutierrez on behalf of 'Proyecto Argentino Interinstitucional de genomica de SARS-CoV-2' (PAIS Consortium)	Nabaes Jodar et al
Argentina/PAIS-A0304/2020	EPI_ISL_792375	2020-05-15	Laboratorio de salud pÃºblica, Facultad de Ciencias Exactas, Universidad Nacional de La Plata	Ãrea de SecuenciaciÃ³n del Laboratorio de VirologÃ­a del Hospital de NiÃ±os Dr. Ricardo Gutierrez on behalf of 'Proyecto Argentino Interinstitucional de genomica de SARS-CoV-2' (PAIS Consortium)	Nabaes Jodar et al
Argentina/PAIS-A0305/2020	EPI_ISL_792376	2020-05-25	Laboratorio de salud pÃºblica, Facultad de Ciencias Exactas, Universidad Nacional de La Plata	Ãrea de SecuenciaciÃ³n del Laboratorio de VirologÃ­a del Hospital de NiÃ±os Dr. Ricardo Gutierrez on behalf of 'Proyecto Argentino Interinstitucional de genomica de SARS-CoV-2' (PAIS Consortium)	Nabaes Jodar et al
Argentina/PAIS-A0306/2020	EPI_ISL_792377	2020-05-25	Laboratorio de salud pÃºblica, Facultad de Ciencias Exactas, Universidad Nacional de La Plata	Ãrea de SecuenciaciÃ³n del Laboratorio de VirologÃ­a del Hospital de NiÃ±os Dr. Ricardo Gutierrez on behalf of 'Proyecto Argentino Interinstitucional de genomica de SARS-CoV-2' (PAIS Consortium)	Nabaes Jodar et al
Argentina/PAIS-A0307/2020	EPI_ISL_792378	2020-05-25	Laboratorio de salud pÃºblica, Facultad de Ciencias Exactas, Universidad Nacional de La Plata	Ãrea de SecuenciaciÃ³n del Laboratorio de VirologÃ­a del Hospital de NiÃ±os Dr. Ricardo Gutierrez on behalf of 'Proyecto Argentino Interinstitucional de genomica de SARS-CoV-2' (PAIS Consortium)	Nabaes Jodar et al
Argentina/PAIS-A0308/2020	EPI_ISL_792379	2020-05-17	Laboratorio de salud pÃºblica, Facultad de Ciencias Exactas, Universidad Nacional de La Plata	Ãrea de SecuenciaciÃ³n del Laboratorio de VirologÃ­a del Hospital de NiÃ±os Dr. Ricardo Gutierrez on behalf of 'Proyecto Argentino Interinstitucional de genomica de SARS-CoV-2' (PAIS Consortium)	Nabaes Jodar et al
Argentina/PAIS-A0309/2020	EPI_ISL_792380	2020-05-18	Laboratorio de salud pÃºblica, Facultad de Ciencias Exactas, Universidad Nacional de La Plata	Ãrea de SecuenciaciÃ³n del Laboratorio de VirologÃ­a del Hospital de NiÃ±os Dr. Ricardo Gutierrez on behalf of 'Proyecto Argentino Interinstitucional de genomica de SARS-CoV-2' (PAIS Consortium)	Nabaes Jodar et al
Argentina/PAIS-A0310/2020	EPI_ISL_792381	2020-05-18	Laboratorio de salud pÃºblica, Facultad de Ciencias Exactas, Universidad Nacional de La Plata	Ãrea de SecuenciaciÃ³n del Laboratorio de VirologÃ­a del Hospital de NiÃ±os Dr. Ricardo Gutierrez on behalf of 'Proyecto Argentino Interinstitucional de genomica de SARS-CoV-2' (PAIS Consortium)	Nabaes Jodar et al
Argentina/PAIS-A0311/2020	EPI_ISL_792382	2020-05-19	Laboratorio de salud pÃºblica, Facultad de Ciencias Exactas, Universidad Nacional de La Plata	Ãrea de SecuenciaciÃ³n del Laboratorio de VirologÃ­a del Hospital de NiÃ±os Dr. Ricardo Gutierrez on behalf of 'Proyecto Argentino Interinstitucional de genomica de SARS-CoV-2' (PAIS Consortium)	Nabaes Jodar et al
Argentina/PAIS-A0313/2020	EPI_ISL_792383	2020-05-25	Laboratorio de salud pÃºblica, Facultad de Ciencias Exactas, Universidad Nacional de La Plata	Ãrea de SecuenciaciÃ³n del Laboratorio de VirologÃ­a del Hospital de NiÃ±os Dr. Ricardo Gutierrez on behalf of 'Proyecto Argentino Interinstitucional de genomica de SARS-CoV-2' (PAIS Consortium)	Nabaes Jodar et al
Argentina/PAIS-A0314/2020	EPI_ISL_792384	2020-05-25	Laboratorio de salud pÃºblica, Facultad de Ciencias Exactas, Universidad Nacional de La Plata	Ãrea de SecuenciaciÃ³n del Laboratorio de VirologÃ­a del Hospital de NiÃ±os Dr. Ricardo Gutierrez on behalf of 'Proyecto Argentino Interinstitucional de genomica de SARS-CoV-2' (PAIS Consortium)	Nabaes Jodar et al
Argentina/PAIS-A0315/2020	EPI_ISL_792385	2020-05-25	Laboratorio de salud pÃºblica, Facultad de Ciencias Exactas, Universidad Nacional de La Plata	Ãrea de SecuenciaciÃ³n del Laboratorio de VirologÃ­a del Hospital de NiÃ±os Dr. Ricardo Gutierrez on behalf of 'Proyecto Argentino Interinstitucional de genomica de SARS-CoV-2' (PAIS Consortium)	Nabaes Jodar et al
Argentina/PAIS-A0316/2020	EPI_ISL_792386	2020-04-27	Plataforma de Servicios BiotecnÃ³logicos: UTTIPP/PSB , Universidad Nacional de Quilmes.	Ãrea de SecuenciaciÃ³n del Laboratorio de VirologÃ­a del Hospital de NiÃ±os Dr. Ricardo Gutierrez on behalf of 'Proyecto Argentino Interinstitucional de genomica de SARS-CoV-2' (PAIS Consortium)	Nabaes Jodar et al
Argentina/PAIS-A0317/2020	EPI_ISL_792387	2020-05-19	Plataforma de Servicios BiotecnÃ³logicos: UTTIPP/PSB , Universidad Nacional de Quilmes.	Ãrea de SecuenciaciÃ³n del Laboratorio de VirologÃ­a del Hospital de NiÃ±os Dr. Ricardo Gutierrez on behalf of 'Proyecto Argentino Interinstitucional de genomica de SARS-CoV-2' (PAIS Consortium)	Nabaes Jodar et al
Argentina/PAIS-A0318/2020	EPI_ISL_792388	2020-05-19	Plataforma de Servicios BiotecnÃ³logicos: UTTIPP/PSB , Universidad Nacional de Quilmes.	Ãrea de SecuenciaciÃ³n del Laboratorio de VirologÃ­a del Hospital de NiÃ±os Dr. Ricardo Gutierrez on behalf of 'Proyecto Argentino Interinstitucional de genomica de SARS-CoV-2' (PAIS Consortium)	Nabaes Jodar et al
Argentina/PAIS-A0319/2020	EPI_ISL_792389	2020-04-28	Plataforma de Servicios BiotecnÃ³logicos: UTTIPP/PSB , Universidad Nacional de Quilmes.	Ãrea de SecuenciaciÃ³n del Laboratorio de VirologÃ­a del Hospital de NiÃ±os Dr. Ricardo Gutierrez on behalf of 'Proyecto Argentino Interinstitucional de genomica de SARS-CoV-2' (PAIS Consortium)	Nabaes Jodar et al
Argentina/PAIS-A0320/2020	EPI_ISL_792390	2020-04-27	Plataforma de Servicios BiotecnÃ³logicos: UTTIPP/PSB , Universidad Nacional de Quilmes.	Ãrea de SecuenciaciÃ³n del Laboratorio de VirologÃ­a del Hospital de NiÃ±os Dr. Ricardo Gutierrez on behalf of 'Proyecto Argentino Interinstitucional de genomica de SARS-CoV-2' (PAIS Consortium)	Nabaes Jodar et al
Argentina/PAIS-A0321/2020	EPI_ISL_792391	2020-04-29	Plataforma de Servicios BiotecnÃ³logicos: UTTIPP/PSB , Universidad Nacional de Quilmes.	Ãrea de SecuenciaciÃ³n del Laboratorio de VirologÃ­a del Hospital de NiÃ±os Dr. Ricardo Gutierrez on behalf of 'Proyecto Argentino Interinstitucional de genomica de SARS-CoV-2' (PAIS Consortium)	Nabaes Jodar et al
Argentina/PAIS-A0322/2020	EPI_ISL_792392	2020-05-05	Plataforma de Servicios BiotecnÃ³logicos: UTTIPP/PSB , Universidad Nacional de Quilmes.	Ãrea de SecuenciaciÃ³n del Laboratorio de VirologÃ­a del Hospital de NiÃ±os Dr. Ricardo Gutierrez on behalf of 'Proyecto Argentino Interinstitucional de genomica de SARS-CoV-2' (PAIS Consortium)	Nabaes Jodar et al
Argentina/PAIS-A0323/2020	EPI_ISL_792393	2020-05-07	Plataforma de Servicios BiotecnÃ³logicos: UTTIPP/PSB , Universidad Nacional de Quilmes.	Ãrea de SecuenciaciÃ³n del Laboratorio de VirologÃ­a del Hospital de NiÃ±os Dr. Ricardo Gutierrez on behalf of 'Proyecto Argentino Interinstitucional de genomica de SARS-CoV-2' (PAIS Consortium)	Nabaes Jodar et al
Argentina/PAIS-A0324/2020	EPI_ISL_792394	2020-05-11	Plataforma de Servicios BiotecnÃ³logicos: UTTIPP/PSB , Universidad Nacional de Quilmes.	Ãrea de SecuenciaciÃ³n del Laboratorio de VirologÃ­a del Hospital de NiÃ±os Dr. Ricardo Gutierrez on behalf of 'Proyecto Argentino Interinstitucional de genomica de SARS-CoV-2' (PAIS Consortium)	Nabaes Jodar et al
Argentina/PAIS-A0325/2020	EPI_ISL_792395	2020-05-15	Plataforma de Servicios BiotecnÃ³logicos: UTTIPP/PSB , Universidad Nacional de Quilmes.	Ãrea de SecuenciaciÃ³n del Laboratorio de VirologÃ­a del Hospital de NiÃ±os Dr. Ricardo Gutierrez on behalf of 'Proyecto Argentino Interinstitucional de genomica de SARS-CoV-2' (PAIS Consortium)	Nabaes Jodar et al
Argentina/PAIS-A0326/2020	EPI_ISL_792396	2020-05-19	Plataforma de Servicios BiotecnÃ³logicos: UTTIPP/PSB , Universidad Nacional de Quilmes.	Ãrea de SecuenciaciÃ³n del Laboratorio de VirologÃ­a del Hospital de NiÃ±os Dr. Ricardo Gutierrez on behalf of 'Proyecto Argentino Interinstitucional de genomica de SARS-CoV-2' (PAIS Consortium)	Nabaes Jodar et al
Argentina/PAIS-B0001/2020	EPI_ISL_792397	2020-05-28	Laboratorio de VirologÃ­a del Hospital de NiÃ±os Dr. Ricardo Gutierrez	BiocÃ³dices SA. on behalf of 'Proyecto Argentino Interinstitucional de genomica de SARS-CoV-2' (PAIS Consortium)	Gravis et al
Argentina/PAIS-B0002/2020	EPI_ISL_792398	2020-05-28	Laboratorio de VirologÃ­a del Hospital de NiÃ±os Dr. Ricardo Gutierrez	BiocÃ³dices SA. on behalf of 'Proyecto Argentino Interinstitucional de genomica de SARS-CoV-2' (PAIS Consortium)	Gravis et al
Argentina/PAIS-B0003/2020	EPI_ISL_792399	2020-05-30	Laboratorio de VirologÃ­a del Hospital de NiÃ±os Dr. Ricardo Gutierrez	BiocÃ³dices SA. on behalf of 'Proyecto Argentino Interinstitucional de genomica de SARS-CoV-2' (PAIS Consortium)	Gravis et al
Argentina/PAIS-B0004/2020	EPI_ISL_792400	2020-06-03	Laboratorio de VirologÃ­a del Hospital de NiÃ±os Dr. Ricardo Gutierrez	BiocÃ³dices SA. on behalf of 'Proyecto Argentino Interinstitucional de genomica de SARS-CoV-2' (PAIS Consortium)	Gravis et al
Argentina/PAIS-B0005/2020	EPI_ISL_792401	2020-06-05	Laboratorio de VirologÃ­a del Hospital de NiÃ±os Dr. Ricardo Gutierrez	BiocÃ³dices SA. on behalf of 'Proyecto Argentino Interinstitucional de genomica de SARS-CoV-2' (PAIS Consortium)	Gravis et al
Argentina/PAIS-C0001/2020	EPI_ISL_792402	2020-04-30	LABORATORIO DE CAMPAÃ‘A COVID 19 INTA	Instituto de BiotecnologÃ­a, IABIMO (CONICET), Instituto de VirologÃ­a, IVIT(CONICET), Instituto de PatobiologÃ­a, IPVET(CONICET), CICVyA, INTA on behalf of 'Proyecto Argentino Interinstitucional de genomica de SARS-CoV-2' (PAIS Consortium)	KÃ¶nig et al
Argentina/PAIS-C0002/2020	EPI_ISL_792403	2020-05-01	LABORATORIO DE CAMPAÃ‘A COVID 19 INTA	Instituto de BiotecnologÃ­a, IABIMO (CONICET), Instituto de VirologÃ­a, IVIT(CONICET), Instituto de PatobiologÃ­a, IPVET(CONICET), CICVyA, INTA on behalf of 'Proyecto Argentino Interinstitucional de genomica de SARS-CoV-2' (PAIS Consortium)	KÃ¶nig et al
Argentina/PAIS-C0003/2020	EPI_ISL_792404	2020-05-03	LABORATORIO DE CAMPAÃ‘A COVID 19 INTA	Instituto de BiotecnologÃ­a, IABIMO (CONICET), Instituto de VirologÃ­a, IVIT(CONICET), Instituto de PatobiologÃ­a, IPVET(CONICET), CICVyA, INTA on behalf of 'Proyecto Argentino Interinstitucional de genomica de SARS-CoV-2' (PAIS Consortium)	KÃ¶nig et al
Argentina/PAIS-C0004/2020	EPI_ISL_792405	2020-05-05	LABORATORIO DE CAMPAÃ‘A COVID 19 INTA	Instituto de BiotecnologÃ­a, IABIMO (CONICET), Instituto de VirologÃ­a, IVIT(CONICET), Instituto de PatobiologÃ­a, IPVET(CONICET), CICVyA, INTA on behalf of 'Proyecto Argentino Interinstitucional de genomica de SARS-CoV-2' (PAIS Consortium)	KÃ¶nig et al
Argentina/PAIS-C0005/2020	EPI_ISL_792406	2020-05-07	LABORATORIO DE CAMPAÃ‘A COVID 19 INTA	Instituto de BiotecnologÃ­a, IABIMO (CONICET), Instituto de VirologÃ­a, IVIT(CONICET), Instituto de PatobiologÃ­a, IPVET(CONICET), CICVyA, INTA on behalf of 'Proyecto Argentino Interinstitucional de genomica de SARS-CoV-2' (PAIS Consortium)	KÃ¶nig et al
Argentina/PAIS-C0006/2020	EPI_ISL_792407	2020-05-08	LABORATORIO DE CAMPAÃ‘A COVID 19 INTA	Instituto de BiotecnologÃ­a, IABIMO (CONICET), Instituto de VirologÃ­a, IVIT(CONICET), Instituto de PatobiologÃ­a, IPVET(CONICET), CICVyA, INTA on behalf of 'Proyecto Argentino Interinstitucional de genomica de SARS-CoV-2' (PAIS Consortium)	KÃ¶nig et al
Argentina/PAIS-C0007/2020	EPI_ISL_792408	2020-05-10	LABORATORIO DE CAMPAÃ‘A COVID 19 INTA	Instituto de BiotecnologÃ­a, IABIMO (CONICET), Instituto de VirologÃ­a, IVIT(CONICET), Instituto de PatobiologÃ­a, IPVET(CONICET), CICVyA, INTA on behalf of 'Proyecto Argentino Interinstitucional de genomica de SARS-CoV-2' (PAIS Consortium)	KÃ¶nig et al
Argentina/PAIS-C0008/2020	EPI_ISL_792409	2020-05-03	LABORATORIO DE CAMPAÃ‘A COVID 19 INTA	Instituto de BiotecnologÃ­a, IABIMO (CONICET), Instituto de VirologÃ­a, IVIT(CONICET), Instituto de PatobiologÃ­a, IPVET(CONICET), CICVyA, INTA on behalf of 'Proyecto Argentino Interinstitucional de genomica de SARS-CoV-2' (PAIS Consortium)	KÃ¶nig et al
Argentina/PAIS-C0009/2020	EPI_ISL_792410	2020-05-14	LABORATORIO DE CAMPAÃ‘A COVID 19 INTA	Instituto de BiotecnologÃ­a, IABIMO (CONICET), Instituto de VirologÃ­a, IVIT(CONICET), Instituto de PatobiologÃ­a, IPVET(CONICET), CICVyA, INTA on behalf of 'Proyecto Argentino Interinstitucional de genomica de SARS-CoV-2' (PAIS Consortium)	KÃ¶nig et al
Argentina/PAIS-C0010/2020	EPI_ISL_792411	2020-05-15	LABORATORIO DE CAMPAÃ‘A COVID 19 INTA	Instituto de BiotecnologÃ­a, IABIMO (CONICET), Instituto de VirologÃ­a, IVIT(CONICET), Instituto de PatobiologÃ­a, IPVET(CONICET), CICVyA, INTA on behalf of 'Proyecto Argentino Interinstitucional de genomica de SARS-CoV-2' (PAIS Consortium)	KÃ¶nig et al
Argentina/PAIS-C0011/2020	EPI_ISL_792412	2020-05-22	LABORATORIO DE CAMPAÃ‘A COVID 19 INTA	Instituto de BiotecnologÃ­a, IABIMO (CONICET), Instituto de VirologÃ­a, IVIT(CONICET), Instituto de PatobiologÃ­a, IPVET(CONICET), CICVyA, INTA on behalf of 'Proyecto Argentino Interinstitucional de genomica de SARS-CoV-2' (PAIS Consortium)	KÃ¶nig et al
Argentina/PAIS-C0012/2020	EPI_ISL_792413	2020-05-26	LABORATORIO DE CAMPAÃ‘A COVID 19 INTA	Instituto de BiotecnologÃ­a, IABIMO (CONICET), Instituto de VirologÃ­a, IVIT(CONICET), Instituto de PatobiologÃ­a, IPVET(CONICET), CICVyA, INTA on behalf of 'Proyecto Argentino Interinstitucional de genomica de SARS-CoV-2' (PAIS Consortium)	KÃ¶nig et al
Argentina/PAIS-C0013/2020	EPI_ISL_792414	2020-05-27	LABORATORIO DE CAMPAÃ‘A COVID 19 INTA	Instituto de BiotecnologÃ­a, IABIMO (CONICET), Instituto de VirologÃ­a, IVIT(CONICET), Instituto de PatobiologÃ­a, IPVET(CONICET), CICVyA, INTA on behalf of 'Proyecto Argentino Interinstitucional de genomica de SARS-CoV-2' (PAIS Consortium)	KÃ¶nig et al
Argentina/PAIS-C0014/2020	EPI_ISL_792415	2020-05-27	LABORATORIO DE CAMPAÃ‘A COVID 19 INTA	Instituto de BiotecnologÃ­a, IABIMO (CONICET), Instituto de VirologÃ­a, IVIT(CONICET), Instituto de PatobiologÃ­a, IPVET(CONICET), CICVyA, INTA on behalf of 'Proyecto Argentino Interinstitucional de genomica de SARS-CoV-2' (PAIS Consortium)	KÃ¶nig et al
Argentina/PAIS-C0015/2020	EPI_ISL_792416	2020-05-29	LABORATORIO DE CAMPAÃ‘A COVID 19 INTA	Instituto de BiotecnologÃ­a, IABIMO (CONICET), Instituto de VirologÃ­a, IVIT(CONICET), Instituto de PatobiologÃ­a, IPVET(CONICET), CICVyA, INTA on behalf of 'Proyecto Argentino Interinstitucional de genomica de SARS-CoV-2' (PAIS Consortium)	KÃ¶nig et al
Argentina/PAIS-C0016/2020	EPI_ISL_792417	2020-05-29	LABORATORIO DE CAMPAÃ‘A COVID 19 INTA	Instituto de BiotecnologÃ­a, IABIMO (CONICET), Instituto de VirologÃ­a, IVIT(CONICET), Instituto de PatobiologÃ­a, IPVET(CONICET), CICVyA, INTA on behalf of 'Proyecto Argentino Interinstitucional de genomica de SARS-CoV-2' (PAIS Consortium)	KÃ¶nig et al
Argentina/PAIS-C0017/2020	EPI_ISL_792418	2020-05-31	LABORATORIO DE CAMPAÃ‘A COVID 19 INTA	Instituto de BiotecnologÃ­a, IABIMO (CONICET), Instituto de VirologÃ­a, IVIT(CONICET), Instituto de PatobiologÃ­a, IPVET(CONICET), CICVyA, INTA on behalf of 'Proyecto Argentino Interinstitucional de genomica de SARS-CoV-2' (PAIS Consortium)	KÃ¶nig et al
Argentina/PAIS-C0018/2020	EPI_ISL_792419	2020-05-31	LABORATORIO DE CAMPAÃ‘A COVID 19 INTA	Instituto de BiotecnologÃ­a, IABIMO (CONICET), Instituto de VirologÃ­a, IVIT(CONICET), Instituto de PatobiologÃ­a, IPVET(CONICET), CICVyA, INTA on behalf of 'Proyecto Argentino Interinstitucional de genomica de SARS-CoV-2' (PAIS Consortium)	KÃ¶nig et al
Argentina/PAIS-C0019/2020	EPI_ISL_792420	2020-06-01	LABORATORIO DE CAMPAÃ‘A COVID 19 INTA	Instituto de BiotecnologÃ­a, IABIMO (CONICET), Instituto de VirologÃ­a, IVIT(CONICET), Instituto de PatobiologÃ­a, IPVET(CONICET), CICVyA, INTA on behalf of 'Proyecto Argentino Interinstitucional de genomica de SARS-CoV-2' (PAIS Consortium)	KÃ¶nig et al
Argentina/PAIS-C0020/2020	EPI_ISL_792421	2020-06-01	LABORATORIO DE CAMPAÃ‘A COVID 19 INTA	Instituto de BiotecnologÃ­a, IABIMO (CONICET), Instituto de VirologÃ­a, IVIT(CONICET), Instituto de PatobiologÃ­a, IPVET(CONICET), CICVyA, INTA on behalf of 'Proyecto Argentino Interinstitucional de genomica de SARS-CoV-2' (PAIS Consortium)	KÃ¶nig et al
Argentina/PAIS-C0021/2020	EPI_ISL_792422	2020-06-01	LABORATORIO DE CAMPAÃ‘A COVID 19 INTA	Instituto de BiotecnologÃ­a, IABIMO (CONICET), Instituto de VirologÃ­a, IVIT(CONICET), Instituto de PatobiologÃ­a, IPVET(CONICET), CICVyA, INTA on behalf of 'Proyecto Argentino Interinstitucional de genomica de SARS-CoV-2' (PAIS Consortium)	KÃ¶nig et al
Argentina/PAIS-C0022/2020	EPI_ISL_792423	2020-06-03	LABORATORIO DE CAMPAÃ‘A COVID 19 INTA	Instituto de BiotecnologÃ­a, IABIMO (CONICET), Instituto de VirologÃ­a, IVIT(CONICET), Instituto de PatobiologÃ­a, IPVET(CONICET), CICVyA, INTA on behalf of 'Proyecto Argentino Interinstitucional de genomica de SARS-CoV-2' (PAIS Consortium)	KÃ¶nig et al
Argentina/PAIS-C0023/2020	EPI_ISL_792424	2020-04-01	Laboratorio de InmunologÃ­a del Hospital Perrando e Instituto de Medicina Regional de la UNNE	Instituto de BiotecnologÃ­a, IABIMO (CONICET), Instituto de VirologÃ­a, IVIT(CONICET), Instituto de PatobiologÃ­a, IPVET(CONICET), CICVyA, INTA on behalf of 'Proyecto Argentino Interinstitucional de genomica de SARS-CoV-2' (PAIS Consortium)	KÃ¶nig et al
Argentina/PAIS-C0024/2020	EPI_ISL_792425	2020-05-01	Laboratorio de InmunologÃ­a del Hospital Perrando e Instituto de Medicina Regional de la UNNE	Instituto de BiotecnologÃ­a, IABIMO (CONICET), Instituto de VirologÃ­a, IVIT(CONICET), Instituto de PatobiologÃ­a, IPVET(CONICET), CICVyA, INTA on behalf of 'Proyecto Argentino Interinstitucional de genomica de SARS-CoV-2' (PAIS Consortium)	KÃ¶nig et al
Argentina/PAIS-C0025/2020	EPI_ISL_792426	2020-05-05	Laboratorio de InmunologÃ­a del Hospital Perrando e Instituto de Medicina Regional de la UNNE	Instituto de BiotecnologÃ­a, IABIMO (CONICET), Instituto de VirologÃ­a, IVIT(CONICET), Instituto de PatobiologÃ­a, IPVET(CONICET), CICVyA, INTA on behalf of 'Proyecto Argentino Interinstitucional de genomica de SARS-CoV-2' (PAIS Consortium)	KÃ¶nig et al
Argentina/PAIS-C0026/2020	EPI_ISL_792427	2020-05-07	Laboratorio de InmunologÃ­a del Hospital Perrando e Instituto de Medicina Regional de la UNNE	Instituto de BiotecnologÃ­a, IABIMO (CONICET), Instituto de VirologÃ­a, IVIT(CONICET), Instituto de PatobiologÃ­a, IPVET(CONICET), CICVyA, INTA on behalf of 'Proyecto Argentino Interinstitucional de genomica de SARS-CoV-2' (PAIS Consortium)	KÃ¶nig et al
Argentina/PAIS-C0027/2020	EPI_ISL_792428	2020-05-09	Laboratorio de InmunologÃ­a del Hospital Perrando e Instituto de Medicina Regional de la UNNE	Instituto de BiotecnologÃ­a, IABIMO (CONICET), Instituto de VirologÃ­a, IVIT(CONICET), Instituto de PatobiologÃ­a, IPVET(CONICET), CICVyA, INTA on behalf of 'Proyecto Argentino Interinstitucional de genomica de SARS-CoV-2' (PAIS Consortium)	KÃ¶nig et al
Argentina/PAIS-C0028/2020	EPI_ISL_792429	2020-05-14	Laboratorio de InmunologÃ­a del Hospital Perrando e Instituto de Medicina Regional de la UNNE	Instituto de BiotecnologÃ­a, IABIMO (CONICET), Instituto de VirologÃ­a, IVIT(CONICET), Instituto de PatobiologÃ­a, IPVET(CONICET), CICVyA, INTA on behalf of 'Proyecto Argentino Interinstitucional de genomica de SARS-CoV-2' (PAIS Consortium)	KÃ¶nig et al
Argentina/PAIS-C0029/2020	EPI_ISL_792430	2020-05-16	Laboratorio de InmunologÃ­a del Hospital Perrando e Instituto de Medicina Regional de la UNNE	Instituto de BiotecnologÃ­a, IABIMO (CONICET), Instituto de VirologÃ­a, IVIT(CONICET), Instituto de PatobiologÃ­a, IPVET(CONICET), CICVyA, INTA on behalf of 'Proyecto Argentino Interinstitucional de genomica de SARS-CoV-2' (PAIS Consortium)	KÃ¶nig et al
Argentina/PAIS-C0030/2020	EPI_ISL_792431	2020-05-18	Laboratorio de InmunologÃ­a del Hospital Perrando e Instituto de Medicina Regional de la UNNE	Instituto de BiotecnologÃ­a, IABIMO (CONICET), Instituto de VirologÃ­a, IVIT(CONICET), Instituto de PatobiologÃ­a, IPVET(CONICET), CICVyA, INTA on behalf of 'Proyecto Argentino Interinstitucional de genomica de SARS-CoV-2' (PAIS Consortium)	KÃ¶nig et al
Argentina/PAIS-C0031/2020	EPI_ISL_792432	2020-05-18	Laboratorio de InmunologÃ­a del Hospital Perrando e Instituto de Medicina Regional de la UNNE	Instituto de BiotecnologÃ­a, IABIMO (CONICET), Instituto de VirologÃ­a, IVIT(CONICET), Instituto de PatobiologÃ­a, IPVET(CONICET), CICVyA, INTA on behalf of 'Proyecto Argentino Interinstitucional de genomica de SARS-CoV-2' (PAIS Consortium)	KÃ¶nig et al
Argentina/PAIS-C0032/2020	EPI_ISL_792433	2020-05-19	Laboratorio de InmunologÃ­a del Hospital Perrando e Instituto de Medicina Regional de la UNNE	Instituto de BiotecnologÃ­a, IABIMO (CONICET), Instituto de VirologÃ­a, IVIT(CONICET), Instituto de PatobiologÃ­a, IPVET(CONICET), CICVyA, INTA on behalf of 'Proyecto Argentino Interinstitucional de genomica de SARS-CoV-2' (PAIS Consortium)	KÃ¶nig et al
Argentina/PAIS-C0033/2020	EPI_ISL_792434	2020-05-20	Laboratorio de InmunologÃ­a del Hospital Perrando e Instituto de Medicina Regional de la UNNE	Instituto de BiotecnologÃ­a, IABIMO (CONICET), Instituto de VirologÃ­a, IVIT(CONICET), Instituto de PatobiologÃ­a, IPVET(CONICET), CICVyA, INTA on behalf of 'Proyecto Argentino Interinstitucional de genomica de SARS-CoV-2' (PAIS Consortium)	KÃ¶nig et al
Argentina/PAIS-C0034/2020	EPI_ISL_792435	2020-05-21	Laboratorio de InmunologÃ­a del Hospital Perrando e Instituto de Medicina Regional de la UNNE	Instituto de BiotecnologÃ­a, IABIMO (CONICET), Instituto de VirologÃ­a, IVIT(CONICET), Instituto de PatobiologÃ­a, IPVET(CONICET), CICVyA, INTA on behalf of 'Proyecto Argentino Interinstitucional de genomica de SARS-CoV-2' (PAIS Consortium)	KÃ¶nig et al
Argentina/PAIS-C0035/2020	EPI_ISL_792436	2020-05-22	Laboratorio de InmunologÃ­a del Hospital Perrando e Instituto de Medicina Regional de la UNNE	Instituto de BiotecnologÃ­a, IABIMO (CONICET), Instituto de VirologÃ­a, IVIT(CONICET), Instituto de PatobiologÃ­a, IPVET(CONICET), CICVyA, INTA on behalf of 'Proyecto Argentino Interinstitucional de genomica de SARS-CoV-2' (PAIS Consortium)	KÃ¶nig et al
Argentina/PAIS-C0036/2020	EPI_ISL_792437	2020-05-22	Laboratorio de InmunologÃ­a del Hospital Perrando e Instituto de Medicina Regional de la UNNE	Instituto de BiotecnologÃ­a, IABIMO (CONICET), Instituto de VirologÃ­a, IVIT(CONICET), Instituto de PatobiologÃ­a, IPVET(CONICET), CICVyA, INTA on behalf of 'Proyecto Argentino Interinstitucional de genomica de SARS-CoV-2' (PAIS Consortium)	KÃ¶nig et al
Argentina/PAIS-C0037/2020	EPI_ISL_792438	2020-05-23	Laboratorio de InmunologÃ­a del Hospital Perrando e Instituto de Medicina Regional de la UNNE	Instituto de BiotecnologÃ­a, IABIMO (CONICET), Instituto de VirologÃ­a, IVIT(CONICET), Instituto de PatobiologÃ­a, IPVET(CONICET), CICVyA, INTA on behalf of 'Proyecto Argentino Interinstitucional de genomica de SARS-CoV-2' (PAIS Consortium)	KÃ¶nig et al
Argentina/PAIS-C0038/2020	EPI_ISL_792439	2020-05-25	Laboratorio de InmunologÃ­a del Hospital Perrando e Instituto de Medicina Regional de la UNNE	Instituto de BiotecnologÃ­a, IABIMO (CONICET), Instituto de VirologÃ­a, IVIT(CONICET), Instituto de PatobiologÃ­a, IPVET(CONICET), CICVyA, INTA on behalf of 'Proyecto Argentino Interinstitucional de genomica de SARS-CoV-2' (PAIS Consortium)	KÃ¶nig et al
Argentina/PAIS-C0039/2020	EPI_ISL_792440	2020-05-27	Laboratorio de InmunologÃ­a del Hospital Perrando e Instituto de Medicina Regional de la UNNE	Instituto de BiotecnologÃ­a, IABIMO (CONICET), Instituto de VirologÃ­a, IVIT(CONICET), Instituto de PatobiologÃ­a, IPVET(CONICET), CICVyA, INTA on behalf of 'Proyecto Argentino Interinstitucional de genomica de SARS-CoV-2' (PAIS Consortium)	KÃ¶nig et al
Argentina/PAIS-C0040/2020	EPI_ISL_792441	2020-06-13	Laboratorio de InmunologÃ­a del Hospital Perrando e Instituto de Medicina Regional de la UNNE	Instituto de BiotecnologÃ­a, IABIMO (CONICET), Instituto de VirologÃ­a, IVIT(CONICET), Instituto de PatobiologÃ­a, IPVET(CONICET), CICVyA, INTA on behalf of 'Proyecto Argentino Interinstitucional de genomica de SARS-CoV-2' (PAIS Consortium)	KÃ¶nig et al
Argentina/PAIS-C0041/2020	EPI_ISL_792442	2020-06-22	Laboratorio de InmunologÃ­a del Hospital Perrando e Instituto de Medicina Regional de la UNNE	Instituto de BiotecnologÃ­a, IABIMO (CONICET), Instituto de VirologÃ­a, IVIT(CONICET), Instituto de PatobiologÃ­a, IPVET(CONICET), CICVyA, INTA on behalf of 'Proyecto Argentino Interinstitucional de genomica de SARS-CoV-2' (PAIS Consortium)	KÃ¶nig et al
Argentina/PAIS-D0001/2020	EPI_ISL_792443	2020-04-07	Laboratorio del Hospital Regional Ushuaia Gdor. Ernesto Campos	Hospital Regional Ushuaia - Centro Austral De Investigaciones CientÃ­ficas - Universidad Nacional De Tierra Del Fuego on behalf of 'Proyecto Argentino Interinstitucional de genomica de SARS-CoV-2' (PAIS Consortium)	Ceballos et al
Argentina/PAIS-D0002/2020	EPI_ISL_792444	2020-04-27	Laboratorio del Hospital Regional Ushuaia Gdor. Ernesto Campos	Hospital Regional Ushuaia - Centro Austral De Investigaciones CientÃ­ficas - Universidad Nacional De Tierra Del Fuego on behalf of 'Proyecto Argentino Interinstitucional de genomica de SARS-CoV-2' (PAIS Consortium)	Ceballos et al
Argentina/PAIS-D0003/2020	EPI_ISL_792445	2020-03-21	Laboratorio del Hospital Regional Ushuaia Gdor. Ernesto Campos	Hospital Regional Ushuaia - Centro Austral De Investigaciones CientÃ­ficas - Universidad Nacional De Tierra Del Fuego on behalf of 'Proyecto Argentino Interinstitucional de genomica de SARS-CoV-2' (PAIS Consortium)	Ceballos et al
Argentina/PAIS-D0004/2020	EPI_ISL_792446	2020-04-30	Laboratorio del Hospital Regional Ushuaia Gdor. Ernesto Campos	Hospital Regional Ushuaia - Centro Austral De Investigaciones CientÃ­ficas - Universidad Nacional De Tierra Del Fuego on behalf of 'Proyecto Argentino Interinstitucional de genomica de SARS-CoV-2' (PAIS Consortium)	Ceballos et al
Argentina/PAIS-D0005/2020	EPI_ISL_792447	2020-03-24	Laboratorio del Hospital Regional Ushuaia Gdor. Ernesto Campos	Hospital Regional Ushuaia - Centro Austral De Investigaciones CientÃ­ficas - Universidad Nacional De Tierra Del Fuego on behalf of 'Proyecto Argentino Interinstitucional de genomica de SARS-CoV-2' (PAIS Consortium)	Ceballos et al
Argentina/PAIS-D0006/2020	EPI_ISL_792448	2020-04-23	Laboratorio del Hospital Regional Ushuaia Gdor. Ernesto Campos	Hospital Regional Ushuaia - Centro Austral De Investigaciones CientÃ­ficas - Universidad Nacional De Tierra Del Fuego on behalf of 'Proyecto Argentino Interinstitucional de genomica de SARS-CoV-2' (PAIS Consortium)	Ceballos et al
Argentina/PAIS-D0008/2020	EPI_ISL_792450	2020-05-02	Laboratorio del Hospital Regional Ushuaia Gdor. Ernesto Campos	Hospital Regional Ushuaia - Centro Austral De Investigaciones CientÃ­ficas - Universidad Nacional De Tierra Del Fuego on behalf of 'Proyecto Argentino Interinstitucional de genomica de SARS-CoV-2' (PAIS Consortium)	Ceballos et al
Argentina/PAIS-D0009/2020	EPI_ISL_792451	2020-03-24	Laboratorio del Hospital Regional Ushuaia Gdor. Ernesto Campos	Hospital Regional Ushuaia - Centro Austral De Investigaciones CientÃ­ficas - Universidad Nacional De Tierra Del Fuego on behalf of 'Proyecto Argentino Interinstitucional de genomica de SARS-CoV-2' (PAIS Consortium)	Ceballos et al
Argentina/PAIS-D0010/2020	EPI_ISL_792452	2020-03-10	Laboratorio del Hospital Regional Ushuaia Gdor. Ernesto Campos	Hospital Regional Ushuaia - Centro Austral De Investigaciones CientÃ­ficas - Universidad Nacional De Tierra Del Fuego on behalf of 'Proyecto Argentino Interinstitucional de genomica de SARS-CoV-2' (PAIS Consortium)	Ceballos et al
Argentina/PAIS-D0011/2020	EPI_ISL_792453	2020-03-29	Laboratorio del Hospital Regional Ushuaia Gdor. Ernesto Campos	Hospital Regional Ushuaia - Centro Austral De Investigaciones CientÃ­ficas - Universidad Nacional De Tierra Del Fuego on behalf of 'Proyecto Argentino Interinstitucional de genomica de SARS-CoV-2' (PAIS Consortium)	Ceballos et al
Argentina/PAIS-D0012/2020	EPI_ISL_792454	2020-03-29	Laboratorio del Hospital Regional Ushuaia Gdor. Ernesto Campos	Hospital Regional Ushuaia - Centro Austral De Investigaciones CientÃ­ficas - Universidad Nacional De Tierra Del Fuego on behalf of 'Proyecto Argentino Interinstitucional de genomica de SARS-CoV-2' (PAIS Consortium)	Ceballos et al
Argentina/PAIS-D0013/2020	EPI_ISL_792455	2020-04-01	Laboratorio del Hospital Regional Ushuaia Gdor. Ernesto Campos	Hospital Regional Ushuaia - Centro Austral De Investigaciones CientÃ­ficas - Universidad Nacional De Tierra Del Fuego on behalf of 'Proyecto Argentino Interinstitucional de genomica de SARS-CoV-2' (PAIS Consortium)	Ceballos et al
Argentina/PAIS-D0014/2020	EPI_ISL_792456	2020-04-09	Laboratorio del Hospital Regional Ushuaia Gdor. Ernesto Campos	Hospital Regional Ushuaia - Centro Austral De Investigaciones CientÃ­ficas - Universidad Nacional De Tierra Del Fuego on behalf of 'Proyecto Argentino Interinstitucional de genomica de SARS-CoV-2' (PAIS Consortium)	Ceballos et al
Argentina/PAIS-D0015/2020	EPI_ISL_792457	2020-04-30	Laboratorio del Hospital Regional Ushuaia Gdor. Ernesto Campos	Hospital Regional Ushuaia - Centro Austral De Investigaciones CientÃ­ficas - Universidad Nacional De Tierra Del Fuego on behalf of 'Proyecto Argentino Interinstitucional de genomica de SARS-CoV-2' (PAIS Consortium)	Ceballos et al
Argentina/PAIS-D0016/2020	EPI_ISL_792458	2020-03-16	Laboratorio del Hospital Regional Ushuaia Gdor. Ernesto Campos	Hospital Regional Ushuaia - Centro Austral De Investigaciones CientÃ­ficas - Universidad Nacional De Tierra Del Fuego on behalf of 'Proyecto Argentino Interinstitucional de genomica de SARS-CoV-2' (PAIS Consortium)	Ceballos et al
Argentina/PAIS-D0017/2020	EPI_ISL_792459	2020-03-23	Laboratorio del Hospital Regional Ushuaia Gdor. Ernesto Campos	Hospital Regional Ushuaia - Centro Austral De Investigaciones CientÃ­ficas - Universidad Nacional De Tierra Del Fuego on behalf of 'Proyecto Argentino Interinstitucional de genomica de SARS-CoV-2' (PAIS Consortium)	Ceballos et al
Argentina/PAIS-D0018/2020	EPI_ISL_792460	2020-03-30	Laboratorio del Hospital Regional Ushuaia Gdor. Ernesto Campos	Hospital Regional Ushuaia - Centro Austral De Investigaciones CientÃ­ficas - Universidad Nacional De Tierra Del Fuego on behalf of 'Proyecto Argentino Interinstitucional de genomica de SARS-CoV-2' (PAIS Consortium)	Ceballos et al
Argentina/PAIS-D0019/2020	EPI_ISL_792461	2020-04-15	Laboratorio del Hospital Regional Ushuaia Gdor. Ernesto Campos	Hospital Regional Ushuaia - Centro Austral De Investigaciones CientÃ­ficas - Universidad Nacional De Tierra Del Fuego on behalf of 'Proyecto Argentino Interinstitucional de genomica de SARS-CoV-2' (PAIS Consortium)	Ceballos et al
Argentina/PAIS-D0020/2020	EPI_ISL_792462	2020-03-28	Laboratorio del Hospital Regional Ushuaia Gdor. Ernesto Campos	Hospital Regional Ushuaia - Centro Austral De Investigaciones CientÃ­ficas - Universidad Nacional De Tierra Del Fuego on behalf of 'Proyecto Argentino Interinstitucional de genomica de SARS-CoV-2' (PAIS Consortium)	Ceballos et al
Argentina/PAIS-D0021/2020	EPI_ISL_792463	2020-03-23	Laboratorio del Hospital Regional Ushuaia Gdor. Ernesto Campos	Hospital Regional Ushuaia - Centro Austral De Investigaciones CientÃ­ficas - Universidad Nacional De Tierra Del Fuego on behalf of 'Proyecto Argentino Interinstitucional de genomica de SARS-CoV-2' (PAIS Consortium)	Ceballos et al
Argentina/PAIS-D0022/2020	EPI_ISL_792464	2020-03-30	Laboratorio del Hospital Regional Ushuaia Gdor. Ernesto Campos	Hospital Regional Ushuaia - Centro Austral De Investigaciones CientÃ­ficas - Universidad Nacional De Tierra Del Fuego on behalf of 'Proyecto Argentino Interinstitucional de genomica de SARS-CoV-2' (PAIS Consortium)	Ceballos et al
Argentina/PAIS-D0023/2020	EPI_ISL_792465	2020-04-17	Laboratorio del Hospital Regional Ushuaia Gdor. Ernesto Campos	Hospital Regional Ushuaia - Centro Austral De Investigaciones CientÃ­ficas - Universidad Nacional De Tierra Del Fuego on behalf of 'Proyecto Argentino Interinstitucional de genomica de SARS-CoV-2' (PAIS Consortium)	Ceballos et al
Argentina/PAIS-D0024/2020	EPI_ISL_792466	2020-04-26	Laboratorio del Hospital Regional Ushuaia Gdor. Ernesto Campos	Hospital Regional Ushuaia - Centro Austral De Investigaciones CientÃ­ficas - Universidad Nacional De Tierra Del Fuego on behalf of 'Proyecto Argentino Interinstitucional de genomica de SARS-CoV-2' (PAIS Consortium)	Ceballos et al
Argentina/PAIS-D0025/2020	EPI_ISL_792467	2020-03-26	Laboratorio del Hospital Regional Ushuaia Gdor. Ernesto Campos	Hospital Regional Ushuaia - Centro Austral De Investigaciones CientÃ­ficas - Universidad Nacional De Tierra Del Fuego on behalf of 'Proyecto Argentino Interinstitucional de genomica de SARS-CoV-2' (PAIS Consortium)	Ceballos et al
Argentina/PAIS-D0026/2020	EPI_ISL_792468	2020-04-01	Laboratorio del Hospital Regional Ushuaia Gdor. Ernesto Campos	Hospital Regional Ushuaia - Centro Austral De Investigaciones CientÃ­ficas - Universidad Nacional De Tierra Del Fuego on behalf of 'Proyecto Argentino Interinstitucional de genomica de SARS-CoV-2' (PAIS Consortium)	Ceballos et al
Argentina/PAIS-D0027/2020	EPI_ISL_792469	2020-04-01	Laboratorio del Hospital Regional Ushuaia Gdor. Ernesto Campos	Hospital Regional Ushuaia - Centro Austral De Investigaciones CientÃ­ficas - Universidad Nacional De Tierra Del Fuego on behalf of 'Proyecto Argentino Interinstitucional de genomica de SARS-CoV-2' (PAIS Consortium)	Ceballos et al
Argentina/PAIS-D0028/2020	EPI_ISL_792470	2020-05-26	Laboratorio del Hospital Regional Ushuaia Gdor. Ernesto Campos	Hospital Regional Ushuaia - Centro Austral De Investigaciones CientÃ­ficas - Universidad Nacional De Tierra Del Fuego on behalf of 'Proyecto Argentino Interinstitucional de genomica de SARS-CoV-2' (PAIS Consortium)	Ceballos et al
Argentina/PAIS-D0029/2020	EPI_ISL_792471	2020-03-30	Laboratorio del Hospital Regional Ushuaia Gdor. Ernesto Campos	Hospital Regional Ushuaia - Centro Austral De Investigaciones CientÃ­ficas - Universidad Nacional De Tierra Del Fuego on behalf of 'Proyecto Argentino Interinstitucional de genomica de SARS-CoV-2' (PAIS Consortium)	Ceballos et al
Argentina/PAIS-D0030/2020	EPI_ISL_792472	2020-04-16	Laboratorio del Hospital Regional Ushuaia Gdor. Ernesto Campos	Hospital Regional Ushuaia - Centro Austral De Investigaciones CientÃ­ficas - Universidad Nacional De Tierra Del Fuego on behalf of 'Proyecto Argentino Interinstitucional de genomica de SARS-CoV-2' (PAIS Consortium)	Ceballos et al
Argentina/PAIS-D0031/2020	EPI_ISL_792473	2020-04-01	Laboratorio del Hospital Regional Ushuaia Gdor. Ernesto Campos	Hospital Regional Ushuaia - Centro Austral De Investigaciones CientÃ­ficas - Universidad Nacional De Tierra Del Fuego on behalf of 'Proyecto Argentino Interinstitucional de genomica de SARS-CoV-2' (PAIS Consortium)	Ceballos et al
Argentina/PAIS-D0032/2020	EPI_ISL_792474	2020-03-19	Laboratorio Central Mg. Luis Alfredo Pianciola	Hospital Regional Ushuaia - Centro Austral De Investigaciones CientÃ­ficas - Universidad Nacional De Tierra Del Fuego on behalf of 'Proyecto Argentino Interinstitucional de genomica de SARS-CoV-2' (PAIS Consortium)	Ceballos et al
Argentina/PAIS-D0033/2020	EPI_ISL_792475	2020-03-21	Laboratorio Central Mg. Luis Alfredo Pianciola	Hospital Regional Ushuaia - Centro Austral De Investigaciones CientÃ­ficas - Universidad Nacional De Tierra Del Fuego on behalf of 'Proyecto Argentino Interinstitucional de genomica de SARS-CoV-2' (PAIS Consortium)	Ceballos et al
Argentina/PAIS-D0034/2020	EPI_ISL_792476	2020-03-23	Laboratorio Central Mg. Luis Alfredo Pianciola	Hospital Regional Ushuaia - Centro Austral De Investigaciones CientÃ­ficas - Universidad Nacional De Tierra Del Fuego on behalf of 'Proyecto Argentino Interinstitucional de genomica de SARS-CoV-2' (PAIS Consortium)	Ceballos et al
Argentina/PAIS-D0035/2020	EPI_ISL_792477	2020-03-25	Laboratorio Central Mg. Luis Alfredo Pianciola	Hospital Regional Ushuaia - Centro Austral De Investigaciones CientÃ­ficas - Universidad Nacional De Tierra Del Fuego on behalf of 'Proyecto Argentino Interinstitucional de genomica de SARS-CoV-2' (PAIS Consortium)	Ceballos et al
Argentina/PAIS-D0036/2020	EPI_ISL_792478	2020-03-23	Laboratorio Central Mg. Luis Alfredo Pianciola	Hospital Regional Ushuaia - Centro Austral De Investigaciones CientÃ­ficas - Universidad Nacional De Tierra Del Fuego on behalf of 'Proyecto Argentino Interinstitucional de genomica de SARS-CoV-2' (PAIS Consortium)	Ceballos et al
Argentina/PAIS-D0037/2020	EPI_ISL_792479	2020-03-26	Laboratorio Central Mg. Luis Alfredo Pianciola	Hospital Regional Ushuaia - Centro Austral De Investigaciones CientÃ­ficas - Universidad Nacional De Tierra Del Fuego on behalf of 'Proyecto Argentino Interinstitucional de genomica de SARS-CoV-2' (PAIS Consortium)	Ceballos et al
Argentina/PAIS-D0038/2020	EPI_ISL_792480	2020-03-25	Laboratorio Central Mg. Luis Alfredo Pianciola	Hospital Regional Ushuaia - Centro Austral De Investigaciones CientÃ­ficas - Universidad Nacional De Tierra Del Fuego on behalf of 'Proyecto Argentino Interinstitucional de genomica de SARS-CoV-2' (PAIS Consortium)	Ceballos et al
Argentina/PAIS-D0039/2020	EPI_ISL_792481	2020-03-28	Laboratorio Central Mg. Luis Alfredo Pianciola	Hospital Regional Ushuaia - Centro Austral De Investigaciones CientÃ­ficas - Universidad Nacional De Tierra Del Fuego on behalf of 'Proyecto Argentino Interinstitucional de genomica de SARS-CoV-2' (PAIS Consortium)	Ceballos et al
Argentina/PAIS-D0040/2020	EPI_ISL_792482	2020-03-27	Laboratorio Central Mg. Luis Alfredo Pianciola	Hospital Regional Ushuaia - Centro Austral De Investigaciones CientÃ­ficas - Universidad Nacional De Tierra Del Fuego on behalf of 'Proyecto Argentino Interinstitucional de genomica de SARS-CoV-2' (PAIS Consortium)	Ceballos et al
Argentina/PAIS-D0041/2020	EPI_ISL_792483	2020-04-03	Laboratorio Central Mg. Luis Alfredo Pianciola	Hospital Regional Ushuaia - Centro Austral De Investigaciones CientÃ­ficas - Universidad Nacional De Tierra Del Fuego on behalf of 'Proyecto Argentino Interinstitucional de genomica de SARS-CoV-2' (PAIS Consortium)	Ceballos et al
Argentina/PAIS-D0042/2020	EPI_ISL_792484	2020-03-30	Laboratorio Central Mg. Luis Alfredo Pianciola	Hospital Regional Ushuaia - Centro Austral De Investigaciones CientÃ­ficas - Universidad Nacional De Tierra Del Fuego on behalf of 'Proyecto Argentino Interinstitucional de genomica de SARS-CoV-2' (PAIS Consortium)	Ceballos et al
Argentina/PAIS-D0043/2020	EPI_ISL_792485	2020-04-01	Laboratorio Central Mg. Luis Alfredo Pianciola	Hospital Regional Ushuaia - Centro Austral De Investigaciones CientÃ­ficas - Universidad Nacional De Tierra Del Fuego on behalf of 'Proyecto Argentino Interinstitucional de genomica de SARS-CoV-2' (PAIS Consortium)	Ceballos et al
Argentina/PAIS-D0044/2020	EPI_ISL_792486	2020-04-01	Laboratorio Central Mg. Luis Alfredo Pianciola	Hospital Regional Ushuaia - Centro Austral De Investigaciones CientÃ­ficas - Universidad Nacional De Tierra Del Fuego on behalf of 'Proyecto Argentino Interinstitucional de genomica de SARS-CoV-2' (PAIS Consortium)	Ceballos et al
Argentina/PAIS-D0045/2020	EPI_ISL_792487	2020-04-05	Laboratorio Central Mg. Luis Alfredo Pianciola	Hospital Regional Ushuaia - Centro Austral De Investigaciones CientÃ­ficas - Universidad Nacional De Tierra Del Fuego on behalf of 'Proyecto Argentino Interinstitucional de genomica de SARS-CoV-2' (PAIS Consortium)	Ceballos et al
Argentina/PAIS-D0046/2020	EPI_ISL_792488	2020-04-03	Laboratorio Central Mg. Luis Alfredo Pianciola	Hospital Regional Ushuaia - Centro Austral De Investigaciones CientÃ­ficas - Universidad Nacional De Tierra Del Fuego on behalf of 'Proyecto Argentino Interinstitucional de genomica de SARS-CoV-2' (PAIS Consortium)	Ceballos et al
Argentina/PAIS-D0047/2020	EPI_ISL_792489	2020-04-05	Laboratorio Central Mg. Luis Alfredo Pianciola	Hospital Regional Ushuaia - Centro Austral De Investigaciones CientÃ­ficas - Universidad Nacional De Tierra Del Fuego on behalf of 'Proyecto Argentino Interinstitucional de genomica de SARS-CoV-2' (PAIS Consortium)	Ceballos et al
Argentina/PAIS-D0048/2020	EPI_ISL_792490	2020-04-03	Laboratorio Central Mg. Luis Alfredo Pianciola	Hospital Regional Ushuaia - Centro Austral De Investigaciones CientÃ­ficas - Universidad Nacional De Tierra Del Fuego on behalf of 'Proyecto Argentino Interinstitucional de genomica de SARS-CoV-2' (PAIS Consortium)	Ceballos et al
Argentina/PAIS-D0049/2020	EPI_ISL_792491	2020-04-07	Laboratorio Central Mg. Luis Alfredo Pianciola	Hospital Regional Ushuaia - Centro Austral De Investigaciones CientÃ­ficas - Universidad Nacional De Tierra Del Fuego on behalf of 'Proyecto Argentino Interinstitucional de genomica de SARS-CoV-2' (PAIS Consortium)	Ceballos et al
Argentina/PAIS-D0050/2020	EPI_ISL_792492	2020-04-06	Laboratorio Central Mg. Luis Alfredo Pianciola	Hospital Regional Ushuaia - Centro Austral De Investigaciones CientÃ­ficas - Universidad Nacional De Tierra Del Fuego on behalf of 'Proyecto Argentino Interinstitucional de genomica de SARS-CoV-2' (PAIS Consortium)	Ceballos et al
Argentina/PAIS-D0051/2020	EPI_ISL_792493	2020-04-07	Laboratorio Central Mg. Luis Alfredo Pianciola	Hospital Regional Ushuaia - Centro Austral De Investigaciones CientÃ­ficas - Universidad Nacional De Tierra Del Fuego on behalf of 'Proyecto Argentino Interinstitucional de genomica de SARS-CoV-2' (PAIS Consortium)	Ceballos et al
Argentina/PAIS-D0052/2020	EPI_ISL_792494	2020-04-10	Laboratorio Central Mg. Luis Alfredo Pianciola	Hospital Regional Ushuaia - Centro Austral De Investigaciones CientÃ­ficas - Universidad Nacional De Tierra Del Fuego on behalf of 'Proyecto Argentino Interinstitucional de genomica de SARS-CoV-2' (PAIS Consortium)	Ceballos et al
Argentina/PAIS-D0053/2020	EPI_ISL_792495	2020-04-19	Laboratorio Central Mg. Luis Alfredo Pianciola	Hospital Regional Ushuaia - Centro Austral De Investigaciones CientÃ­ficas - Universidad Nacional De Tierra Del Fuego on behalf of 'Proyecto Argentino Interinstitucional de genomica de SARS-CoV-2' (PAIS Consortium)	Ceballos et al
Argentina/PAIS-D0054/2020	EPI_ISL_792496	2020-04-20	Laboratorio Central Mg. Luis Alfredo Pianciola	Hospital Regional Ushuaia - Centro Austral De Investigaciones CientÃ­ficas - Universidad Nacional De Tierra Del Fuego on behalf of 'Proyecto Argentino Interinstitucional de genomica de SARS-CoV-2' (PAIS Consortium)	Ceballos et al
Argentina/PAIS-D0055/2020	EPI_ISL_792497	2020-04-15	Laboratorio Central Mg. Luis Alfredo Pianciola	Hospital Regional Ushuaia - Centro Austral De Investigaciones CientÃ­ficas - Universidad Nacional De Tierra Del Fuego on behalf of 'Proyecto Argentino Interinstitucional de genomica de SARS-CoV-2' (PAIS Consortium)	Ceballos et al
Argentina/PAIS-D0056/2020	EPI_ISL_792498	2020-04-28	Laboratorio Central Mg. Luis Alfredo Pianciola	Hospital Regional Ushuaia - Centro Austral De Investigaciones CientÃ­ficas - Universidad Nacional De Tierra Del Fuego on behalf of 'Proyecto Argentino Interinstitucional de genomica de SARS-CoV-2' (PAIS Consortium)	Ceballos et al
Argentina/PAIS-D0059/2020	EPI_ISL_792499	2020-04-20	Laboratorio Central Mg. Luis Alfredo Pianciola	Hospital Regional Ushuaia - Centro Austral De Investigaciones CientÃ­ficas - Universidad Nacional De Tierra Del Fuego on behalf of 'Proyecto Argentino Interinstitucional de genomica de SARS-CoV-2' (PAIS Consortium)	Ceballos et al
Argentina/PAIS-E0001/2020	EPI_ISL_792500	2020-04-06	Laboratorio de InmunologÃ­a del Hospital Perrando e Instituto de Medicina Regional de la UNNE	Grupo de GenÃ³mica y BioinformÃ¡tica del Instituto de InvestigaciÃ³n de la Cadena LÃ¡ctea CONICET-INTA on behalf of 'Proyecto Argentino Interinstitucional de genomica de SARS-CoV-2' (PAIS Consortium)	Eberhardt et al
Argentina/PAIS-E0002/2020	EPI_ISL_792501	2020-04-10	Laboratorio de InmunologÃ­a del Hospital Perrando e Instituto de Medicina Regional de la UNNE	Grupo de GenÃ³mica y BioinformÃ¡tica del Instituto de InvestigaciÃ³n de la Cadena LÃ¡ctea CONICET-INTA on behalf of 'Proyecto Argentino Interinstitucional de genomica de SARS-CoV-2' (PAIS Consortium)	Eberhardt et al
Argentina/PAIS-E0003/2020	EPI_ISL_792502	2020-04-11	Laboratorio de InmunologÃ­a del Hospital Perrando e Instituto de Medicina Regional de la UNNE	Grupo de GenÃ³mica y BioinformÃ¡tica del Instituto de InvestigaciÃ³n de la Cadena LÃ¡ctea CONICET-INTA on behalf of 'Proyecto Argentino Interinstitucional de genomica de SARS-CoV-2' (PAIS Consortium)	Eberhardt et al
Argentina/PAIS-E0004/2020	EPI_ISL_792503	2020-04-11	Laboratorio de InmunologÃ­a del Hospital Perrando e Instituto de Medicina Regional de la UNNE	Grupo de GenÃ³mica y BioinformÃ¡tica del Instituto de InvestigaciÃ³n de la Cadena LÃ¡ctea CONICET-INTA on behalf of 'Proyecto Argentino Interinstitucional de genomica de SARS-CoV-2' (PAIS Consortium)	Eberhardt et al
Argentina/PAIS-E0005/2020	EPI_ISL_792504	2020-04-16	Laboratorio de InmunologÃ­a del Hospital Perrando e Instituto de Medicina Regional de la UNNE	Grupo de GenÃ³mica y BioinformÃ¡tica del Instituto de InvestigaciÃ³n de la Cadena LÃ¡ctea CONICET-INTA on behalf of 'Proyecto Argentino Interinstitucional de genomica de SARS-CoV-2' (PAIS Consortium)	Eberhardt et al
Argentina/PAIS-E0006/2020	EPI_ISL_792505	2020-04-17	Laboratorio de InmunologÃ­a del Hospital Perrando e Instituto de Medicina Regional de la UNNE	Grupo de GenÃ³mica y BioinformÃ¡tica del Instituto de InvestigaciÃ³n de la Cadena LÃ¡ctea CONICET-INTA on behalf of 'Proyecto Argentino Interinstitucional de genomica de SARS-CoV-2' (PAIS Consortium)	Eberhardt et al
Argentina/PAIS-E0008/2020	EPI_ISL_792506	2020-04-18	Laboratorio de InmunologÃ­a del Hospital Perrando e Instituto de Medicina Regional de la UNNE	Grupo de GenÃ³mica y BioinformÃ¡tica del Instituto de InvestigaciÃ³n de la Cadena LÃ¡ctea CONICET-INTA on behalf of 'Proyecto Argentino Interinstitucional de genomica de SARS-CoV-2' (PAIS Consortium)	Eberhardt et al
Argentina/PAIS-E0009/2020	EPI_ISL_792507	2020-04-23	Laboratorio de InmunologÃ­a del Hospital Perrando e Instituto de Medicina Regional de la UNNE	Grupo de GenÃ³mica y BioinformÃ¡tica del Instituto de InvestigaciÃ³n de la Cadena LÃ¡ctea CONICET-INTA on behalf of 'Proyecto Argentino Interinstitucional de genomica de SARS-CoV-2' (PAIS Consortium)	Eberhardt et al
Argentina/PAIS-E0010/2020	EPI_ISL_792508	2020-04-23	Laboratorio de InmunologÃ­a del Hospital Perrando e Instituto de Medicina Regional de la UNNE	Grupo de GenÃ³mica y BioinformÃ¡tica del Instituto de InvestigaciÃ³n de la Cadena LÃ¡ctea CONICET-INTA on behalf of 'Proyecto Argentino Interinstitucional de genomica de SARS-CoV-2' (PAIS Consortium)	Eberhardt et al
Argentina/PAIS-E0011/2020	EPI_ISL_792509	2020-04-24	Laboratorio de InmunologÃ­a del Hospital Perrando e Instituto de Medicina Regional de la UNNE	Grupo de GenÃ³mica y BioinformÃ¡tica del Instituto de InvestigaciÃ³n de la Cadena LÃ¡ctea CONICET-INTA on behalf of 'Proyecto Argentino Interinstitucional de genomica de SARS-CoV-2' (PAIS Consortium)	Eberhardt et al
Argentina/PAIS-E0012/2020	EPI_ISL_792510	2020-04-30	Laboratorio de InmunologÃ­a del Hospital Perrando e Instituto de Medicina Regional de la UNNE	Grupo de GenÃ³mica y BioinformÃ¡tica del Instituto de InvestigaciÃ³n de la Cadena LÃ¡ctea CONICET-INTA on behalf of 'Proyecto Argentino Interinstitucional de genomica de SARS-CoV-2' (PAIS Consortium)	Eberhardt et al
Argentina/PAIS-E0014/2020	EPI_ISL_792511	2020-04-17	Laboratorio de InmunologÃ­a del Hospital Perrando e Instituto de Medicina Regional de la UNNE	Grupo de GenÃ³mica y BioinformÃ¡tica del Instituto de InvestigaciÃ³n de la Cadena LÃ¡ctea CONICET-INTA on behalf of 'Proyecto Argentino Interinstitucional de genomica de SARS-CoV-2' (PAIS Consortium)	Eberhardt et al
Argentina/PAIS-E0015/2020	EPI_ISL_792512	2020-03-23	Laboratorio Central de la Ciudad de Santa Fe	Grupo de GenÃ³mica y BioinformÃ¡tica del Instituto de InvestigaciÃ³n de la Cadena LÃ¡ctea CONICET-INTA on behalf of 'Proyecto Argentino Interinstitucional de genomica de SARS-CoV-2' (PAIS Consortium)	Eberhardt et al
Argentina/PAIS-E0019/2020	EPI_ISL_792513	2020-06-23	Laboratorio Central de la Ciudad de Santa Fe	Grupo de GenÃ³mica y BioinformÃ¡tica del Instituto de InvestigaciÃ³n de la Cadena LÃ¡ctea CONICET-INTA on behalf of 'Proyecto Argentino Interinstitucional de genomica de SARS-CoV-2' (PAIS Consortium)	Eberhardt et al
Argentina/PAIS-E0022/2020	EPI_ISL_792514	2020-05-29	Laboratorio Central de la Ciudad de Santa Fe	Grupo de GenÃ³mica y BioinformÃ¡tica del Instituto de InvestigaciÃ³n de la Cadena LÃ¡ctea CONICET-INTA on behalf of 'Proyecto Argentino Interinstitucional de genomica de SARS-CoV-2' (PAIS Consortium)	Eberhardt et al
Argentina/PAIS-E0023/2020	EPI_ISL_792515	2020-06-10	Laboratorio Central de la Ciudad de Santa Fe	Grupo de GenÃ³mica y BioinformÃ¡tica del Instituto de InvestigaciÃ³n de la Cadena LÃ¡ctea CONICET-INTA on behalf of 'Proyecto Argentino Interinstitucional de genomica de SARS-CoV-2' (PAIS Consortium)	Eberhardt et al
Argentina/PAIS-E0025/2020	EPI_ISL_792516	2020-06-17	Laboratorio Central de la Ciudad de Santa Fe	Grupo de GenÃ³mica y BioinformÃ¡tica del Instituto de InvestigaciÃ³n de la Cadena LÃ¡ctea CONICET-INTA on behalf of 'Proyecto Argentino Interinstitucional de genomica de SARS-CoV-2' (PAIS Consortium)	Eberhardt et al
Argentina/PAIS-E0026/2020	EPI_ISL_792517	2020-06-26	Laboratorio Central de la Ciudad de Santa Fe	Grupo de GenÃ³mica y BioinformÃ¡tica del Instituto de InvestigaciÃ³n de la Cadena LÃ¡ctea CONICET-INTA on behalf of 'Proyecto Argentino Interinstitucional de genomica de SARS-CoV-2' (PAIS Consortium)	Eberhardt et al
Argentina/PAIS-E0027/2020	EPI_ISL_792518	2020-06-27	Laboratorio Central de la Ciudad de Santa Fe	Grupo de GenÃ³mica y BioinformÃ¡tica del Instituto de InvestigaciÃ³n de la Cadena LÃ¡ctea CONICET-INTA on behalf of 'Proyecto Argentino Interinstitucional de genomica de SARS-CoV-2' (PAIS Consortium)	Eberhardt et al
Argentina/PAIS-E0029/2020	EPI_ISL_792519	2020-06-27	Laboratorio Central de la Ciudad de Santa Fe	Grupo de GenÃ³mica y BioinformÃ¡tica del Instituto de InvestigaciÃ³n de la Cadena LÃ¡ctea CONICET-INTA on behalf of 'Proyecto Argentino Interinstitucional de genomica de SARS-CoV-2' (PAIS Consortium)	Eberhardt et al
Argentina/PAIS-E0032/2020	EPI_ISL_792520	2020-06-03	Laboratorio Central de la Ciudad de Santa Fe	Grupo de GenÃ³mica y BioinformÃ¡tica del Instituto de InvestigaciÃ³n de la Cadena LÃ¡ctea CONICET-INTA on behalf of 'Proyecto Argentino Interinstitucional de genomica de SARS-CoV-2' (PAIS Consortium)	Eberhardt et al
Argentina/PAIS-E0033/2020	EPI_ISL_792521	2020-06-04	Laboratorio Central de la Ciudad de Santa Fe	Grupo de GenÃ³mica y BioinformÃ¡tica del Instituto de InvestigaciÃ³n de la Cadena LÃ¡ctea CONICET-INTA on behalf of 'Proyecto Argentino Interinstitucional de genomica de SARS-CoV-2' (PAIS Consortium)	Eberhardt et al
Argentina/PAIS-E0100/2020	EPI_ISL_792522	2020-12-14	Laboratorio de VirologÃ­a del Hospital de NiÃ±os Dr. Ricardo Gutierrez	Grupo de GenÃ³mica y BioinformÃ¡tica del Instituto de InvestigaciÃ³n de la Cadena LÃ¡ctea CONICET-INTA on behalf of 'Proyecto Argentino Interinstitucional de genomica de SARS-CoV-2' (PAIS Consortium)	Amadio et al
Argentina/PAIS-E0101/2020	EPI_ISL_792523	2020-12-16	Laboratorio de VirologÃ­a del Hospital de NiÃ±os Dr. Ricardo Gutierrez	Grupo de GenÃ³mica y BioinformÃ¡tica del Instituto de InvestigaciÃ³n de la Cadena LÃ¡ctea CONICET-INTA on behalf of 'Proyecto Argentino Interinstitucional de genomica de SARS-CoV-2' (PAIS Consortium)	Amadio et al
Argentina/PAIS-E0102/2020	EPI_ISL_792524	2020-12-17	Laboratorio de VirologÃ­a del Hospital de NiÃ±os Dr. Ricardo Gutierrez	Grupo de GenÃ³mica y BioinformÃ¡tica del Instituto de InvestigaciÃ³n de la Cadena LÃ¡ctea CONICET-INTA on behalf of 'Proyecto Argentino Interinstitucional de genomica de SARS-CoV-2' (PAIS Consortium)	Amadio et al
Argentina/PAIS-E0103/2020	EPI_ISL_792525	2020-12-22	Laboratorio del Hospital Interzonal General de Agudos Evita	Grupo de GenÃ³mica y BioinformÃ¡tica del Instituto de InvestigaciÃ³n de la Cadena LÃ¡ctea CONICET-INTA on behalf of 'Proyecto Argentino Interinstitucional de genomica de SARS-CoV-2' (PAIS Consortium)	Amadio et al
Argentina/PAIS-E0126/2020	EPI_ISL_842652	2020-12-21	Laboratorio de BiologÃ­a Molecular Hospital Pedro de Elizalde	Grupo de GenÃ³mica y BioinformÃ¡tica del Instituto de InvestigaciÃ³n de la Cadena LÃ¡ctea CONICET-INTA on behalf of 'Proyecto Argentino Interinstitucional de genomica de SARS-CoV-2' (PAIS Consortium)	Amadio et al
Argentina/PAIS-G0001/2020	EPI_ISL_499083	2020-04-15	Instituto de Virologia "Dr. J. M. Vanella", Facultad de Ciencias Medicas, Universidad Nacional de Cordoba. Laboratorio Central de la Provincia de Cordoba, Argentina. Ministerio de Salud de la provincia de Cordoba, Argentina.	Laboratorio de VirologÃ­a, Hospital de NiÃ±os Ricardo GutiÃ©rrez, CABA, Argentina.	Sandra Gallego et al
Argentina/PAIS-G0002/2020	EPI_ISL_792526	2020-03-22	Laboratorio Central, Ministerio de Salud CÃ³rdoba	Instituto de Patologia Vegetal (CIAP-INTA) on behalf of 'Proyecto Argentino Interinstitucional de genomica de SARS-CoV-2' (PAIS Consortium)	FernÃ¡ndez et al
Argentina/PAIS-G0003/2020	EPI_ISL_792527	2020-03-23	Laboratorio Central, Ministerio de Salud CÃ³rdoba	Instituto de Patologia Vegetal (CIAP-INTA) on behalf of 'Proyecto Argentino Interinstitucional de genomica de SARS-CoV-2' (PAIS Consortium)	FernÃ¡ndez et al
Argentina/PAIS-G0004/2020	EPI_ISL_792528	2020-03-31	Laboratorio Central, Ministerio de Salud CÃ³rdoba	Instituto de Patologia Vegetal (CIAP-INTA) on behalf of 'Proyecto Argentino Interinstitucional de genomica de SARS-CoV-2' (PAIS Consortium)	FernÃ¡ndez et al
Argentina/PAIS-G0005/2020	EPI_ISL_792529	2020-04-05	Laboratorio Central, Ministerio de Salud CÃ³rdoba	Instituto de Patologia Vegetal (CIAP-INTA) on behalf of 'Proyecto Argentino Interinstitucional de genomica de SARS-CoV-2' (PAIS Consortium)	FernÃ¡ndez et al
Argentina/PAIS-G0006/2020	EPI_ISL_792530	2020-04-09	Laboratorio Central, Ministerio de Salud CÃ³rdoba	Instituto de Patologia Vegetal (CIAP-INTA) on behalf of 'Proyecto Argentino Interinstitucional de genomica de SARS-CoV-2' (PAIS Consortium)	FernÃ¡ndez et al
Argentina/PAIS-G0007/2020	EPI_ISL_792531	2020-03-23	Laboratorio Central, Ministerio de Salud CÃ³rdoba	Instituto de Patologia Vegetal (CIAP-INTA) on behalf of 'Proyecto Argentino Interinstitucional de genomica de SARS-CoV-2' (PAIS Consortium)	FernÃ¡ndez et al
Argentina/PAIS-G0008/2020	EPI_ISL_792532	2020-03-29	Laboratorio Central, Ministerio de Salud CÃ³rdoba	Instituto de Patologia Vegetal (CIAP-INTA) on behalf of 'Proyecto Argentino Interinstitucional de genomica de SARS-CoV-2' (PAIS Consortium)	FernÃ¡ndez et al
Argentina/PAIS-G0009/2020	EPI_ISL_792533	2020-04-01	Laboratorio Central, Ministerio de Salud CÃ³rdoba	Instituto de Patologia Vegetal (CIAP-INTA) on behalf of 'Proyecto Argentino Interinstitucional de genomica de SARS-CoV-2' (PAIS Consortium)	FernÃ¡ndez et al
Argentina/PAIS-G0010/2020	EPI_ISL_792534	2020-04-05	Laboratorio Central, Ministerio de Salud CÃ³rdoba	Instituto de Patologia Vegetal (CIAP-INTA) on behalf of 'Proyecto Argentino Interinstitucional de genomica de SARS-CoV-2' (PAIS Consortium)	FernÃ¡ndez et al
Argentina/PAIS-G0011/2020	EPI_ISL_792535	2020-03-30	Laboratorio Central, Ministerio de Salud CÃ³rdoba	Instituto de Patologia Vegetal (CIAP-INTA) on behalf of 'Proyecto Argentino Interinstitucional de genomica de SARS-CoV-2' (PAIS Consortium)	FernÃ¡ndez et al
Argentina/PAIS-G0012/2020	EPI_ISL_792536	2020-04-05	Laboratorio Central, Ministerio de Salud CÃ³rdoba	Instituto de Patologia Vegetal (CIAP-INTA) on behalf of 'Proyecto Argentino Interinstitucional de genomica de SARS-CoV-2' (PAIS Consortium)	FernÃ¡ndez et al
Argentina/PAIS-G0013/2020	EPI_ISL_792537	2020-03-31	Laboratorio Central, Ministerio de Salud CÃ³rdoba	Instituto de Patologia Vegetal (CIAP-INTA) on behalf of 'Proyecto Argentino Interinstitucional de genomica de SARS-CoV-2' (PAIS Consortium)	FernÃ¡ndez et al
Argentina/PAIS-G0014/2020	EPI_ISL_792538	2020-04-02	Laboratorio Central, Ministerio de Salud CÃ³rdoba	Instituto de Patologia Vegetal (CIAP-INTA) on behalf of 'Proyecto Argentino Interinstitucional de genomica de SARS-CoV-2' (PAIS Consortium)	FernÃ¡ndez et al
Argentina/PAIS-G0015/2020	EPI_ISL_792539	2020-03-26	Laboratorio Central, Ministerio de Salud CÃ³rdoba	Instituto de Patologia Vegetal (CIAP-INTA) on behalf of 'Proyecto Argentino Interinstitucional de genomica de SARS-CoV-2' (PAIS Consortium)	FernÃ¡ndez et al
Argentina/PAIS-G0016/2020	EPI_ISL_792540	2020-03-26	Laboratorio Central, Ministerio de Salud CÃ³rdoba	Instituto de Patologia Vegetal (CIAP-INTA) on behalf of 'Proyecto Argentino Interinstitucional de genomica de SARS-CoV-2' (PAIS Consortium)	FernÃ¡ndez et al
Argentina/PAIS-G0017/2020	EPI_ISL_792541	2020-04-10	Laboratorio Central, Ministerio de Salud CÃ³rdoba	Instituto de Patologia Vegetal (CIAP-INTA) on behalf of 'Proyecto Argentino Interinstitucional de genomica de SARS-CoV-2' (PAIS Consortium)	FernÃ¡ndez et al
Argentina/PAIS-G0018/2020	EPI_ISL_792542	2020-04-10	Laboratorio Central, Ministerio de Salud CÃ³rdoba	Instituto de Patologia Vegetal (CIAP-INTA) on behalf of 'Proyecto Argentino Interinstitucional de genomica de SARS-CoV-2' (PAIS Consortium)	FernÃ¡ndez et al
Argentina/PAIS-G0019/2020	EPI_ISL_792543	2020-04-10	Laboratorio Central, Ministerio de Salud CÃ³rdoba	Instituto de Patologia Vegetal (CIAP-INTA) on behalf of 'Proyecto Argentino Interinstitucional de genomica de SARS-CoV-2' (PAIS Consortium)	FernÃ¡ndez et al
Argentina/PAIS-G0020/2020	EPI_ISL_792544	2020-07-06	Laboratorio Central, Ministerio de Salud CÃ³rdoba	Instituto de Patologia Vegetal (CIAP-INTA) on behalf of 'Proyecto Argentino Interinstitucional de genomica de SARS-CoV-2' (PAIS Consortium)	FernÃ¡ndez et al
Argentina/PAIS-G0021/2020	EPI_ISL_792545	2020-07-06	Laboratorio Central, Ministerio de Salud CÃ³rdoba	Instituto de Patologia Vegetal (CIAP-INTA) on behalf of 'Proyecto Argentino Interinstitucional de genomica de SARS-CoV-2' (PAIS Consortium)	FernÃ¡ndez et al
Argentina/PAIS-G0022/2020	EPI_ISL_792546	2020-07-06	Laboratorio Central, Ministerio de Salud CÃ³rdoba	Instituto de Patologia Vegetal (CIAP-INTA) on behalf of 'Proyecto Argentino Interinstitucional de genomica de SARS-CoV-2' (PAIS Consortium)	FernÃ¡ndez et al
Argentina/argenTAG-1252C02E/2020	EPI_ISL_648677	2020-07-22	INBIRS-UBA	Laboratorio Mixto de BiotecnologÃ­a AcuÃ¡tica (LMBA)	JoaquÃ­n Ezpeleta et al
Argentina/argenTAG-12568054/2020	EPI_ISL_648213	2020-07-22	INBIRS-UBA	Laboratorio Mixto de BiotecnologÃ­a AcuÃ¡tica (LMBA)	JoaquÃ­n Ezpeleta et al
Argentina/argenTAG-126BE00A/2020	EPI_ISL_648217	2020-07-20	SILAB	Laboratorio Mixto de BiotecnologÃ­a AcuÃ¡tica (LMBA)	JoaquÃ­n Ezpeleta et al
Argentina/argenTAG-127F2009/2020	EPI_ISL_648215	2020-07-22	INBIRS-UBA	Laboratorio Mixto de BiotecnologÃ­a AcuÃ¡tica (LMBA)	JoaquÃ­n Ezpeleta et al
Argentina/argenTAG-1283F02A/2020	EPI_ISL_648211	2020-07-22	INBIRS-UBA	Laboratorio Mixto de BiotecnologÃ­a AcuÃ¡tica (LMBA)	JoaquÃ­n Ezpeleta et al
Argentina/argenTAG-12926008/2020	EPI_ISL_648216	2020-07-22	INBIRS-UBA	Laboratorio Mixto de BiotecnologÃ­a AcuÃ¡tica (LMBA)	JoaquÃ­n Ezpeleta et al
Argentina/argenTAG-12BBC055/2020	EPI_ISL_648210	2020-07-22	INBIRS-UBA	Laboratorio Mixto de BiotecnologÃ­a AcuÃ¡tica (LMBA)	JoaquÃ­n Ezpeleta et al
Argentina/argenTAG-12C0A026/2020	EPI_ISL_648209	2020-07-22	INBIRS-UBA	Laboratorio Mixto de BiotecnologÃ­a AcuÃ¡tica (LMBA)	JoaquÃ­n Ezpeleta et al
Argentina/argenTAG-12CB103F/2020	EPI_ISL_648218	2020-07-22	INBIRS-UBA	Laboratorio Mixto de BiotecnologÃ­a AcuÃ¡tica (LMBA)	JoaquÃ­n Ezpeleta et al
Argentina/argenTAG-12CF5045/2020	EPI_ISL_648212	2020-07-22	INBIRS-UBA	Laboratorio Mixto de BiotecnologÃ­a AcuÃ¡tica (LMBA)	JoaquÃ­n Ezpeleta et al
Argentina/argenTAG-12E7E043/2020	EPI_ISL_648214	2020-07-22	INBIRS-UBA	Laboratorio Mixto de BiotecnologÃ­a AcuÃ¡tica (LMBA)	JoaquÃ­n Ezpeleta et al
Armenia/ChVir8659/2020	EPI_ISL_683449	2020	National Center of Disease Control and Prevention of the Republic of Armenia	Charite Universitatsmedizin Berlin, Institute of Virology	Victor M Corman et al
Armenia/ChVir8660/2020	EPI_ISL_683450	2020	National Center of Disease Control and Prevention of the Republic of Armenia	CharitÃ© UniversitÃ¤tsmedizin Berlin, Institute of Virology	Victor M Corman et al
Armenia/ChVir8668/2020	EPI_ISL_683451	2020	National Center of Disease Control and Prevention of the Republic of Armenia	CharitÃ© UniversitÃ¤tsmedizin Berlin, Institute of Virology	Victor M Corman et al
Armenia/IMB1-1/2021	EPI_ISL_1139146	2021-01-19	National Center of Disease Control and Prevention of the Republic of Armenia	Institute of Molecular Biology NAS RA, Republic of Armenia, Department of Bioengineering, BioinformaticsInstitute and Molecular Biology IBMPh RAU, Republic of Armenia	Zaven Karalyan et al
Armenia/IMB1-10/2021	EPI_ISL_1139155	2021-01-19	National Center of Disease Control and Prevention of the Republic of Armenia	Institute of Molecular Biology NAS RA, Republic of Armenia, Department of Bioengineering, BioinformaticsInstitute and Molecular Biology IBMPh RAU, Republic of Armenia	Arsen Arakelyan et al
Armenia/IMB1-11/2021	EPI_ISL_1139156	2021-01-19	National Center of Disease Control and Prevention of the Republic of Armenia	Institute of Molecular Biology NAS RA, Republic of Armenia, Department of Bioengineering, BioinformaticsInstitute and Molecular Biology IBMPh RAU, Republic of Armenia	Arsen Arakelyan et al
Armenia/IMB1-12/2021	EPI_ISL_1139157	2021-01-19	National Center of Disease Control and Prevention of the Republic of Armenia	Institute of Molecular Biology NAS RA, Republic of Armenia, Department of Bioengineering, BioinformaticsInstitute and Molecular Biology IBMPh RAU, Republic of Armenia	Arsen Arakelyan et al
Armenia/IMB1-2/2021	EPI_ISL_1139147	2021-01-19	National Center of Disease Control and Prevention of the Republic of Armenia	Institute of Molecular Biology NAS RA, Republic of Armenia, Department of Bioengineering, BioinformaticsInstitute and Molecular Biology IBMPh RAU, Republic of Armenia	Zaven Karalyan et al
Armenia/IMB1-3/2021	EPI_ISL_1139148	2021-01-19	National Center of Disease Control and Prevention of the Republic of Armenia	Institute of Molecular Biology NAS RA, Republic of Armenia, Department of Bioengineering, BioinformaticsInstitute and Molecular Biology IBMPh RAU, Republic of Armenia	Arsen Arakelyan et al
Armenia/IMB1-4/2021	EPI_ISL_1139149	2021-01-19	National Center of Disease Control and Prevention of the Republic of Armenia	Institute of Molecular Biology NAS RA, Republic of Armenia, Department of Bioengineering, BioinformaticsInstitute and Molecular Biology IBMPh RAU, Republic of Armenia	Arsen Arakelyan et al
Armenia/IMB1-5/2021	EPI_ISL_1139150	2021-01-19	National Center of Disease Control and Prevention of the Republic of Armenia	Institute of Molecular Biology NAS RA, Republic of Armenia, Department of Bioengineering, BioinformaticsInstitute and Molecular Biology IBMPh RAU, Republic of Armenia	Arsen Arakelyan et al
Armenia/IMB1-6/2021	EPI_ISL_1139151	2021-01-19	National Center of Disease Control and Prevention of the Republic of Armenia	Institute of Molecular Biology NAS RA, Republic of Armenia, Department of Bioengineering, BioinformaticsInstitute and Molecular Biology IBMPh RAU, Republic of Armenia	Arsen Arakelyan et al
Armenia/IMB1-7/2021	EPI_ISL_1139152	2021-01-19	National Center of Disease Control and Prevention of the Republic of Armenia	Institute of Molecular Biology NAS RA, Republic of Armenia, Department of Bioengineering, BioinformaticsInstitute and Molecular Biology IBMPh RAU, Republic of Armenia	Arsen Arakelyan et al
Armenia/IMB1-8/2021	EPI_ISL_1139153	2021-01-19	National Center of Disease Control and Prevention of the Republic of Armenia	Institute of Molecular Biology NAS RA, Republic of Armenia, Department of Bioengineering, BioinformaticsInstitute and Molecular Biology IBMPh RAU, Republic of Armenia	Arsen Arakelyan et al
Armenia/IMB1-9/2021	EPI_ISL_1139154	2021-01-19	National Center of Disease Control and Prevention of the Republic of Armenia	Institute of Molecular Biology NAS RA, Republic of Armenia, Department of Bioengineering, BioinformaticsInstitute and Molecular Biology IBMPh RAU, Republic of Armenia	Arsen Arakelyan et al
Aruba/AW-RIVM-10101/2020	EPI_ISL_547445	2020-03-13	Dutch COVID-19 response team	National Institute for Public Health and the Environment (RIVM)	Adam Meijer et al
Aruba/AW-RIVM-10113/2020	EPI_ISL_547446	2020-03-17	Dutch COVID-19 response team	National Institute for Public Health and the Environment (RIVM)	Adam Meijer et al
Aruba/AW-RIVM-10114/2020	EPI_ISL_547447	2020-03-18	Dutch COVID-19 response team	National Institute for Public Health and the Environment (RIVM)	Adam Meijer et al
Aruba/AW-RIVM-10115/2020	EPI_ISL_547448	2020-03-20	Dutch COVID-19 response team	National Institute for Public Health and the Environment (RIVM)	Adam Meijer et al
Aruba/AW-RIVM-10122/2020	EPI_ISL_547449	2020-03-22	Dutch COVID-19 response team	National Institute for Public Health and the Environment (RIVM)	Adam Meijer et al
Aruba/AW-RIVM-10326/2020	EPI_ISL_636513	2020-03-20	Dutch COVID-19 response team	National Institute for Public Health and the Environment (RIVM)	Adam Meijer et al
Aruba/AW-RIVM-10388/2020	EPI_ISL_636514	2020-08-04	Dutch COVID-19 response team	National Institute for Public Health and the Environment (RIVM)	Adam Meijer et al
Aruba/AW-RIVM-10389/2020	EPI_ISL_636515	2020-08-05	Dutch COVID-19 response team	National Institute for Public Health and the Environment (RIVM)	Adam Meijer et al
Aruba/AW-RIVM-10390/2020	EPI_ISL_636516	2020-08-06	Dutch COVID-19 response team	National Institute for Public Health and the Environment (RIVM)	Adam Meijer et al
Aruba/AW-RIVM-10391/2020	EPI_ISL_636517	2020-08-07	Dutch COVID-19 response team	National Institute for Public Health and the Environment (RIVM)	Adam Meijer et al
Aruba/AW-RIVM-10392/2020	EPI_ISL_636518	2020-08-25	Dutch COVID-19 response team	National Institute for Public Health and the Environment (RIVM)	Adam Meijer et al
Aruba/AW-RIVM-10520/2021	EPI_ISL_905239	2021-01-13	Dutch COVID-19 response team	National Institute for Public Health and the Environment (RIVM)	Adam Meijer et al
Aruba/AW-RIVM-10521/2021	EPI_ISL_905171	2021-01-13	Dutch COVID-19 response team	National Institute for Public Health and the Environment (RIVM)	Adam Meijer et al
Aruba/AW-RIVM-10522/2021	EPI_ISL_905240	2021-01-13	Dutch COVID-19 response team	National Institute for Public Health and the Environment (RIVM)	Adam Meijer et al
Aruba/AW-RIVM-10523/2021	EPI_ISL_905241	2021-01-13	Dutch COVID-19 response team	National Institute for Public Health and the Environment (RIVM)	Adam Meijer et al
Aruba/AW-RIVM-10524/2021	EPI_ISL_905242	2021-01-13	Dutch COVID-19 response team	National Institute for Public Health and the Environment (RIVM)	Adam Meijer et al
Aruba/AW-RIVM-10697/2021	EPI_ISL_904760	2021-01-20	Dutch COVID-19 response team	National Institute for Public Health and the Environment (RIVM)	Adam Meijer et al
Aruba/AW-RIVM-10698/2021	EPI_ISL_904761	2021-01-20	Dutch COVID-19 response team	National Institute for Public Health and the Environment (RIVM)	Adam Meijer et al
Aruba/AW-RIVM-10746/2021	EPI_ISL_1059906	2021-01-20	Dutch COVID-19 response team	National Institute for Public Health and the Environment (RIVM)	Adam Meijer et al
Aruba/AW-RIVM-10747/2021	EPI_ISL_1059907	2021-01-20	Dutch COVID-19 response team	National Institute for Public Health and the Environment (RIVM)	Adam Meijer et al
Aruba/AW-RIVM-10748/2021	EPI_ISL_1059908	2021-01-20	Dutch COVID-19 response team	National Institute for Public Health and the Environment (RIVM)	Adam Meijer et al
Aruba/AW-RIVM-10749/2021	EPI_ISL_1059909	2021-01-20	Dutch COVID-19 response team	National Institute for Public Health and the Environment (RIVM)	Adam Meijer et al
Aruba/AW-RIVM-10750/2021	EPI_ISL_1059905	2021-01-20	Dutch COVID-19 response team	National Institute for Public Health and the Environment (RIVM)	Adam Meijer et al
Aruba/AW-RIVM-10751/2021	EPI_ISL_1059910	2021-01-20	Dutch COVID-19 response team	National Institute for Public Health and the Environment (RIVM)	Adam Meijer et al
Aruba/AW-RIVM-10752/2021	EPI_ISL_1089775	2021-01-20	Dutch COVID-19 response team	National Institute for Public Health and the Environment (RIVM)	Adam Meijer et al
Aruba/AW-RIVM-10753/2021	EPI_ISL_1059911	2021-01-20	Dutch COVID-19 response team	National Institute for Public Health and the Environment (RIVM)	Adam Meijer et al
Aruba/AW-RIVM-10754/2021	EPI_ISL_1059912	2021-01-20	Dutch COVID-19 response team	National Institute for Public Health and the Environment (RIVM)	Adam Meijer et al
Aruba/AW-RIVM-10755/2021	EPI_ISL_1059913	2021-01-20	Dutch COVID-19 response team	National Institute for Public Health and the Environment (RIVM)	Adam Meijer et al
Aruba/AW-RIVM-10756/2021	EPI_ISL_1059914	2021-01-20	Dutch COVID-19 response team	National Institute for Public Health and the Environment (RIVM)	Adam Meijer et al
Aruba/AW-RIVM-10757/2021	EPI_ISL_1059915	2021-01-20	Dutch COVID-19 response team	National Institute for Public Health and the Environment (RIVM)	Adam Meijer et al
Aruba/AW-RIVM-10777/2021	EPI_ISL_904762	2021-01-20	Dutch COVID-19 response team	National Institute for Public Health and the Environment (RIVM)	Adam Meijer et al
Aruba/AW-RIVM-10793/2021	EPI_ISL_1089774	2021-01-20	Dutch COVID-19 response team	National Institute for Public Health and the Environment (RIVM)	Adam Meijer et al
Aruba/AW-RIVM-11381/2021	EPI_ISL_1014282	2021-01-28	Dutch COVID-19 response team	National Institute for Public Health and the Environment (RIVM)	Adam Meijer et al
Aruba/AW-RIVM-11382/2021	EPI_ISL_1014281	2021-01-28	Dutch COVID-19 response team	National Institute for Public Health and the Environment (RIVM)	Adam Meijer et al
Aruba/AW-RIVM-11383/2021	EPI_ISL_1014674	2021-01-28	Dutch COVID-19 response team	National Institute for Public Health and the Environment (RIVM)	Adam Meijer et al
Aruba/AW-RIVM-11384/2021	EPI_ISL_1014673	2021-01-28	Dutch COVID-19 response team	National Institute for Public Health and the Environment (RIVM)	Adam Meijer et al
Aruba/AW-RIVM-11385/2021	EPI_ISL_1014672	2021-01-28	Dutch COVID-19 response team	National Institute for Public Health and the Environment (RIVM)	Adam Meijer et al
Aruba/AW-RIVM-11386/2021	EPI_ISL_1014671	2021-01-28	Dutch COVID-19 response team	National Institute for Public Health and the Environment (RIVM)	Adam Meijer et al
Aruba/AW-RIVM-11387/2021	EPI_ISL_1014670	2021-01-28	Dutch COVID-19 response team	National Institute for Public Health and the Environment (RIVM)	Adam Meijer et al
Aruba/AW-RIVM-11388/2021	EPI_ISL_1014669	2021-01-28	Dutch COVID-19 response team	National Institute for Public Health and the Environment (RIVM)	Adam Meijer et al
Aruba/AW-RIVM-11389/2021	EPI_ISL_1014668	2021-01-28	Dutch COVID-19 response team	National Institute for Public Health and the Environment (RIVM)	Adam Meijer et al
Aruba/AW-RIVM-11390/2021	EPI_ISL_1014667	2021-01-28	Dutch COVID-19 response team	National Institute for Public Health and the Environment (RIVM)	Adam Meijer et al
Aruba/AW-RIVM-11391/2021	EPI_ISL_1014666	2021-01-28	Dutch COVID-19 response team	National Institute for Public Health and the Environment (RIVM)	Adam Meijer et al
Aruba/AW-RIVM-11392/2021	EPI_ISL_1014665	2021-01-28	Dutch COVID-19 response team	National Institute for Public Health and the Environment (RIVM)	Adam Meijer et al
Aruba/AW-RIVM-11393/2021	EPI_ISL_1014664	2021-01-28	Dutch COVID-19 response team	National Institute for Public Health and the Environment (RIVM)	Adam Meijer et al
Aruba/AW-RIVM-11394/2021	EPI_ISL_1014663	2021-01-28	Dutch COVID-19 response team	National Institute for Public Health and the Environment (RIVM)	Adam Meijer et al
Aruba/AW-RIVM-11395/2021	EPI_ISL_1014662	2021-01-28	Dutch COVID-19 response team	National Institute for Public Health and the Environment (RIVM)	Adam Meijer et al
Aruba/AW-RIVM-11396/2021	EPI_ISL_1014661	2021-01-28	Dutch COVID-19 response team	National Institute for Public Health and the Environment (RIVM)	Adam Meijer et al
Aruba/AW-RIVM-11397/2021	EPI_ISL_1014660	2021-01-28	Dutch COVID-19 response team	National Institute for Public Health and the Environment (RIVM)	Adam Meijer et al
Aruba/AW-RIVM-11398/2021	EPI_ISL_1014659	2021-01-28	Dutch COVID-19 response team	National Institute for Public Health and the Environment (RIVM)	Adam Meijer et al
Aruba/AW-RIVM-11399/2021	EPI_ISL_1014658	2021-01-28	Dutch COVID-19 response team	National Institute for Public Health and the Environment (RIVM)	Adam Meijer et al
Aruba/AW-RIVM-11400/2021	EPI_ISL_1014657	2021-01-28	Dutch COVID-19 response team	National Institute for Public Health and the Environment (RIVM)	Adam Meijer et al
Aruba/AW-RIVM-11401/2021	EPI_ISL_1014656	2021-01-28	Dutch COVID-19 response team	National Institute for Public Health and the Environment (RIVM)	Adam Meijer et al
Aruba/AW-RIVM-11402/2021	EPI_ISL_1014240	2021-01-28	Dutch COVID-19 response team	National Institute for Public Health and the Environment (RIVM)	Adam Meijer et al
Aruba/AW-RIVM-11403/2021	EPI_ISL_1014350	2021-01-28	Dutch COVID-19 response team	National Institute for Public Health and the Environment (RIVM)	Adam Meijer et al
Aruba/AW-RIVM-11404/2021	EPI_ISL_1014349	2021-01-28	Dutch COVID-19 response team	National Institute for Public Health and the Environment (RIVM)	Adam Meijer et al
Aruba/AW-RIVM-11405/2021	EPI_ISL_1014655	2021-01-28	Dutch COVID-19 response team	National Institute for Public Health and the Environment (RIVM)	Adam Meijer et al
Aruba/AW-RIVM-11422/2021	EPI_ISL_1014654	2021-01-28	Dutch COVID-19 response team	National Institute for Public Health and the Environment (RIVM)	Adam Meijer et al
Aruba/AW-RIVM-11423/2021	EPI_ISL_1014653	2021-01-28	Dutch COVID-19 response team	National Institute for Public Health and the Environment (RIVM)	Adam Meijer et al
Aruba/AW-RIVM-11424/2021	EPI_ISL_1014652	2021-01-28	Dutch COVID-19 response team	National Institute for Public Health and the Environment (RIVM)	Adam Meijer et al
Aruba/AW-RIVM-11425/2021	EPI_ISL_1014651	2021-01-28	Dutch COVID-19 response team	National Institute for Public Health and the Environment (RIVM)	Adam Meijer et al
Aruba/AW-RIVM-11426/2021	EPI_ISL_1014650	2021-01-28	Dutch COVID-19 response team	National Institute for Public Health and the Environment (RIVM)	Adam Meijer et al
Aruba/AW-RIVM-11427/2021	EPI_ISL_1014649	2021-01-28	Dutch COVID-19 response team	National Institute for Public Health and the Environment (RIVM)	Adam Meijer et al
Aruba/AW-RIVM-11428/2021	EPI_ISL_1014648	2021-01-28	Dutch COVID-19 response team	National Institute for Public Health and the Environment (RIVM)	Adam Meijer et al
Aruba/AW-RIVM-11429/2021	EPI_ISL_1014647	2021-01-28	Dutch COVID-19 response team	National Institute for Public Health and the Environment (RIVM)	Adam Meijer et al
Aruba/AW-RIVM-11430/2021	EPI_ISL_1014646	2021-01-28	Dutch COVID-19 response team	National Institute for Public Health and the Environment (RIVM)	Adam Meijer et al
Aruba/AW-RIVM-11431/2021	EPI_ISL_1014645	2021-01-28	Dutch COVID-19 response team	National Institute for Public Health and the Environment (RIVM)	Adam Meijer et al
Aruba/AW-RIVM-11432/2021	EPI_ISL_1014644	2021-01-28	Dutch COVID-19 response team	National Institute for Public Health and the Environment (RIVM)	Adam Meijer et al
Aruba/AW-RIVM-11545/2021	EPI_ISL_1014280	2021-01-28	Dutch COVID-19 response team	National Institute for Public Health and the Environment (RIVM)	Adam Meijer et al
Aruba/AW-RIVM-11546/2021	EPI_ISL_1014643	2021-01-28	Dutch COVID-19 response team	National Institute for Public Health and the Environment (RIVM)	Adam Meijer et al
Aruba/AW-RIVM-11547/2021	EPI_ISL_1014642	2021-01-28	Dutch COVID-19 response team	National Institute for Public Health and the Environment (RIVM)	Adam Meijer et al
Aruba/AW-RIVM-11548/2021	EPI_ISL_1014641	2021-01-28	Dutch COVID-19 response team	National Institute for Public Health and the Environment (RIVM)	Adam Meijer et al
Aruba/AW-RIVM-11549/2021	EPI_ISL_1014640	2021-01-28	Dutch COVID-19 response team	National Institute for Public Health and the Environment (RIVM)	Adam Meijer et al
Aruba/AW-RIVM-11550/2021	EPI_ISL_1014639	2021-01-28	Dutch COVID-19 response team	National Institute for Public Health and the Environment (RIVM)	Adam Meijer et al
Aruba/AW-RIVM-11551/2021	EPI_ISL_1014638	2021-01-28	Dutch COVID-19 response team	National Institute for Public Health and the Environment (RIVM)	Adam Meijer et al
Aruba/AW-RIVM-11552/2021	EPI_ISL_1014637	2021-01-28	Dutch COVID-19 response team	National Institute for Public Health and the Environment (RIVM)	Adam Meijer et al
Aruba/AW-RIVM-11553/2021	EPI_ISL_1014636	2021-01-28	Dutch COVID-19 response team	National Institute for Public Health and the Environment (RIVM)	Adam Meijer et al
Aruba/AW-RIVM-11554/2021	EPI_ISL_1014635	2021-01-28	Dutch COVID-19 response team	National Institute for Public Health and the Environment (RIVM)	Adam Meijer et al
Aruba/AW-RIVM-11555/2021	EPI_ISL_1014279	2021-01-28	Dutch COVID-19 response team	National Institute for Public Health and the Environment (RIVM)	Adam Meijer et al
Aruba/AW-RIVM-11556/2021	EPI_ISL_1014634	2021-01-28	Dutch COVID-19 response team	National Institute for Public Health and the Environment (RIVM)	Adam Meijer et al
Aruba/AW-RIVM-11557/2021	EPI_ISL_1014633	2021-01-28	Dutch COVID-19 response team	National Institute for Public Health and the Environment (RIVM)	Adam Meijer et al
Aruba/AW-RIVM-11558/2021	EPI_ISL_1014336	2021-01-28	Dutch COVID-19 response team	National Institute for Public Health and the Environment (RIVM)	Adam Meijer et al
Aruba/AW-RIVM-11559/2021	EPI_ISL_1014632	2021-01-28	Dutch COVID-19 response team	National Institute for Public Health and the Environment (RIVM)	Adam Meijer et al
Aruba/AW-RIVM-11560/2021	EPI_ISL_1014335	2021-01-28	Dutch COVID-19 response team	National Institute for Public Health and the Environment (RIVM)	Adam Meijer et al
Aruba/AW-RIVM-11561/2021	EPI_ISL_1014631	2021-01-28	Dutch COVID-19 response team	National Institute for Public Health and the Environment (RIVM)	Adam Meijer et al
Aruba/AW-RIVM-11590/2021	EPI_ISL_1014630	2021-01-28	Dutch COVID-19 response team	National Institute for Public Health and the Environment (RIVM)	Adam Meijer et al
Aruba/AW-RIVM-11591/2021	EPI_ISL_1014629	2021-01-28	Dutch COVID-19 response team	National Institute for Public Health and the Environment (RIVM)	Adam Meijer et al
Aruba/AW-RIVM-11592/2021	EPI_ISL_1014628	2021-01-28	Dutch COVID-19 response team	National Institute for Public Health and the Environment (RIVM)	Adam Meijer et al
Aruba/AW-RIVM-11593/2021	EPI_ISL_1014627	2021-01-28	Dutch COVID-19 response team	National Institute for Public Health and the Environment (RIVM)	Adam Meijer et al
Aruba/AW-RIVM-11594/2021	EPI_ISL_1014626	2021-01-28	Dutch COVID-19 response team	National Institute for Public Health and the Environment (RIVM)	Adam Meijer et al
Aruba/AW-RIVM-11595/2021	EPI_ISL_1014625	2021-01-28	Dutch COVID-19 response team	National Institute for Public Health and the Environment (RIVM)	Adam Meijer et al
Aruba/AW-RIVM-11596/2021	EPI_ISL_1014334	2021-01-28	Dutch COVID-19 response team	National Institute for Public Health and the Environment (RIVM)	Adam Meijer et al
Aruba/AW-RIVM-11597/2021	EPI_ISL_1014624	2021-01-28	Dutch COVID-19 response team	National Institute for Public Health and the Environment (RIVM)	Adam Meijer et al
Aruba/AW-RIVM-11598/2021	EPI_ISL_1014623	2021-01-28	Dutch COVID-19 response team	National Institute for Public Health and the Environment (RIVM)	Adam Meijer et al
Aruba/AW-RIVM-11599/2021	EPI_ISL_1014622	2021-01-28	Dutch COVID-19 response team	National Institute for Public Health and the Environment (RIVM)	Adam Meijer et al
Aruba/AW-RIVM-11600/2021	EPI_ISL_1014621	2021-01-28	Dutch COVID-19 response team	National Institute for Public Health and the Environment (RIVM)	Adam Meijer et al
Aruba/AW-RIVM-11601/2021	EPI_ISL_1014620	2021-01-28	Dutch COVID-19 response team	National Institute for Public Health and the Environment (RIVM)	Adam Meijer et al
Aruba/AW-RIVM-11602/2021	EPI_ISL_1014619	2021-01-28	Dutch COVID-19 response team	National Institute for Public Health and the Environment (RIVM)	Adam Meijer et al
Aruba/AW-RIVM-11603/2021	EPI_ISL_1014618	2021-01-28	Dutch COVID-19 response team	National Institute for Public Health and the Environment (RIVM)	Adam Meijer et al
Aruba/AW-RIVM-11604/2021	EPI_ISL_1014617	2021-01-28	Dutch COVID-19 response team	National Institute for Public Health and the Environment (RIVM)	Adam Meijer et al
Aruba/AW-RIVM-11605/2021	EPI_ISL_1014616	2021-01-28	Dutch COVID-19 response team	National Institute for Public Health and the Environment (RIVM)	Adam Meijer et al
Aruba/AW-RIVM-11606/2021	EPI_ISL_1014615	2021-01-28	Dutch COVID-19 response team	National Institute for Public Health and the Environment (RIVM)	Adam Meijer et al
Aruba/AW-RIVM-11607/2021	EPI_ISL_1014614	2021-01-28	Dutch COVID-19 response team	National Institute for Public Health and the Environment (RIVM)	Adam Meijer et al
Aruba/AW-RIVM-11608/2021	EPI_ISL_1014613	2021-01-28	Dutch COVID-19 response team	National Institute for Public Health and the Environment (RIVM)	Adam Meijer et al
Aruba/AW-RIVM-11609/2021	EPI_ISL_1014333	2021-01-28	Dutch COVID-19 response team	National Institute for Public Health and the Environment (RIVM)	Adam Meijer et al
Aruba/AW-RIVM-11610/2021	EPI_ISL_1014612	2021-01-28	Dutch COVID-19 response team	National Institute for Public Health and the Environment (RIVM)	Adam Meijer et al
Aruba/AW-RIVM-11725/2021	EPI_ISL_1014352	2021-02-01	Dutch COVID-19 response team	National Institute for Public Health and the Environment (RIVM)	Adam Meijer et al
Aruba/AW-RIVM-11726/2021	EPI_ISL_1014351	2021-02-01	Dutch COVID-19 response team	National Institute for Public Health and the Environment (RIVM)	Adam Meijer et al
Aruba/AW-RIVM-11727/2021	EPI_ISL_1014611	2021-02-01	Dutch COVID-19 response team	National Institute for Public Health and the Environment (RIVM)	Adam Meijer et al
Aruba/AW-RIVM-11728/2021	EPI_ISL_1014271	2021-02-01	Dutch COVID-19 response team	National Institute for Public Health and the Environment (RIVM)	Adam Meijer et al
Aruba/AW-RIVM-11729/2021	EPI_ISL_1014270	2021-02-01	Dutch COVID-19 response team	National Institute for Public Health and the Environment (RIVM)	Adam Meijer et al
Aruba/AW-RIVM-11730/2021	EPI_ISL_1014610	2021-02-01	Dutch COVID-19 response team	National Institute for Public Health and the Environment (RIVM)	Adam Meijer et al
Aruba/AW-RIVM-11731/2021	EPI_ISL_1014609	2021-02-01	Dutch COVID-19 response team	National Institute for Public Health and the Environment (RIVM)	Adam Meijer et al
Aruba/AW-RIVM-11732/2021	EPI_ISL_1014332	2021-02-01	Dutch COVID-19 response team	National Institute for Public Health and the Environment (RIVM)	Adam Meijer et al
Aruba/AW-RIVM-11733/2021	EPI_ISL_1014608	2021-02-01	Dutch COVID-19 response team	National Institute for Public Health and the Environment (RIVM)	Adam Meijer et al
Aruba/AW-RIVM-11734/2021	EPI_ISL_1014607	2021-02-01	Dutch COVID-19 response team	National Institute for Public Health and the Environment (RIVM)	Adam Meijer et al
Aruba/AW-RIVM-11735/2021	EPI_ISL_1014606	2021-02-01	Dutch COVID-19 response team	National Institute for Public Health and the Environment (RIVM)	Adam Meijer et al
Aruba/AW-RIVM-11736/2021	EPI_ISL_1014605	2021-02-01	Dutch COVID-19 response team	National Institute for Public Health and the Environment (RIVM)	Adam Meijer et al
Aruba/AW-RIVM-11737/2021	EPI_ISL_1014604	2021-02-01	Dutch COVID-19 response team	National Institute for Public Health and the Environment (RIVM)	Adam Meijer et al
Aruba/AW-RIVM-11738/2021	EPI_ISL_1014603	2021-02-01	Dutch COVID-19 response team	National Institute for Public Health and the Environment (RIVM)	Adam Meijer et al
Aruba/AW-RIVM-11739/2021	EPI_ISL_1014602	2021-02-01	Dutch COVID-19 response team	National Institute for Public Health and the Environment (RIVM)	Adam Meijer et al
Aruba/AW-RIVM-11740/2021	EPI_ISL_1014601	2021-02-01	Dutch COVID-19 response team	National Institute for Public Health and the Environment (RIVM)	Adam Meijer et al
Aruba/AW-RIVM-11741/2021	EPI_ISL_1014600	2021-02-01	Dutch COVID-19 response team	National Institute for Public Health and the Environment (RIVM)	Adam Meijer et al
Aruba/AW-RIVM-11742/2021	EPI_ISL_1014331	2021-02-01	Dutch COVID-19 response team	National Institute for Public Health and the Environment (RIVM)	Adam Meijer et al
Aruba/AW-RIVM-11743/2021	EPI_ISL_1014599	2021-02-01	Dutch COVID-19 response team	National Institute for Public Health and the Environment (RIVM)	Adam Meijer et al
Aruba/AW-RIVM-11744/2021	EPI_ISL_1014598	2021-02-01	Dutch COVID-19 response team	National Institute for Public Health and the Environment (RIVM)	Adam Meijer et al
Aruba/AW-RIVM-11745/2021	EPI_ISL_1014597	2021-02-01	Dutch COVID-19 response team	National Institute for Public Health and the Environment (RIVM)	Adam Meijer et al
Aruba/AW-RIVM-11746/2021	EPI_ISL_1014278	2021-02-01	Dutch COVID-19 response team	National Institute for Public Health and the Environment (RIVM)	Adam Meijer et al
Aruba/AW-RIVM-11747/2021	EPI_ISL_1014330	2021-02-01	Dutch COVID-19 response team	National Institute for Public Health and the Environment (RIVM)	Adam Meijer et al
Aruba/AW-RIVM-11758/2021	EPI_ISL_1013804	2021-02-01	Dutch COVID-19 response team	National Institute for Public Health and the Environment (RIVM)	Adam Meijer et al
Aruba/AW-RIVM-11759/2021	EPI_ISL_1013805	2021-02-01	Dutch COVID-19 response team	National Institute for Public Health and the Environment (RIVM)	Adam Meijer et al
Aruba/AW-RIVM-11760/2021	EPI_ISL_1013806	2021-02-01	Dutch COVID-19 response team	National Institute for Public Health and the Environment (RIVM)	Adam Meijer et al
Aruba/AW-RIVM-11761/2021	EPI_ISL_1013807	2021-02-01	Dutch COVID-19 response team	National Institute for Public Health and the Environment (RIVM)	Adam Meijer et al
Aruba/AW-RIVM-11762/2021	EPI_ISL_1013808	2021-02-01	Dutch COVID-19 response team	National Institute for Public Health and the Environment (RIVM)	Adam Meijer et al
Aruba/AW-RIVM-11763/2021	EPI_ISL_1013809	2021-02-01	Dutch COVID-19 response team	National Institute for Public Health and the Environment (RIVM)	Adam Meijer et al
Aruba/AW-RIVM-11764/2021	EPI_ISL_1013810	2021-02-01	Dutch COVID-19 response team	National Institute for Public Health and the Environment (RIVM)	Adam Meijer et al
Aruba/AW-RIVM-11765/2021	EPI_ISL_1013811	2021-02-01	Dutch COVID-19 response team	National Institute for Public Health and the Environment (RIVM)	Adam Meijer et al
Aruba/AW-RIVM-11766/2021	EPI_ISL_1013812	2021-02-01	Dutch COVID-19 response team	National Institute for Public Health and the Environment (RIVM)	Adam Meijer et al
Aruba/AW-RIVM-11767/2021	EPI_ISL_1013813	2021-02-01	Dutch COVID-19 response team	National Institute for Public Health and the Environment (RIVM)	Adam Meijer et al
Aruba/AW-RIVM-11768/2021	EPI_ISL_1013814	2021-02-01	Dutch COVID-19 response team	National Institute for Public Health and the Environment (RIVM)	Adam Meijer et al
Aruba/AW-RIVM-11769/2021	EPI_ISL_1013815	2021-02-01	Dutch COVID-19 response team	National Institute for Public Health and the Environment (RIVM)	Adam Meijer et al
Aruba/AW-RIVM-11770/2021	EPI_ISL_1013816	2021-02-01	Dutch COVID-19 response team	National Institute for Public Health and the Environment (RIVM)	Adam Meijer et al
Aruba/AW-RIVM-11771/2021	EPI_ISL_1013684	2021-02-01	Dutch COVID-19 response team	National Institute for Public Health and the Environment (RIVM)	Adam Meijer et al
Aruba/AW-RIVM-11772/2021	EPI_ISL_1013817	2021-02-01	Dutch COVID-19 response team	National Institute for Public Health and the Environment (RIVM)	Adam Meijer et al
Aruba/AW-RIVM-11773/2021	EPI_ISL_1013818	2021-02-01	Dutch COVID-19 response team	National Institute for Public Health and the Environment (RIVM)	Adam Meijer et al
Aruba/AW-RIVM-11774/2021	EPI_ISL_1013696	2021-02-01	Dutch COVID-19 response team	National Institute for Public Health and the Environment (RIVM)	Adam Meijer et al
Aruba/AW-RIVM-12787/2021	EPI_ISL_1035808	2021-02-08	Dutch COVID-19 response team	National Institute for Public Health and the Environment (RIVM)	Adam Meijer et al
Aruba/AW-RIVM-12788/2021	EPI_ISL_1035807	2021-02-08	Dutch COVID-19 response team	National Institute for Public Health and the Environment (RIVM)	Adam Meijer et al
Aruba/AW-RIVM-12789/2021	EPI_ISL_1035806	2021-02-08	Dutch COVID-19 response team	National Institute for Public Health and the Environment (RIVM)	Adam Meijer et al
Aruba/AW-RIVM-12790/2021	EPI_ISL_1035805	2021-02-08	Dutch COVID-19 response team	National Institute for Public Health and the Environment (RIVM)	Adam Meijer et al
Aruba/AW-RIVM-12791/2021	EPI_ISL_1035804	2021-02-08	Dutch COVID-19 response team	National Institute for Public Health and the Environment (RIVM)	Adam Meijer et al
Aruba/AW-RIVM-12792/2021	EPI_ISL_1035803	2021-02-08	Dutch COVID-19 response team	National Institute for Public Health and the Environment (RIVM)	Adam Meijer et al
Aruba/AW-RIVM-12793/2021	EPI_ISL_1035802	2021-02-08	Dutch COVID-19 response team	National Institute for Public Health and the Environment (RIVM)	Adam Meijer et al
Aruba/AW-RIVM-12794/2021	EPI_ISL_1035801	2021-02-08	Dutch COVID-19 response team	National Institute for Public Health and the Environment (RIVM)	Adam Meijer et al
Aruba/AW-RIVM-12795/2021	EPI_ISL_1035800	2021-02-08	Dutch COVID-19 response team	National Institute for Public Health and the Environment (RIVM)	Adam Meijer et al
Aruba/AW-RIVM-12796/2021	EPI_ISL_1035799	2021-02-08	Dutch COVID-19 response team	National Institute for Public Health and the Environment (RIVM)	Adam Meijer et al
Aruba/AW-RIVM-12797/2021	EPI_ISL_1035798	2021-02-08	Dutch COVID-19 response team	National Institute for Public Health and the Environment (RIVM)	Adam Meijer et al
Aruba/AW-RIVM-12798/2021	EPI_ISL_1035797	2021-02-08	Dutch COVID-19 response team	National Institute for Public Health and the Environment (RIVM)	Adam Meijer et al
Aruba/AW-RIVM-12799/2021	EPI_ISL_1035796	2021-02-08	Dutch COVID-19 response team	National Institute for Public Health and the Environment (RIVM)	Adam Meijer et al
Aruba/AW-RIVM-12800/2021	EPI_ISL_1035082	2021-02-08	Dutch COVID-19 response team	National Institute for Public Health and the Environment (RIVM)	Adam Meijer et al
Aruba/AW-RIVM-12801/2021	EPI_ISL_1035795	2021-02-08	Dutch COVID-19 response team	National Institute for Public Health and the Environment (RIVM)	Adam Meijer et al
Aruba/AW-RIVM-12802/2021	EPI_ISL_1035794	2021-02-08	Dutch COVID-19 response team	National Institute for Public Health and the Environment (RIVM)	Adam Meijer et al
Aruba/AW-RIVM-12803/2021	EPI_ISL_1035793	2021-02-08	Dutch COVID-19 response team	National Institute for Public Health and the Environment (RIVM)	Adam Meijer et al
Aruba/AW-RIVM-12804/2021	EPI_ISL_1035081	2021-02-08	Dutch COVID-19 response team	National Institute for Public Health and the Environment (RIVM)	Adam Meijer et al
Aruba/AW-RIVM-12805/2021	EPI_ISL_1035792	2021-02-08	Dutch COVID-19 response team	National Institute for Public Health and the Environment (RIVM)	Adam Meijer et al
Aruba/AW-RIVM-12806/2021	EPI_ISL_1035080	2021-02-08	Dutch COVID-19 response team	National Institute for Public Health and the Environment (RIVM)	Adam Meijer et al
Aruba/AW-RIVM-12807/2021	EPI_ISL_1035079	2021-02-08	Dutch COVID-19 response team	National Institute for Public Health and the Environment (RIVM)	Adam Meijer et al
Aruba/AW-RIVM-12808/2021	EPI_ISL_1035791	2021-02-08	Dutch COVID-19 response team	National Institute for Public Health and the Environment (RIVM)	Adam Meijer et al
Aruba/AW-RIVM-12809/2021	EPI_ISL_1035790	2021-02-08	Dutch COVID-19 response team	National Institute for Public Health and the Environment (RIVM)	Adam Meijer et al
Aruba/AW-RIVM-12810/2021	EPI_ISL_1035789	2021-02-08	Dutch COVID-19 response team	National Institute for Public Health and the Environment (RIVM)	Adam Meijer et al
Aruba/AW-RIVM-12811/2021	EPI_ISL_1035788	2021-02-08	Dutch COVID-19 response team	National Institute for Public Health and the Environment (RIVM)	Adam Meijer et al
Aruba/AW-RIVM-12812/2021	EPI_ISL_1035787	2021-02-08	Dutch COVID-19 response team	National Institute for Public Health and the Environment (RIVM)	Adam Meijer et al
Aruba/AW-RIVM-12813/2021	EPI_ISL_1035786	2021-02-08	Dutch COVID-19 response team	National Institute for Public Health and the Environment (RIVM)	Adam Meijer et al
Aruba/AW-RIVM-12814/2021	EPI_ISL_1035785	2021-02-08	Dutch COVID-19 response team	National Institute for Public Health and the Environment (RIVM)	Adam Meijer et al
Aruba/AW-RIVM-12815/2021	EPI_ISL_1035207	2021-02-08	Dutch COVID-19 response team	National Institute for Public Health and the Environment (RIVM)	Adam Meijer et al
Aruba/AW-RIVM-12816/2021	EPI_ISL_1035237	2021-02-08	Dutch COVID-19 response team	National Institute for Public Health and the Environment (RIVM)	Adam Meijer et al
Aruba/AW-RIVM-12817/2021	EPI_ISL_1035236	2021-02-08	Dutch COVID-19 response team	National Institute for Public Health and the Environment (RIVM)	Adam Meijer et al
Aruba/AW-RIVM-13169/2021	EPI_ISL_1035784	2021-02-10	Dutch COVID-19 response team	National Institute for Public Health and the Environment (RIVM)	Adam Meijer et al
Aruba/AW-RIVM-13170/2021	EPI_ISL_1035783	2021-02-10	Dutch COVID-19 response team	National Institute for Public Health and the Environment (RIVM)	Adam Meijer et al
Aruba/AW-RIVM-13171/2021	EPI_ISL_1035782	2021-02-10	Dutch COVID-19 response team	National Institute for Public Health and the Environment (RIVM)	Adam Meijer et al
Aruba/AW-RIVM-13172/2021	EPI_ISL_1035781	2021-02-10	Dutch COVID-19 response team	National Institute for Public Health and the Environment (RIVM)	Adam Meijer et al
Aruba/AW-RIVM-13173/2021	EPI_ISL_1035780	2021-02-10	Dutch COVID-19 response team	National Institute for Public Health and the Environment (RIVM)	Adam Meijer et al
Aruba/AW-RIVM-13174/2021	EPI_ISL_1035779	2021-02-10	Dutch COVID-19 response team	National Institute for Public Health and the Environment (RIVM)	Adam Meijer et al
Aruba/AW-RIVM-13175/2021	EPI_ISL_1035778	2021-02-10	Dutch COVID-19 response team	National Institute for Public Health and the Environment (RIVM)	Adam Meijer et al
Aruba/AW-RIVM-13176/2021	EPI_ISL_1035777	2021-02-10	Dutch COVID-19 response team	National Institute for Public Health and the Environment (RIVM)	Adam Meijer et al
Aruba/AW-RIVM-13177/2021	EPI_ISL_1035776	2021-02-10	Dutch COVID-19 response team	National Institute for Public Health and the Environment (RIVM)	Adam Meijer et al
Aruba/AW-RIVM-13178/2021	EPI_ISL_1035775	2021-02-10	Dutch COVID-19 response team	National Institute for Public Health and the Environment (RIVM)	Adam Meijer et al
Aruba/AW-RIVM-13179/2021	EPI_ISL_1035774	2021-02-10	Dutch COVID-19 response team	National Institute for Public Health and the Environment (RIVM)	Adam Meijer et al
Aruba/AW-RIVM-13180/2021	EPI_ISL_1035773	2021-02-10	Dutch COVID-19 response team	National Institute for Public Health and the Environment (RIVM)	Adam Meijer et al
Aruba/AW-RIVM-13181/2021	EPI_ISL_1035772	2021-02-10	Dutch COVID-19 response team	National Institute for Public Health and the Environment (RIVM)	Adam Meijer et al
Aruba/AW-RIVM-13646/2021	EPI_ISL_1090195	2021-02-12	Dutch COVID-19 response team	National Institute for Public Health and the Environment (RIVM)	Adam Meijer et al
Aruba/AW-RIVM-13651/2021	EPI_ISL_1090196	2021-02-12	Dutch COVID-19 response team	National Institute for Public Health and the Environment (RIVM)	Adam Meijer et al
Aruba/AW-RIVM-13652/2021	EPI_ISL_1090197	2021-02-12	Dutch COVID-19 response team	National Institute for Public Health and the Environment (RIVM)	Adam Meijer et al
Aruba/AW-RIVM-13658/2021	EPI_ISL_1090198	2021-02-12	Dutch COVID-19 response team	National Institute for Public Health and the Environment (RIVM)	Adam Meijer et al
Aruba/AW-RIVM-13663/2021	EPI_ISL_1090199	2021-02-12	Dutch COVID-19 response team	National Institute for Public Health and the Environment (RIVM)	Adam Meijer et al
Aruba/AW-RIVM-13664/2021	EPI_ISL_1090200	2021-02-12	Dutch COVID-19 response team	National Institute for Public Health and the Environment (RIVM)	Adam Meijer et al
Aruba/AW-RIVM-13674/2021	EPI_ISL_1090201	2021-02-12	Dutch COVID-19 response team	National Institute for Public Health and the Environment (RIVM)	Adam Meijer et al
Aruba/AW-RIVM-13675/2021	EPI_ISL_1090202	2021-02-12	Dutch COVID-19 response team	National Institute for Public Health and the Environment (RIVM)	Adam Meijer et al
Aruba/AW-RIVM-13684/2021	EPI_ISL_1090203	2021-02-12	Dutch COVID-19 response team	National Institute for Public Health and the Environment (RIVM)	Adam Meijer et al
Aruba/AW-RIVM-13685/2021	EPI_ISL_1089592	2021-02-12	Dutch COVID-19 response team	National Institute for Public Health and the Environment (RIVM)	Adam Meijer et al
Aruba/AW-RIVM-13689/2021	EPI_ISL_1090204	2021-02-12	Dutch COVID-19 response team	National Institute for Public Health and the Environment (RIVM)	Adam Meijer et al
Aruba/AW-RIVM-13695/2021	EPI_ISL_1090205	2021-02-12	Dutch COVID-19 response team	National Institute for Public Health and the Environment (RIVM)	Adam Meijer et al
Aruba/AW-RIVM-13701/2021	EPI_ISL_1090206	2021-02-12	Dutch COVID-19 response team	National Institute for Public Health and the Environment (RIVM)	Adam Meijer et al
Aruba/AW-RIVM-13706/2021	EPI_ISL_1089604	2021-02-12	Dutch COVID-19 response team	National Institute for Public Health and the Environment (RIVM)	Adam Meijer et al
Aruba/AW-RIVM-13707/2021	EPI_ISL_1089605	2021-02-12	Dutch COVID-19 response team	National Institute for Public Health and the Environment (RIVM)	Adam Meijer et al
Aruba/AW-RIVM-13713/2021	EPI_ISL_1089606	2021-02-12	Dutch COVID-19 response team	National Institute for Public Health and the Environment (RIVM)	Adam Meijer et al
Aruba/AW-RIVM-13718/2021	EPI_ISL_1090207	2021-02-12	Dutch COVID-19 response team	National Institute for Public Health and the Environment (RIVM)	Adam Meijer et al
Aruba/AW-RIVM-13719/2021	EPI_ISL_1090208	2021-02-12	Dutch COVID-19 response team	National Institute for Public Health and the Environment (RIVM)	Adam Meijer et al
Aruba/AW-RIVM-13729/2021	EPI_ISL_1090209	2021-02-12	Dutch COVID-19 response team	National Institute for Public Health and the Environment (RIVM)	Adam Meijer et al
Aruba/AW-RIVM-13730/2021	EPI_ISL_1090210	2021-02-12	Dutch COVID-19 response team	National Institute for Public Health and the Environment (RIVM)	Adam Meijer et al
Aruba/AW-RIVM-13745/2021	EPI_ISL_1090211	2021-02-12	Dutch COVID-19 response team	National Institute for Public Health and the Environment (RIVM)	Adam Meijer et al
Aruba/AW-RIVM-13749/2021	EPI_ISL_1089607	2021-02-12	Dutch COVID-19 response team	National Institute for Public Health and the Environment (RIVM)	Adam Meijer et al
Aruba/AW-RIVM-13754/2021	EPI_ISL_1090212	2021-02-12	Dutch COVID-19 response team	National Institute for Public Health and the Environment (RIVM)	Adam Meijer et al
Aruba/AW-RIVM-13757/2021	EPI_ISL_1090213	2021-02-12	Dutch COVID-19 response team	National Institute for Public Health and the Environment (RIVM)	Adam Meijer et al
Aruba/AW-RIVM-13762/2021	EPI_ISL_1090214	2021-02-12	Dutch COVID-19 response team	National Institute for Public Health and the Environment (RIVM)	Adam Meijer et al
Aruba/AW-RIVM-13771/2021	EPI_ISL_1090215	2021-02-12	Dutch COVID-19 response team	National Institute for Public Health and the Environment (RIVM)	Adam Meijer et al
Aruba/AW-RIVM-13772/2021	EPI_ISL_1090216	2021-02-12	Dutch COVID-19 response team	National Institute for Public Health and the Environment (RIVM)	Adam Meijer et al
Aruba/AW-RIVM-13779/2021	EPI_ISL_1090217	2021-02-12	Dutch COVID-19 response team	National Institute for Public Health and the Environment (RIVM)	Adam Meijer et al
Aruba/AW-RIVM-13780/2021	EPI_ISL_1090218	2021-02-12	Dutch COVID-19 response team	National Institute for Public Health and the Environment (RIVM)	Adam Meijer et al
Aruba/AW-RIVM-13787/2021	EPI_ISL_1090219	2021-02-12	Dutch COVID-19 response team	National Institute for Public Health and the Environment (RIVM)	Adam Meijer et al
Aruba/AW-RIVM-13794/2021	EPI_ISL_1090220	2021-02-12	Dutch COVID-19 response team	National Institute for Public Health and the Environment (RIVM)	Adam Meijer et al
Aruba/AW-RIVM-15499/2021	EPI_ISL_1216230	2021-01-13	Dutch COVID-19 response team	National Institute for Public Health and the Environment (RIVM)	Adam Meijer et al
Aruba/AW-RIVM-15500/2021	EPI_ISL_1216232	2021-01-13	Dutch COVID-19 response team	National Institute for Public Health and the Environment (RIVM)	Adam Meijer et al
Aruba/AW-RIVM-15501/2021	EPI_ISL_1216234	2021-01-13	Dutch COVID-19 response team	National Institute for Public Health and the Environment (RIVM)	Adam Meijer et al
Aruba/AW-RIVM-15502/2021	EPI_ISL_1216236	2021-01-13	Dutch COVID-19 response team	National Institute for Public Health and the Environment (RIVM)	Adam Meijer et al
Aruba/AW-RIVM-15503/2021	EPI_ISL_1216238	2021-01-13	Dutch COVID-19 response team	National Institute for Public Health and the Environment (RIVM)	Adam Meijer et al
Australia/ACT0001/2020	EPI_ISL_498468	2020-03-12	ACT Pathology	Schwessinger Lab	Ashley Jones et al
Australia/ACT0002/2020	EPI_ISL_498469	2020-03-21	ACT Pathology	Schwessinger Lab	Ashley Jones et al
Australia/ACT0003/2020	EPI_ISL_498470	2020-03-28	ACT Pathology	Schwessinger Lab	Ashley Jones et al
Australia/ACT0004/2020	EPI_ISL_498471	2020-03-24	ACT Pathology	Schwessinger Lab	Ashley Jones et al
Australia/ACT0005/2020	EPI_ISL_498472	2020-03-25	ACT Pathology	Schwessinger Lab	Ashley Jones et al
Australia/ACT0006/2020	EPI_ISL_498473	2020-03-25	ACT Pathology	Schwessinger Lab	Ashley Jones et al
Australia/ACT0007/2020	EPI_ISL_498474	2020-03-25	ACT Pathology	Schwessinger Lab	Ashley Jones et al
Australia/ACT0008/2020	EPI_ISL_498475	2020-03-24	ACT Pathology	Schwessinger Lab	Ashley Jones et al
Australia/ACT0009/2020	EPI_ISL_498476	2020-03-27	ACT Pathology	Schwessinger Lab	Ashley Jones et al
Australia/ACT0010/2020	EPI_ISL_498477	2020-03-25	ACT Pathology	Schwessinger Lab	Ashley Jones et al
Australia/ACT0011/2020	EPI_ISL_498478	2020-03-21	ACT Pathology	Schwessinger Lab	Ashley Jones et al
Australia/ACT0012/2020	EPI_ISL_498479	2020-03-23	ACT Pathology	Schwessinger Lab	Ashley Jones et al
Australia/ACT0013/2020	EPI_ISL_498480	2020-03-22	ACT Pathology	Schwessinger Lab	Ashley Jones et al
Australia/ACT0014/2020	EPI_ISL_498481	2020-03-18	ACT Pathology	Schwessinger Lab	Ashley Jones et al
Australia/ACT0015/2020	EPI_ISL_498482	2020-03-20	ACT Pathology	Schwessinger Lab	Ashley Jones et al
Australia/ACT0016/2020	EPI_ISL_498483	2020-03-22	ACT Pathology	Schwessinger Lab	Ashley Jones et al
Australia/ACT0017/2020	EPI_ISL_498484	2020-03-21	ACT Pathology	Schwessinger Lab	Ashley Jones et al
Australia/ACT0018/2020	EPI_ISL_498485	2020-03-21	ACT Pathology	Schwessinger Lab	Ashley Jones et al
Australia/ACT0019/2020	EPI_ISL_498486	2020-03-20	ACT Pathology	Schwessinger Lab	Ashley Jones et al
Australia/ACT0020/2020	EPI_ISL_498487	2020-03-21	ACT Pathology	Schwessinger Lab	Ashley Jones et al
Australia/ACT0021/2020	EPI_ISL_498488	2020-03-14	ACT Pathology	Schwessinger Lab	Ashley Jones et al
Australia/ACT0022/2020	EPI_ISL_498489	2020-03-20	ACT Pathology	Schwessinger Lab	Ashley Jones et al
Australia/ACT0023/2020	EPI_ISL_498490	2020-03-20	ACT Pathology	Schwessinger Lab	Ashley Jones et al
Australia/ACT0024/2020	EPI_ISL_498491	2020-03-23	ACT Pathology	Schwessinger Lab	Ashley Jones et al
Australia/ACT0025/2020	EPI_ISL_498492	2020-03-18	ACT Pathology	Schwessinger Lab	Ashley Jones et al
Australia/ACT0026/2020	EPI_ISL_498493	2020-03-23	ACT Pathology	Schwessinger Lab	Ashley Jones et al
Australia/ACT0027/2020	EPI_ISL_498494	2020-03-22	ACT Pathology	Schwessinger Lab	Ashley Jones et al
Australia/ACT0028/2020	EPI_ISL_498495	2020-03-23	ACT Pathology	Schwessinger Lab	Ashley Jones et al
Australia/ACT0029/2020	EPI_ISL_498496	2020-03-20	ACT Pathology	Schwessinger Lab	Ashley Jones et al
Australia/ACT0030/2020	EPI_ISL_498497	2020-03-25	ACT Pathology	Schwessinger Lab	Ashley Jones et al
Australia/ACT0031/2020	EPI_ISL_498498	2020-03-24	ACT Pathology	Schwessinger Lab	Ashley Jones et al
Australia/ACT0032/2020	EPI_ISL_498499	2020-03-25	ACT Pathology	Schwessinger Lab	Ashley Jones et al
Australia/ACT0033/2020	EPI_ISL_498500	2020-03-24	ACT Pathology	Schwessinger Lab	Ashley Jones et al
Australia/ACT0034/2020	EPI_ISL_498501	2020-03-24	ACT Pathology	Schwessinger Lab	Ashley Jones et al
Australia/ACT0035/2020	EPI_ISL_498502	2020-03-25	ACT Pathology	Schwessinger Lab	Ashley Jones et al
Australia/ACT0036/2020	EPI_ISL_498503	2020-03-24	ACT Pathology	Schwessinger Lab	Ashley Jones et al
Australia/ACT0037/2020	EPI_ISL_498504	2020-03-21	ACT Pathology	Schwessinger Lab	Ashley Jones et al
Australia/ACT0038/2020	EPI_ISL_498505	2020-03-23	ACT Pathology	Schwessinger Lab	Ashley Jones et al
Australia/ACT0039/2020	EPI_ISL_498506	2020-03-22	ACT Pathology	Schwessinger Lab	Ashley Jones et al
Australia/ACT0040/2020	EPI_ISL_498507	2020-03-25	ACT Pathology	Schwessinger Lab	Ashley Jones et al
Australia/ACT0041/2020	EPI_ISL_498508	2020-03-31	ACT Pathology	Schwessinger Lab	Ashley Jones et al
Australia/ACT0042/2020	EPI_ISL_498509	2020-03-24	ACT Pathology	Schwessinger Lab	Ashley Jones et al
Australia/ACT0043/2020	EPI_ISL_498510	2020-03-27	ACT Pathology	Schwessinger Lab	Ashley Jones et al
Australia/ACT0044/2020	EPI_ISL_498511	2020-03-26	ACT Pathology	Schwessinger Lab	Ashley Jones et al
Australia/ACT0045/2020	EPI_ISL_498512	2020-03-23	ACT Pathology	Schwessinger Lab	Ashley Jones et al
Australia/ACT0046/2020	EPI_ISL_498513	2020-03-20	ACT Pathology	Schwessinger Lab	Ashley Jones et al
Australia/ACT0047/2020	EPI_ISL_498514	2020-03-16	ACT Pathology	Schwessinger Lab	Ashley Jones et al
Australia/ACT0048/2020	EPI_ISL_498515	2020-03-19	ACT Pathology	Schwessinger Lab	Ashley Jones et al
Australia/ACT0049/2020	EPI_ISL_498516	2020-03-29	ACT Pathology	Schwessinger Lab	Ashley Jones et al
Australia/ACT0050/2020	EPI_ISL_498517	2020-03-24	ACT Pathology	Schwessinger Lab	Ashley Jones et al
Australia/ACT0051/2020	EPI_ISL_498518	2020-04-07	ACT Pathology	Schwessinger Lab	Ashley Jones et al
Australia/ACT0053/2020	EPI_ISL_498519	2020-03-20	ACT Pathology	Schwessinger Lab	Ashley Jones et al
Australia/ACT0054/2020	EPI_ISL_498520	2020-04-03	ACT Pathology	Schwessinger Lab	Ashley Jones et al
Australia/ACT0055/2020	EPI_ISL_498521	2020-03-27	ACT Pathology	Schwessinger Lab	Ashley Jones et al
Australia/ACT0058/2020	EPI_ISL_498522	2020-03-27	ACT Pathology	Schwessinger Lab	Ashley Jones et al
Australia/ACT0059/2020	EPI_ISL_498523	2020-04-12	ACT Pathology	Schwessinger Lab	Ashley Jones et al
Australia/ACT0060/2020	EPI_ISL_498524	2020-04-01	ACT Pathology	Schwessinger Lab	Ashley Jones et al
Australia/ACT0061/2020	EPI_ISL_498525	2020-03-24	ACT Pathology	Schwessinger Lab	Ashley Jones et al
Australia/ACT0064/2020	EPI_ISL_498526	2020-03-31	ACT Pathology	Schwessinger Lab	Ashley Jones et al
Australia/ACT0065/2020	EPI_ISL_498527	2020-03-27	ACT Pathology	Schwessinger Lab	Ashley Jones et al
Australia/ACT0067/2020	EPI_ISL_498528	2020-04-06	ACT Pathology	Schwessinger Lab	Ashley Jones et al
Australia/ACT0068/2020	EPI_ISL_498529	2020-03-18	ACT Pathology	Schwessinger Lab	Ashley Jones et al
Australia/ACT0069/2020	EPI_ISL_498530	2020-03-31	ACT Pathology	Schwessinger Lab	Ashley Jones et al
Australia/ACT0071/2020	EPI_ISL_498531	2020-03-22	ACT Pathology	Schwessinger Lab	Ashley Jones et al
Australia/ACT0072/2020	EPI_ISL_498532	2020-03-27	ACT Pathology	Schwessinger Lab	Ashley Jones et al
Australia/ACT0073/2020	EPI_ISL_498533	2020-04-02	ACT Pathology	Schwessinger Lab	Ashley Jones et al
Australia/ACT0074/2020	EPI_ISL_498534	2020-05-16	ACT Pathology	Schwessinger Lab	Ashley Jones et al
Australia/ACT0075/2020	EPI_ISL_498535	2020-04-02	ACT Pathology	Schwessinger Lab	Ashley Jones et al
Australia/ACT0076/2020	EPI_ISL_498536	2020-03-27	ACT Pathology	Schwessinger Lab	Ashley Jones et al
Australia/ACT0077/2020	EPI_ISL_498537	2020-03-25	ACT Pathology	Schwessinger Lab	Ashley Jones et al
Australia/ACT0078/2020	EPI_ISL_498538	2020-03-18	ACT Pathology	Schwessinger Lab	Ashley Jones et al
Australia/ACT0079/2020	EPI_ISL_498539	2020-04-09	ACT Pathology	Schwessinger Lab	Ashley Jones et al
Australia/ACT0080/2020	EPI_ISL_498540	2020-03-30	ACT Pathology	Schwessinger Lab	Ashley Jones et al
Australia/ACT0081/2020	EPI_ISL_498541	2020-03-24	ACT Pathology	Schwessinger Lab	Ashley Jones et al
Australia/ACT0082/2020	EPI_ISL_498542	2020-03-15	ACT Pathology	Schwessinger Lab	Ashley Jones et al
Australia/ACT0084/2020	EPI_ISL_498543	2020-06-15	ACT Pathology	Schwessinger Lab	Ashley Jones et al
Australia/ACT0086/2020	EPI_ISL_498544	2020-07-03	ACT Pathology	Schwessinger Lab	Ashley Jones et al
Australia/ACT0087/2020	EPI_ISL_498545	2020-07-03	ACT Pathology	Schwessinger Lab	Ashley Jones et al
Australia/ACT0088/2020	EPI_ISL_498546	2020-07-03	ACT Pathology	Schwessinger Lab	Ashley Jones et al
Australia/ACT0089/2020	EPI_ISL_498547	2020-07-03	ACT Pathology	Schwessinger Lab	Ashley Jones et al
Australia/ACT0090/2020	EPI_ISL_498548	2020-07-03	ACT Pathology	Schwessinger Lab	Ashley Jones et al
Australia/ACT0094/2020	EPI_ISL_735503	2020-12-19	ACT Pathology	Schwessinger Lab	Robyn N Hall et al
Australia/ACT0095/2021	EPI_ISL_1170946	2021-03-03	ACT Pathology	Schwessinger Lab	Ashley Jones et al
Australia/ACT0096/2021	EPI_ISL_1170947	2021-03-03	ACT Pathology	Schwessinger Lab	Ashley Jones et al
Australia/ACT0097/2021	EPI_ISL_1208400	2021-03-06	ACT Pathology	Schwessinger Lab	Ashley Jones et al
Australia/ACT0098/2021	EPI_ISL_1208401	2021-03-08	ACT Pathology	Schwessinger Lab	Ashley Jones et al
Australia/ACT0099/2021	EPI_ISL_1208402	2021-03-09	ACT Pathology	Schwessinger Lab	Ashley Jones et al
Australia/NSW-R0007/2021	EPI_ISL_1010700	2021-01-22	New South Wales Health Pathology Royal Prince Alfred Hospital	Microbiology RPAH	Foster et al
Australia/NSW-R0009/2021	EPI_ISL_1033025	2021-01-22	New South Wales Health Pathology Royal Prince Alfred Hospital	Microbiology RPAH	Foster et al
Australia/NSW-R0011/2021	EPI_ISL_1033024	2021-01-22	New South Wales Health Pathology Royal Prince Alfred Hospital	Microbiology RPAH	Foster et al
Australia/NSW-R0014/2021	EPI_ISL_1010699	2021-01-22	New South Wales Health Pathology Royal Prince Alfred Hospital	Microbiology RPAH	Foster et al
Australia/NSW-R0016/2021	EPI_ISL_1010701	2021-01-28	New South Wales Health Pathology Royal Prince Alfred Hospital	Microbiology RPAH	Foster et al
Australia/NSW-R0017/2021	EPI_ISL_1010702	2021-01-28	New South Wales Health Pathology Royal Prince Alfred Hospital	Microbiology RPAH	Foster et al
Australia/NSW-R0018/2021	EPI_ISL_1010703	2021-01-28	New South Wales Health Pathology Royal Prince Alfred Hospital	Microbiology RPAH	Foster et al
Australia/NSW-R0019/2021	EPI_ISL_1010704	2021-01-28	New South Wales Health Pathology Royal Prince Alfred Hospital	Microbiology RPAH	Foster et al
Australia/NSW-R0020/2021	EPI_ISL_1010707	2021-02-02	New South Wales Health Pathology Royal Prince Alfred Hospital	Microbiology RPAH	Foster et al
Australia/NSW-R0023/2021	EPI_ISL_1033026	2021-02-02	New South Wales Health Pathology Royal Prince Alfred Hospital	Microbiology RPAH	Foster et al
Australia/NSW-R0024/2021	EPI_ISL_1010708	2021-02-02	New South Wales Health Pathology Royal Prince Alfred Hospital	Microbiology RPAH	Foster et al
Australia/NSW-R0054/2021	EPI_ISL_1010709	2021-02-04	New South Wales Health Pathology Royal Prince Alfred Hospital	Microbiology RPAH	Foster et al
Australia/NSW-R0063/2021	EPI_ISL_1010712	2021-02-12	New South Wales Health Pathology Royal Prince Alfred Hospital	Microbiology RPAH	Foster et al
Australia/NSW-R0064/2021	EPI_ISL_1010710	2021-02-12	New South Wales Health Pathology Royal Prince Alfred Hospital	Microbiology RPAH	Foster et al
Australia/NSW-R0065/2021	EPI_ISL_1010711	2021-02-12	New South Wales Health Pathology Royal Prince Alfred Hospital	Microbiology RPAH	Foster et al
Australia/NSW-R0066/2021	EPI_ISL_1033027	2021-02-12	New South Wales Health Pathology Royal Prince Alfred Hospital	Microbiology RPAH	Foster et al
Australia/NSW-R0067/2021	EPI_ISL_1010713	2021-02-12	New South Wales Health Pathology Royal Prince Alfred Hospital	Microbiology RPAH	Foster et al
Australia/NSW-R0068/2021	EPI_ISL_1010714	2021-02-16	New South Wales Health Pathology Royal Prince Alfred Hospital	Microbiology RPAH	Foster et al
Australia/NSW-R0069/2021	EPI_ISL_1010715	2021-02-16	New South Wales Health Pathology Royal Prince Alfred Hospital	Microbiology RPAH	Foster et al
Australia/NSW-R0070/2021	EPI_ISL_1061033	2021-02-16	New South Wales Health Pathology Royal Prince Alfred Hospital	Microbiology RPAH	Foster et al
Australia/NSW-R0071/2021	EPI_ISL_1061037	2021-02-16	New South Wales Health Pathology Royal Prince Alfred Hospital	Microbiology RPAH	Foster et al
Australia/NSW-R0074/2021	EPI_ISL_1061034	2021-02-17	New South Wales Health Pathology Royal Prince Alfred Hospital	Microbiology RPAH	Foster et al
Australia/NSW-R0075/2021	EPI_ISL_1061035	2021-02-17	New South Wales Health Pathology Royal Prince Alfred Hospital	Microbiology RPAH	Foster et al
Australia/NSW-R0076/2021	EPI_ISL_1061036	2021-02-19	New South Wales Health Pathology Royal Prince Alfred Hospital	Microbiology RPAH	Foster et al
Australia/NSW-R0086/2021	EPI_ISL_1121977	2021-02-24	New South Wales Health Pathology Royal Prince Alfred Hospital	Microbiology RPAH	Foster et al
Australia/NSW-R0087/2021	EPI_ISL_1121978	2021-02-23	New South Wales Health Pathology Royal Prince Alfred Hospital	Microbiology RPAH	Foster et al
Australia/NSW-R0088/2021	EPI_ISL_1121979	2021-02-23	New South Wales Health Pathology Royal Prince Alfred Hospital	Microbiology RPAH	Foster et al
Australia/NSW-R0092/2021	EPI_ISL_1121981	2021-02-24	New South Wales Health Pathology Royal Prince Alfred Hospital	Microbiology RPAH	Foster et al
Australia/NSW-R0093/2021	EPI_ISL_1121982	2021-02-25	New South Wales Health Pathology Royal Prince Alfred Hospital	Microbiology RPAH	Foster et al
Australia/NSW-R0094/2021	EPI_ISL_1121983	2021-02-25	New South Wales Health Pathology Royal Prince Alfred Hospital	Microbiology RPAH	Foster et al
Australia/NSW-R0095/2021	EPI_ISL_1121984	2021-02-27	New South Wales Health Pathology Royal Prince Alfred Hospital	Microbiology RPAH	Foster et al
Australia/NSW-R0096/2021	EPI_ISL_1121985	2021-02-27	New South Wales Health Pathology Royal Prince Alfred Hospital	Microbiology RPAH	Foster et al
Australia/NSW-R0097/2021	EPI_ISL_1121986	2021-02-27	New South Wales Health Pathology Royal Prince Alfred Hospital	Microbiology RPAH	Foster et al
Australia/NSW-R0099/2021	EPI_ISL_1121987	2021-02-27	New South Wales Health Pathology Royal Prince Alfred Hospital	Microbiology RPAH	Foster et al
Australia/NSW-R0100/2021	EPI_ISL_1121988	2021-02-27	New South Wales Health Pathology Royal Prince Alfred Hospital	Microbiology RPAH	Foster et al
Australia/NSW-R0117/2021	EPI_ISL_1205303	2021-03-02	New South Wales Health Pathology Royal Prince Alfred Hospital	Microbiology RPAH	Foster et al
Australia/NSW-R0118/2021	EPI_ISL_1184095	2021-03-02	New South Wales Health Pathology Royal Prince Alfred Hospital	Microbiology RPAH	Foster et al
Australia/NSW-R0119/2021	EPI_ISL_1184096	2021-03-02	New South Wales Health Pathology Royal Prince Alfred Hospital	Microbiology RPAH	Foster et al
Australia/NSW-R0120/2021	EPI_ISL_1184097	2021-03-03	New South Wales Health Pathology Royal Prince Alfred Hospital	Microbiology RPAH	Foster et al
Australia/NSW-R0121/2021	EPI_ISL_1184098	2021-03-03	New South Wales Health Pathology Royal Prince Alfred Hospital	Microbiology RPAH	Foster et al
Australia/NSW-R0129/2021	EPI_ISL_1184094	2021-03-01	New South Wales Health Pathology Royal Prince Alfred Hospital	Microbiology RPAH	Foster et al
Australia/NSW-SAViD-2751/2020	EPI_ISL_537286	2020-09-08	Area of Virology, Serology and Virology Division (SAViD), New South Wales Health Pathology Randwick	Area of Virology, Serology and Virology Division (SAViD), New South Wales Health Pathology Randwick	Rawlinson et al
Australia/NSW-SAViD-2752/2020	EPI_ISL_537287	2020-09-09	Area of Virology, Serology and Virology Division (SAViD), New South Wales Health Pathology Randwick	Area of Virology, Serology and Virology Division (SAViD), New South Wales Health Pathology Randwick	Rawlinson et al
Australia/NSW01/2020	EPI_ISL_407893	2020-01-24	Centre for Infectious Diseases and Microbiology Laboratory Services	NSW Health Pathology - Institute of Clinical Pathology and Medical Research; Westmead Hospital; University of Sydney	Eden J-S et al
Australia/NSW02/2020	EPI_ISL_408976	2020-01-22	Centre for Infectious Diseases and Microbiology Laboratory Services	NSW Health Pathology - Institute of Clinical Pathology and Medical Research; Westmead Hospital; University of Sydney	Rockett R et al
Australia/NSW03/2020	EPI_ISL_408977	2020-01-25	Serology, Virology and OTDS Laboratories (SAViD), NSW Health Pathology Randwick	NSW Health Pathology - Institute of Clinical Pathology and Medical Research; Centre for Infectious Diseases and Microbiology Laboratory Services; Westmead Hospital; University of Sydney	Eden J-S et al
Australia/NSW04/2020	EPI_ISL_417030	2020-01-24	Centre for Infectious Diseases and Microbiology Laboratory Services	NSW Health Pathology - Institute of Clinical Pathology and Medical Research; Westmead Hospital; University of Sydney	Eden J-S et al
Australia/NSW05/2020	EPI_ISL_412975	2020-02-28	Centre for Infectious Diseases and Microbiology Laboratory Services	NSW Health Pathology - Institute of Clinical Pathology and Medical Research; Westmead Hospital; University of Sydney	Eden J-S et al
Australia/NSW06/2020	EPI_ISL_413213	2020-02-29	Centre for Infectious Diseases and Microbiology Laboratory Services	NSW Health Pathology - Institute of Clinical Pathology and Medical Research; Westmead Hospital; University of Sydney	Eden J-S et al
Australia/NSW07/2020	EPI_ISL_413214	2020-02-29	Centre for Infectious Diseases and Microbiology Laboratory Services	NSW Health Pathology - Institute of Clinical Pathology and Medical Research; Westmead Hospital; University of Sydney	Eden J-S et al
Australia/NSW08/2020	EPI_ISL_413594	2020-02-28	Centre for Infectious Diseases and Microbiology Laboratory Services	NSW Health Pathology - Institute of Clinical Pathology and Medical Research; Westmead Hospital; University of Sydney	Rockett R et al
Australia/NSW09/2020	EPI_ISL_413595	2020-02-28	Centre for Infectious Diseases and Microbiology Laboratory Services	NSW Health Pathology - Institute of Clinical Pathology and Medical Research; Westmead Hospital; University of Sydney	Rockett R et al
Australia/NSW10/2020	EPI_ISL_413596	2020-02-28	Centre for Infectious Diseases and Microbiology - Public Health	NSW Health Pathology - Institute of Clinical Pathology and Medical Research; Westmead Hospital; University of Sydney	Rockett R et al
Australia/NSW100/2020	EPI_ISL_427722	2020-03-19	Centre for Infectious Diseases and Microbiology Public Health	NSW Health Pathology - Institute of Clinical Pathology and Medical Research; Westmead Hospital; University of Sydney	Draper J et al
Australia/NSW1000/2020	EPI_ISL_591512	2020-10-07	Sydney South West Pathology Service (SSWPS) - Liverpool Hospital - NSW Health Pathology	NSW Health Pathology - Institute of Clinical Pathology and Medical Research; Westmead Hospital; University of Sydney	CIDM-PH et al. et al
Australia/NSW1001/2020	EPI_ISL_591505	2020-10-08	St Vincent's Pathology (SydPath)	NSW Health Pathology - Institute of Clinical Pathology and Medical Research; Westmead Hospital; University of Sydney	CIDM-PH et al. et al
Australia/NSW1002/2020	EPI_ISL_591506	2020-10-08	St Vincent's Pathology (SydPath)	NSW Health Pathology - Institute of Clinical Pathology and Medical Research; Westmead Hospital; University of Sydney	CIDM-PH et al. et al
Australia/NSW1003/2020	EPI_ISL_591492	2020-10-10	Medlab Pathology	NSW Health Pathology - Institute of Clinical Pathology and Medical Research; Westmead Hospital; University of Sydney	CIDM-PH et al. et al
Australia/NSW1004/2020	EPI_ISL_591500	2020-10-11	Pathology West - NSW Health Pathology	NSW Health Pathology - Institute of Clinical Pathology and Medical Research; Westmead Hospital; University of Sydney	CIDM-PH et al. et al
Australia/NSW1005/2020	EPI_ISL_591501	2020-10-12	Pathology West - NSW Health Pathology	NSW Health Pathology - Institute of Clinical Pathology and Medical Research; Westmead Hospital; University of Sydney	CIDM-PH et al. et al
Australia/NSW1006/2020	EPI_ISL_591513	2020-10-11	Sydney South West Pathology Service (SSWPS) - Liverpool Hospital - NSW Health Pathology	NSW Health Pathology - Institute of Clinical Pathology and Medical Research; Westmead Hospital; University of Sydney	CIDM-PH et al. et al
Australia/NSW1007/2020	EPI_ISL_591514	2020-10-11	Sydney South West Pathology Service (SSWPS) - Liverpool Hospital - NSW Health Pathology	NSW Health Pathology - Institute of Clinical Pathology and Medical Research; Westmead Hospital; University of Sydney	CIDM-PH et al. et al
Australia/NSW1008/2020	EPI_ISL_591515	2020-10-11	Sydney South West Pathology Service (SSWPS) - Liverpool Hospital - NSW Health Pathology	NSW Health Pathology - Institute of Clinical Pathology and Medical Research; Westmead Hospital; University of Sydney	CIDM-PH et al. et al
Australia/NSW1009/2020	EPI_ISL_591489	2020-10-12	Laverty Pathology	NSW Health Pathology - Institute of Clinical Pathology and Medical Research; Westmead Hospital; University of Sydney	CIDM-PH et al. et al
Australia/NSW101/2020	EPI_ISL_427717	2020-03-16	ACT Pathology, The Canberra Hospital	NSW Health Pathology - Institute of Clinical Pathology and Medical Research; Westmead Hospital; University of Sydney	Sim E et al
Australia/NSW1010/2020	EPI_ISL_591490	2020-10-12	Laverty Pathology	NSW Health Pathology - Institute of Clinical Pathology and Medical Research; Westmead Hospital; University of Sydney	CIDM-PH et al. et al
Australia/NSW1011/2020	EPI_ISL_591491	2020-10-12	Laverty Pathology	NSW Health Pathology - Institute of Clinical Pathology and Medical Research; Westmead Hospital; University of Sydney	CIDM-PH et al. et al
Australia/NSW1012/2020	EPI_ISL_591485	2020-10-12	Histopath	NSW Health Pathology - Institute of Clinical Pathology and Medical Research; Westmead Hospital; University of Sydney	CIDM-PH et al. et al
Australia/NSW1013/2020	EPI_ISL_591516	2020-10-14	Sydney South West Pathology Service (SSWPS) - Liverpool Hospital - NSW Health Pathology	NSW Health Pathology - Institute of Clinical Pathology and Medical Research; Westmead Hospital; University of Sydney	CIDM-PH et al. et al
Australia/NSW1014/2020	EPI_ISL_591486	2020-10-13	Histopath	NSW Health Pathology - Institute of Clinical Pathology and Medical Research; Westmead Hospital; University of Sydney	CIDM-PH et al. et al
Australia/NSW1015/2020	EPI_ISL_593660	2020-03-22	Pathology West - NSW Health Pathology	NSW Health Pathology - Institute of Clinical Pathology and Medical Research; Westmead Hospital; University of Sydney	CIDM-PH et al. et al
Australia/NSW1016/2020	EPI_ISL_593661	2020-03-26	Pathology West - NSW Health Pathology	NSW Health Pathology - Institute of Clinical Pathology and Medical Research; Westmead Hospital; University of Sydney	CIDM-PH et al. et al
Australia/NSW1017/2020	EPI_ISL_593662	2020-03-25	Pathology West - NSW Health Pathology	NSW Health Pathology - Institute of Clinical Pathology and Medical Research; Westmead Hospital; University of Sydney	CIDM-PH et al. et al
Australia/NSW1018/2020	EPI_ISL_593663	2020-03-28	Pathology West - NSW Health Pathology	NSW Health Pathology - Institute of Clinical Pathology and Medical Research; Westmead Hospital; University of Sydney	CIDM-PH et al. et al
Australia/NSW1019/2020	EPI_ISL_593664	2020-03-29	Pathology West - NSW Health Pathology	NSW Health Pathology - Institute of Clinical Pathology and Medical Research; Westmead Hospital; University of Sydney	CIDM-PH et al. et al
Australia/NSW102/2020	EPI_ISL_427656	2020-03-11	Centre for Infectious Diseases and Microbiology Public Health	NSW Health Pathology - Institute of Clinical Pathology and Medical Research; Westmead Hospital; University of Sydney	Bachmann N et al
Australia/NSW1020/2020	EPI_ISL_593665	2020-03-26	Pathology West - NSW Health Pathology	NSW Health Pathology - Institute of Clinical Pathology and Medical Research; Westmead Hospital; University of Sydney	CIDM-PH et al. et al
Australia/NSW1021/2020	EPI_ISL_593666	2020-03-26	Pathology West - NSW Health Pathology	NSW Health Pathology - Institute of Clinical Pathology and Medical Research; Westmead Hospital; University of Sydney	CIDM-PH et al. et al
Australia/NSW1023/2020	EPI_ISL_593667	2020-04-28	Pathology West - NSW Health Pathology	NSW Health Pathology - Institute of Clinical Pathology and Medical Research; Westmead Hospital; University of Sydney	CIDM-PH et al. et al
Australia/NSW1024/2020	EPI_ISL_593755	2020-03-27	Sydney South West Pathology Service (SSWPS) - Liverpool Hospital - NSW Health Pathology	NSW Health Pathology - Institute of Clinical Pathology and Medical Research; Westmead Hospital; University of Sydney	CIDM-PH et al. et al
Australia/NSW1025/2020	EPI_ISL_699641	2020-04-01	Sydney South West Pathology Service (SSWPS) - Liverpool Hospital - NSW Health Pathology	NSW Health Pathology - Institute of Clinical Pathology and Medical Research; Westmead Hospital; University of Sydney	CIDM-PH et al. et al
Australia/NSW1026/2020	EPI_ISL_593683	2020-03-26	South Eastern Area Laboratory Services (SEALS)	NSW Health Pathology - Institute of Clinical Pathology and Medical Research; Westmead Hospital; University of Sydney	CIDM-PH et al. et al
Australia/NSW1027/2020	EPI_ISL_593756	2020-03-15	Sydney South West Pathology Service (SSWPS) - Liverpool Hospital - NSW Health Pathology	NSW Health Pathology - Institute of Clinical Pathology and Medical Research; Westmead Hospital; University of Sydney	CIDM-PH et al. et al
Australia/NSW1028/2020	EPI_ISL_593757	2020-03-16	Sydney South West Pathology Service (SSWPS) - Liverpool Hospital - NSW Health Pathology	NSW Health Pathology - Institute of Clinical Pathology and Medical Research; Westmead Hospital; University of Sydney	CIDM-PH et al. et al
Australia/NSW1029/2020	EPI_ISL_593758	2020-03-18	Sydney South West Pathology Service (SSWPS) - Liverpool Hospital - NSW Health Pathology	NSW Health Pathology - Institute of Clinical Pathology and Medical Research; Westmead Hospital; University of Sydney	CIDM-PH et al. et al
Australia/NSW103/2020	EPI_ISL_427657	2020-03-10	Centre for Infectious Diseases and Microbiology Public Health	NSW Health Pathology - Institute of Clinical Pathology and Medical Research; Westmead Hospital; University of Sydney	Rockett R et al
Australia/NSW1030/2020	EPI_ISL_593759	2020-03-18	Sydney South West Pathology Service (SSWPS) - Liverpool Hospital - NSW Health Pathology	NSW Health Pathology - Institute of Clinical Pathology and Medical Research; Westmead Hospital; University of Sydney	CIDM-PH et al. et al
Australia/NSW1031/2020	EPI_ISL_593668	2020-07-07	Pathology West - NSW Health Pathology	NSW Health Pathology - Institute of Clinical Pathology and Medical Research; Westmead Hospital; University of Sydney	CIDM-PH et al. et al
Australia/NSW1032/2020	EPI_ISL_593684	2020-06-24	South Eastern Area Laboratory Services (SEALS)	NSW Health Pathology - Institute of Clinical Pathology and Medical Research; Westmead Hospital; University of Sydney	CIDM-PH et al. et al
Australia/NSW1033/2020	EPI_ISL_593685	2020-06-26	South Eastern Area Laboratory Services (SEALS)	NSW Health Pathology - Institute of Clinical Pathology and Medical Research; Westmead Hospital; University of Sydney	CIDM-PH et al. et al
Australia/NSW1034/2020	EPI_ISL_593686	2020-06-16	South Eastern Area Laboratory Services (SEALS)	NSW Health Pathology - Institute of Clinical Pathology and Medical Research; Westmead Hospital; University of Sydney	CIDM-PH et al. et al
Australia/NSW1035/2020	EPI_ISL_593687	2020-07-02	South Eastern Area Laboratory Services (SEALS)	NSW Health Pathology - Institute of Clinical Pathology and Medical Research; Westmead Hospital; University of Sydney	CIDM-PH et al. et al
Australia/NSW1036/2020	EPI_ISL_593688	2020-07-02	South Eastern Area Laboratory Services (SEALS)	NSW Health Pathology - Institute of Clinical Pathology and Medical Research; Westmead Hospital; University of Sydney	CIDM-PH et al. et al
Australia/NSW1037/2020	EPI_ISL_593689	2020-06-30	South Eastern Area Laboratory Services (SEALS)	NSW Health Pathology - Institute of Clinical Pathology and Medical Research; Westmead Hospital; University of Sydney	CIDM-PH et al. et al
Australia/NSW1038/2020	EPI_ISL_593690	2020-06-28	South Eastern Area Laboratory Services (SEALS)	NSW Health Pathology - Institute of Clinical Pathology and Medical Research; Westmead Hospital; University of Sydney	CIDM-PH et al. et al
Australia/NSW1039/2020	EPI_ISL_593691	2020-06-30	South Eastern Area Laboratory Services (SEALS)	NSW Health Pathology - Institute of Clinical Pathology and Medical Research; Westmead Hospital; University of Sydney	CIDM-PH et al. et al
Australia/NSW104/2020	EPI_ISL_427677	2020-03-16	Centre for Infectious Diseases and Microbiology Public Health	NSW Health Pathology - Institute of Clinical Pathology and Medical Research; Westmead Hospital; University of Sydney	Lam C et al
Australia/NSW1040/2020	EPI_ISL_593692	2020-06-29	South Eastern Area Laboratory Services (SEALS)	NSW Health Pathology - Institute of Clinical Pathology and Medical Research; Westmead Hospital; University of Sydney	CIDM-PH et al. et al
Australia/NSW1041/2020	EPI_ISL_593693	2020-06-29	South Eastern Area Laboratory Services (SEALS)	NSW Health Pathology - Institute of Clinical Pathology and Medical Research; Westmead Hospital; University of Sydney	CIDM-PH et al. et al
Australia/NSW1042/2020	EPI_ISL_593694	2020-07-04	South Eastern Area Laboratory Services (SEALS)	NSW Health Pathology - Institute of Clinical Pathology and Medical Research; Westmead Hospital; University of Sydney	CIDM-PH et al. et al
Australia/NSW1043/2020	EPI_ISL_593695	2020-07-04	South Eastern Area Laboratory Services (SEALS)	NSW Health Pathology - Institute of Clinical Pathology and Medical Research; Westmead Hospital; University of Sydney	CIDM-PH et al. et al
Australia/NSW1044/2020	EPI_ISL_593696	2020-07-04	South Eastern Area Laboratory Services (SEALS)	NSW Health Pathology - Institute of Clinical Pathology and Medical Research; Westmead Hospital; University of Sydney	CIDM-PH et al. et al
Australia/NSW1045/2020	EPI_ISL_593697	2020-07-04	South Eastern Area Laboratory Services (SEALS)	NSW Health Pathology - Institute of Clinical Pathology and Medical Research; Westmead Hospital; University of Sydney	CIDM-PH et al. et al
Australia/NSW1046/2020	EPI_ISL_593698	2020-07-04	South Eastern Area Laboratory Services (SEALS)	NSW Health Pathology - Institute of Clinical Pathology and Medical Research; Westmead Hospital; University of Sydney	CIDM-PH et al. et al
Australia/NSW1047/2020	EPI_ISL_593699	2020-07-08	South Eastern Area Laboratory Services (SEALS)	NSW Health Pathology - Institute of Clinical Pathology and Medical Research; Westmead Hospital; University of Sydney	CIDM-PH et al. et al
Australia/NSW1048/2020	EPI_ISL_593700	2020-07-05	South Eastern Area Laboratory Services (SEALS)	NSW Health Pathology - Institute of Clinical Pathology and Medical Research; Westmead Hospital; University of Sydney	CIDM-PH et al. et al
Australia/NSW1049/2020	EPI_ISL_593701	2020-07-04	South Eastern Area Laboratory Services (SEALS)	NSW Health Pathology - Institute of Clinical Pathology and Medical Research; Westmead Hospital; University of Sydney	CIDM-PH et al. et al
Australia/NSW105/2020	EPI_ISL_427686	2020-03-23	Centre for Infectious Diseases and Microbiology Public Health	NSW Health Pathology - Institute of Clinical Pathology and Medical Research; Westmead Hospital; University of Sydney	Gray K et al
Australia/NSW1050/2020	EPI_ISL_593702	2020-07-08	South Eastern Area Laboratory Services (SEALS)	NSW Health Pathology - Institute of Clinical Pathology and Medical Research; Westmead Hospital; University of Sydney	CIDM-PH et al. et al
Australia/NSW1051/2020	EPI_ISL_593703	2020-07-08	South Eastern Area Laboratory Services (SEALS)	NSW Health Pathology - Institute of Clinical Pathology and Medical Research; Westmead Hospital; University of Sydney	CIDM-PH et al. et al
Australia/NSW1052/2020	EPI_ISL_593704	2020-07-12	South Eastern Area Laboratory Services (SEALS)	NSW Health Pathology - Institute of Clinical Pathology and Medical Research; Westmead Hospital; University of Sydney	CIDM-PH et al. et al
Australia/NSW1053/2020	EPI_ISL_593705	2020-07-11	South Eastern Area Laboratory Services (SEALS)	NSW Health Pathology - Institute of Clinical Pathology and Medical Research; Westmead Hospital; University of Sydney	CIDM-PH et al. et al
Australia/NSW1054/2020	EPI_ISL_593706	2020-07-09	South Eastern Area Laboratory Services (SEALS)	NSW Health Pathology - Institute of Clinical Pathology and Medical Research; Westmead Hospital; University of Sydney	CIDM-PH et al. et al
Australia/NSW1055/2020	EPI_ISL_593707	2020-07-07	South Eastern Area Laboratory Services (SEALS)	NSW Health Pathology - Institute of Clinical Pathology and Medical Research; Westmead Hospital; University of Sydney	CIDM-PH et al. et al
Australia/NSW1056/2020	EPI_ISL_593655	2020-07-12	Pathology North - Hunter - NSW Health Pathology	NSW Health Pathology - Institute of Clinical Pathology and Medical Research; Westmead Hospital; University of Sydney	CIDM-PH et al. et al
Australia/NSW1057/2020	EPI_ISL_593669	2020-07-13	Pathology West - NSW Health Pathology	NSW Health Pathology - Institute of Clinical Pathology and Medical Research; Westmead Hospital; University of Sydney	CIDM-PH et al. et al
Australia/NSW1058/2020	EPI_ISL_593646	2020-07-14	4Cyte Pathology	NSW Health Pathology - Institute of Clinical Pathology and Medical Research; Westmead Hospital; University of Sydney	CIDM-PH et al. et al
Australia/NSW1059/2020	EPI_ISL_593670	2020-07-19	Pathology West - NSW Health Pathology	NSW Health Pathology - Institute of Clinical Pathology and Medical Research; Westmead Hospital; University of Sydney	CIDM-PH et al. et al
Australia/NSW106/2020	EPI_ISL_427748	2020-03-25	Centre for Infectious Diseases and Microbiology Public Health	NSW Health Pathology - Institute of Clinical Pathology and Medical Research; Westmead Hospital; University of Sydney	Timms V et al
Australia/NSW1060/2020	EPI_ISL_593649	2020-07-20	Austech Medical Laboratories	NSW Health Pathology - Institute of Clinical Pathology and Medical Research; Westmead Hospital; University of Sydney	CIDM-PH et al. et al
Australia/NSW1061/2020	EPI_ISL_593650	2020-07-17	Douglass Hanly Moir Pathology	NSW Health Pathology - Institute of Clinical Pathology and Medical Research; Westmead Hospital; University of Sydney	CIDM-PH et al. et al
Australia/NSW1062/2020	EPI_ISL_593671	2020-07-28	Pathology West - NSW Health Pathology	NSW Health Pathology - Institute of Clinical Pathology and Medical Research; Westmead Hospital; University of Sydney	CIDM-PH et al. et al
Australia/NSW1063/2020	EPI_ISL_593672	2020-07-30	Pathology West - NSW Health Pathology	NSW Health Pathology - Institute of Clinical Pathology and Medical Research; Westmead Hospital; University of Sydney	CIDM-PH et al. et al
Australia/NSW1064/2020	EPI_ISL_593760	2020-07-25	Sydney South West Pathology Service (SSWPS) - Liverpool Hospital - NSW Health Pathology	NSW Health Pathology - Institute of Clinical Pathology and Medical Research; Westmead Hospital; University of Sydney	CIDM-PH et al. et al
Australia/NSW1065/2020	EPI_ISL_593673	2020-08-02	Pathology West - NSW Health Pathology	NSW Health Pathology - Institute of Clinical Pathology and Medical Research; Westmead Hospital; University of Sydney	CIDM-PH et al. et al
Australia/NSW1066/2020	EPI_ISL_593674	2020-08-02	Pathology West - NSW Health Pathology	NSW Health Pathology - Institute of Clinical Pathology and Medical Research; Westmead Hospital; University of Sydney	CIDM-PH et al. et al
Australia/NSW1067/2020	EPI_ISL_593675	2020-08-02	Pathology West - NSW Health Pathology	NSW Health Pathology - Institute of Clinical Pathology and Medical Research; Westmead Hospital; University of Sydney	CIDM-PH et al. et al
Australia/NSW1068/2020	EPI_ISL_593708	2020-08-01	South Eastern Area Laboratory Services (SEALS)	NSW Health Pathology - Institute of Clinical Pathology and Medical Research; Westmead Hospital; University of Sydney	CIDM-PH et al. et al
Australia/NSW1069/2020	EPI_ISL_593709	2020-07-16	South Eastern Area Laboratory Services (SEALS)	NSW Health Pathology - Institute of Clinical Pathology and Medical Research; Westmead Hospital; University of Sydney	CIDM-PH et al. et al
Australia/NSW107/2020	EPI_ISL_427772	2020-03-26	Centre for Infectious Diseases and Microbiology Public Health	NSW Health Pathology - Institute of Clinical Pathology and Medical Research; Westmead Hospital; University of Sydney	Gall M et al
Australia/NSW1070/2020	EPI_ISL_593656	2020-08-04	Pathology North - Hunter - NSW Health Pathology	NSW Health Pathology - Institute of Clinical Pathology and Medical Research; Westmead Hospital; University of Sydney	CIDM-PH et al. et al
Australia/NSW1071/2020	EPI_ISL_593659	2020-08-09	Pathology North - Royal North Shore Hospital - NSW Health Pathology	NSW Health Pathology - Institute of Clinical Pathology and Medical Research; Westmead Hospital; University of Sydney	CIDM-PH et al. et al
Australia/NSW1072/2020	EPI_ISL_593657	2020-08-08	Pathology North - Hunter - NSW Health Pathology	NSW Health Pathology - Institute of Clinical Pathology and Medical Research; Westmead Hospital; University of Sydney	CIDM-PH et al. et al
Australia/NSW1073/2020	EPI_ISL_593761	2020-08-06	Sydney South West Pathology Service (SSWPS) - Liverpool Hospital - NSW Health Pathology	NSW Health Pathology - Institute of Clinical Pathology and Medical Research; Westmead Hospital; University of Sydney	CIDM-PH et al. et al
Australia/NSW1074/2020	EPI_ISL_593676	2020-08-10	Pathology West - NSW Health Pathology	NSW Health Pathology - Institute of Clinical Pathology and Medical Research; Westmead Hospital; University of Sydney	CIDM-PH et al. et al
Australia/NSW1075/2020	EPI_ISL_593677	2020-08-10	Pathology West - NSW Health Pathology	NSW Health Pathology - Institute of Clinical Pathology and Medical Research; Westmead Hospital; University of Sydney	CIDM-PH et al. et al
Australia/NSW1076/2020	EPI_ISL_593710	2020-08-04	South Eastern Area Laboratory Services (SEALS)	NSW Health Pathology - Institute of Clinical Pathology and Medical Research; Westmead Hospital; University of Sydney	CIDM-PH et al. et al
Australia/NSW1077/2020	EPI_ISL_593711	2020-07-31	South Eastern Area Laboratory Services (SEALS)	NSW Health Pathology - Institute of Clinical Pathology and Medical Research; Westmead Hospital; University of Sydney	CIDM-PH et al. et al
Australia/NSW1078/2020	EPI_ISL_593767	2020-08-11	Sydney South West Pathology Service (SSWPS) - Royal Prince Alfred Hospital - NSW Health Pathology	NSW Health Pathology - Institute of Clinical Pathology and Medical Research; Westmead Hospital; University of Sydney	CIDM-PH et al. et al
Australia/NSW1079/2020	EPI_ISL_593654	2020-08-14	Medlab Pathology	NSW Health Pathology - Institute of Clinical Pathology and Medical Research; Westmead Hospital; University of Sydney	CIDM-PH et al. et al
Australia/NSW108/2020	EPI_ISL_427804	2020-03-19	Centre for Infectious Diseases and Microbiology Public Health	NSW Health Pathology - Institute of Clinical Pathology and Medical Research; Westmead Hospital; University of Sydney	Arnott A et al
Australia/NSW1080/2020	EPI_ISL_593653	2020-08-10	Laverty Pathology	NSW Health Pathology - Institute of Clinical Pathology and Medical Research; Westmead Hospital; University of Sydney	CIDM-PH et al. et al
Australia/NSW1081/2020	EPI_ISL_593769	2020-08-08	The Children's Hospital at Westmead	NSW Health Pathology - Institute of Clinical Pathology and Medical Research; Westmead Hospital; University of Sydney	CIDM-PH et al. et al
Australia/NSW1082/2020	EPI_ISL_593678	2020-08-15	Pathology West - NSW Health Pathology	NSW Health Pathology - Institute of Clinical Pathology and Medical Research; Westmead Hospital; University of Sydney	CIDM-PH et al. et al
Australia/NSW1083/2020	EPI_ISL_593712	2020-08-08	South Eastern Area Laboratory Services (SEALS)	NSW Health Pathology - Institute of Clinical Pathology and Medical Research; Westmead Hospital; University of Sydney	CIDM-PH et al. et al
Australia/NSW1084/2020	EPI_ISL_593679	2020-08-14	Pathology West - NSW Health Pathology	NSW Health Pathology - Institute of Clinical Pathology and Medical Research; Westmead Hospital; University of Sydney	CIDM-PH et al. et al
Australia/NSW1085/2020	EPI_ISL_593680	2020-08-17	Pathology West - NSW Health Pathology	NSW Health Pathology - Institute of Clinical Pathology and Medical Research; Westmead Hospital; University of Sydney	CIDM-PH et al. et al
Australia/NSW1086/2020	EPI_ISL_593766	2020-08-08	Sydney South West Pathology Service (SSWPS) - Royal Prince Alfred Hospital - NSW Health Pathology	NSW Health Pathology - Institute of Clinical Pathology and Medical Research; Westmead Hospital; University of Sydney	CIDM-PH et al. et al
Australia/NSW1087/2020	EPI_ISL_593681	2020-08-19	Pathology West - NSW Health Pathology	NSW Health Pathology - Institute of Clinical Pathology and Medical Research; Westmead Hospital; University of Sydney	CIDM-PH et al. et al
Australia/NSW1088/2020	EPI_ISL_593651	2020-08-20	Douglass Hanly Moir Pathology	NSW Health Pathology - Institute of Clinical Pathology and Medical Research; Westmead Hospital; University of Sydney	CIDM-PH et al. et al
Australia/NSW1089/2020	EPI_ISL_593768	2020-08-19	Sydney South West Pathology Service (SSWPS) - Royal Prince Alfred Hospital - NSW Health Pathology	NSW Health Pathology - Institute of Clinical Pathology and Medical Research; Westmead Hospital; University of Sydney	CIDM-PH et al. et al
Australia/NSW109/2020	EPI_ISL_427754	2020-03-25	Centre for Infectious Diseases and Microbiology Public Health	NSW Health Pathology - Institute of Clinical Pathology and Medical Research; Westmead Hospital; University of Sydney	Sadsad R et al
Australia/NSW1090/2020	EPI_ISL_593762	2020-08-19	Sydney South West Pathology Service (SSWPS) - Liverpool Hospital - NSW Health Pathology	NSW Health Pathology - Institute of Clinical Pathology and Medical Research; Westmead Hospital; University of Sydney	CIDM-PH et al. et al
Australia/NSW1091/2020	EPI_ISL_593647	2020-08-24	4Cyte Pathology	NSW Health Pathology - Institute of Clinical Pathology and Medical Research; Westmead Hospital; University of Sydney	CIDM-PH et al. et al
Australia/NSW1092/2020	EPI_ISL_593648	2020-08-24	4Cyte Pathology	NSW Health Pathology - Institute of Clinical Pathology and Medical Research; Westmead Hospital; University of Sydney	CIDM-PH et al. et al
Australia/NSW1093/2020	EPI_ISL_593682	2020-08-26	Pathology West - NSW Health Pathology	NSW Health Pathology - Institute of Clinical Pathology and Medical Research; Westmead Hospital; University of Sydney	CIDM-PH et al. et al
Australia/NSW1094/2020	EPI_ISL_593763	2020-08-27	Sydney South West Pathology Service (SSWPS) - Liverpool Hospital - NSW Health Pathology	NSW Health Pathology - Institute of Clinical Pathology and Medical Research; Westmead Hospital; University of Sydney	CIDM-PH et al. et al
Australia/NSW1095/2020	EPI_ISL_593652	2020-08-29	Histopath	NSW Health Pathology - Institute of Clinical Pathology and Medical Research; Westmead Hospital; University of Sydney	CIDM-PH et al. et al
Australia/NSW1096/2020	EPI_ISL_593658	2020-08-30	Pathology North - Hunter - NSW Health Pathology	NSW Health Pathology - Institute of Clinical Pathology and Medical Research; Westmead Hospital; University of Sydney	CIDM-PH et al. et al
Australia/NSW1097/2020	EPI_ISL_593764	2020-09-03	Sydney South West Pathology Service (SSWPS) - Liverpool Hospital - NSW Health Pathology	NSW Health Pathology - Institute of Clinical Pathology and Medical Research; Westmead Hospital; University of Sydney	CIDM-PH et al. et al
Australia/NSW1098/2020	EPI_ISL_593713	2020-08-23	South Eastern Area Laboratory Services (SEALS)	NSW Health Pathology - Institute of Clinical Pathology and Medical Research; Westmead Hospital; University of Sydney	CIDM-PH et al. et al
Australia/NSW1099/2020	EPI_ISL_593714	2020-08-29	South Eastern Area Laboratory Services (SEALS)	NSW Health Pathology - Institute of Clinical Pathology and Medical Research; Westmead Hospital; University of Sydney	CIDM-PH et al. et al
Australia/NSW11/2020	EPI_ISL_413597	2020-03-02	Centre for Infectious Diseases and Microbiology- Public Health	NSW Health Pathology - Institute of Clinical Pathology and Medical Research; Westmead Hospital; University of Sydney	Lam C et al
Australia/NSW110/2020	EPI_ISL_427741	2020-03-21	Centre for Infectious Diseases and Microbiology Public Health	NSW Health Pathology - Institute of Clinical Pathology and Medical Research; Westmead Hospital; University of Sydney	Draper J et al
Australia/NSW1100/2020	EPI_ISL_593715	2020-08-29	South Eastern Area Laboratory Services (SEALS)	NSW Health Pathology - Institute of Clinical Pathology and Medical Research; Westmead Hospital; University of Sydney	CIDM-PH et al. et al
Australia/NSW1101/2020	EPI_ISL_593716	2020-08-29	South Eastern Area Laboratory Services (SEALS)	NSW Health Pathology - Institute of Clinical Pathology and Medical Research; Westmead Hospital; University of Sydney	CIDM-PH et al. et al
Australia/NSW1102/2020	EPI_ISL_593717	2020-08-29	South Eastern Area Laboratory Services (SEALS)	NSW Health Pathology - Institute of Clinical Pathology and Medical Research; Westmead Hospital; University of Sydney	CIDM-PH et al. et al
Australia/NSW1103/2020	EPI_ISL_593718	2020-08-31	South Eastern Area Laboratory Services (SEALS)	NSW Health Pathology - Institute of Clinical Pathology and Medical Research; Westmead Hospital; University of Sydney	CIDM-PH et al. et al
Australia/NSW1104/2020	EPI_ISL_593719	2020-08-22	South Eastern Area Laboratory Services (SEALS)	NSW Health Pathology - Institute of Clinical Pathology and Medical Research; Westmead Hospital; University of Sydney	CIDM-PH et al. et al
Australia/NSW1105/2020	EPI_ISL_593720	2020-06-06	South Eastern Area Laboratory Services (SEALS)	NSW Health Pathology - Institute of Clinical Pathology and Medical Research; Westmead Hospital; University of Sydney	CIDM-PH et al. et al
Australia/NSW1106/2020	EPI_ISL_593721	2020-08-20	South Eastern Area Laboratory Services (SEALS)	NSW Health Pathology - Institute of Clinical Pathology and Medical Research; Westmead Hospital; University of Sydney	CIDM-PH et al. et al
Australia/NSW1107/2020	EPI_ISL_593722	2020-08-11	South Eastern Area Laboratory Services (SEALS)	NSW Health Pathology - Institute of Clinical Pathology and Medical Research; Westmead Hospital; University of Sydney	CIDM-PH et al. et al
Australia/NSW1108/2020	EPI_ISL_593723	2020-08-11	South Eastern Area Laboratory Services (SEALS)	NSW Health Pathology - Institute of Clinical Pathology and Medical Research; Westmead Hospital; University of Sydney	CIDM-PH et al. et al
Australia/NSW1109/2020	EPI_ISL_593724	2020-08-15	South Eastern Area Laboratory Services (SEALS)	NSW Health Pathology - Institute of Clinical Pathology and Medical Research; Westmead Hospital; University of Sydney	CIDM-PH et al. et al
Australia/NSW111/2020	EPI_ISL_427661	2020-03-16	Centre for Infectious Diseases and Microbiology Public Health	NSW Health Pathology - Institute of Clinical Pathology and Medical Research; Westmead Hospital; University of Sydney	Sim E et al
Australia/NSW1110/2020	EPI_ISL_593725	2020-08-29	South Eastern Area Laboratory Services (SEALS)	NSW Health Pathology - Institute of Clinical Pathology and Medical Research; Westmead Hospital; University of Sydney	CIDM-PH et al. et al
Australia/NSW1111/2020	EPI_ISL_593726	2020-07-03	South Eastern Area Laboratory Services (SEALS)	NSW Health Pathology - Institute of Clinical Pathology and Medical Research; Westmead Hospital; University of Sydney	CIDM-PH et al. et al
Australia/NSW1112/2020	EPI_ISL_593727	2020-09-01	South Eastern Area Laboratory Services (SEALS)	NSW Health Pathology - Institute of Clinical Pathology and Medical Research; Westmead Hospital; University of Sydney	CIDM-PH et al. et al
Australia/NSW1113/2020	EPI_ISL_593728	2020-09-02	South Eastern Area Laboratory Services (SEALS)	NSW Health Pathology - Institute of Clinical Pathology and Medical Research; Westmead Hospital; University of Sydney	CIDM-PH et al. et al
Australia/NSW1114/2020	EPI_ISL_593770	2020-09-15	Pathology West - NSW Health Pathology	NSW Health Pathology - Institute of Clinical Pathology and Medical Research; Westmead Hospital; University of Sydney	CIDM-PH et al. et al
Australia/NSW1115/2020	EPI_ISL_593729	2020-09-15	South Eastern Area Laboratory Services (SEALS)	NSW Health Pathology - Institute of Clinical Pathology and Medical Research; Westmead Hospital; University of Sydney	CIDM-PH et al. et al
Australia/NSW1116/2020	EPI_ISL_593730	2020-09-15	South Eastern Area Laboratory Services (SEALS)	NSW Health Pathology - Institute of Clinical Pathology and Medical Research; Westmead Hospital; University of Sydney	CIDM-PH et al. et al
Australia/NSW1117/2020	EPI_ISL_593731	2020-09-15	South Eastern Area Laboratory Services (SEALS)	NSW Health Pathology - Institute of Clinical Pathology and Medical Research; Westmead Hospital; University of Sydney	CIDM-PH et al. et al
Australia/NSW1118/2020	EPI_ISL_593732	2020-09-12	South Eastern Area Laboratory Services (SEALS)	NSW Health Pathology - Institute of Clinical Pathology and Medical Research; Westmead Hospital; University of Sydney	CIDM-PH et al. et al
Australia/NSW1119/2020	EPI_ISL_593733	2020-09-12	South Eastern Area Laboratory Services (SEALS)	NSW Health Pathology - Institute of Clinical Pathology and Medical Research; Westmead Hospital; University of Sydney	CIDM-PH et al. et al
Australia/NSW112/2020	EPI_ISL_427666	2020-03-15	Centre for Infectious Diseases and Microbiology Public Health	NSW Health Pathology - Institute of Clinical Pathology and Medical Research; Westmead Hospital; University of Sydney	Bachmann N et al
Australia/NSW1120/2020	EPI_ISL_593734	2020-09-12	South Eastern Area Laboratory Services (SEALS)	NSW Health Pathology - Institute of Clinical Pathology and Medical Research; Westmead Hospital; University of Sydney	CIDM-PH et al. et al
Australia/NSW1121/2020	EPI_ISL_593735	2020-09-13	South Eastern Area Laboratory Services (SEALS)	NSW Health Pathology - Institute of Clinical Pathology and Medical Research; Westmead Hospital; University of Sydney	CIDM-PH et al. et al
Australia/NSW1122/2020	EPI_ISL_593736	2020-09-13	South Eastern Area Laboratory Services (SEALS)	NSW Health Pathology - Institute of Clinical Pathology and Medical Research; Westmead Hospital; University of Sydney	CIDM-PH et al. et al
Australia/NSW1123/2020	EPI_ISL_593737	2020-09-13	South Eastern Area Laboratory Services (SEALS)	NSW Health Pathology - Institute of Clinical Pathology and Medical Research; Westmead Hospital; University of Sydney	CIDM-PH et al. et al
Australia/NSW1124/2020	EPI_ISL_593738	2020-09-09	South Eastern Area Laboratory Services (SEALS)	NSW Health Pathology - Institute of Clinical Pathology and Medical Research; Westmead Hospital; University of Sydney	CIDM-PH et al. et al
Australia/NSW1125/2020	EPI_ISL_593739	2020-09-10	South Eastern Area Laboratory Services (SEALS)	NSW Health Pathology - Institute of Clinical Pathology and Medical Research; Westmead Hospital; University of Sydney	CIDM-PH et al. et al
Australia/NSW1126/2020	EPI_ISL_593740	2020-09-11	South Eastern Area Laboratory Services (SEALS)	NSW Health Pathology - Institute of Clinical Pathology and Medical Research; Westmead Hospital; University of Sydney	CIDM-PH et al. et al
Australia/NSW1127/2020	EPI_ISL_593741	2020-09-08	South Eastern Area Laboratory Services (SEALS)	NSW Health Pathology - Institute of Clinical Pathology and Medical Research; Westmead Hospital; University of Sydney	CIDM-PH et al. et al
Australia/NSW1128/2020	EPI_ISL_699642	2020-09-12	South Eastern Area Laboratory Services (SEALS)	NSW Health Pathology - Institute of Clinical Pathology and Medical Research; Westmead Hospital; University of Sydney	CIDM-PH et al. et al
Australia/NSW1129/2020	EPI_ISL_593742	2020-09-08	South Eastern Area Laboratory Services (SEALS)	NSW Health Pathology - Institute of Clinical Pathology and Medical Research; Westmead Hospital; University of Sydney	CIDM-PH et al. et al
Australia/NSW113/2020	EPI_ISL_427728	2020-03-17	Centre for Infectious Diseases and Microbiology Public Health	NSW Health Pathology - Institute of Clinical Pathology and Medical Research; Westmead Hospital; University of Sydney	Rockett R et al
Australia/NSW1130/2020	EPI_ISL_593743	2020-09-05	South Eastern Area Laboratory Services (SEALS)	NSW Health Pathology - Institute of Clinical Pathology and Medical Research; Westmead Hospital; University of Sydney	CIDM-PH et al. et al
Australia/NSW1131/2020	EPI_ISL_593765	2020-09-23	Sydney South West Pathology Service (SSWPS) - Liverpool Hospital - NSW Health Pathology	NSW Health Pathology - Institute of Clinical Pathology and Medical Research; Westmead Hospital; University of Sydney	CIDM-PH et al. et al
Australia/NSW1132/2020	EPI_ISL_593744	2020-09-29	South Eastern Area Laboratory Services (SEALS)	NSW Health Pathology - Institute of Clinical Pathology and Medical Research; Westmead Hospital; University of Sydney	CIDM-PH et al. et al
Australia/NSW1133/2020	EPI_ISL_593745	2020-10-04	South Eastern Area Laboratory Services (SEALS)	NSW Health Pathology - Institute of Clinical Pathology and Medical Research; Westmead Hospital; University of Sydney	CIDM-PH et al. et al
Australia/NSW1134/2020	EPI_ISL_593771	2020-04-09	South Eastern Area Laboratory Services (SEALS)	NSW Health Pathology - Institute of Clinical Pathology and Medical Research; Westmead Hospital; University of Sydney	CIDM-PH et al. et al
Australia/NSW1135/2020	EPI_ISL_593746	2020-04-27	South Eastern Area Laboratory Services (SEALS)	NSW Health Pathology - Institute of Clinical Pathology and Medical Research; Westmead Hospital; University of Sydney	CIDM-PH et al. et al
Australia/NSW1136/2020	EPI_ISL_593747	2020-04-27	South Eastern Area Laboratory Services (SEALS)	NSW Health Pathology - Institute of Clinical Pathology and Medical Research; Westmead Hospital; University of Sydney	CIDM-PH et al. et al
Australia/NSW1137/2020	EPI_ISL_593748	2020-07-27	South Eastern Area Laboratory Services (SEALS)	NSW Health Pathology - Institute of Clinical Pathology and Medical Research; Westmead Hospital; University of Sydney	CIDM-PH et al. et al
Australia/NSW1139/2020	EPI_ISL_593749	2020-06-16	South Eastern Area Laboratory Services (SEALS)	NSW Health Pathology - Institute of Clinical Pathology and Medical Research; Westmead Hospital; University of Sydney	CIDM-PH et al. et al
Australia/NSW114/2020	EPI_ISL_427724	2020-03-19	Centre for Infectious Diseases and Microbiology Public Health	NSW Health Pathology - Institute of Clinical Pathology and Medical Research; Westmead Hospital; University of Sydney	Lam C et al
Australia/NSW1140/2020	EPI_ISL_593750	2020-09-17	South Eastern Area Laboratory Services (SEALS)	NSW Health Pathology - Institute of Clinical Pathology and Medical Research; Westmead Hospital; University of Sydney	CIDM-PH et al. et al
Australia/NSW1141/2020	EPI_ISL_593751	2020-10-03	South Eastern Area Laboratory Services (SEALS)	NSW Health Pathology - Institute of Clinical Pathology and Medical Research; Westmead Hospital; University of Sydney	CIDM-PH et al. et al
Australia/NSW1142/2020	EPI_ISL_593752	2020-09-22	South Eastern Area Laboratory Services (SEALS)	NSW Health Pathology - Institute of Clinical Pathology and Medical Research; Westmead Hospital; University of Sydney	CIDM-PH et al. et al
Australia/NSW1143/2020	EPI_ISL_593753	2020-09-30	South Eastern Area Laboratory Services (SEALS)	NSW Health Pathology - Institute of Clinical Pathology and Medical Research; Westmead Hospital; University of Sydney	CIDM-PH et al. et al
Australia/NSW1145/2020	EPI_ISL_593754	2020-09-20	South Eastern Area Laboratory Services (SEALS)	NSW Health Pathology - Institute of Clinical Pathology and Medical Research; Westmead Hospital; University of Sydney	CIDM-PH et al. et al
Australia/NSW1146/2020	EPI_ISL_699643	2020-10-12	Medlab Pathology	NSW Health Pathology - Institute of Clinical Pathology and Medical Research; Westmead Hospital; University of Sydney	CIDM-PH et al. et al
Australia/NSW1148/2020	EPI_ISL_629001	2020-09-17	South Eastern Area Laboratory Services (SEALS)	NSW Health Pathology - Institute of Clinical Pathology and Medical Research; Westmead Hospital; University of Sydney	CIDM-PH et al. et al
Australia/NSW1149/2020	EPI_ISL_629002	2020-10-14	Sydney South West Pathology Service (SSWPS) - Liverpool Hospital - NSW Health Pathology	NSW Health Pathology - Institute of Clinical Pathology and Medical Research; Westmead Hospital; University of Sydney	CIDM-PH et al. et al
Australia/NSW115/2020	EPI_ISL_427696	2020-03-21	Centre for Infectious Diseases and Microbiology Public Health	NSW Health Pathology - Institute of Clinical Pathology and Medical Research; Westmead Hospital; University of Sydney	Gray K et al
Australia/NSW1150/2020	EPI_ISL_629003	2020-10-06	South Eastern Area Laboratory Services (SEALS)	NSW Health Pathology - Institute of Clinical Pathology and Medical Research; Westmead Hospital; University of Sydney	CIDM-PH et al. et al
Australia/NSW1151/2020	EPI_ISL_629004	2020-10-07	South Eastern Area Laboratory Services (SEALS)	NSW Health Pathology - Institute of Clinical Pathology and Medical Research; Westmead Hospital; University of Sydney	CIDM-PH et al. et al
Australia/NSW1152/2020	EPI_ISL_629005	2020-10-10	South Eastern Area Laboratory Services (SEALS)	NSW Health Pathology - Institute of Clinical Pathology and Medical Research; Westmead Hospital; University of Sydney	CIDM-PH et al. et al
Australia/NSW1153/2020	EPI_ISL_629006	2020-10-10	South Eastern Area Laboratory Services (SEALS)	NSW Health Pathology - Institute of Clinical Pathology and Medical Research; Westmead Hospital; University of Sydney	CIDM-PH et al. et al
Australia/NSW1154/2020	EPI_ISL_629007	2020-10-25	Laverty Pathology	NSW Health Pathology - Institute of Clinical Pathology and Medical Research; Westmead Hospital; University of Sydney	CIDM-PH et al. et al
Australia/NSW1155/2020	EPI_ISL_629008	2020-10-27	Laverty Pathology	NSW Health Pathology - Institute of Clinical Pathology and Medical Research; Westmead Hospital; University of Sydney	CIDM-PH et al. et al
Australia/NSW1156/2020	EPI_ISL_629009	2020-10-30	Laverty Pathology	NSW Health Pathology - Institute of Clinical Pathology and Medical Research; Westmead Hospital; University of Sydney	CIDM-PH et al. et al
Australia/NSW1157/2020	EPI_ISL_629010	2020-10-15	Sydney South West Pathology Service (SSWPS) - Royal Prince Alfred Hospital - NSW Health Pathology	NSW Health Pathology - Institute of Clinical Pathology and Medical Research; Westmead Hospital; University of Sydney	CIDM-PH et al. et al
Australia/NSW1158/2020	EPI_ISL_629029	2020-09-24	South Eastern Area Laboratory Services (SEALS)	NSW Health Pathology - Institute of Clinical Pathology and Medical Research; Westmead Hospital; University of Sydney	CIDM-PH et al. et al
Australia/NSW1159/2020	EPI_ISL_629030	2020-09-28	South Eastern Area Laboratory Services (SEALS)	NSW Health Pathology - Institute of Clinical Pathology and Medical Research; Westmead Hospital; University of Sydney	CIDM-PH et al. et al
Australia/NSW116/2020	EPI_ISL_427698	2020-03-21	Centre for Infectious Diseases and Microbiology Public Health	NSW Health Pathology - Institute of Clinical Pathology and Medical Research; Westmead Hospital; University of Sydney	Timms V et al
Australia/NSW1161/2020	EPI_ISL_639729	2020-08-02	Sydney South West Pathology Service (SSWPS) - Liverpool Hospital - NSW Health Pathology	NSW Health Pathology - Institute of Clinical Pathology and Medical Research; Westmead Hospital; University of Sydney	CIDM-PH et al. et al
Australia/NSW1162/2020	EPI_ISL_639730	2020-08-03	Sydney South West Pathology Service (SSWPS) - Liverpool Hospital - NSW Health Pathology	NSW Health Pathology - Institute of Clinical Pathology and Medical Research; Westmead Hospital; University of Sydney	CIDM-PH et al. et al
Australia/NSW1163/2020	EPI_ISL_639731	2020-10-07	Laverty Pathology	NSW Health Pathology - Institute of Clinical Pathology and Medical Research; Westmead Hospital; University of Sydney	CIDM-PH et al. et al
Australia/NSW1164/2020	EPI_ISL_639732	2020-10-18	Sydney South West Pathology Service (SSWPS) - Liverpool Hospital - NSW Health Pathology	NSW Health Pathology - Institute of Clinical Pathology and Medical Research; Westmead Hospital; University of Sydney	CIDM-PH et al. et al
Australia/NSW1165/2020	EPI_ISL_639733	2020-11-02	Laverty Pathology	NSW Health Pathology - Institute of Clinical Pathology and Medical Research; Westmead Hospital; University of Sydney	CIDM-PH et al. et al
Australia/NSW1166/2020	EPI_ISL_639734	2020-11-02	Sydney South West Pathology Service (SSWPS) - Liverpool Hospital - NSW Health Pathology	NSW Health Pathology - Institute of Clinical Pathology and Medical Research; Westmead Hospital; University of Sydney	CIDM-PH et al. et al
Australia/NSW1167/2020	EPI_ISL_639735	2020-11-02	Sydney South West Pathology Service (SSWPS) - Liverpool Hospital - NSW Health Pathology	NSW Health Pathology - Institute of Clinical Pathology and Medical Research; Westmead Hospital; University of Sydney	CIDM-PH et al. et al
Australia/NSW1168/2020	EPI_ISL_639736	2020-10-21	South Eastern Area Laboratory Services (SEALS)	NSW Health Pathology - Institute of Clinical Pathology and Medical Research; Westmead Hospital; University of Sydney	CIDM-PH et al. et al
Australia/NSW1169/2020	EPI_ISL_639737	2020-10-20	South Eastern Area Laboratory Services (SEALS)	NSW Health Pathology - Institute of Clinical Pathology and Medical Research; Westmead Hospital; University of Sydney	CIDM-PH et al. et al
Australia/NSW117/2020	EPI_ISL_427756	2020-03-24	Centre for Infectious Diseases and Microbiology Public Health	NSW Health Pathology - Institute of Clinical Pathology and Medical Research; Westmead Hospital; University of Sydney	Gall M et al
Australia/NSW1170/2020	EPI_ISL_639738	2020-10-26	South Eastern Area Laboratory Services (SEALS)	NSW Health Pathology - Institute of Clinical Pathology and Medical Research; Westmead Hospital; University of Sydney	CIDM-PH et al. et al
Australia/NSW1172/2020	EPI_ISL_667777	2020-08-31	Pathology West - NSW Health Pathology	NSW Health Pathology - Institute of Clinical Pathology and Medical Research; Westmead Hospital; University of Sydney	CIDM-PH et al. et al
Australia/NSW1173/2020	EPI_ISL_667778	2020-10-28	Sydney South West Pathology Service (SSWPS) - Royal Prince Alfred Hospital - NSW Health Pathology	NSW Health Pathology - Institute of Clinical Pathology and Medical Research; Westmead Hospital; University of Sydney	CIDM-PH et al. et al
Australia/NSW1174/2020	EPI_ISL_667779	2020-10-16	South Eastern Area Laboratory Services (SEALS)	NSW Health Pathology - Institute of Clinical Pathology and Medical Research; Westmead Hospital; University of Sydney	CIDM-PH et al. et al
Australia/NSW1176/2020	EPI_ISL_667780	2020-11-01	South Eastern Area Laboratory Services (SEALS)	NSW Health Pathology - Institute of Clinical Pathology and Medical Research; Westmead Hospital; University of Sydney	CIDM-PH et al. et al
Australia/NSW1177/2020	EPI_ISL_667781	2020-11-02	South Eastern Area Laboratory Services (SEALS)	NSW Health Pathology - Institute of Clinical Pathology and Medical Research; Westmead Hospital; University of Sydney	CIDM-PH et al. et al
Australia/NSW1178/2020	EPI_ISL_667782	2020-10-24	South Eastern Area Laboratory Services (SEALS)	NSW Health Pathology - Institute of Clinical Pathology and Medical Research; Westmead Hospital; University of Sydney	CIDM-PH et al. et al
Australia/NSW118/2020	EPI_ISL_427693	2020-03-22	Centre for Infectious Diseases and Microbiology Public Health	NSW Health Pathology - Institute of Clinical Pathology and Medical Research; Westmead Hospital; University of Sydney	Arnott A et al
Australia/NSW1180/2020	EPI_ISL_667783	2020-10-26	South Eastern Area Laboratory Services (SEALS)	NSW Health Pathology - Institute of Clinical Pathology and Medical Research; Westmead Hospital; University of Sydney	CIDM-PH et al. et al
Australia/NSW1181/2020	EPI_ISL_667784	2020-10-22	South Eastern Area Laboratory Services (SEALS)	NSW Health Pathology - Institute of Clinical Pathology and Medical Research; Westmead Hospital; University of Sydney	CIDM-PH et al. et al
Australia/NSW1182/2020	EPI_ISL_667785	2020-10-22	South Eastern Area Laboratory Services (SEALS)	NSW Health Pathology - Institute of Clinical Pathology and Medical Research; Westmead Hospital; University of Sydney	CIDM-PH et al. et al
Australia/NSW1184/2020	EPI_ISL_667786	2020-10-24	South Eastern Area Laboratory Services (SEALS)	NSW Health Pathology - Institute of Clinical Pathology and Medical Research; Westmead Hospital; University of Sydney	CIDM-PH et al. et al
Australia/NSW1186/2020	EPI_ISL_667787	2020-10-21	South Eastern Area Laboratory Services (SEALS)	NSW Health Pathology - Institute of Clinical Pathology and Medical Research; Westmead Hospital; University of Sydney	CIDM-PH et al. et al
Australia/NSW1187/2020	EPI_ISL_667788	2020-10-30	South Eastern Area Laboratory Services (SEALS)	NSW Health Pathology - Institute of Clinical Pathology and Medical Research; Westmead Hospital; University of Sydney	CIDM-PH et al. et al
Australia/NSW1188/2020	EPI_ISL_667789	2020-10-28	South Eastern Area Laboratory Services (SEALS)	NSW Health Pathology - Institute of Clinical Pathology and Medical Research; Westmead Hospital; University of Sydney	CIDM-PH et al. et al
Australia/NSW1189/2020	EPI_ISL_667790	2020-10-30	South Eastern Area Laboratory Services (SEALS)	NSW Health Pathology - Institute of Clinical Pathology and Medical Research; Westmead Hospital; University of Sydney	CIDM-PH et al. et al
Australia/NSW119/2020	EPI_ISL_427669	2020-03-22	Centre for Infectious Diseases and Microbiology Public Health	NSW Health Pathology - Institute of Clinical Pathology and Medical Research; Westmead Hospital; University of Sydney	Sadsad R et al
Australia/NSW1190/2020	EPI_ISL_667791	2020-10-25	South Eastern Area Laboratory Services (SEALS)	NSW Health Pathology - Institute of Clinical Pathology and Medical Research; Westmead Hospital; University of Sydney	CIDM-PH et al. et al
Australia/NSW1191/2020	EPI_ISL_671673	2020-10-21	South Eastern Area Laboratory Services (SEALS)	NSW Health Pathology - Institute of Clinical Pathology and Medical Research; Westmead Hospital; University of Sydney	CIDM-PH et al. et al
Australia/NSW1192/2020	EPI_ISL_667792	2020-10-21	South Eastern Area Laboratory Services (SEALS)	NSW Health Pathology - Institute of Clinical Pathology and Medical Research; Westmead Hospital; University of Sydney	CIDM-PH et al. et al
Australia/NSW1193/2020	EPI_ISL_667793	2020-10-30	South Eastern Area Laboratory Services (SEALS)	NSW Health Pathology - Institute of Clinical Pathology and Medical Research; Westmead Hospital; University of Sydney	CIDM-PH et al. et al
Australia/NSW1194/2020	EPI_ISL_667794	2020-10-30	South Eastern Area Laboratory Services (SEALS)	NSW Health Pathology - Institute of Clinical Pathology and Medical Research; Westmead Hospital; University of Sydney	CIDM-PH et al. et al
Australia/NSW1195/2020	EPI_ISL_667795	2020-10-30	South Eastern Area Laboratory Services (SEALS)	NSW Health Pathology - Institute of Clinical Pathology and Medical Research; Westmead Hospital; University of Sydney	CIDM-PH et al. et al
Australia/NSW1196/2020	EPI_ISL_667796	2020-10-11	South Eastern Area Laboratory Services (SEALS)	NSW Health Pathology - Institute of Clinical Pathology and Medical Research; Westmead Hospital; University of Sydney	CIDM-PH et al. et al
Australia/NSW1197/2020	EPI_ISL_667797	2020-10-17	South Eastern Area Laboratory Services (SEALS)	NSW Health Pathology - Institute of Clinical Pathology and Medical Research; Westmead Hospital; University of Sydney	CIDM-PH et al. et al
Australia/NSW1198/2020	EPI_ISL_667798	2020-11-06	South Eastern Area Laboratory Services (SEALS)	NSW Health Pathology - Institute of Clinical Pathology and Medical Research; Westmead Hospital; University of Sydney	CIDM-PH et al. et al
Australia/NSW1199/2020	EPI_ISL_667799	2020-11-05	South Eastern Area Laboratory Services (SEALS)	NSW Health Pathology - Institute of Clinical Pathology and Medical Research; Westmead Hospital; University of Sydney	CIDM-PH et al. et al
Australia/NSW12/2020	EPI_ISL_413598	2020-03-04	Centre for Infectious Diseases and Microbiology - Public Health	NSW Health Pathology - Institute of Clinical Pathology and Medical Research; Westmead Hospital; University of Sydney	Gray K et al
Australia/NSW120/2020	EPI_ISL_427679	2020-03-22	Centre for Infectious Diseases and Microbiology Public Health	NSW Health Pathology - Institute of Clinical Pathology and Medical Research; Westmead Hospital; University of Sydney	Draper J et al
Australia/NSW1200/2020	EPI_ISL_667800	2020-11-07	South Eastern Area Laboratory Services (SEALS)	NSW Health Pathology - Institute of Clinical Pathology and Medical Research; Westmead Hospital; University of Sydney	CIDM-PH et al. et al
Australia/NSW1201/2020	EPI_ISL_667801	2020-11-08	South Eastern Area Laboratory Services (SEALS)	NSW Health Pathology - Institute of Clinical Pathology and Medical Research; Westmead Hospital; University of Sydney	CIDM-PH et al. et al
Australia/NSW1202/2020	EPI_ISL_699653	2020-11-09	South Eastern Area Laboratory Services (SEALS)	NSW Health Pathology - Institute of Clinical Pathology and Medical Research; Westmead Hospital; University of Sydney	CIDM-PH et al. et al
Australia/NSW1203/2020	EPI_ISL_667802	2020-11-06	South Eastern Area Laboratory Services (SEALS)	NSW Health Pathology - Institute of Clinical Pathology and Medical Research; Westmead Hospital; University of Sydney	CIDM-PH et al. et al
Australia/NSW1204/2020	EPI_ISL_699654	2020-11-07	South Eastern Area Laboratory Services (SEALS)	NSW Health Pathology - Institute of Clinical Pathology and Medical Research; Westmead Hospital; University of Sydney	CIDM-PH et al. et al
Australia/NSW1205/2020	EPI_ISL_667803	2020-11-08	South Eastern Area Laboratory Services (SEALS)	NSW Health Pathology - Institute of Clinical Pathology and Medical Research; Westmead Hospital; University of Sydney	CIDM-PH et al. et al
Australia/NSW1206/2020	EPI_ISL_667804	2020-11-09	South Eastern Area Laboratory Services (SEALS)	NSW Health Pathology - Institute of Clinical Pathology and Medical Research; Westmead Hospital; University of Sydney	CIDM-PH et al. et al
Australia/NSW1207/2020	EPI_ISL_667805	2020-11-07	South Eastern Area Laboratory Services (SEALS)	NSW Health Pathology - Institute of Clinical Pathology and Medical Research; Westmead Hospital; University of Sydney	CIDM-PH et al. et al
Australia/NSW1208/2020	EPI_ISL_667806	2020-11-03	South Eastern Area Laboratory Services (SEALS)	NSW Health Pathology - Institute of Clinical Pathology and Medical Research; Westmead Hospital; University of Sydney	CIDM-PH et al. et al
Australia/NSW1209/2020	EPI_ISL_672574	2020-12-02	Histopath	NSW Health Pathology - Institute of Clinical Pathology and Medical Research; Westmead Hospital; University of Sydney	CIDM-PH et al. et al
Australia/NSW121/2020	EPI_ISL_427688	2020-03-22	Centre for Infectious Diseases and Microbiology Public Health	NSW Health Pathology - Institute of Clinical Pathology and Medical Research; Westmead Hospital; University of Sydney	Sim E et al
Australia/NSW1211/2020	EPI_ISL_672655	2020-11-16	South Eastern Area Laboratory Services (SEALS)	NSW Health Pathology - Institute of Clinical Pathology and Medical Research; Westmead Hospital; University of Sydney	CIDM-PH et al. et al
Australia/NSW1212/2020	EPI_ISL_672656	2020-11-19	South Eastern Area Laboratory Services (SEALS)	NSW Health Pathology - Institute of Clinical Pathology and Medical Research; Westmead Hospital; University of Sydney	CIDM-PH et al. et al
Australia/NSW1213/2020	EPI_ISL_672657	2020-11-19	South Eastern Area Laboratory Services (SEALS)	NSW Health Pathology - Institute of Clinical Pathology and Medical Research; Westmead Hospital; University of Sydney	CIDM-PH et al. et al
Australia/NSW1214/2020	EPI_ISL_672658	2020-11-19	South Eastern Area Laboratory Services (SEALS)	NSW Health Pathology - Institute of Clinical Pathology and Medical Research; Westmead Hospital; University of Sydney	CIDM-PH et al. et al
Australia/NSW1215/2020	EPI_ISL_672659	2020-11-17	South Eastern Area Laboratory Services (SEALS)	NSW Health Pathology - Institute of Clinical Pathology and Medical Research; Westmead Hospital; University of Sydney	CIDM-PH et al. et al
Australia/NSW1216/2020	EPI_ISL_672660	2020-11-14	South Eastern Area Laboratory Services (SEALS)	NSW Health Pathology - Institute of Clinical Pathology and Medical Research; Westmead Hospital; University of Sydney	CIDM-PH et al. et al
Australia/NSW1217/2020	EPI_ISL_672661	2020-11-13	South Eastern Area Laboratory Services (SEALS)	NSW Health Pathology - Institute of Clinical Pathology and Medical Research; Westmead Hospital; University of Sydney	CIDM-PH et al. et al
Australia/NSW1218/2020	EPI_ISL_672662	2020-11-13	South Eastern Area Laboratory Services (SEALS)	NSW Health Pathology - Institute of Clinical Pathology and Medical Research; Westmead Hospital; University of Sydney	CIDM-PH et al. et al
Australia/NSW1219/2020	EPI_ISL_708798	2020-12-15	Sydney South West Pathology Service (SSWPS) - Royal Prince Alfred Hospital - NSW Health Pathology	NSW Health Pathology - Institute of Clinical Pathology and Medical Research; Westmead Hospital; University of Sydney	CIDM-PH et al. et al
Australia/NSW122/2020	EPI_ISL_427778	2020-03-26	Centre for Infectious Diseases and Microbiology Public Health	NSW Health Pathology - Institute of Clinical Pathology and Medical Research; Westmead Hospital; University of Sydney	Bachmann N et al
Australia/NSW1220/2020	EPI_ISL_708799	2020-12-15	Pathology North - Royal North Shore Hospital - NSW Health Pathology	NSW Health Pathology - Institute of Clinical Pathology and Medical Research; Westmead Hospital; University of Sydney	CIDM-PH et al. et al
Australia/NSW1221/2020	EPI_ISL_710120	2020-11-08	South Eastern Area Laboratory Services (SEALS)	CIDM-PH et al.	CIDM-PH et al. et al
Australia/NSW1223/2020	EPI_ISL_710121	2020-11-03	South Eastern Area Laboratory Services (SEALS)	CIDM-PH et al.	CIDM-PH et al. et al
Australia/NSW1224/2020	EPI_ISL_710122	2020-11-14	South Eastern Area Laboratory Services (SEALS)	CIDM-PH et al.	CIDM-PH et al. et al
Australia/NSW1225/2020	EPI_ISL_710123	2020-11-19	South Eastern Area Laboratory Services (SEALS)	CIDM-PH et al.	CIDM-PH et al. et al
Australia/NSW1226/2020	EPI_ISL_710124	2020-11-29	South Eastern Area Laboratory Services (SEALS)	CIDM-PH et al.	CIDM-PH et al. et al
Australia/NSW1227/2020	EPI_ISL_710125	2020-12-02	South Eastern Area Laboratory Services (SEALS)	CIDM-PH et al.	CIDM-PH et al. et al
Australia/NSW1228/2020	EPI_ISL_710126	2020-12-04	South Eastern Area Laboratory Services (SEALS)	CIDM-PH et al.	CIDM-PH et al. et al
Australia/NSW1229/2020	EPI_ISL_710127	2020-12-01	South Eastern Area Laboratory Services (SEALS)	CIDM-PH et al.	CIDM-PH et al. et al
Australia/NSW123/2020	EPI_ISL_427780	2020-03-23	Centre for Infectious Diseases and Microbiology Public Health	NSW Health Pathology - Institute of Clinical Pathology and Medical Research; Westmead Hospital; University of Sydney	Rockett R et al
Australia/NSW1230/2020	EPI_ISL_710128	2020-12-01	South Eastern Area Laboratory Services (SEALS)	CIDM-PH et al.	CIDM-PH et al. et al
Australia/NSW1231/2020	EPI_ISL_710129	2020-12-16	Pathology North - Royal North Shore Hospital - NSW Health Pathology	CIDM-PH et al.	CIDM-PH et al. et al
Australia/NSW1232/2020	EPI_ISL_740863	2020-11-30	South Eastern Area Laboratory Services (SEALS)	NSW Health Pathology - Institute of Clinical Pathology and Medical Research; Westmead Hospital; University of Sydney	CIDM-PH et al. et al
Australia/NSW1233/2020	EPI_ISL_740864	2020-11-29	South Eastern Area Laboratory Services (SEALS)	NSW Health Pathology - Institute of Clinical Pathology and Medical Research; Westmead Hospital; University of Sydney	CIDM-PH et al. et al
Australia/NSW1234/2020	EPI_ISL_740865	2020-11-30	South Eastern Area Laboratory Services (SEALS)	NSW Health Pathology - Institute of Clinical Pathology and Medical Research; Westmead Hospital; University of Sydney	CIDM-PH et al. et al
Australia/NSW1235/2020	EPI_ISL_740866	2020-12-16	Pathology North - Royal North Shore Hospital - NSW Health Pathology	NSW Health Pathology - Institute of Clinical Pathology and Medical Research; Westmead Hospital; University of Sydney	CIDM-PH et al. et al
Australia/NSW1236/2020	EPI_ISL_740867	2020-12-14	South Eastern Area Laboratory Services (SEALS)	NSW Health Pathology - Institute of Clinical Pathology and Medical Research; Westmead Hospital; University of Sydney	CIDM-PH et al. et al
Australia/NSW1237/2020	EPI_ISL_740868	2020-12-14	South Eastern Area Laboratory Services (SEALS)	NSW Health Pathology - Institute of Clinical Pathology and Medical Research; Westmead Hospital; University of Sydney	CIDM-PH et al. et al
Australia/NSW1238/2020	EPI_ISL_740869	2020-12-10	South Eastern Area Laboratory Services (SEALS)	NSW Health Pathology - Institute of Clinical Pathology and Medical Research; Westmead Hospital; University of Sydney	CIDM-PH et al. et al
Australia/NSW1239/2020	EPI_ISL_740870	2020-12-11	South Eastern Area Laboratory Services (SEALS)	NSW Health Pathology - Institute of Clinical Pathology and Medical Research; Westmead Hospital; University of Sydney	CIDM-PH et al. et al
Australia/NSW124/2020	EPI_ISL_427782	2020-03-26	Centre for Infectious Diseases and Microbiology Public Health	NSW Health Pathology - Institute of Clinical Pathology and Medical Research; Westmead Hospital; University of Sydney	Lam C et al
Australia/NSW1240/2020	EPI_ISL_740871	2020-12-08	South Eastern Area Laboratory Services (SEALS)	NSW Health Pathology - Institute of Clinical Pathology and Medical Research; Westmead Hospital; University of Sydney	CIDM-PH et al. et al
Australia/NSW1241/2020	EPI_ISL_740872	2020-12-08	South Eastern Area Laboratory Services (SEALS)	NSW Health Pathology - Institute of Clinical Pathology and Medical Research; Westmead Hospital; University of Sydney	CIDM-PH et al. et al
Australia/NSW1242/2020	EPI_ISL_740873	2020-12-09	South Eastern Area Laboratory Services (SEALS)	NSW Health Pathology - Institute of Clinical Pathology and Medical Research; Westmead Hospital; University of Sydney	CIDM-PH et al. et al
Australia/NSW1243/2020	EPI_ISL_740874	2020-12-09	South Eastern Area Laboratory Services (SEALS)	NSW Health Pathology - Institute of Clinical Pathology and Medical Research; Westmead Hospital; University of Sydney	CIDM-PH et al. et al
Australia/NSW1244/2020	EPI_ISL_740875	2020-12-16	Pathology North - Royal North Shore Hospital - NSW Health Pathology	NSW Health Pathology - Institute of Clinical Pathology and Medical Research; Westmead Hospital; University of Sydney	CIDM-PH et al. et al
Australia/NSW1245/2020	EPI_ISL_740876	2020-12-16	Pathology North - Royal North Shore Hospital - NSW Health Pathology	NSW Health Pathology - Institute of Clinical Pathology and Medical Research; Westmead Hospital; University of Sydney	CIDM-PH et al. et al
Australia/NSW1246/2020	EPI_ISL_740877	2020-12-16	Pathology North - Royal North Shore Hospital - NSW Health Pathology	NSW Health Pathology - Institute of Clinical Pathology and Medical Research; Westmead Hospital; University of Sydney	CIDM-PH et al. et al
Australia/NSW1247/2020	EPI_ISL_740878	2020-12-16	Pathology North - Royal North Shore Hospital - NSW Health Pathology	NSW Health Pathology - Institute of Clinical Pathology and Medical Research; Westmead Hospital; University of Sydney	CIDM-PH et al. et al
Australia/NSW1248/2020	EPI_ISL_740879	2020-12-17	Histopath	NSW Health Pathology - Institute of Clinical Pathology and Medical Research; Westmead Hospital; University of Sydney	CIDM-PH et al. et al
Australia/NSW1249/2020	EPI_ISL_740880	2020-12-17	Histopath	NSW Health Pathology - Institute of Clinical Pathology and Medical Research; Westmead Hospital; University of Sydney	CIDM-PH et al. et al
Australia/NSW125/2020	EPI_ISL_427785	2020-03-23	Centre for Infectious Diseases and Microbiology Public Health	NSW Health Pathology - Institute of Clinical Pathology and Medical Research; Westmead Hospital; University of Sydney	Gray K et al
Australia/NSW1250/2020	EPI_ISL_740881	2020-12-19	Douglass Hanly Moir Pathology	NSW Health Pathology - Institute of Clinical Pathology and Medical Research; Westmead Hospital; University of Sydney	CIDM-PH et al. et al
Australia/NSW1251/2020	EPI_ISL_740882	2020-12-19	Douglass Hanly Moir Pathology	NSW Health Pathology - Institute of Clinical Pathology and Medical Research; Westmead Hospital; University of Sydney	CIDM-PH et al. et al
Australia/NSW1252/2020	EPI_ISL_740883	2020-12-18	Pathology North - Royal North Shore Hospital - NSW Health Pathology	NSW Health Pathology - Institute of Clinical Pathology and Medical Research; Westmead Hospital; University of Sydney	CIDM-PH et al. et al
Australia/NSW1253/2020	EPI_ISL_740884	2020-12-18	Pathology North - Royal North Shore Hospital - NSW Health Pathology	NSW Health Pathology - Institute of Clinical Pathology and Medical Research; Westmead Hospital; University of Sydney	CIDM-PH et al. et al
Australia/NSW1254/2020	EPI_ISL_740885	2020-12-17	Pathology North - Royal North Shore Hospital - NSW Health Pathology	NSW Health Pathology - Institute of Clinical Pathology and Medical Research; Westmead Hospital; University of Sydney	CIDM-PH et al. et al
Australia/NSW1255/2020	EPI_ISL_740886	2020-12-18	Pathology North - Royal North Shore Hospital - NSW Health Pathology	NSW Health Pathology - Institute of Clinical Pathology and Medical Research; Westmead Hospital; University of Sydney	CIDM-PH et al. et al
Australia/NSW1256/2020	EPI_ISL_740887	2020-12-18	Pathology North - Royal North Shore Hospital - NSW Health Pathology	NSW Health Pathology - Institute of Clinical Pathology and Medical Research; Westmead Hospital; University of Sydney	CIDM-PH et al. et al
Australia/NSW1257/2020	EPI_ISL_740888	2020-12-19	Pathology North - Royal North Shore Hospital - NSW Health Pathology	NSW Health Pathology - Institute of Clinical Pathology and Medical Research; Westmead Hospital; University of Sydney	CIDM-PH et al. et al
Australia/NSW1258/2020	EPI_ISL_740889	2020-12-18	Pathology North - Royal North Shore Hospital - NSW Health Pathology	NSW Health Pathology - Institute of Clinical Pathology and Medical Research; Westmead Hospital; University of Sydney	CIDM-PH et al. et al
Australia/NSW1259/2020	EPI_ISL_740890	2020-12-20	Pathology West - NSW Health Pathology	NSW Health Pathology - Institute of Clinical Pathology and Medical Research; Westmead Hospital; University of Sydney	CIDM-PH et al. et al
Australia/NSW126/2020	EPI_ISL_427794	2020-03-23	Centre for Infectious Diseases and Microbiology Public Health	NSW Health Pathology - Institute of Clinical Pathology and Medical Research; Westmead Hospital; University of Sydney	Timms V et al
Australia/NSW1260/2020	EPI_ISL_740891	2020-12-17	Pathology North - Hunter - NSW Health Pathology	NSW Health Pathology - Institute of Clinical Pathology and Medical Research; Westmead Hospital; University of Sydney	CIDM-PH et al. et al
Australia/NSW1261/2020	EPI_ISL_740892	2020-12-18	Laverty Pathology	NSW Health Pathology - Institute of Clinical Pathology and Medical Research; Westmead Hospital; University of Sydney	CIDM-PH et al. et al
Australia/NSW1262/2020	EPI_ISL_740893	2020-12-18	Laverty Pathology	NSW Health Pathology - Institute of Clinical Pathology and Medical Research; Westmead Hospital; University of Sydney	CIDM-PH et al. et al
Australia/NSW1263/2020	EPI_ISL_740894	2020-12-14	Sydney South West Pathology Service (SSWPS) - Royal Prince Alfred Hospital - NSW Health Pathology	NSW Health Pathology - Institute of Clinical Pathology and Medical Research; Westmead Hospital; University of Sydney	CIDM-PH et al. et al
Australia/NSW1264/2020	EPI_ISL_740895	2020-12-14	Sydney South West Pathology Service (SSWPS) - Royal Prince Alfred Hospital - NSW Health Pathology	NSW Health Pathology - Institute of Clinical Pathology and Medical Research; Westmead Hospital; University of Sydney	CIDM-PH et al. et al
Australia/NSW1265/2020	EPI_ISL_740896	2020-12-22	Histopath	NSW Health Pathology - Institute of Clinical Pathology and Medical Research; Westmead Hospital; University of Sydney	CIDM-PH et al. et al
Australia/NSW1266/2020	EPI_ISL_745097	2020-12-16	Pathology North - Royal North Shore Hospital - NSW Health Pathology	CIDM-PH, Westmead Hospital	CIDM-PH et al. et al
Australia/NSW1267/2020	EPI_ISL_745098	2020-12-16	Pathology North - Royal North Shore Hospital - NSW Health Pathology	CIDM-PH, Westmead Hospital	CIDM-PH et al. et al
Australia/NSW1268/2020	EPI_ISL_745099	2020-12-16	Pathology North - Royal North Shore Hospital - NSW Health Pathology	CIDM-PH, Westmead Hospital	CIDM-PH et al. et al
Australia/NSW1269/2020	EPI_ISL_745100	2020-12-17	Pathology North - Royal North Shore Hospital - NSW Health Pathology	CIDM-PH, Westmead Hospital	CIDM-PH et al. et al
Australia/NSW127/2020	EPI_ISL_427808	2020-03-26	Centre for Infectious Diseases and Microbiology Public Health	NSW Health Pathology - Institute of Clinical Pathology and Medical Research; Westmead Hospital; University of Sydney	Gall M et al
Australia/NSW1270/2020	EPI_ISL_745101	2020-12-17	Pathology North - Royal North Shore Hospital - NSW Health Pathology	CIDM-PH, Westmead Hospital	CIDM-PH et al. et al
Australia/NSW1271/2020	EPI_ISL_745102	2020-12-17	Pathology North - Royal North Shore Hospital - NSW Health Pathology	CIDM-PH, Westmead Hospital	CIDM-PH et al. et al
Australia/NSW1272/2020	EPI_ISL_745103	2020-12-17	Pathology North - Royal North Shore Hospital - NSW Health Pathology	CIDM-PH, Westmead Hospital	CIDM-PH et al. et al
Australia/NSW1273/2020	EPI_ISL_745104	2020-12-17	Pathology North - Royal North Shore Hospital - NSW Health Pathology	CIDM-PH, Westmead Hospital	CIDM-PH et al. et al
Australia/NSW1274/2020	EPI_ISL_745105	2020-12-16	Pathology North - Royal North Shore Hospital - NSW Health Pathology	CIDM-PH, Westmead Hospital	CIDM-PH et al. et al
Australia/NSW1275/2020	EPI_ISL_745091	2020-12-17	Australian Clinical Labs	CIDM-PH, Westmead Hospital	CIDM-PH et al. et al
Australia/NSW1276/2020	EPI_ISL_745092	2020-12-17	Australian Clinical Labs	CIDM-PH, Westmead Hospital	CIDM-PH et al. et al
Australia/NSW1277/2020	EPI_ISL_745108	2020-12-17	St Vincent's Pathology (SydPath)	CIDM-PH, Westmead Hospital	CIDM-PH et al. et al
Australia/NSW1278/2020	EPI_ISL_745093	2020-12-17	Histopath	CIDM-PH, Westmead Hospital	CIDM-PH et al. et al
Australia/NSW1279/2020	EPI_ISL_745094	2020-12-17	Histopath	CIDM-PH, Westmead Hospital	CIDM-PH et al. et al
Australia/NSW128/2020	EPI_ISL_427689	2020-03-22	Centre for Infectious Diseases and Microbiology Public Health	NSW Health Pathology - Institute of Clinical Pathology and Medical Research; Westmead Hospital; University of Sydney	Arnott A et al
Australia/NSW1280/2020	EPI_ISL_745095	2020-12-17	Laverty Pathology	CIDM-PH, Westmead Hospital	CIDM-PH et al. et al
Australia/NSW1281/2020	EPI_ISL_745096	2020-12-17	Pathology North - Hunter - NSW Health Pathology	CIDM-PH, Westmead Hospital	CIDM-PH et al. et al
Australia/NSW1282/2020	EPI_ISL_745106	2020-12-17	Pathology North - Royal North Shore Hospital - NSW Health Pathology	CIDM-PH, Westmead Hospital	CIDM-PH et al. et al
Australia/NSW1283/2020	EPI_ISL_745107	2020-12-17	Pathology North - Royal North Shore Hospital - NSW Health Pathology	CIDM-PH, Westmead Hospital	CIDM-PH et al. et al
Australia/NSW1284/2020	EPI_ISL_767850	2020-11-12	South Eastern Area Laboratory Services (SEALS)	NSW Health Pathology - Institute of Clinical Pathology and Medical Research; Westmead Hospital; University of Sydney	CIDM-PH et al. et al
Australia/NSW1285/2020	EPI_ISL_767851	2020-11-20	South Eastern Area Laboratory Services (SEALS)	NSW Health Pathology - Institute of Clinical Pathology and Medical Research; Westmead Hospital; University of Sydney	CIDM-PH et al. et al
Australia/NSW1286/2020	EPI_ISL_767852	2020-11-20	South Eastern Area Laboratory Services (SEALS)	NSW Health Pathology - Institute of Clinical Pathology and Medical Research; Westmead Hospital; University of Sydney	CIDM-PH et al. et al
Australia/NSW1287/2020	EPI_ISL_767853	2020-12-03	Sydney South West Pathology Service (SSWPS) - Royal Prince Alfred Hospital - NSW Health Pathology	NSW Health Pathology - Institute of Clinical Pathology and Medical Research; Westmead Hospital; University of Sydney	CIDM-PH et al. et al
Australia/NSW1288/2020	EPI_ISL_767854	2020-12-01	Sydney South West Pathology Service (SSWPS) - Royal Prince Alfred Hospital - NSW Health Pathology	NSW Health Pathology - Institute of Clinical Pathology and Medical Research; Westmead Hospital; University of Sydney	CIDM-PH et al. et al
Australia/NSW1289/2020	EPI_ISL_767855	2020-12-01	Sydney South West Pathology Service (SSWPS) - Royal Prince Alfred Hospital - NSW Health Pathology	NSW Health Pathology - Institute of Clinical Pathology and Medical Research; Westmead Hospital; University of Sydney	CIDM-PH et al. et al
Australia/NSW129/2020	EPI_ISL_427760	2020-03-23	Centre for Infectious Diseases and Microbiology Public Health	NSW Health Pathology - Institute of Clinical Pathology and Medical Research; Westmead Hospital; University of Sydney	Sadsad R et al
Australia/NSW1290/2020	EPI_ISL_767856	2020-12-01	Sydney South West Pathology Service (SSWPS) - Royal Prince Alfred Hospital - NSW Health Pathology	NSW Health Pathology - Institute of Clinical Pathology and Medical Research; Westmead Hospital; University of Sydney	CIDM-PH et al. et al
Australia/NSW1291/2020	EPI_ISL_767857	2020-11-29	Sydney South West Pathology Service (SSWPS) - Royal Prince Alfred Hospital - NSW Health Pathology	NSW Health Pathology - Institute of Clinical Pathology and Medical Research; Westmead Hospital; University of Sydney	CIDM-PH et al. et al
Australia/NSW1292/2020	EPI_ISL_767858	2020-11-22	Sydney South West Pathology Service (SSWPS) - Royal Prince Alfred Hospital - NSW Health Pathology	NSW Health Pathology - Institute of Clinical Pathology and Medical Research; Westmead Hospital; University of Sydney	CIDM-PH et al. et al
Australia/NSW1293/2020	EPI_ISL_767859	2020-11-20	Sydney South West Pathology Service (SSWPS) - Royal Prince Alfred Hospital - NSW Health Pathology	NSW Health Pathology - Institute of Clinical Pathology and Medical Research; Westmead Hospital; University of Sydney	CIDM-PH et al. et al
Australia/NSW1294/2020	EPI_ISL_767860	2020-11-20	Sydney South West Pathology Service (SSWPS) - Royal Prince Alfred Hospital - NSW Health Pathology	NSW Health Pathology - Institute of Clinical Pathology and Medical Research; Westmead Hospital; University of Sydney	CIDM-PH et al. et al
Australia/NSW1295/2020	EPI_ISL_767861	2020-11-17	Sydney South West Pathology Service (SSWPS) - Royal Prince Alfred Hospital - NSW Health Pathology	NSW Health Pathology - Institute of Clinical Pathology and Medical Research; Westmead Hospital; University of Sydney	CIDM-PH et al. et al
Australia/NSW1296/2020	EPI_ISL_767862	2020-11-17	Sydney South West Pathology Service (SSWPS) - Royal Prince Alfred Hospital - NSW Health Pathology	NSW Health Pathology - Institute of Clinical Pathology and Medical Research; Westmead Hospital; University of Sydney	CIDM-PH et al. et al
Australia/NSW1297/2020	EPI_ISL_767863	2020-11-12	Sydney South West Pathology Service (SSWPS) - Royal Prince Alfred Hospital - NSW Health Pathology	NSW Health Pathology - Institute of Clinical Pathology and Medical Research; Westmead Hospital; University of Sydney	CIDM-PH et al. et al
Australia/NSW1298/2020	EPI_ISL_767864	2020-11-08	Sydney South West Pathology Service (SSWPS) - Royal Prince Alfred Hospital - NSW Health Pathology	NSW Health Pathology - Institute of Clinical Pathology and Medical Research; Westmead Hospital; University of Sydney	CIDM-PH et al. et al
Australia/NSW1299/2020	EPI_ISL_767865	2020-11-08	Sydney South West Pathology Service (SSWPS) - Royal Prince Alfred Hospital - NSW Health Pathology	NSW Health Pathology - Institute of Clinical Pathology and Medical Research; Westmead Hospital; University of Sydney	CIDM-PH et al. et al
Australia/NSW13/2020	EPI_ISL_413599	2020-03-04	Centre for Infectious Diseases and Microbiology - Public Health	NSW Health Pathology - Institute of Clinical Pathology and Medical Research; Westmead Hospital; University of Sydney	Timms et al
Australia/NSW130/2020	EPI_ISL_427768	2020-03-24	Centre for Infectious Diseases and Microbiology Public Health	NSW Health Pathology - Institute of Clinical Pathology and Medical Research; Westmead Hospital; University of Sydney	Draper J et al
Australia/NSW1300/2020	EPI_ISL_767866	2020-11-08	Sydney South West Pathology Service (SSWPS) - Royal Prince Alfred Hospital - NSW Health Pathology	NSW Health Pathology - Institute of Clinical Pathology and Medical Research; Westmead Hospital; University of Sydney	CIDM-PH et al. et al
Australia/NSW1301/2020	EPI_ISL_767867	2020-11-06	Sydney South West Pathology Service (SSWPS) - Royal Prince Alfred Hospital - NSW Health Pathology	NSW Health Pathology - Institute of Clinical Pathology and Medical Research; Westmead Hospital; University of Sydney	CIDM-PH et al. et al
Australia/NSW1302/2020	EPI_ISL_767868	2020-12-18	Pathology North - Royal North Shore Hospital - NSW Health Pathology	NSW Health Pathology - Institute of Clinical Pathology and Medical Research; Westmead Hospital; University of Sydney	CIDM-PH et al. et al
Australia/NSW1303/2020	EPI_ISL_767869	2020-12-18	Laverty Pathology	NSW Health Pathology - Institute of Clinical Pathology and Medical Research; Westmead Hospital; University of Sydney	CIDM-PH et al. et al
Australia/NSW1304/2020	EPI_ISL_767870	2020-12-19	Pathology North - Royal North Shore Hospital - NSW Health Pathology	NSW Health Pathology - Institute of Clinical Pathology and Medical Research; Westmead Hospital; University of Sydney	CIDM-PH et al. et al
Australia/NSW1305/2020	EPI_ISL_767871	2020-12-18	Pathology North - Royal North Shore Hospital - NSW Health Pathology	NSW Health Pathology - Institute of Clinical Pathology and Medical Research; Westmead Hospital; University of Sydney	CIDM-PH et al. et al
Australia/NSW1306/2020	EPI_ISL_767872	2020-12-18	Histopath	NSW Health Pathology - Institute of Clinical Pathology and Medical Research; Westmead Hospital; University of Sydney	CIDM-PH et al. et al
Australia/NSW1307/2020	EPI_ISL_767873	2020-12-18	Histopath	NSW Health Pathology - Institute of Clinical Pathology and Medical Research; Westmead Hospital; University of Sydney	CIDM-PH et al. et al
Australia/NSW1308/2020	EPI_ISL_767874	2020-12-18	Histopath	NSW Health Pathology - Institute of Clinical Pathology and Medical Research; Westmead Hospital; University of Sydney	CIDM-PH et al. et al
Australia/NSW1309/2020	EPI_ISL_767875	2020-12-18	Histopath	NSW Health Pathology - Institute of Clinical Pathology and Medical Research; Westmead Hospital; University of Sydney	CIDM-PH et al. et al
Australia/NSW131/2020	EPI_ISL_427783	2020-03-23	Centre for Infectious Diseases and Microbiology Public Health	NSW Health Pathology - Institute of Clinical Pathology and Medical Research; Westmead Hospital; University of Sydney	Sim E et al
Australia/NSW1310/2020	EPI_ISL_767876	2020-12-21	Sydney South West Pathology Service (SSWPS) - Liverpool Hospital - NSW Health Pathology	NSW Health Pathology - Institute of Clinical Pathology and Medical Research; Westmead Hospital; University of Sydney	CIDM-PH et al. et al
Australia/NSW1311/2020	EPI_ISL_767877	2020-12-20	PALMS	NSW Health Pathology - Institute of Clinical Pathology and Medical Research; Westmead Hospital; University of Sydney	CIDM-PH et al. et al
Australia/NSW1312/2020	EPI_ISL_767878	2020-12-18	Laverty Pathology	NSW Health Pathology - Institute of Clinical Pathology and Medical Research; Westmead Hospital; University of Sydney	CIDM-PH et al. et al
Australia/NSW1313/2020	EPI_ISL_767879	2020-12-21	Laverty Pathology	NSW Health Pathology - Institute of Clinical Pathology and Medical Research; Westmead Hospital; University of Sydney	CIDM-PH et al. et al
Australia/NSW1314/2020	EPI_ISL_767880	2020-12-21	Laverty Pathology	NSW Health Pathology - Institute of Clinical Pathology and Medical Research; Westmead Hospital; University of Sydney	CIDM-PH et al. et al
Australia/NSW1315/2020	EPI_ISL_767881	2020-12-20	St Vincent's Pathology (SydPath)	NSW Health Pathology - Institute of Clinical Pathology and Medical Research; Westmead Hospital; University of Sydney	CIDM-PH et al. et al
Australia/NSW1316/2020	EPI_ISL_767882	2020-12-21	Medlab Pathology	NSW Health Pathology - Institute of Clinical Pathology and Medical Research; Westmead Hospital; University of Sydney	CIDM-PH et al. et al
Australia/NSW1317/2020	EPI_ISL_767883	2020-12-21	Medlab Pathology	NSW Health Pathology - Institute of Clinical Pathology and Medical Research; Westmead Hospital; University of Sydney	CIDM-PH et al. et al
Australia/NSW1318/2020	EPI_ISL_767884	2020-12-17	Australian Clinical Labs (formerly Healthscope Pathology)	NSW Health Pathology - Institute of Clinical Pathology and Medical Research; Westmead Hospital; University of Sydney	CIDM-PH et al. et al
Australia/NSW1319/2020	EPI_ISL_767885	2020-12-20	South Eastern Area Laboratory Services (SEALS)	NSW Health Pathology - Institute of Clinical Pathology and Medical Research; Westmead Hospital; University of Sydney	CIDM-PH et al. et al
Australia/NSW132/2020	EPI_ISL_427787	2020-03-23	Centre for Infectious Diseases and Microbiology Public Health	NSW Health Pathology - Institute of Clinical Pathology and Medical Research; Westmead Hospital; University of Sydney	Bachmann N et al
Australia/NSW1320/2020	EPI_ISL_767886	2020-12-15	South Eastern Area Laboratory Services (SEALS)	NSW Health Pathology - Institute of Clinical Pathology and Medical Research; Westmead Hospital; University of Sydney	CIDM-PH et al. et al
Australia/NSW1321/2020	EPI_ISL_767887	2020-12-16	South Eastern Area Laboratory Services (SEALS)	NSW Health Pathology - Institute of Clinical Pathology and Medical Research; Westmead Hospital; University of Sydney	CIDM-PH et al. et al
Australia/NSW1322/2020	EPI_ISL_767888	2020-12-16	South Eastern Area Laboratory Services (SEALS)	NSW Health Pathology - Institute of Clinical Pathology and Medical Research; Westmead Hospital; University of Sydney	CIDM-PH et al. et al
Australia/NSW1323/2020	EPI_ISL_767889	2020-12-19	South Eastern Area Laboratory Services (SEALS)	NSW Health Pathology - Institute of Clinical Pathology and Medical Research; Westmead Hospital; University of Sydney	CIDM-PH et al. et al
Australia/NSW1324/2020	EPI_ISL_767890	2020-12-19	South Eastern Area Laboratory Services (SEALS)	NSW Health Pathology - Institute of Clinical Pathology and Medical Research; Westmead Hospital; University of Sydney	CIDM-PH et al. et al
Australia/NSW1325/2020	EPI_ISL_767891	2020-12-17	South Eastern Area Laboratory Services (SEALS)	NSW Health Pathology - Institute of Clinical Pathology and Medical Research; Westmead Hospital; University of Sydney	CIDM-PH et al. et al
Australia/NSW1326/2020	EPI_ISL_767892	2020-12-18	South Eastern Area Laboratory Services (SEALS)	NSW Health Pathology - Institute of Clinical Pathology and Medical Research; Westmead Hospital; University of Sydney	CIDM-PH et al. et al
Australia/NSW1327/2020	EPI_ISL_767893	2020-12-23	Laverty Pathology	NSW Health Pathology - Institute of Clinical Pathology and Medical Research; Westmead Hospital; University of Sydney	CIDM-PH et al. et al
Australia/NSW1328/2020	EPI_ISL_767894	2020-12-22	St Vincent's Pathology (SydPath)	NSW Health Pathology - Institute of Clinical Pathology and Medical Research; Westmead Hospital; University of Sydney	CIDM-PH et al. et al
Australia/NSW1329/2020	EPI_ISL_767895	2020-12-24	St Vincent's Pathology (SydPath)	NSW Health Pathology - Institute of Clinical Pathology and Medical Research; Westmead Hospital; University of Sydney	CIDM-PH et al. et al
Australia/NSW133/2020	EPI_ISL_427791	2020-03-26	Centre for Infectious Diseases and Microbiology Public Health	NSW Health Pathology - Institute of Clinical Pathology and Medical Research; Westmead Hospital; University of Sydney	Rockett R et al
Australia/NSW1330/2020	EPI_ISL_767896	2020-12-24	Australian Clinical Labs	NSW Health Pathology - Institute of Clinical Pathology and Medical Research; Westmead Hospital; University of Sydney	CIDM-PH et al. et al
Australia/NSW1331/2020	EPI_ISL_767897	2020-12-24	PALMS	NSW Health Pathology - Institute of Clinical Pathology and Medical Research; Westmead Hospital; University of Sydney	CIDM-PH et al. et al
Australia/NSW1332/2020	EPI_ISL_767898	2020-12-24	Pathology West - NSW Health Pathology	NSW Health Pathology - Institute of Clinical Pathology and Medical Research; Westmead Hospital; University of Sydney	CIDM-PH et al. et al
Australia/NSW1333/2020	EPI_ISL_767899	2020-12-25	Laverty Pathology	NSW Health Pathology - Institute of Clinical Pathology and Medical Research; Westmead Hospital; University of Sydney	CIDM-PH et al. et al
Australia/NSW1334/2020	EPI_ISL_767900	2020-12-25	Sydney South West Pathology Service (SSWPS) - Liverpool Hospital - NSW Health Pathology	NSW Health Pathology - Institute of Clinical Pathology and Medical Research; Westmead Hospital; University of Sydney	CIDM-PH et al. et al
Australia/NSW1335/2020	EPI_ISL_767901	2020-12-25	Sydney South West Pathology Service (SSWPS) - Liverpool Hospital - NSW Health Pathology	NSW Health Pathology - Institute of Clinical Pathology and Medical Research; Westmead Hospital; University of Sydney	CIDM-PH et al. et al
Australia/NSW1336/2020	EPI_ISL_767902	2020-12-27	Australian Clinical Labs	NSW Health Pathology - Institute of Clinical Pathology and Medical Research; Westmead Hospital; University of Sydney	CIDM-PH et al. et al
Australia/NSW1337/2020	EPI_ISL_767903	2020-12-27	Laverty Pathology	NSW Health Pathology - Institute of Clinical Pathology and Medical Research; Westmead Hospital; University of Sydney	CIDM-PH et al. et al
Australia/NSW1338/2020	EPI_ISL_767904	2020-12-26	Sydney South West Pathology Service (SSWPS) - Liverpool Hospital - NSW Health Pathology	NSW Health Pathology - Institute of Clinical Pathology and Medical Research; Westmead Hospital; University of Sydney	CIDM-PH et al. et al
Australia/NSW1339/2020	EPI_ISL_767905	2020-12-28	Sydney South West Pathology Service (SSWPS) - Liverpool Hospital - NSW Health Pathology	NSW Health Pathology - Institute of Clinical Pathology and Medical Research; Westmead Hospital; University of Sydney	CIDM-PH et al. et al
Australia/NSW134/2020	EPI_ISL_427742	2020-03-21	Centre for Infectious Diseases and Microbiology Public Health	NSW Health Pathology - Institute of Clinical Pathology and Medical Research; Westmead Hospital; University of Sydney	Lam C et al
Australia/NSW1340/2020	EPI_ISL_767906	2020-12-29	Sydney South West Pathology Service (SSWPS) - Royal Prince Alfred Hospital - NSW Health Pathology	NSW Health Pathology - Institute of Clinical Pathology and Medical Research; Westmead Hospital; University of Sydney	CIDM-PH et al. et al
Australia/NSW1341/2020	EPI_ISL_767907	2020-12-28	Sydney South West Pathology Service (SSWPS) - Royal Prince Alfred Hospital - NSW Health Pathology	NSW Health Pathology - Institute of Clinical Pathology and Medical Research; Westmead Hospital; University of Sydney	CIDM-PH et al. et al
Australia/NSW1342/2020	EPI_ISL_767908	2020-12-29	Sydney South West Pathology Service (SSWPS) - Royal Prince Alfred Hospital - NSW Health Pathology	NSW Health Pathology - Institute of Clinical Pathology and Medical Research; Westmead Hospital; University of Sydney	CIDM-PH et al. et al
Australia/NSW1343/2020	EPI_ISL_767909	2020-12-29	Sydney South West Pathology Service (SSWPS) - Royal Prince Alfred Hospital - NSW Health Pathology	NSW Health Pathology - Institute of Clinical Pathology and Medical Research; Westmead Hospital; University of Sydney	CIDM-PH et al. et al
Australia/NSW1344/2020	EPI_ISL_767910	2020-12-29	Sydney South West Pathology Service (SSWPS) - Royal Prince Alfred Hospital - NSW Health Pathology	NSW Health Pathology - Institute of Clinical Pathology and Medical Research; Westmead Hospital; University of Sydney	CIDM-PH et al. et al
Australia/NSW1345/2020	EPI_ISL_767911	2020-12-29	Sydney South West Pathology Service (SSWPS) - Liverpool Hospital - NSW Health Pathology	NSW Health Pathology - Institute of Clinical Pathology and Medical Research; Westmead Hospital; University of Sydney	CIDM-PH et al. et al
Australia/NSW1346/2020	EPI_ISL_767912	2020-12-29	Sydney South West Pathology Service (SSWPS) - Liverpool Hospital - NSW Health Pathology	NSW Health Pathology - Institute of Clinical Pathology and Medical Research; Westmead Hospital; University of Sydney	CIDM-PH et al. et al
Australia/NSW1347/2020	EPI_ISL_767913	2020-12-29	Sydney South West Pathology Service (SSWPS) - Liverpool Hospital - NSW Health Pathology	NSW Health Pathology - Institute of Clinical Pathology and Medical Research; Westmead Hospital; University of Sydney	CIDM-PH et al. et al
Australia/NSW1348/2020	EPI_ISL_767914	2020-12-29	Sydney South West Pathology Service (SSWPS) - Royal Prince Alfred Hospital - NSW Health Pathology	NSW Health Pathology - Institute of Clinical Pathology and Medical Research; Westmead Hospital; University of Sydney	CIDM-PH et al. et al
Australia/NSW1349/2020	EPI_ISL_767915	2020-12-23	St Vincent's Pathology (SydPath)	NSW Health Pathology - Institute of Clinical Pathology and Medical Research; Westmead Hospital; University of Sydney	CIDM-PH et al. et al
Australia/NSW135/2020	EPI_ISL_427673	2020-03-22	Centre for Infectious Diseases and Microbiology Public Health	NSW Health Pathology - Institute of Clinical Pathology and Medical Research; Westmead Hospital; University of Sydney	Gray K et al
Australia/NSW1350/2020	EPI_ISL_767916	2020-12-28	Australian Clinical Labs	NSW Health Pathology - Institute of Clinical Pathology and Medical Research; Westmead Hospital; University of Sydney	CIDM-PH et al. et al
Australia/NSW1351/2020	EPI_ISL_767917	2020-12-28	Australian Clinical Labs	NSW Health Pathology - Institute of Clinical Pathology and Medical Research; Westmead Hospital; University of Sydney	CIDM-PH et al. et al
Australia/NSW1352/2020	EPI_ISL_767918	2020-12-28	Australian Clinical Labs	NSW Health Pathology - Institute of Clinical Pathology and Medical Research; Westmead Hospital; University of Sydney	CIDM-PH et al. et al
Australia/NSW1353/2020	EPI_ISL_767919	2020-12-28	Laverty Pathology	NSW Health Pathology - Institute of Clinical Pathology and Medical Research; Westmead Hospital; University of Sydney	CIDM-PH et al. et al
Australia/NSW1354/2020	EPI_ISL_767920	2020-12-28	Pathology North - Hunter - NSW Health Pathology	NSW Health Pathology - Institute of Clinical Pathology and Medical Research; Westmead Hospital; University of Sydney	CIDM-PH et al. et al
Australia/NSW1355/2020	EPI_ISL_767921	2020-12-29	South Eastern Area Laboratory Services (SEALS)	NSW Health Pathology - Institute of Clinical Pathology and Medical Research; Westmead Hospital; University of Sydney	CIDM-PH et al. et al
Australia/NSW1356/2020	EPI_ISL_767922	2020-12-25	South Eastern Area Laboratory Services (SEALS)	NSW Health Pathology - Institute of Clinical Pathology and Medical Research; Westmead Hospital; University of Sydney	CIDM-PH et al. et al
Australia/NSW1357/2020	EPI_ISL_767923	2020-12-28	South Eastern Area Laboratory Services (SEALS)	NSW Health Pathology - Institute of Clinical Pathology and Medical Research; Westmead Hospital; University of Sydney	CIDM-PH et al. et al
Australia/NSW1358/2020	EPI_ISL_767924	2020-12-28	South Eastern Area Laboratory Services (SEALS)	NSW Health Pathology - Institute of Clinical Pathology and Medical Research; Westmead Hospital; University of Sydney	CIDM-PH et al. et al
Australia/NSW1359/2020	EPI_ISL_767925	2020-12-28	Histopath	NSW Health Pathology - Institute of Clinical Pathology and Medical Research; Westmead Hospital; University of Sydney	CIDM-PH et al. et al
Australia/NSW136/2020	EPI_ISL_427692	2020-03-23	Centre for Infectious Diseases and Microbiology Public Health	NSW Health Pathology - Institute of Clinical Pathology and Medical Research; Westmead Hospital; University of Sydney	Timms V et al
Australia/NSW1360/2020	EPI_ISL_767926	2020-12-28	Histopath	NSW Health Pathology - Institute of Clinical Pathology and Medical Research; Westmead Hospital; University of Sydney	CIDM-PH et al. et al
Australia/NSW1361/2020	EPI_ISL_767927	2020-12-30	St Vincent's Pathology (SydPath)	NSW Health Pathology - Institute of Clinical Pathology and Medical Research; Westmead Hospital; University of Sydney	CIDM-PH et al. et al
Australia/NSW1362/2020	EPI_ISL_767928	2020-12-30	South Eastern Area Laboratory Services (SEALS)	NSW Health Pathology - Institute of Clinical Pathology and Medical Research; Westmead Hospital; University of Sydney	CIDM-PH et al. et al
Australia/NSW1363/2020	EPI_ISL_767929	2020-12-28	Southern. IML Pathology	NSW Health Pathology - Institute of Clinical Pathology and Medical Research; Westmead Hospital; University of Sydney	CIDM-PH et al. et al
Australia/NSW1364/2020	EPI_ISL_767930	2020-12-28	Sydney South West Pathology Service (SSWPS) - Royal Prince Alfred Hospital - NSW Health Pathology	NSW Health Pathology - Institute of Clinical Pathology and Medical Research; Westmead Hospital; University of Sydney	CIDM-PH et al. et al
Australia/NSW1365/2020	EPI_ISL_767931	2020-12-25	4Cyte Pathology	NSW Health Pathology - Institute of Clinical Pathology and Medical Research; Westmead Hospital; University of Sydney	CIDM-PH et al. et al
Australia/NSW1366/2020	EPI_ISL_767932	2020-12-24	Southern. IML Pathology	NSW Health Pathology - Institute of Clinical Pathology and Medical Research; Westmead Hospital; University of Sydney	CIDM-PH et al. et al
Australia/NSW1367/2020	EPI_ISL_767933	2020-12-31	Pathology West - NSW Health Pathology	NSW Health Pathology - Institute of Clinical Pathology and Medical Research; Westmead Hospital; University of Sydney	CIDM-PH et al. et al
Australia/NSW1368/2020	EPI_ISL_767934	2020-12-31	Pathology West - NSW Health Pathology	NSW Health Pathology - Institute of Clinical Pathology and Medical Research; Westmead Hospital; University of Sydney	CIDM-PH et al. et al
Australia/NSW1369/2020	EPI_ISL_767935	2020-12-31	Pathology West - NSW Health Pathology	NSW Health Pathology - Institute of Clinical Pathology and Medical Research; Westmead Hospital; University of Sydney	CIDM-PH et al. et al
Australia/NSW137/2020	EPI_ISL_427700	2020-03-23	Centre for Infectious Diseases and Microbiology Public Health	NSW Health Pathology - Institute of Clinical Pathology and Medical Research; Westmead Hospital; University of Sydney	Gall M et al
Australia/NSW1370/2020	EPI_ISL_767936	2020-12-31	Pathology West - NSW Health Pathology	NSW Health Pathology - Institute of Clinical Pathology and Medical Research; Westmead Hospital; University of Sydney	CIDM-PH et al. et al
Australia/NSW1371/2021	EPI_ISL_767937	2021-01-03	Pathology West - NSW Health Pathology	NSW Health Pathology - Institute of Clinical Pathology and Medical Research; Westmead Hospital; University of Sydney	CIDM-PH et al. et al
Australia/NSW1372/2021	EPI_ISL_767938	2021-01-02	Laverty Pathology	NSW Health Pathology - Institute of Clinical Pathology and Medical Research; Westmead Hospital; University of Sydney	CIDM-PH et al. et al
Australia/NSW1373/2021	EPI_ISL_767939	2021-01-01	Sydney South West Pathology Service (SSWPS) - Liverpool Hospital - NSW Health Pathology	NSW Health Pathology - Institute of Clinical Pathology and Medical Research; Westmead Hospital; University of Sydney	CIDM-PH et al. et al
Australia/NSW1374/2021	EPI_ISL_767940	2021-01-01	Sydney South West Pathology Service (SSWPS) - Liverpool Hospital - NSW Health Pathology	NSW Health Pathology - Institute of Clinical Pathology and Medical Research; Westmead Hospital; University of Sydney	CIDM-PH et al. et al
Australia/NSW1375/2020	EPI_ISL_768600	2020-12-19	South Eastern Area Laboratory Services (SEALS)	NSW Health Pathology - Institute of Clinical Pathology and Medical Research; Westmead Hospital; University of Sydney	CIDM-PH et al. et al
Australia/NSW1377/2020	EPI_ISL_768601	2020-12-21	South Eastern Area Laboratory Services (SEALS)	NSW Health Pathology - Institute of Clinical Pathology and Medical Research; Westmead Hospital; University of Sydney	CIDM-PH et al. et al
Australia/NSW1378/2020	EPI_ISL_770820	2020-12-31	South East Regional Hospital	NSW Health Pathology - Institute of Clinical Pathology and Medical Research; Westmead Hospital; University of Sydney	CIDM-PH et al. et al
Australia/NSW1379/2020	EPI_ISL_770821	2020-12-31	South East Regional Hospital	NSW Health Pathology - Institute of Clinical Pathology and Medical Research; Westmead Hospital; University of Sydney	CIDM-PH et al. et al
Australia/NSW138/2020	EPI_ISL_427761	2020-03-23	Centre for Infectious Diseases and Microbiology Public Health	NSW Health Pathology - Institute of Clinical Pathology and Medical Research; Westmead Hospital; University of Sydney	Arnott A et al
Australia/NSW1380/2020	EPI_ISL_768602	2020-12-28	South Eastern Area Laboratory Services (SEALS)	NSW Health Pathology - Institute of Clinical Pathology and Medical Research; Westmead Hospital; University of Sydney	CIDM-PH et al. et al
Australia/NSW1381/2020	EPI_ISL_768603	2020-12-23	South Eastern Area Laboratory Services (SEALS)	NSW Health Pathology - Institute of Clinical Pathology and Medical Research; Westmead Hospital; University of Sydney	CIDM-PH et al. et al
Australia/NSW1382/2020	EPI_ISL_768604	2020-12-23	South Eastern Area Laboratory Services (SEALS)	NSW Health Pathology - Institute of Clinical Pathology and Medical Research; Westmead Hospital; University of Sydney	CIDM-PH et al. et al
Australia/NSW1383/2020	EPI_ISL_768605	2020-12-25	South Eastern Area Laboratory Services (SEALS)	NSW Health Pathology - Institute of Clinical Pathology and Medical Research; Westmead Hospital; University of Sydney	CIDM-PH et al. et al
Australia/NSW1384/2020	EPI_ISL_768606	2020-12-25	South Eastern Area Laboratory Services (SEALS)	NSW Health Pathology - Institute of Clinical Pathology and Medical Research; Westmead Hospital; University of Sydney	CIDM-PH et al. et al
Australia/NSW1385/2020	EPI_ISL_768607	2020-12-25	South Eastern Area Laboratory Services (SEALS)	NSW Health Pathology - Institute of Clinical Pathology and Medical Research; Westmead Hospital; University of Sydney	CIDM-PH et al. et al
Australia/NSW1386/2020	EPI_ISL_779396	2020-12-17	Pathology North - Royal North Shore Hospital - NSW Health Pathology	NSW Health Pathology - Institute of Clinical Pathology and Medical Research; Westmead Hospital; University of Sydney	CIDM-PH et al. et al
Australia/NSW1387/2020	EPI_ISL_779397	2020-12-21	South Eastern Area Laboratory Services (SEALS)	NSW Health Pathology - Institute of Clinical Pathology and Medical Research; Westmead Hospital; University of Sydney	CIDM-PH et al. et al
Australia/NSW1388/2021	EPI_ISL_779398	2021-01-04	Douglass Hanly Moir Pathology	NSW Health Pathology - Institute of Clinical Pathology and Medical Research; Westmead Hospital; University of Sydney	CIDM-PH et al. et al
Australia/NSW1389/2020	EPI_ISL_779399	2020-12-30	South Eastern Area Laboratory Services (SEALS)	NSW Health Pathology - Institute of Clinical Pathology and Medical Research; Westmead Hospital; University of Sydney	CIDM-PH et al. et al
Australia/NSW139/2020	EPI_ISL_427795	2020-03-25	Centre for Infectious Diseases and Microbiology Public Health	NSW Health Pathology - Institute of Clinical Pathology and Medical Research; Westmead Hospital; University of Sydney	Sadsad R et al
Australia/NSW1390/2020	EPI_ISL_779400	2020-12-29	South Eastern Area Laboratory Services (SEALS)	NSW Health Pathology - Institute of Clinical Pathology and Medical Research; Westmead Hospital; University of Sydney	CIDM-PH et al. et al
Australia/NSW1391/2021	EPI_ISL_779401	2021-01-01	South Eastern Area Laboratory Services (SEALS)	NSW Health Pathology - Institute of Clinical Pathology and Medical Research; Westmead Hospital; University of Sydney	CIDM-PH et al. et al
Australia/NSW1392/2021	EPI_ISL_791279	2021-01-01	South Eastern Area Laboratory Services (SEALS)	NSW Health Pathology - Institute of Clinical Pathology and Medical Research; Westmead Hospital; University of Sydney	CIDM-PH et al. et al
Australia/NSW1393/2021	EPI_ISL_779402	2021-01-02	South Eastern Area Laboratory Services (SEALS)	NSW Health Pathology - Institute of Clinical Pathology and Medical Research; Westmead Hospital; University of Sydney	CIDM-PH et al. et al
Australia/NSW14/2020	EPI_ISL_413600	2020-03-03	Centre for Infectious Diseases and Microbiology - Public Health	NSW Health Pathology - Institute of Clinical Pathology and Medical Research; Westmead Hospital; University of Sydney	Gall et al
Australia/NSW140/2020	EPI_ISL_427799	2020-03-25	Centre for Infectious Diseases and Microbiology Public Health	NSW Health Pathology - Institute of Clinical Pathology and Medical Research; Westmead Hospital; University of Sydney	Draper J et al
Australia/NSW1409/2020	EPI_ISL_792024	2020-12-17	Pathology North - Royal North Shore Hospital - NSW Health Pathology	NSW Health Pathology - Institute of Clinical Pathology and Medical Research; Westmead Hospital; University of Sydney	CIDM-PH et al. et al
Australia/NSW141/2020	EPI_ISL_427802	2020-03-22	Centre for Infectious Diseases and Microbiology Public Health	NSW Health Pathology - Institute of Clinical Pathology and Medical Research; Westmead Hospital; University of Sydney	Sim E et al
Australia/NSW1410/2020	EPI_ISL_792025	2020-12-17	Pathology North - Royal North Shore Hospital - NSW Health Pathology	NSW Health Pathology - Institute of Clinical Pathology and Medical Research; Westmead Hospital; University of Sydney	CIDM-PH et al. et al
Australia/NSW1411/2020	EPI_ISL_792026	2020-12-19	Douglass Hanly Moir Pathology	NSW Health Pathology - Institute of Clinical Pathology and Medical Research; Westmead Hospital; University of Sydney	CIDM-PH et al. et al
Australia/NSW1412/2020	EPI_ISL_792027	2020-12-18	Pathology North - Royal North Shore Hospital - NSW Health Pathology	NSW Health Pathology - Institute of Clinical Pathology and Medical Research; Westmead Hospital; University of Sydney	CIDM-PH et al. et al
Australia/NSW1413/2020	EPI_ISL_792028	2020-12-18	Laverty Pathology	NSW Health Pathology - Institute of Clinical Pathology and Medical Research; Westmead Hospital; University of Sydney	CIDM-PH et al. et al
Australia/NSW1414/2020	EPI_ISL_792029	2020-12-20	Laverty Pathology	NSW Health Pathology - Institute of Clinical Pathology and Medical Research; Westmead Hospital; University of Sydney	CIDM-PH et al. et al
Australia/NSW1416/2020	EPI_ISL_792030	2020-12-20	Laverty Pathology	NSW Health Pathology - Institute of Clinical Pathology and Medical Research; Westmead Hospital; University of Sydney	CIDM-PH et al. et al
Australia/NSW1417/2020	EPI_ISL_792031	2020-12-20	Histopath	NSW Health Pathology - Institute of Clinical Pathology and Medical Research; Westmead Hospital; University of Sydney	CIDM-PH et al. et al
Australia/NSW1418/2020	EPI_ISL_792032	2020-12-22	Pathology West - NSW Health Pathology	NSW Health Pathology - Institute of Clinical Pathology and Medical Research; Westmead Hospital; University of Sydney	CIDM-PH et al. et al
Australia/NSW1419/2020	EPI_ISL_792033	2020-12-22	Laverty Pathology	NSW Health Pathology - Institute of Clinical Pathology and Medical Research; Westmead Hospital; University of Sydney	CIDM-PH et al. et al
Australia/NSW142/2020	EPI_ISL_427749	2020-03-24	Centre for Infectious Diseases and Microbiology Public Health	NSW Health Pathology - Institute of Clinical Pathology and Medical Research; Westmead Hospital; University of Sydney	Bachmann N et al
Australia/NSW1420/2020	EPI_ISL_792034	2020-12-22	Douglass Hanly Moir Pathology	NSW Health Pathology - Institute of Clinical Pathology and Medical Research; Westmead Hospital; University of Sydney	CIDM-PH et al. et al
Australia/NSW1421/2020	EPI_ISL_792035	2020-12-18	South Eastern Area Laboratory Services (SEALS)	NSW Health Pathology - Institute of Clinical Pathology and Medical Research; Westmead Hospital; University of Sydney	CIDM-PH et al. et al
Australia/NSW1422/2020	EPI_ISL_792036	2020-12-20	South Eastern Area Laboratory Services (SEALS)	NSW Health Pathology - Institute of Clinical Pathology and Medical Research; Westmead Hospital; University of Sydney	CIDM-PH et al. et al
Australia/NSW1423/2021	EPI_ISL_792037	2021-01-01	South Eastern Area Laboratory Services (SEALS)	NSW Health Pathology - Institute of Clinical Pathology and Medical Research; Westmead Hospital; University of Sydney	CIDM-PH et al. et al
Australia/NSW1424/2021	EPI_ISL_803108	2021-01-10	Pathology West - NSW Health Pathology	NSW Health Pathology - Institute of Clinical Pathology and Medical Research; Westmead Hospital; University of Sydney	CIDM-PH et al. et al
Australia/NSW1425/2021	EPI_ISL_803109	2021-01-11	Pathology West - NSW Health Pathology	NSW Health Pathology - Institute of Clinical Pathology and Medical Research; Westmead Hospital; University of Sydney	CIDM-PH et al. et al
Australia/NSW1426/2021	EPI_ISL_803110	2021-01-08	Sydney South West Pathology Service (SSWPS) - Royal Prince Alfred Hospital - NSW Health Pathology	NSW Health Pathology - Institute of Clinical Pathology and Medical Research; Westmead Hospital; University of Sydney	CIDM-PH et al. et al
Australia/NSW1427/2021	EPI_ISL_803111	2021-01-08	Sydney South West Pathology Service (SSWPS) - Royal Prince Alfred Hospital - NSW Health Pathology	NSW Health Pathology - Institute of Clinical Pathology and Medical Research; Westmead Hospital; University of Sydney	CIDM-PH et al. et al
Australia/NSW1428/2021	EPI_ISL_803112	2021-01-08	Sydney South West Pathology Service (SSWPS) - Royal Prince Alfred Hospital - NSW Health Pathology	NSW Health Pathology - Institute of Clinical Pathology and Medical Research; Westmead Hospital; University of Sydney	CIDM-PH et al. et al
Australia/NSW1429/2021	EPI_ISL_803113	2021-01-08	Sydney South West Pathology Service (SSWPS) - Royal Prince Alfred Hospital - NSW Health Pathology	NSW Health Pathology - Institute of Clinical Pathology and Medical Research; Westmead Hospital; University of Sydney	CIDM-PH et al. et al
Australia/NSW143/2020	EPI_ISL_427737	2020-03-21	Centre for Infectious Diseases and Microbiology Public Health	NSW Health Pathology - Institute of Clinical Pathology and Medical Research; Westmead Hospital; University of Sydney	Rockett R et al
Australia/NSW1430/2021	EPI_ISL_803114	2021-01-08	Sydney South West Pathology Service (SSWPS) - Royal Prince Alfred Hospital - NSW Health Pathology	NSW Health Pathology - Institute of Clinical Pathology and Medical Research; Westmead Hospital; University of Sydney	CIDM-PH et al. et al
Australia/NSW1431/2020	EPI_ISL_806718	2020-11-08	Sydney South West Pathology Service (SSWPS) - Royal Prince Alfred Hospital - NSW Health Pathology	NSW Health Pathology - Institute of Clinical Pathology and Medical Research; Westmead Hospital; University of Sydney	CIDM-PH et al. et al
Australia/NSW1432/2020	EPI_ISL_806719	2020-12-24	Pathology North - Royal North Shore Hospital - NSW Health Pathology	NSW Health Pathology - Institute of Clinical Pathology and Medical Research; Westmead Hospital; University of Sydney	CIDM-PH et al. et al
Australia/NSW1433/2020	EPI_ISL_806720	2020-12-26	Laverty Pathology	NSW Health Pathology - Institute of Clinical Pathology and Medical Research; Westmead Hospital; University of Sydney	CIDM-PH et al. et al
Australia/NSW1434/2020	EPI_ISL_806721	2020-12-27	Histopath	NSW Health Pathology - Institute of Clinical Pathology and Medical Research; Westmead Hospital; University of Sydney	CIDM-PH et al. et al
Australia/NSW1435/2020	EPI_ISL_806722	2020-12-27	South Eastern Area Laboratory Services (SEALS)	NSW Health Pathology - Institute of Clinical Pathology and Medical Research; Westmead Hospital; University of Sydney	CIDM-PH et al. et al
Australia/NSW1436/2020	EPI_ISL_806723	2020-12-31	4Cyte Pathology	NSW Health Pathology - Institute of Clinical Pathology and Medical Research; Westmead Hospital; University of Sydney	CIDM-PH et al. et al
Australia/NSW1437/2020	EPI_ISL_806724	2020-12-29	Sydney South West Pathology Service (SSWPS) - Royal Prince Alfred Hospital - NSW Health Pathology	NSW Health Pathology - Institute of Clinical Pathology and Medical Research; Westmead Hospital; University of Sydney	CIDM-PH et al. et al
Australia/NSW1438/2021	EPI_ISL_806725	2021-01-02	Medlab Pathology	NSW Health Pathology - Institute of Clinical Pathology and Medical Research; Westmead Hospital; University of Sydney	CIDM-PH et al. et al
Australia/NSW1439/2021	EPI_ISL_806726	2021-01-01	4Cyte Pathology	NSW Health Pathology - Institute of Clinical Pathology and Medical Research; Westmead Hospital; University of Sydney	CIDM-PH et al. et al
Australia/NSW144/2020	EPI_ISL_427738	2020-03-21	Centre for Infectious Diseases and Microbiology Public Health	NSW Health Pathology - Institute of Clinical Pathology and Medical Research; Westmead Hospital; University of Sydney	Lam C et al
Australia/NSW1440/2020	EPI_ISL_806727	2020-12-31	4Cyte Pathology	NSW Health Pathology - Institute of Clinical Pathology and Medical Research; Westmead Hospital; University of Sydney	CIDM-PH et al. et al
Australia/NSW1441/2021	EPI_ISL_806728	2021-01-01	Sydney South West Pathology Service (SSWPS) - Liverpool Hospital - NSW Health Pathology	NSW Health Pathology - Institute of Clinical Pathology and Medical Research; Westmead Hospital; University of Sydney	CIDM-PH et al. et al
Australia/NSW1442/2021	EPI_ISL_806729	2021-01-06	Sydney South West Pathology Service (SSWPS) - Royal Prince Alfred Hospital - NSW Health Pathology	NSW Health Pathology - Institute of Clinical Pathology and Medical Research; Westmead Hospital; University of Sydney	CIDM-PH et al. et al
Australia/NSW1443/2020	EPI_ISL_812518	2020-12-18	Sydney South West Pathology Service (SSWPS) - Concord Repatriation General Hospital - NSW Health Pathology	NSW Health Pathology - Institute of Clinical Pathology and Medical Research; Westmead Hospital; University of Sydney	CIDM-PH et al. et al
Australia/NSW1444/2020	EPI_ISL_812519	2020-12-20	South Eastern Area Laboratory Services (SEALS)	NSW Health Pathology - Institute of Clinical Pathology and Medical Research; Westmead Hospital; University of Sydney	CIDM-PH et al. et al
Australia/NSW1446/2020	EPI_ISL_812520	2020-12-21	South Eastern Area Laboratory Services (SEALS)	NSW Health Pathology - Institute of Clinical Pathology and Medical Research; Westmead Hospital; University of Sydney	CIDM-PH et al. et al
Australia/NSW1447/2021	EPI_ISL_812521	2021-01-10	Pathology North - Royal North Shore Hospital - NSW Health Pathology	NSW Health Pathology - Institute of Clinical Pathology and Medical Research; Westmead Hospital; University of Sydney	CIDM-PH et al. et al
Australia/NSW1448/2021	EPI_ISL_825016	2021-01-08	Sydney South West Pathology Service (SSWPS) - Royal Prince Alfred Hospital - NSW Health Pathology	NSW Health Pathology - Institute of Clinical Pathology and Medical Research; Westmead Hospital; University of Sydney	CIDM-PH et al. et al
Australia/NSW1449/2020	EPI_ISL_845785	2020-11-13	South Eastern Area Laboratory Services (SEALS)	NSW Health Pathology - Institute of Clinical Pathology and Medical Research; Westmead Hospital; University of Sydney	CIDM-PH et al. et al
Australia/NSW145/2020	EPI_ISL_427708	2020-03-21	Centre for Infectious Diseases and Microbiology Public Health	NSW Health Pathology - Institute of Clinical Pathology and Medical Research; Westmead Hospital; University of Sydney	Gray K et al
Australia/NSW1450/2020	EPI_ISL_845786	2020-11-25	South Eastern Area Laboratory Services (SEALS)	NSW Health Pathology - Institute of Clinical Pathology and Medical Research; Westmead Hospital; University of Sydney	CIDM-PH et al. et al
Australia/NSW1451/2020	EPI_ISL_845787	2020-11-27	South Eastern Area Laboratory Services (SEALS)	NSW Health Pathology - Institute of Clinical Pathology and Medical Research; Westmead Hospital; University of Sydney	CIDM-PH et al. et al
Australia/NSW1452/2020	EPI_ISL_845788	2020-11-25	South Eastern Area Laboratory Services (SEALS)	NSW Health Pathology - Institute of Clinical Pathology and Medical Research; Westmead Hospital; University of Sydney	CIDM-PH et al. et al
Australia/NSW1453/2020	EPI_ISL_845789	2020-11-25	South Eastern Area Laboratory Services (SEALS)	NSW Health Pathology - Institute of Clinical Pathology and Medical Research; Westmead Hospital; University of Sydney	CIDM-PH et al. et al
Australia/NSW1454/2020	EPI_ISL_845790	2020-11-26	South Eastern Area Laboratory Services (SEALS)	NSW Health Pathology - Institute of Clinical Pathology and Medical Research; Westmead Hospital; University of Sydney	CIDM-PH et al. et al
Australia/NSW1455/2020	EPI_ISL_845791	2020-11-28	South Eastern Area Laboratory Services (SEALS)	NSW Health Pathology - Institute of Clinical Pathology and Medical Research; Westmead Hospital; University of Sydney	CIDM-PH et al. et al
Australia/NSW1456/2020	EPI_ISL_845792	2020-11-28	South Eastern Area Laboratory Services (SEALS)	NSW Health Pathology - Institute of Clinical Pathology and Medical Research; Westmead Hospital; University of Sydney	CIDM-PH et al. et al
Australia/NSW1457/2020	EPI_ISL_845793	2020-11-28	South Eastern Area Laboratory Services (SEALS)	NSW Health Pathology - Institute of Clinical Pathology and Medical Research; Westmead Hospital; University of Sydney	CIDM-PH et al. et al
Australia/NSW1458/2020	EPI_ISL_845794	2020-11-30	South Eastern Area Laboratory Services (SEALS)	NSW Health Pathology - Institute of Clinical Pathology and Medical Research; Westmead Hospital; University of Sydney	CIDM-PH et al. et al
Australia/NSW1459/2020	EPI_ISL_845795	2020-11-28	South Eastern Area Laboratory Services (SEALS)	NSW Health Pathology - Institute of Clinical Pathology and Medical Research; Westmead Hospital; University of Sydney	CIDM-PH et al. et al
Australia/NSW146/2020	EPI_ISL_427682	2020-03-23	Centre for Infectious Diseases and Microbiology Public Health	NSW Health Pathology - Institute of Clinical Pathology and Medical Research; Westmead Hospital; University of Sydney	Timms V et al
Australia/NSW1460/2020	EPI_ISL_845796	2020-12-18	Histopath	NSW Health Pathology - Institute of Clinical Pathology and Medical Research; Westmead Hospital; University of Sydney	CIDM-PH et al. et al
Australia/NSW1461/2021	EPI_ISL_845797	2021-01-10	South Eastern Area Laboratory Services (SEALS)	NSW Health Pathology - Institute of Clinical Pathology and Medical Research; Westmead Hospital; University of Sydney	CIDM-PH et al. et al
Australia/NSW1462/2021	EPI_ISL_845798	2021-01-10	Sydney South West Pathology Service (SSWPS) - Royal Prince Alfred Hospital - NSW Health Pathology	NSW Health Pathology - Institute of Clinical Pathology and Medical Research; Westmead Hospital; University of Sydney	CIDM-PH et al. et al
Australia/NSW1463/2021	EPI_ISL_845799	2021-01-08	Sydney South West Pathology Service (SSWPS) - Royal Prince Alfred Hospital - NSW Health Pathology	NSW Health Pathology - Institute of Clinical Pathology and Medical Research; Westmead Hospital; University of Sydney	CIDM-PH et al. et al
Australia/NSW1466/2021	EPI_ISL_845802	2021-01-15	Medlab Pathology	NSW Health Pathology - Institute of Clinical Pathology and Medical Research; Westmead Hospital; University of Sydney	CIDM-PH et al. et al
Australia/NSW1467/2021	EPI_ISL_845803	2021-01-15	Medlab Pathology	NSW Health Pathology - Institute of Clinical Pathology and Medical Research; Westmead Hospital; University of Sydney	CIDM-PH et al. et al
Australia/NSW1468/2021	EPI_ISL_845804	2021-01-15	Medlab Pathology	NSW Health Pathology - Institute of Clinical Pathology and Medical Research; Westmead Hospital; University of Sydney	CIDM-PH et al. et al
Australia/NSW1469/2021	EPI_ISL_845805	2021-01-15	Sydney South West Pathology Service (SSWPS) - Royal Prince Alfred Hospital - NSW Health Pathology	NSW Health Pathology - Institute of Clinical Pathology and Medical Research; Westmead Hospital; University of Sydney	CIDM-PH et al. et al
Australia/NSW147/2020	EPI_ISL_427764	2020-03-25	Centre for Infectious Diseases and Microbiology Public Health	NSW Health Pathology - Institute of Clinical Pathology and Medical Research; Westmead Hospital; University of Sydney	Gall M et al
Australia/NSW1470/2021	EPI_ISL_845806	2021-01-13	Sydney South West Pathology Service (SSWPS) - Royal Prince Alfred Hospital - NSW Health Pathology	NSW Health Pathology - Institute of Clinical Pathology and Medical Research; Westmead Hospital; University of Sydney	CIDM-PH et al. et al
Australia/NSW1471/2020	EPI_ISL_845784	2020-11-13	South Eastern Area Laboratory Services (SEALS)	NSW Health Pathology - Institute of Clinical Pathology and Medical Research; Westmead Hospital; University of Sydney	CIDM-PH et al. et al
Australia/NSW1473/2021	EPI_ISL_857308	2021-01-09	South Eastern Area Laboratory Services (SEALS)	NSW Health Pathology - Institute of Clinical Pathology and Medical Research; Westmead Hospital; University of Sydney	CIDM-PH et al. et al
Australia/NSW1474/2021	EPI_ISL_857309	2021-01-14	Medlab Pathology	NSW Health Pathology - Institute of Clinical Pathology and Medical Research; Westmead Hospital; University of Sydney	CIDM-PH et al. et al
Australia/NSW1475/2021	EPI_ISL_857310	2021-01-15	South Eastern Area Laboratory Services (SEALS)	NSW Health Pathology - Institute of Clinical Pathology and Medical Research; Westmead Hospital; University of Sydney	CIDM-PH et al. et al
Australia/NSW1476/2021	EPI_ISL_857311	2021-01-15	South Eastern Area Laboratory Services (SEALS)	NSW Health Pathology - Institute of Clinical Pathology and Medical Research; Westmead Hospital; University of Sydney	CIDM-PH et al. et al
Australia/NSW1477/2021	EPI_ISL_857312	2021-01-15	South Eastern Area Laboratory Services (SEALS)	NSW Health Pathology - Institute of Clinical Pathology and Medical Research; Westmead Hospital; University of Sydney	CIDM-PH et al. et al
Australia/NSW1478/2021	EPI_ISL_857313	2021-01-17	South Eastern Area Laboratory Services (SEALS)	NSW Health Pathology - Institute of Clinical Pathology and Medical Research; Westmead Hospital; University of Sydney	CIDM-PH et al. et al
Australia/NSW1479/2020	EPI_ISL_872572	2020-12-31	Sydney South West Pathology Service (SSWPS) - Liverpool Hospital - NSW Health Pathology	NSW Health Pathology - Institute of Clinical Pathology and Medical Research; Westmead Hospital; University of Sydney	CIDM-PH et al. et al
Australia/NSW148/2020	EPI_ISL_427683	2020-03-23	Centre for Infectious Diseases and Microbiology Public Health	NSW Health Pathology - Institute of Clinical Pathology and Medical Research; Westmead Hospital; University of Sydney	Arnott A et al
Australia/NSW1480/2021	EPI_ISL_872573	2021-01-04	Laverty Pathology	NSW Health Pathology - Institute of Clinical Pathology and Medical Research; Westmead Hospital; University of Sydney	CIDM-PH et al. et al
Australia/NSW1481/2020	EPI_ISL_872574	2020-12-22	South Eastern Area Laboratory Services (SEALS)	NSW Health Pathology - Institute of Clinical Pathology and Medical Research; Westmead Hospital; University of Sydney	CIDM-PH et al. et al
Australia/NSW1482/2021	EPI_ISL_872575	2021-01-02	South Eastern Area Laboratory Services (SEALS)	NSW Health Pathology - Institute of Clinical Pathology and Medical Research; Westmead Hospital; University of Sydney	CIDM-PH et al. et al
Australia/NSW1483/2021	EPI_ISL_872576	2021-01-06	Laverty Pathology	NSW Health Pathology - Institute of Clinical Pathology and Medical Research; Westmead Hospital; University of Sydney	CIDM-PH et al. et al
Australia/NSW1484/2021	EPI_ISL_872577	2021-01-04	South Eastern Area Laboratory Services (SEALS)	NSW Health Pathology - Institute of Clinical Pathology and Medical Research; Westmead Hospital; University of Sydney	CIDM-PH et al. et al
Australia/NSW1485/2021	EPI_ISL_872578	2021-01-06	Sydney South West Pathology Service (SSWPS) - Liverpool Hospital - NSW Health Pathology	NSW Health Pathology - Institute of Clinical Pathology and Medical Research; Westmead Hospital; University of Sydney	CIDM-PH et al. et al
Australia/NSW1486/2021	EPI_ISL_872579	2021-01-08	Sydney South West Pathology Service (SSWPS) - Royal Prince Alfred Hospital - NSW Health Pathology	NSW Health Pathology - Institute of Clinical Pathology and Medical Research; Westmead Hospital; University of Sydney	CIDM-PH et al. et al
Australia/NSW1487/2021	EPI_ISL_872580	2021-01-10	Histopath	NSW Health Pathology - Institute of Clinical Pathology and Medical Research; Westmead Hospital; University of Sydney	CIDM-PH et al. et al
Australia/NSW1488/2021	EPI_ISL_872581	2021-01-10	St Vincent's Pathology (SydPath)	NSW Health Pathology - Institute of Clinical Pathology and Medical Research; Westmead Hospital; University of Sydney	CIDM-PH et al. et al
Australia/NSW1489/2021	EPI_ISL_872582	2021-01-09	South Eastern Area Laboratory Services (SEALS)	NSW Health Pathology - Institute of Clinical Pathology and Medical Research; Westmead Hospital; University of Sydney	CIDM-PH et al. et al
Australia/NSW149/2020	EPI_ISL_427775	2020-03-26	Centre for Infectious Diseases and Microbiology Public Health	NSW Health Pathology - Institute of Clinical Pathology and Medical Research; Westmead Hospital; University of Sydney	Sadsad R et al
Australia/NSW1490/2021	EPI_ISL_872583	2021-01-18	South Eastern Area Laboratory Services (SEALS)	NSW Health Pathology - Institute of Clinical Pathology and Medical Research; Westmead Hospital; University of Sydney	CIDM-PH et al. et al
Australia/NSW1491/2021	EPI_ISL_872584	2021-01-19	South Eastern Area Laboratory Services (SEALS)	NSW Health Pathology - Institute of Clinical Pathology and Medical Research; Westmead Hospital; University of Sydney	CIDM-PH et al. et al
Australia/NSW1492/2020	EPI_ISL_872585	2020-12-16	Australian Clinical Labs	NSW Health Pathology - Institute of Clinical Pathology and Medical Research; Westmead Hospital; University of Sydney	CIDM-PH et al. et al
Australia/NSW1493/2021	EPI_ISL_872586	2021-01-18	Sydney South West Pathology Service (SSWPS) - Royal Prince Alfred Hospital - NSW Health Pathology	NSW Health Pathology - Institute of Clinical Pathology and Medical Research; Westmead Hospital; University of Sydney	CIDM-PH et al. et al
Australia/NSW1494/2021	EPI_ISL_872587	2021-01-22	Sydney South West Pathology Service (SSWPS) - Royal Prince Alfred Hospital - NSW Health Pathology	NSW Health Pathology - Institute of Clinical Pathology and Medical Research; Westmead Hospital; University of Sydney	CIDM-PH et al. et al
Australia/NSW1495/2021	EPI_ISL_872588	2021-01-13	Sydney South West Pathology Service (SSWPS) - Royal Prince Alfred Hospital - NSW Health Pathology	NSW Health Pathology - Institute of Clinical Pathology and Medical Research; Westmead Hospital; University of Sydney	CIDM-PH et al. et al
Australia/NSW1498/2021	EPI_ISL_912186	2021-01-26	Sydney South West Pathology Service (SSWPS) - Concord Repatriation General Hospital - NSW Health Pathology	NSW Health Pathology - Institute of Clinical Pathology and Medical Research; Westmead Hospital; University of Sydney	CIDM-PH et al. et al
Australia/NSW15/2020	EPI_ISL_417383	2020-03-03	Centre for Infectious Diseases and Microbiology Public Health	NSW Health Pathology - Institute of Clinical Pathology and Medical Research; Westmead Hospital; University of Sydney	Rockett R et al
Australia/NSW150/2020	EPI_ISL_427796	2020-03-19	Centre for Infectious Diseases and Microbiology Public Health	NSW Health Pathology - Institute of Clinical Pathology and Medical Research; Westmead Hospital; University of Sydney	Draper J et al
Australia/NSW1500/2021	EPI_ISL_914876	2021-01-21	Sydney South West Pathology Service (SSWPS) - Royal Prince Alfred Hospital - NSW Health Pathology	NSW Health Pathology - Institute of Clinical Pathology and Medical Research; Westmead Hospital; University of Sydney	CIDM-PH et al. et al
Australia/NSW1501/2021	EPI_ISL_914877	2021-01-22	Sydney South West Pathology Service (SSWPS) - Royal Prince Alfred Hospital - NSW Health Pathology	NSW Health Pathology - Institute of Clinical Pathology and Medical Research; Westmead Hospital; University of Sydney	CIDM-PH et al. et al
Australia/NSW1502/2021	EPI_ISL_942895	2021-01-31	South Eastern Area Laboratory Services (SEALS)	NSW Health Pathology - Institute of Clinical Pathology and Medical Research; Westmead Hospital; University of Sydney	CIDM-PH et al. et al
Australia/NSW1503/2020	EPI_ISL_1098647	2020-11-19	South Eastern Area Laboratory Services (SEALS)	NSW Health Pathology - Institute of Clinical Pathology and Medical Research; Westmead Hospital; University of Sydney	CIDM-PH et al. et al
Australia/NSW1504/2021	EPI_ISL_1098649	2021-02-05	South Eastern Area Laboratory Services (SEALS)	NSW Health Pathology - Institute of Clinical Pathology and Medical Research; Westmead Hospital; University of Sydney	CIDM-PH et al. et al
Australia/NSW1505/2021	EPI_ISL_1098648	2021-02-07	South Eastern Area Laboratory Services (SEALS)	NSW Health Pathology - Institute of Clinical Pathology and Medical Research; Westmead Hospital; University of Sydney	CIDM-PH et al. et al
Australia/NSW1506/2021	EPI_ISL_1098650	2021-02-06	South Eastern Area Laboratory Services (SEALS)	NSW Health Pathology - Institute of Clinical Pathology and Medical Research; Westmead Hospital; University of Sydney	CIDM-PH et al. et al
Australia/NSW1507/2021	EPI_ISL_1098651	2021-02-23	South Eastern Area Laboratory Services (SEALS)	NSW Health Pathology - Institute of Clinical Pathology and Medical Research; Westmead Hospital; University of Sydney	CIDM-PH et al. et al
Australia/NSW1508/2021	EPI_ISL_1098652	2021-02-24	South Eastern Area Laboratory Services (SEALS)	NSW Health Pathology - Institute of Clinical Pathology and Medical Research; Westmead Hospital; University of Sydney	CIDM-PH et al. et al
Australia/NSW151/2020	EPI_ISL_427721	2020-03-18	ACT Pathology, The Canberra Hospital	NSW Health Pathology - Institute of Clinical Pathology and Medical Research; Westmead Hospital; University of Sydney	Sim E et al
Australia/NSW152/2020	EPI_ISL_427648	2020-03-06	Centre for Infectious Diseases and Microbiology Public Health	NSW Health Pathology - Institute of Clinical Pathology and Medical Research; Westmead Hospital; University of Sydney	Bachmann N et al
Australia/NSW153/2020	EPI_ISL_427653	2020-03-08	Centre for Infectious Diseases and Microbiology Public Health	NSW Health Pathology - Institute of Clinical Pathology and Medical Research; Westmead Hospital; University of Sydney	Rockett R et al
Australia/NSW154/2020	EPI_ISL_427652	2020-03-09	Centre for Infectious Diseases and Microbiology Public Health	NSW Health Pathology - Institute of Clinical Pathology and Medical Research; Westmead Hospital; University of Sydney	Lam C et al
Australia/NSW155/2020	EPI_ISL_427647	2020-03-06	Centre for Infectious Diseases and Microbiology Public Health	NSW Health Pathology - Institute of Clinical Pathology and Medical Research; Westmead Hospital; University of Sydney	Gray K et al
Australia/NSW156/2020	EPI_ISL_427719	2020-03-18	ACT Pathology, The Canberra Hospital	NSW Health Pathology - Institute of Clinical Pathology and Medical Research; Westmead Hospital; University of Sydney	Timms V et al
Australia/NSW157/2020	EPI_ISL_427674	2020-03-22	Centre for Infectious Diseases and Microbiology Public Health	NSW Health Pathology - Institute of Clinical Pathology and Medical Research; Westmead Hospital; University of Sydney	Gall M et al
Australia/NSW158/2020	EPI_ISL_427735	2020-03-16	Centre for Infectious Diseases and Microbiology Public Health	NSW Health Pathology - Institute of Clinical Pathology and Medical Research; Westmead Hospital; University of Sydney	Arnott A et al
Australia/NSW159/2020	EPI_ISL_427781	2020-03-24	Centre for Infectious Diseases and Microbiology Public Health	NSW Health Pathology - Institute of Clinical Pathology and Medical Research; Westmead Hospital; University of Sydney	Sadsad R et al
Australia/NSW160/2020	EPI_ISL_427784	2020-03-24	Centre for Infectious Diseases and Microbiology Public Health	NSW Health Pathology - Institute of Clinical Pathology and Medical Research; Westmead Hospital; University of Sydney	Draper J et al
Australia/NSW161/2020	EPI_ISL_427788	2020-03-24	Centre for Infectious Diseases and Microbiology Public Health	NSW Health Pathology - Institute of Clinical Pathology and Medical Research; Westmead Hospital; University of Sydney	Sim E et al
Australia/NSW162/2020	EPI_ISL_427758	2020-03-23	Centre for Infectious Diseases and Microbiology Public Health	NSW Health Pathology - Institute of Clinical Pathology and Medical Research; Westmead Hospital; University of Sydney	Bachmann N et al
Australia/NSW163/2020	EPI_ISL_427789	2020-03-20	Centre for Infectious Diseases and Microbiology Public Health	NSW Health Pathology - Institute of Clinical Pathology and Medical Research; Westmead Hospital; University of Sydney	Rockett R et al
Australia/NSW164/2020	EPI_ISL_427715	2020-03-22	Centre for Infectious Diseases and Microbiology Public Health	NSW Health Pathology - Institute of Clinical Pathology and Medical Research; Westmead Hospital; University of Sydney	Lam C et al
Australia/NSW165/2020	EPI_ISL_427731	2020-03-17	Centre for Infectious Diseases and Microbiology Public Health	NSW Health Pathology - Institute of Clinical Pathology and Medical Research; Westmead Hospital; University of Sydney	Gray K et al
Australia/NSW166/2020	EPI_ISL_427771	2020-03-25	Centre for Infectious Diseases and Microbiology Public Health	NSW Health Pathology - Institute of Clinical Pathology and Medical Research; Westmead Hospital; University of Sydney	Timms V et al
Australia/NSW167/2020	EPI_ISL_427697	2020-03-22	Centre for Infectious Diseases and Microbiology Public Health	NSW Health Pathology - Institute of Clinical Pathology and Medical Research; Westmead Hospital; University of Sydney	Gall M et al
Australia/NSW168/2020	EPI_ISL_427739	2020-03-21	Centre for Infectious Diseases and Microbiology Public Health	NSW Health Pathology - Institute of Clinical Pathology and Medical Research; Westmead Hospital; University of Sydney	Arnott A et al
Australia/NSW169/2020	EPI_ISL_427779	2020-03-20	Centre for Infectious Diseases and Microbiology Public Health	NSW Health Pathology - Institute of Clinical Pathology and Medical Research; Westmead Hospital; University of Sydney	Sadsad R et al
Australia/NSW170/2020	EPI_ISL_427676	2020-03-22	Centre for Infectious Diseases and Microbiology Public Health	NSW Health Pathology - Institute of Clinical Pathology and Medical Research; Westmead Hospital; University of Sydney	Draper J et al
Australia/NSW171/2020	EPI_ISL_427743	2020-03-21	Centre for Infectious Diseases and Microbiology Public Health	NSW Health Pathology - Institute of Clinical Pathology and Medical Research; Westmead Hospital; University of Sydney	Sim E et al
Australia/NSW173/2020	EPI_ISL_427801	2020-03-24	Centre for Infectious Diseases and Microbiology Public Health	NSW Health Pathology - Institute of Clinical Pathology and Medical Research; Westmead Hospital; University of Sydney	Rockett R et al
Australia/NSW174/2020	EPI_ISL_427668	2020-03-21	Centre for Infectious Diseases and Microbiology Public Health	NSW Health Pathology - Institute of Clinical Pathology and Medical Research; Westmead Hospital; University of Sydney	Lam C et al
Australia/NSW175/2020	EPI_ISL_427687	2020-03-18	Centre for Infectious Diseases and Microbiology Public Health	NSW Health Pathology - Institute of Clinical Pathology and Medical Research; Westmead Hospital; University of Sydney	Gray K et al
Australia/NSW176/2020	EPI_ISL_427734	2020-03-18	Centre for Infectious Diseases and Microbiology Public Health	NSW Health Pathology - Institute of Clinical Pathology and Medical Research; Westmead Hospital; University of Sydney	Timms V et al
Australia/NSW177/2020	EPI_ISL_427667	2020-03-23	Centre for Infectious Diseases and Microbiology Public Health	NSW Health Pathology - Institute of Clinical Pathology and Medical Research; Westmead Hospital; University of Sydney	Gall M et al
Australia/NSW178/2020	EPI_ISL_427670	2020-03-21	Centre for Infectious Diseases and Microbiology Public Health	NSW Health Pathology - Institute of Clinical Pathology and Medical Research; Westmead Hospital; University of Sydney	Arnott A et al
Australia/NSW179/2020	EPI_ISL_427685	2020-03-23	Centre for Infectious Diseases and Microbiology Public Health	NSW Health Pathology - Institute of Clinical Pathology and Medical Research; Westmead Hospital; University of Sydney	Sadsad R et al
Australia/NSW18/2020	EPI_ISL_417384	2020-03-05	Centre for Infectious Diseases and Microbiology Public Health	NSW Health Pathology - Institute of Clinical Pathology and Medical Research; Westmead Hospital; University of Sydney	Eden J-S et al
Australia/NSW180/2020	EPI_ISL_427701	2020-03-22	Centre for Infectious Diseases and Microbiology Public Health	NSW Health Pathology - Institute of Clinical Pathology and Medical Research; Westmead Hospital; University of Sydney	Draper J et al
Australia/NSW181/2020	EPI_ISL_427709	2020-03-21	Centre for Infectious Diseases and Microbiology Public Health	NSW Health Pathology - Institute of Clinical Pathology and Medical Research; Westmead Hospital; University of Sydney	Sim E et al
Australia/NSW182/2020	EPI_ISL_427713	2020-03-21	Centre for Infectious Diseases and Microbiology Public Health	NSW Health Pathology - Institute of Clinical Pathology and Medical Research; Westmead Hospital; University of Sydney	Bachmann N et al
Australia/NSW183/2020	EPI_ISL_427714	2020-03-22	Centre for Infectious Diseases and Microbiology Public Health	NSW Health Pathology - Institute of Clinical Pathology and Medical Research; Westmead Hospital; University of Sydney	Rockett R et al
Australia/NSW184/2020	EPI_ISL_427752	2020-03-25	Centre for Infectious Diseases and Microbiology Public Health	NSW Health Pathology - Institute of Clinical Pathology and Medical Research; Westmead Hospital; University of Sydney	Lam C et al
Australia/NSW185/2020	EPI_ISL_427793	2020-03-25	Centre for Infectious Diseases and Microbiology Public Health	NSW Health Pathology - Institute of Clinical Pathology and Medical Research; Westmead Hospital; University of Sydney	Gray K et al
Australia/NSW186/2020	EPI_ISL_427803	2020-03-23	Centre for Infectious Diseases and Microbiology Public Health	NSW Health Pathology - Institute of Clinical Pathology and Medical Research; Westmead Hospital; University of Sydney	Timms V et al
Australia/NSW187/2020	EPI_ISL_427691	2020-03-22	Centre for Infectious Diseases and Microbiology Public Health	NSW Health Pathology - Institute of Clinical Pathology and Medical Research; Westmead Hospital; University of Sydney	Gall M et al
Australia/NSW188/2020	EPI_ISL_427694	2020-03-22	Centre for Infectious Diseases and Microbiology Public Health	NSW Health Pathology - Institute of Clinical Pathology and Medical Research; Westmead Hospital; University of Sydney	Arnott A et al
Australia/NSW189/2020	EPI_ISL_427740	2020-03-21	Centre for Infectious Diseases and Microbiology Public Health	NSW Health Pathology - Institute of Clinical Pathology and Medical Research; Westmead Hospital; University of Sydney	Sadsad R et al
Australia/NSW19/2020	EPI_ISL_417385	2020-03-06	Centre for Infectious Diseases and Microbiology Public Health	NSW Health Pathology - Institute of Clinical Pathology and Medical Research; Westmead Hospital; University of Sydney	Lam C et al
Australia/NSW190/2020	EPI_ISL_427736	2020-03-20	Centre for Infectious Diseases and Microbiology Public Health	NSW Health Pathology - Institute of Clinical Pathology and Medical Research; Westmead Hospital; University of Sydney	Draper J et al
Australia/NSW191/2020	EPI_ISL_427786	2020-03-26	Centre for Infectious Diseases and Microbiology Public Health	NSW Health Pathology - Institute of Clinical Pathology and Medical Research; Westmead Hospital; University of Sydney	Sim E et al
Australia/NSW192/2020	EPI_ISL_427797	2020-03-25	Centre for Infectious Diseases and Microbiology Public Health	NSW Health Pathology - Institute of Clinical Pathology and Medical Research; Westmead Hospital; University of Sydney	Bachmann N et al
Australia/NSW193/2020	EPI_ISL_427798	2020-03-23	Centre for Infectious Diseases and Microbiology Public Health	NSW Health Pathology - Institute of Clinical Pathology and Medical Research; Westmead Hospital; University of Sydney	Rockett R et al
Australia/NSW194/2020	EPI_ISL_427763	2020-03-22	Centre for Infectious Diseases and Microbiology Public Health	NSW Health Pathology - Institute of Clinical Pathology and Medical Research; Westmead Hospital; University of Sydney	Lam C et al
Australia/NSW195/2020	EPI_ISL_427767	2020-03-21	Centre for Infectious Diseases and Microbiology Public Health	NSW Health Pathology - Institute of Clinical Pathology and Medical Research; Westmead Hospital; University of Sydney	Gray K et al
Australia/NSW196/2020	EPI_ISL_427806	2020-03-23	Centre for Infectious Diseases and Microbiology Public Health	NSW Health Pathology - Institute of Clinical Pathology and Medical Research; Westmead Hospital; University of Sydney	Timms V et al
Australia/NSW197/2020	EPI_ISL_427746	2020-03-23	Centre for Infectious Diseases and Microbiology Public Health	NSW Health Pathology - Institute of Clinical Pathology and Medical Research; Westmead Hospital; University of Sydney	Gall M et al
Australia/NSW198/2020	EPI_ISL_427707	2020-03-23	Centre for Infectious Diseases and Microbiology Public Health	NSW Health Pathology - Institute of Clinical Pathology and Medical Research; Westmead Hospital; University of Sydney	Arnott A et al
Australia/NSW199/2020	EPI_ISL_427747	2020-03-23	Centre for Infectious Diseases and Microbiology Public Health	NSW Health Pathology - Institute of Clinical Pathology and Medical Research; Westmead Hospital; University of Sydney	Sadsad R et al
Australia/NSW200/2020	EPI_ISL_427684	2020-03-23	Centre for Infectious Diseases and Microbiology Public Health	NSW Health Pathology - Institute of Clinical Pathology and Medical Research; Westmead Hospital; University of Sydney	Draper J et al
Australia/NSW2004/2020	EPI_ISL_500596	2020-03-15	Area of Virology, Serology and Virology Division (SAViD), New South Wales Health Pathology Randwick	Area of Virology, Serology and Virology Division (SAViD), New South Wales Health Pathology Randwick	Rawlinson et al
Australia/NSW2005/2020	EPI_ISL_500597	2020-03-14	Area of Virology, Serology and Virology Division (SAViD), New South Wales Health Pathology Randwick	Area of Virology, Serology and Virology Division (SAViD), New South Wales Health Pathology Randwick	Rawlinson et al
Australia/NSW201/2020	EPI_ISL_427710	2020-03-21	Centre for Infectious Diseases and Microbiology Public Health	NSW Health Pathology - Institute of Clinical Pathology and Medical Research; Westmead Hospital; University of Sydney	Sim E et al
Australia/NSW2011/2020	EPI_ISL_500598	2020-03-13	Area of Virology, Serology and Virology Division (SAViD), New South Wales Health Pathology Randwick	Area of Virology, Serology and Virology Division (SAViD), New South Wales Health Pathology Randwick	Rawlinson et al
Australia/NSW2013/2020	EPI_ISL_500599	2020-03-22	Area of Virology, Serology and Virology Division (SAViD), New South Wales Health Pathology Randwick	Area of Virology, Serology and Virology Division (SAViD), New South Wales Health Pathology Randwick	Rawlinson et al
Australia/NSW2014/2020	EPI_ISL_500600	2020-03-22	Area of Virology, Serology and Virology Division (SAViD), New South Wales Health Pathology Randwick	Area of Virology, Serology and Virology Division (SAViD), New South Wales Health Pathology Randwick	Rawlinson et al
Australia/NSW2017/2020	EPI_ISL_500601	2020-03-20	Area of Virology, Serology and Virology Division (SAViD), New South Wales Health Pathology Randwick	Area of Virology, Serology and Virology Division (SAViD), New South Wales Health Pathology Randwick	Rawlinson et al
Australia/NSW2018/2020	EPI_ISL_500602	2020-03-21	Area of Virology, Serology and Virology Division (SAViD), New South Wales Health Pathology Randwick	Area of Virology, Serology and Virology Division (SAViD), New South Wales Health Pathology Randwick	Rawlinson et al
Australia/NSW2019/2020	EPI_ISL_678292	2020-03-21	Area of Virology, Serology and Virology Division (SAViD), New South Wales Health Pathology Randwick	Virology Research Laboratory; Area of Virology, Serology and Virology Division (SAViD), New South Wales Health Pathology Randwick	Foster et al
Australia/NSW202/2020	EPI_ISL_427762	2020-03-23	Centre for Infectious Diseases and Microbiology Public Health	NSW Health Pathology - Institute of Clinical Pathology and Medical Research; Westmead Hospital; University of Sydney	Bachmann N et al
Australia/NSW2020/2020	EPI_ISL_500603	2020-03-21	Area of Virology, Serology and Virology Division (SAViD), New South Wales Health Pathology Randwick	Area of Virology, Serology and Virology Division (SAViD), New South Wales Health Pathology Randwick	Rawlinson et al
Australia/NSW2021/2020	EPI_ISL_500604	2020-03-20	Area of Virology, Serology and Virology Division (SAViD), New South Wales Health Pathology Randwick	Area of Virology, Serology and Virology Division (SAViD), New South Wales Health Pathology Randwick	Rawlinson et al
[truncated: 748,571+ more rows]
